# Supplementary material
Source: PubMed Central journal article supplement (PMC55835)
Supplement: nar_29_15_3145__1.pdf [file nar_29_15_3145__1.pdf]

HEADER

|      |    |     |     |   |        |         |        |                   |
|------|----|-----|-----|---|--------|---------|--------|-------------------|
| ATOM | 1  | P   | G A | 1 | -4.076 | -12.839 | 13.036 | 0.00nan0x7fffffff |
| ATOM | 2  | O1P | G A | 1 | -3.378 | -13.044 | 11.740 | 0.00nan0x7fffffff |
| ATOM | 3  | O2P | G A | 1 | -3.294 | -13.389 | 14.190 | 0.00nan0x7fffffff |
| ATOM | 4  | O5* | G A | 1 | -4.541 | -11.341 | 13.308 | 0.00nan0x7fffffff |
| ATOM | 5  | C5* | G A | 1 | -5.175 | -10.578 | 12.249 | 0.00nan0x7fffffff |
| ATOM | 6  | C4* | G A | 1 | -5.309 | -9.161  | 12.749 | 0.00nan0x7fffffff |
| ATOM | 7  | C3* | G A | 1 | -4.013 | -8.418  | 13.026 | 0.00nan0x7fffffff |
| ATOM | 8  | O4* | G A | 1 | -5.990 | -9.174  | 14.025 | 0.00nan0x7fffffff |
| ATOM | 9  | O2* | G A | 1 | -5.049 | -6.299  | 13.296 | 0.00nan0x7fffffff |
| ATOM | 10 | C2* | G A | 1 | -4.466 | -7.364  | 14.033 | 0.00nan0x7fffffff |
| ATOM | 11 | C1* | G A | 1 | -5.518 | -8.122  | 14.832 | 0.00nan0x7fffffff |
| ATOM | 12 | N9  | G A | 1 | -4.896 | -8.602  | 16.083 | 0.00nan0x7fffffff |
| ATOM | 13 | C8  | G A | 1 | -4.586 | -9.889  | 16.434 | 0.00nan0x7fffffff |
| ATOM | 14 | N7  | G A | 1 | -4.045 | -9.997  | 17.621 | 0.00nan0x7fffffff |
| ATOM | 15 | C5  | G A | 1 | -3.998 | -8.685  | 18.086 | 0.00nan0x7fffffff |
| ATOM | 16 | O6  | G A | 1 | -3.025 | -8.744  | 20.259 | 0.00nan0x7fffffff |
| ATOM | 17 | C6  | G A | 1 | -3.523 | -8.139  | 19.307 | 0.00nan0x7fffffff |
| ATOM | 18 | N1  | G A | 1 | -3.647 | -6.776  | 19.401 | 0.00nan0x7fffffff |
| ATOM | 19 | N2  | G A | 1 | -4.231 | -4.705  | 18.656 | 0.00nan0x7fffffff |
| ATOM | 20 | C2  | G A | 1 | -4.182 | -6.019  | 18.404 | 0.00nan0x7fffffff |
| ATOM | 21 | N3  | G A | 1 | -4.643 | -6.481  | 17.242 | 0.00nan0x7fffffff |
| ATOM | 22 | C4  | G A | 1 | -4.520 | -7.819  | 17.150 | 0.00nan0x7fffffff |
| ATOM | 23 | O3* | G A | 1 | -3.424 | -7.844  | 11.856 | 0.00nan0x7fffffff |
| ATOM | 24 | P   | U A | 2 | -1.825 | -7.788  | 11.686 | 0.00nan0x7fffffff |
| ATOM | 25 | O1P | U A | 2 | -1.632 | -7.903  | 10.217 | 0.00nan0x7fffffff |
| ATOM | 26 | O2P | U A | 2 | -1.168 | -8.908  | 12.432 | 0.00nan0x7fffffff |
| ATOM | 27 | O5* | U A | 2 | -1.426 | -6.369  | 12.296 | 0.00nan0x7fffffff |
| ATOM | 28 | C5* | U A | 2 | -2.147 | -5.176  | 11.895 | 0.00nan0x7fffffff |
| ATOM | 29 | C4* | U A | 2 | -1.821 | -4.099  | 12.901 | 0.00nan0x7fffffff |
| ATOM | 30 | C3* | U A | 2 | -0.366 | -3.989  | 13.323 | 0.00nan0x7fffffff |
| ATOM | 31 | O4* | U A | 2 | -2.527 | -4.379  | 14.132 | 0.00nan0x7fffffff |
| ATOM | 32 | O2* | U A | 2 | -0.641 | -1.927  | 14.466 | 0.00nan0x7fffffff |
| ATOM | 33 | C2* | U A | 2 | -0.485 | -3.320  | 14.690 | 0.00nan0x7fffffff |
| ATOM | 34 | C1* | U A | 2 | -1.767 | -3.937  | 15.233 | 0.00nan0x7fffffff |
| ATOM | 35 | N1  | U A | 2 | -1.401 | -5.042  | 16.146 | 0.00nan0x7fffffff |
| ATOM | 36 | C6  | U A | 2 | -1.625 | -6.352  | 15.839 | 0.00nan0x7fffffff |
| ATOM | 37 | C5  | U A | 2 | -1.296 | -7.352  | 16.671 | 0.00nan0x7fffffff |
| ATOM | 38 | O4  | U A | 2 | -0.342 | -7.860  | 18.782 | 0.00nan0x7fffffff |
| ATOM | 39 | C4  | U A | 2 | -0.695 | -7.009  | 17.916 | 0.00nan0x7fffffff |
| ATOM | 40 | N3  | U A | 2 | -0.480 | -5.694  | 18.211 | 0.00nan0x7fffffff |
| ATOM | 41 | O2  | U A | 2 | -0.618 | -3.509  | 17.636 | 0.00nan0x7fffffff |
| ATOM | 42 | C2  | U A | 2 | -0.820 | -4.688  | 17.353 | 0.00nan0x7fffffff |
| ATOM | 43 | O3* | U A | 2 | 0.438  | -3.236  | 12.410 | 0.00nan0x7fffffff |
| ATOM | 44 | P   | A A | 3 | 1.963  | -3.654  | 12.112 | 0.00nan0x7fffffff |
| ATOM | 45 | O1P | A A | 3 | 2.177  | -3.194  | 10.715 | 0.00nan0x7fffffff |
| ATOM | 46 | O2P | A A | 3 | 2.148  | -5.134  | 12.254 | 0.00nan0x7fffffff |
| ATOM | 47 | O5* | A A | 3 | 2.801  | -2.854  | 13.207 | 0.00nan0x7fffffff |
| ATOM | 48 | C5* | A A | 3 | 2.575  | -1.435  | 13.406 | 0.00nan0x7fffffff |
| ATOM | 49 | C4* | A A | 3 | 3.219  | -1.063  | 14.720 | 0.00nan0x7fffffff |
| ATOM | 50 | C3* | A A | 3 | 4.595  | -1.651  | 14.984 | 0.00nan0x7fffffff |
| ATOM | 51 | O4* | A A | 3 | 2.403  | -1.569  | 15.801 | 0.00nan0x7fffffff |
| ATOM | 52 | O2* | A A | 3 | 5.028  | -0.303  | 16.889 | 0.00nan0x7fffffff |
| ATOM | 53 | C2* | A A | 3 | 4.661  | -1.621  | 16.509 | 0.00nan0x7fffffff |
| ATOM | 54 | C1* | A A | 3 | 3.218  | -1.923  | 16.893 | 0.00nan0x7fffffff |
| ATOM | 55 | N9  | A A | 3 | 3.116  | -3.357  | 17.232 | 0.00nan0x7fffffff |
| ATOM | 56 | C8  | A A | 3 | 2.479  | -4.350  | 16.534 | 0.00nan0x7fffffff |
| ATOM | 57 | N7  | A A | 3 | 2.559  | -5.529  | 17.098 | 0.00nan0x7fffffff |
| ATOM | 58 | C5  | A A | 3 | 3.301  | -5.293  | 18.252 | 0.00nan0x7fffffff |
| ATOM | 59 | N6  | A A | 3 | 3.466  | -7.462  | 19.319 | 0.00nan0x7fffffff |
| ATOM | 60 | C6  | A A | 3 | 3.729  | -6.162  | 19.284 | 0.00nan0x7fffffff |
| ATOM | 61 | N1  | A A | 3 | 4.453  | -5.567  | 20.279 | 0.00nan0x7fffffff |
| ATOM | 62 | C2  | A A | 3 | 4.733  | -4.235  | 20.261 | 0.00nan0x7fffffff |
| ATOM | 63 | N3  | A A | 3 | 4.361  | -3.366  | 19.323 | 0.00nan0x7fffffff |

|      |     |     |     |   |        |         |        |                   |
|------|-----|-----|-----|---|--------|---------|--------|-------------------|
| ATOM | 64  | C4  | A A | 3 | 3.648  | -3.963  | 18.347 | 0.00nan0x7fffffff |
| ATOM | 65  | O3* | A A | 3 | 5.657  | -0.914  | 14.373 | 0.00nan0x7fffffff |
| ATOM | 66  | P   | G A | 4 | 6.941  | -1.667  | 13.760 | 0.00nan0x7fffffff |
| ATOM | 67  | O1P | G A | 4 | 7.361  | -0.777  | 12.646 | 0.00nan0x7fffffff |
| ATOM | 68  | O2P | G A | 4 | 6.577  | -3.039  | 13.282 | 0.00nan0x7fffffff |
| ATOM | 69  | O5* | G A | 4 | 7.967  | -1.728  | 14.980 | 0.00nan0x7fffffff |
| ATOM | 70  | C5* | G A | 4 | 8.260  | -0.533  | 15.748 | 0.00nan0x7fffffff |
| ATOM | 71  | C4* | G A | 4 | 8.934  | -0.980  | 17.023 | 0.00nan0x7fffffff |
| ATOM | 72  | C3* | G A | 4 | 9.995  | -2.058  | 16.880 | 0.00nan0x7fffffff |
| ATOM | 73  | O4* | G A | 4 | 7.943  | -1.571  | 17.894 | 0.00nan0x7fffffff |
| ATOM | 74  | O2* | G A | 4 | 10.795 | -1.853  | 19.106 | 0.00nan0x7fffffff |
| ATOM | 75  | C2* | G A | 4 | 9.997  | -2.682  | 18.273 | 0.00nan0x7fffffff |
| ATOM | 76  | C1* | G A | 4 | 8.526  | -2.599  | 18.660 | 0.00nan0x7fffffff |
| ATOM | 77  | N9  | G A | 4 | 7.902  | -3.914  | 18.406 | 0.00nan0x7fffffff |
| ATOM | 78  | C8  | G A | 4 | 6.984  | -4.242  | 17.443 | 0.00nan0x7fffffff |
| ATOM | 79  | N7  | G A | 4 | 6.611  | -5.496  | 17.476 | 0.00nan0x7fffffff |
| ATOM | 80  | C5  | G A | 4 | 7.334  | -6.031  | 18.539 | 0.00nan0x7fffffff |
| ATOM | 81  | O6  | G A | 4 | 6.740  | -8.331  | 18.706 | 0.00nan0x7fffffff |
| ATOM | 82  | C6  | G A | 4 | 7.372  | -7.342  | 19.083 | 0.00nan0x7fffffff |
| ATOM | 83  | N1  | G A | 4 | 8.223  | -7.485  | 20.149 | 0.00nan0x7fffffff |
| ATOM | 84  | N2  | G A | 4 | 9.743  | -6.762  | 21.683 | 0.00nan0x7fffffff |
| ATOM | 85  | C2  | G A | 4 | 8.964  | -6.454  | 20.639 | 0.00nan0x7fffffff |
| ATOM | 86  | N3  | G A | 4 | 8.965  | -5.207  | 20.167 | 0.00nan0x7fffffff |
| ATOM | 87  | C4  | G A | 4 | 8.130  | -5.067  | 19.119 | 0.00nan0x7fffffff |
| ATOM | 88  | O3* | G A | 4 | 11.277 | -1.550  | 16.503 | 0.00nan0x7fffffff |
| ATOM | 89  | P   | C A | 5 | 12.234 | -2.376  | 15.506 | 0.00nan0x7fffffff |
| ATOM | 90  | O1P | C A | 5 | 12.988 | -1.312  | 14.794 | 0.00nan0x7fffffff |
| ATOM | 91  | O2P | C A | 5 | 11.426 | -3.220  | 14.568 | 0.00nan0x7fffffff |
| ATOM | 92  | O5* | C A | 5 | 13.120 | -3.274  | 16.482 | 0.00nan0x7fffffff |
| ATOM | 93  | C5* | C A | 5 | 13.835 | -2.665  | 17.587 | 0.00nan0x7fffffff |
| ATOM | 94  | C4* | C A | 5 | 14.236 | -3.780  | 18.523 | 0.00nan0x7fffffff |
| ATOM | 95  | C3* | C A | 5 | 14.855 | -5.009  | 17.878 | 0.00nan0x7fffffff |
| ATOM | 96  | O4* | C A | 5 | 13.053 | -4.284  | 19.185 | 0.00nan0x7fffffff |
| ATOM | 97  | O2* | C A | 5 | 15.550 | -5.987  | 19.927 | 0.00nan0x7fffffff |
| ATOM | 98  | C2* | C A | 5 | 14.558 | -6.090  | 18.915 | 0.00nan0x7fffffff |
| ATOM | 99  | C1* | C A | 5 | 13.193 | -5.662  | 19.436 | 0.00nan0x7fffffff |
| ATOM | 100 | N1  | C A | 5 | 12.158 | -6.467  | 18.751 | 0.00nan0x7fffffff |
| ATOM | 101 | C6  | C A | 5 | 11.278 | -5.924  | 17.862 | 0.00nan0x7fffffff |
| ATOM | 102 | C5  | C A | 5 | 10.334 | -6.654  | 17.246 | 0.00nan0x7fffffff |
| ATOM | 103 | N4  | C A | 5 | 9.363  | -8.837  | 16.990 | 0.00nan0x7fffffff |
| ATOM | 104 | C4  | C A | 5 | 10.272 | -8.039  | 17.557 | 0.00nan0x7fffffff |
| ATOM | 105 | N3  | C A | 5 | 11.151 | -8.573  | 18.449 | 0.00nan0x7fffffff |
| ATOM | 106 | O2  | C A | 5 | 12.894 | -8.308  | 19.870 | 0.00nan0x7fffffff |
| ATOM | 107 | C2  | C A | 5 | 12.106 | -7.815  | 19.066 | 0.00nan0x7fffffff |
| ATOM | 108 | O3* | C A | 5 | 16.253 | -4.870  | 17.614 | 0.00nan0x7fffffff |
| ATOM | 109 | P   | U A | 6 | 16.917 | -5.515  | 16.298 | 0.00nan0x7fffffff |
| ATOM | 110 | O1P | U A | 6 | 18.003 | -4.559  | 15.957 | 0.00nan0x7fffffff |
| ATOM | 111 | O2P | U A | 6 | 15.908 | -5.639  | 15.197 | 0.00nan0x7fffffff |
| ATOM | 112 | O5* | U A | 6 | 17.424 | -6.945  | 16.787 | 0.00nan0x7fffffff |
| ATOM | 113 | C5* | U A | 6 | 18.212 | -7.071  | 17.998 | 0.00nan0x7fffffff |
| ATOM | 114 | C4* | U A | 6 | 18.177 | -8.526  | 18.400 | 0.00nan0x7fffffff |
| ATOM | 115 | C3* | U A | 6 | 18.424 | -9.535  | 17.291 | 0.00nan0x7fffffff |
| ATOM | 116 | O4* | U A | 6 | 16.851 | -8.844  | 18.883 | 0.00nan0x7fffffff |
| ATOM | 117 | O2* | U A | 6 | 18.620 | -11.406 | 18.740 | 0.00nan0x7fffffff |
| ATOM | 118 | C2* | U A | 6 | 17.723 | -10.779 | 17.834 | 0.00nan0x7fffffff |
| ATOM | 119 | C1* | U A | 6 | 16.532 | -10.178 | 18.566 | 0.00nan0x7fffffff |
| ATOM | 120 | N1  | U A | 6 | 15.336 | -10.284 | 17.702 | 0.00nan0x7fffffff |
| ATOM | 121 | C6  | U A | 6 | 14.709 | -9.191  | 17.181 | 0.00nan0x7fffffff |
| ATOM | 122 | C5  | U A | 6 | 13.609 | -9.287  | 16.419 | 0.00nan0x7fffffff |
| ATOM | 123 | O4  | U A | 6 | 12.056 | -10.809 | 15.470 | 0.00nan0x7fffffff |
| ATOM | 124 | C4  | U A | 6 | 13.087 | -10.589 | 16.170 | 0.00nan0x7fffffff |
| ATOM | 125 | N3  | U A | 6 | 13.716 | -11.672 | 16.708 | 0.00nan0x7fffffff |
| ATOM | 126 | O2  | U A | 6 | 15.389 | -12.546 | 17.959 | 0.00nan0x7fffffff |
| ATOM | 127 | C2  | U A | 6 | 14.835 | -11.557 | 17.482 | 0.00nan0x7fffffff |

|      |     |     |     |   |        |         |        |                   |
|------|-----|-----|-----|---|--------|---------|--------|-------------------|
| ATOM | 128 | O3* | U A | 6 | 19.813 | -9.760  | 17.033 | 0.00nan0x7fffffff |
| ATOM | 129 | P   | G A | 7 | 20.373 | -10.000 | 15.547 | 0.00nan0x7fffffff |
| ATOM | 130 | O1P | G A | 7 | 21.721 | -9.372  | 15.581 | 0.00nan0x7fffffff |
| ATOM | 131 | O2P | G A | 7 | 19.481 | -9.360  | 14.527 | 0.00nan0x7fffffff |
| ATOM | 132 | O5* | G A | 7 | 20.388 | -11.586 | 15.390 | 0.00nan0x7fffffff |
| ATOM | 133 | C5* | G A | 7 | 20.705 | -12.452 | 16.510 | 0.00nan0x7fffffff |
| ATOM | 134 | C4* | G A | 7 | 20.164 | -13.823 | 16.172 | 0.00nan0x7fffffff |
| ATOM | 135 | C3* | G A | 7 | 20.191 | -14.196 | 14.699 | 0.00nan0x7fffffff |
| ATOM | 136 | O4* | G A | 7 | 18.764 | -13.864 | 16.526 | 0.00nan0x7fffffff |
| ATOM | 137 | O2* | G A | 7 | 19.593 | -16.470 | 15.030 | 0.00nan0x7fffffff |
| ATOM | 138 | C2* | G A | 7 | 19.062 | -15.221 | 14.610 | 0.00nan0x7fffffff |
| ATOM | 139 | C1* | G A | 7 | 18.061 | -14.680 | 15.618 | 0.00nan0x7fffffff |
| ATOM | 140 | N9  | G A | 7 | 17.005 | -13.932 | 14.905 | 0.00nan0x7fffffff |
| ATOM | 141 | C8  | G A | 7 | 16.799 | -12.576 | 14.890 | 0.00nan0x7fffffff |
| ATOM | 142 | N7  | G A | 7 | 15.744 | -12.210 | 14.209 | 0.00nan0x7fffffff |
| ATOM | 143 | C5  | G A | 7 | 15.203 | -13.414 | 13.762 | 0.00nan0x7fffffff |
| ATOM | 144 | O6  | G A | 7 | 13.258 | -12.882 | 12.496 | 0.00nan0x7fffffff |
| ATOM | 145 | C6  | G A | 7 | 14.056 | -13.692 | 12.973 | 0.00nan0x7fffffff |
| ATOM | 146 | N1  | G A | 7 | 13.843 | -15.026 | 12.738 | 0.00nan0x7fffffff |
| ATOM | 147 | N2  | G A | 7 | 14.318 | -17.247 | 12.901 | 0.00nan0x7fffffff |
| ATOM | 148 | C2  | G A | 7 | 14.667 | -15.995 | 13.222 | 0.00nan0x7fffffff |
| ATOM | 149 | N3  | G A | 7 | 15.755 | -15.790 | 13.964 | 0.00nan0x7fffffff |
| ATOM | 150 | C4  | G A | 7 | 15.962 | -14.479 | 14.196 | 0.00nan0x7fffffff |
| ATOM | 151 | O3* | G A | 7 | 21.452 | -14.736 | 14.289 | 0.00nan0x7fffffff |
| ATOM | 152 | P   | A A | 8 | 22.052 | -14.466 | 12.827 | 0.00nan0x7fffffff |
| ATOM | 153 | O1P | A A | 8 | 23.521 | -14.589 | 13.025 | 0.00nan0x7fffffff |
| ATOM | 154 | O2P | A A | 8 | 21.663 | -13.109 | 12.324 | 0.00nan0x7fffffff |
| ATOM | 155 | O5* | A A | 8 | 21.410 | -15.622 | 11.933 | 0.00nan0x7fffffff |
| ATOM | 156 | C5* | A A | 8 | 20.577 | -16.652 | 12.526 | 0.00nan0x7fffffff |
| ATOM | 157 | C4* | A A | 8 | 19.724 | -17.229 | 11.420 | 0.00nan0x7fffffff |
| ATOM | 158 | C3* | A A | 8 | 19.931 | -16.620 | 10.042 | 0.00nan0x7fffffff |
| ATOM | 159 | O4* | A A | 8 | 18.333 | -16.973 | 11.718 | 0.00nan0x7fffffff |
| ATOM | 160 | O2* | A A | 8 | 18.649 | -18.271 | 8.915  | 0.00nan0x7fffffff |
| ATOM | 161 | C2* | A A | 8 | 18.595 | -16.926 | 9.368  | 0.00nan0x7fffffff |
| ATOM | 162 | C1* | A A | 8 | 17.614 | -16.775 | 10.524 | 0.00nan0x7fffffff |
| ATOM | 163 | N9  | A A | 8 | 17.023 | -15.422 | 10.443 | 0.00nan0x7fffffff |
| ATOM | 164 | C8  | A A | 8 | 17.508 | -14.255 | 10.973 | 0.00nan0x7fffffff |
| ATOM | 165 | N7  | A A | 8 | 16.769 | -13.207 | 10.708 | 0.00nan0x7fffffff |
| ATOM | 166 | C5  | A A | 8 | 15.728 | -13.722 | 9.942  | 0.00nan0x7fffffff |
| ATOM | 167 | N6  | A A | 8 | 14.342 | -11.800 | 9.433  | 0.00nan0x7fffffff |
| ATOM | 168 | C6  | A A | 8 | 14.604 | -13.097 | 9.348  | 0.00nan0x7fffffff |
| ATOM | 169 | N1  | A A | 8 | 13.776 | -13.936 | 8.656  | 0.00nan0x7fffffff |
| ATOM | 170 | C2  | A A | 8 | 14.029 | -15.269 | 8.554  | 0.00nan0x7fffffff |
| ATOM | 171 | N3  | A A | 8 | 15.063 | -15.916 | 9.088  | 0.00nan0x7fffffff |
| ATOM | 172 | C4  | A A | 8 | 15.874 | -15.082 | 9.769  | 0.00nan0x7fffffff |
| ATOM | 173 | O3* | A A | 8 | 21.051 | -17.134 | 9.318  | 0.00nan0x7fffffff |
| ATOM | 174 | P   | A A | 9 | 22.150 | -16.194 | 8.598  | 0.00nan0x7fffffff |
| ATOM | 175 | O1P | A A | 9 | 23.440 | -16.787 | 9.039  | 0.00nan0x7fffffff |
| ATOM | 176 | O2P | A A | 9 | 22.001 | -14.772 | 9.049  | 0.00nan0x7fffffff |
| ATOM | 177 | O5* | A A | 9 | 21.860 | -16.338 | 7.035  | 0.00nan0x7fffffff |
| ATOM | 178 | C5* | A A | 9 | 22.959 | -16.452 | 6.091  | 0.00nan0x7fffffff |
| ATOM | 179 | C4* | A A | 9 | 22.464 | -15.979 | 4.745  | 0.00nan0x7fffffff |
| ATOM | 180 | C3* | A A | 9 | 21.389 | -14.903 | 4.772  | 0.00nan0x7fffffff |
| ATOM | 181 | O4* | A A | 9 | 21.847 | -17.087 | 4.054  | 0.00nan0x7fffffff |
| ATOM | 182 | O2* | A A | 9 | 21.490 | -14.439 | 2.446  | 0.00nan0x7fffffff |
| ATOM | 183 | C2* | A A | 9 | 20.706 | -15.111 | 3.421  | 0.00nan0x7fffffff |
| ATOM | 184 | C1* | A A | 9 | 20.789 | -16.621 | 3.249  | 0.00nan0x7fffffff |
| ATOM | 185 | N9  | A A | 9 | 19.491 | -17.223 | 3.614  | 0.00nan0x7fffffff |
| ATOM | 186 | C8  | A A | 9 | 19.232 | -18.136 | 4.603  | 0.00nan0x7fffffff |
| ATOM | 187 | N7  | A A | 9 | 17.980 | -18.517 | 4.658  | 0.00nan0x7fffffff |
| ATOM | 188 | C5  | A A | 9 | 17.378 | -17.819 | 3.615  | 0.00nan0x7fffffff |
| ATOM | 189 | N6  | A A | 9 | 15.055 | -18.504 | 3.690  | 0.00nan0x7fffffff |
| ATOM | 190 | C6  | A A | 9 | 16.045 | -17.816 | 3.138  | 0.00nan0x7fffffff |
| ATOM | 191 | N1  | A A | 9 | 15.811 | -16.976 | 2.084  | 0.00nan0x7fffffff |

|      |     |     |     |    |        |         |       |                   |
|------|-----|-----|-----|----|--------|---------|-------|-------------------|
| ATOM | 192 | C2  | A A | 9  | 16.807 | -16.243 | 1.518 | 0.00nan0x7fffffff |
| ATOM | 193 | N3  | A A | 9  | 18.081 | -16.216 | 1.906 | 0.00nan0x7fffffff |
| ATOM | 194 | C4  | A A | 9  | 18.298 | -17.031 | 2.958 | 0.00nan0x7fffffff |
| ATOM | 195 | O3* | A A | 9  | 21.914 | -13.580 | 4.920 | 0.00nan0x7fffffff |
| ATOM | 196 | P   | U A | 10 | 21.246 | -12.467 | 5.866 | 0.00nan0x7fffffff |
| ATOM | 197 | O1P | U A | 10 | 22.403 | -11.626 | 6.276 | 0.00nan0x7fffffff |
| ATOM | 198 | O2P | U A | 10 | 20.572 | -13.103 | 7.045 | 0.00nan0x7fffffff |
| ATOM | 199 | O5* | U A | 10 | 20.197 | -11.728 | 4.925 | 0.00nan0x7fffffff |
| ATOM | 200 | C5* | U A | 10 | 20.617 | -10.773 | 3.916 | 0.00nan0x7fffffff |
| ATOM | 201 | C4* | U A | 10 | 19.470 | -10.647 | 2.936 | 0.00nan0x7fffffff |
| ATOM | 202 | C3* | U A | 10 | 18.130 | -10.262 | 3.543 | 0.00nan0x7fffffff |
| ATOM | 203 | O4* | U A | 10 | 19.236 | -11.948 | 2.349 | 0.00nan0x7fffffff |
| ATOM | 204 | O2* | U A | 10 | 17.052 | -9.933  | 1.453 | 0.00nan0x7fffffff |
| ATOM | 205 | C2* | U A | 10 | 17.148 | -10.851 | 2.532 | 0.00nan0x7fffffff |
| ATOM | 206 | C1* | U A | 10 | 17.860 | -12.129 | 2.106 | 0.00nan0x7fffffff |
| ATOM | 207 | N1  | U A | 10 | 17.313 | -13.239 | 2.921 | 0.00nan0x7fffffff |
| ATOM | 208 | C6  | U A | 10 | 18.023 | -13.812 | 3.934 | 0.00nan0x7fffffff |
| ATOM | 209 | C5  | U A | 10 | 17.524 | -14.799 | 4.693 | 0.00nan0x7fffffff |
| ATOM | 210 | O4  | U A | 10 | 15.613 | -16.150 | 5.072 | 0.00nan0x7fffffff |
| ATOM | 211 | C4  | U A | 10 | 16.193 | -15.230 | 4.425 | 0.00nan0x7fffffff |
| ATOM | 212 | N3  | U A | 10 | 15.495 | -14.646 | 3.410 | 0.00nan0x7fffffff |
| ATOM | 213 | O2  | U A | 10 | 15.372 | -13.120 | 1.740 | 0.00nan0x7fffffff |
| ATOM | 214 | C2  | U A | 10 | 16.017 | -13.641 | 2.647 | 0.00nan0x7fffffff |
| ATOM | 215 | O3* | U A | 10 | 17.952 | -8.856  | 3.729 | 0.00nan0x7fffffff |
| ATOM | 216 | P   | U A | 11 | 17.297 | -8.245  | 5.072 | 0.00nan0x7fffffff |
| ATOM | 217 | O1P | U A | 11 | 18.211 | -7.121  | 5.408 | 0.00nan0x7fffffff |
| ATOM | 218 | O2P | U A | 11 | 17.260 | -9.281  | 6.155 | 0.00nan0x7fffffff |
| ATOM | 219 | O5* | U A | 11 | 15.833 | -7.802  | 4.636 | 0.00nan0x7fffffff |
| ATOM | 220 | C5* | U A | 11 | 15.448 | -6.404  | 4.643 | 0.00nan0x7fffffff |
| ATOM | 221 | C4* | U A | 11 | 14.182 | -6.282  | 3.829 | 0.00nan0x7fffffff |
| ATOM | 222 | C3* | U A | 11 | 12.900 | -6.734  | 4.504 | 0.00nan0x7fffffff |
| ATOM | 223 | O4* | U A | 11 | 14.292 | -7.138  | 2.668 | 0.00nan0x7fffffff |
| ATOM | 224 | O2* | U A | 11 | 11.470 | -5.855  | 2.825 | 0.00nan0x7fffffff |
| ATOM | 225 | C2* | U A | 11 | 12.014 | -7.074  | 3.308 | 0.00nan0x7fffffff |
| ATOM | 226 | C1* | U A | 11 | 13.026 | -7.653  | 2.327 | 0.00nan0x7fffffff |
| ATOM | 227 | N1  | U A | 11 | 12.987 | -9.127  | 2.464 | 0.00nan0x7fffffff |
| ATOM | 228 | C6  | U A | 11 | 13.985 | -9.828  | 3.074 | 0.00nan0x7fffffff |
| ATOM | 229 | C5  | U A | 11 | 13.944 | -11.161 | 3.215 | 0.00nan0x7fffffff |
| ATOM | 230 | O4  | U A | 11 | 12.644 | -13.099 | 2.788 | 0.00nan0x7fffffff |
| ATOM | 231 | C4  | U A | 11 | 12.811 | -11.847 | 2.693 | 0.00nan0x7fffffff |
| ATOM | 232 | N3  | U A | 11 | 11.802 | -11.128 | 2.120 | 0.00nan0x7fffffff |
| ATOM | 233 | O2  | U A | 11 | 10.953 | -9.141  | 1.444 | 0.00nan0x7fffffff |
| ATOM | 234 | C2  | U A | 11 | 11.861 | -9.771  | 1.981 | 0.00nan0x7fffffff |
| ATOM | 235 | O3* | U A | 11 | 12.321 | -5.735  | 5.349 | 0.00nan0x7fffffff |
| ATOM | 236 | P   | G A | 12 | 11.413 | -6.214  | 6.587 | 0.00nan0x7fffffff |
| ATOM | 237 | O1P | G A | 12 | 10.747 | -4.961  | 7.029 | 0.00nan0x7fffffff |
| ATOM | 238 | O2P | G A | 12 | 12.255 | -6.819  | 7.668 | 0.00nan0x7fffffff |
| ATOM | 239 | O5* | G A | 12 | 10.427 | -7.293  | 5.944 | 0.00nan0x7fffffff |
| ATOM | 240 | C5* | G A | 12 | 9.294  | -6.846  | 5.156 | 0.00nan0x7fffffff |
| ATOM | 241 | C4* | G A | 12 | 8.748  | -8.052  | 4.432 | 0.00nan0x7fffffff |
| ATOM | 242 | C3* | G A | 12 | 8.084  | -9.115  | 5.295 | 0.00nan0x7fffffff |
| ATOM | 243 | O4* | G A | 12 | 9.832  | -8.749  | 3.781 | 0.00nan0x7fffffff |
| ATOM | 244 | O2* | G A | 12 | 7.167  | -10.301 | 3.449 | 0.00nan0x7fffffff |
| ATOM | 245 | C2* | G A | 12 | 8.211  | -10.351 | 4.412 | 0.00nan0x7fffffff |
| ATOM | 246 | C1* | G A | 12 | 9.565  | -10.133 | 3.749 | 0.00nan0x7fffffff |
| ATOM | 247 | N9  | G A | 12 | 10.591 | -10.909 | 4.473 | 0.00nan0x7fffffff |
| ATOM | 248 | C8  | G A | 12 | 11.694 | -10.425 | 5.129 | 0.00nan0x7fffffff |
| ATOM | 249 | N7  | G A | 12 | 12.444 | -11.358 | 5.660 | 0.00nan0x7fffffff |
| ATOM | 250 | C5  | G A | 12 | 11.800 | -12.542 | 5.308 | 0.00nan0x7fffffff |
| ATOM | 251 | O6  | G A | 12 | 13.076 | -14.332 | 6.225 | 0.00nan0x7fffffff |
| ATOM | 252 | C6  | G A | 12 | 12.126 | -13.899 | 5.568 | 0.00nan0x7fffffff |
| ATOM | 253 | N1  | G A | 12 | 11.223 | -14.801 | 5.064 | 0.00nan0x7fffffff |
| ATOM | 254 | N2  | G A | 12 | 9.362  | -15.426 | 3.911 | 0.00nan0x7fffffff |
| ATOM | 255 | C2  | G A | 12 | 10.135 | -14.420 | 4.342 | 0.00nan0x7fffffff |

|      |     |     |     |    |        |         |        |                   |
|------|-----|-----|-----|----|--------|---------|--------|-------------------|
| ATOM | 256 | N3  | G A | 12 | 9.788  | -13.164 | 4.061  | 0.00nan0x7fffffff |
| ATOM | 257 | C4  | G A | 12 | 10.666 | -12.278 | 4.570  | 0.00nan0x7fffffff |
| ATOM | 258 | O3* | G A | 12 | 6.753  | -8.763  | 5.655  | 0.00nan0x7fffffff |
| ATOM | 259 | P   | U A | 13 | 5.446  | -9.628  | 5.797  | 0.00nan0x7fffffff |
| ATOM | 260 | O1P | U A | 13 | 4.615  | -9.234  | 4.618  | 0.00nan0x7fffffff |
| ATOM | 261 | O2P | U A | 13 | 4.714  | -9.330  | 7.081  | 0.00nan0x7fffffff |
| ATOM | 262 | O5* | U A | 13 | 5.911  | -11.152 | 5.764  | 0.00nan0x7fffffff |
| ATOM | 263 | C5* | U A | 13 | 4.941  | -12.192 | 5.475  | 0.00nan0x7fffffff |
| ATOM | 264 | C4* | U A | 13 | 5.615  | -13.514 | 5.757  | 0.00nan0x7fffffff |
| ATOM | 265 | C3* | U A | 13 | 5.768  | -13.892 | 7.218  | 0.00nan0x7fffffff |
| ATOM | 266 | O4* | U A | 13 | 6.973  | -13.456 | 5.260  | 0.00nan0x7fffffff |
| ATOM | 267 | O2* | U A | 13 | 6.474  | -16.119 | 6.787  | 0.00nan0x7fffffff |
| ATOM | 268 | C2* | U A | 13 | 6.962  | -14.844 | 7.179  | 0.00nan0x7fffffff |
| ATOM | 269 | C1* | U A | 13 | 7.820  | -14.222 | 6.085  | 0.00nan0x7fffffff |
| ATOM | 270 | N1  | U A | 13 | 8.859  | -13.388 | 6.730  | 0.00nan0x7fffffff |
| ATOM | 271 | C6  | U A | 13 | 8.797  | -12.025 | 6.746  | 0.00nan0x7fffffff |
| ATOM | 272 | C5  | U A | 13 | 9.751  | -11.268 | 7.308  | 0.00nan0x7fffffff |
| ATOM | 273 | O4  | U A | 13 | 11.785 | -11.332 | 8.527  | 0.00nan0x7fffffff |
| ATOM | 274 | C4  | U A | 13 | 10.830 | -11.935 | 7.956  | 0.00nan0x7fffffff |
| ATOM | 275 | N3  | U A | 13 | 10.877 | -13.298 | 7.936  | 0.00nan0x7fffffff |
| ATOM | 276 | O2  | U A | 13 | 9.963  | -15.282 | 7.341  | 0.00nan0x7fffffff |
| ATOM | 277 | C2  | U A | 13 | 9.899  | -14.055 | 7.356  | 0.00nan0x7fffffff |
| ATOM | 278 | O3* | U A | 13 | 4.591  | -14.510 | 7.750  | 0.00nan0x7fffffff |
| ATOM | 279 | P   | U A | 14 | 4.400  | -14.537 | 9.339  | 0.00nan0x7fffffff |
| ATOM | 280 | O1P | U A | 14 | 2.931  | -14.398 | 9.521  | 0.00nan0x7fffffff |
| ATOM | 281 | O2P | U A | 14 | 5.160  | -13.427 | 9.999  | 0.00nan0x7fffffff |
| ATOM | 282 | O5* | U A | 14 | 4.981  | -15.966 | 9.766  | 0.00nan0x7fffffff |
| ATOM | 283 | C5* | U A | 14 | 4.792  | -17.101 | 8.883  | 0.00nan0x7fffffff |
| ATOM | 284 | C4* | U A | 14 | 5.751  | -18.180 | 9.321  | 0.00nan0x7fffffff |
| ATOM | 285 | C3* | U A | 14 | 6.033  | -18.275 | 10.811 | 0.00nan0x7fffffff |
| ATOM | 286 | O4* | U A | 14 | 7.047  | -17.929 | 8.731  | 0.00nan0x7fffffff |
| ATOM | 287 | O2* | U A | 14 | 7.156  | -20.362 | 10.665 | 0.00nan0x7fffffff |
| ATOM | 288 | C2* | U A | 14 | 7.392  | -18.971 | 10.827 | 0.00nan0x7fffffff |
| ATOM | 289 | C1* | U A | 14 | 8.064  | -18.379 | 9.594  | 0.00nan0x7fffffff |
| ATOM | 290 | N1  | U A | 14 | 8.957  | -17.285 | 10.037 | 0.00nan0x7fffffff |
| ATOM | 291 | C6  | U A | 14 | 8.738  | -15.981 | 9.706  | 0.00nan0x7fffffff |
| ATOM | 292 | C5  | U A | 14 | 9.546  | -14.990 | 10.113 | 0.00nan0x7fffffff |
| ATOM | 293 | O4  | U A | 14 | 11.501 | -14.496 | 11.362 | 0.00nan0x7fffffff |
| ATOM | 294 | C4  | U A | 14 | 10.668 | -15.339 | 10.918 | 0.00nan0x7fffffff |
| ATOM | 295 | N3  | U A | 14 | 10.874 | -16.647 | 11.243 | 0.00nan0x7fffffff |
| ATOM | 296 | O2  | U A | 14 | 10.243 | -18.818 | 11.124 | 0.00nan0x7fffffff |
| ATOM | 297 | C2  | U A | 14 | 10.041 | -17.644 | 10.822 | 0.00nan0x7fffffff |
| ATOM | 298 | O3* | U A | 14 | 5.037  | -18.996 | 11.540 | 0.00nan0x7fffffff |
| ATOM | 299 | P   | G A | 15 | 4.603  | -18.534 | 13.022 | 0.00nan0x7fffffff |
| ATOM | 300 | O1P | G A | 15 | 3.471  | -19.443 | 13.343 | 0.00nan0x7fffffff |
| ATOM | 301 | O2P | G A | 15 | 4.188  | -17.094 | 13.027 | 0.00nan0x7fffffff |
| ATOM | 302 | O5* | G A | 15 | 5.910  | -18.768 | 13.899 | 0.00nan0x7fffffff |
| ATOM | 303 | C5* | G A | 15 | 6.310  | -20.118 | 14.251 | 0.00nan0x7fffffff |
| ATOM | 304 | C4* | G A | 15 | 7.532  | -19.995 | 15.128 | 0.00nan0x7fffffff |
| ATOM | 305 | C3* | G A | 15 | 7.406  | -19.081 | 16.335 | 0.00nan0x7fffffff |
| ATOM | 306 | O4* | G A | 15 | 8.609  | -19.417 | 14.356 | 0.00nan0x7fffffff |
| ATOM | 307 | O2* | G A | 15 | 9.445  | -19.780 | 17.331 | 0.00nan0x7fffffff |
| ATOM | 308 | C2* | G A | 15 | 8.864  | -18.711 | 16.600 | 0.00nan0x7fffffff |
| ATOM | 309 | C1* | G A | 15 | 9.432  | -18.635 | 15.190 | 0.00nan0x7fffffff |
| ATOM | 310 | N9  | G A | 15 | 9.471  | -17.217 | 14.777 | 0.00nan0x7fffffff |
| ATOM | 311 | C8  | G A | 15 | 8.708  | -16.591 | 13.828 | 0.00nan0x7fffffff |
| ATOM | 312 | N7  | G A | 15 | 8.984  | -15.320 | 13.683 | 0.00nan0x7fffffff |
| ATOM | 313 | C5  | G A | 15 | 10.006 | -15.094 | 14.601 | 0.00nan0x7fffffff |
| ATOM | 314 | O6  | G A | 15 | 10.605 | -12.795 | 14.436 | 0.00nan0x7fffffff |
| ATOM | 315 | C6  | G A | 15 | 10.734 | -13.919 | 14.926 | 0.00nan0x7fffffff |
| ATOM | 316 | N1  | G A | 15 | 11.681 | -14.094 | 15.903 | 0.00nan0x7fffffff |
| ATOM | 317 | N2  | G A | 15 | 12.859 | -15.296 | 17.437 | 0.00nan0x7fffffff |
| ATOM | 318 | C2  | G A | 15 | 11.899 | -15.296 | 16.504 | 0.00nan0x7fffffff |
| ATOM | 319 | N3  | G A | 15 | 11.246 | -16.426 | 16.238 | 0.00nan0x7fffffff |

|      |     |     |     |    |        |         |        |                   |
|------|-----|-----|-----|----|--------|---------|--------|-------------------|
| ATOM | 320 | C4  | G A | 15 | 10.315 | -16.253 | 15.279 | 0.00nan0x7fffffff |
| ATOM | 321 | O3* | G A | 15 | 6.784  | -19.705 | 17.461 | 0.00nan0x7fffffff |
| ATOM | 322 | P   | G A | 16 | 5.806  | -18.871 | 18.430 | 0.00nan0x7fffffff |
| ATOM | 323 | O1P | G A | 16 | 4.846  | -19.898 | 18.914 | 0.00nan0x7fffffff |
| ATOM | 324 | O2P | G A | 16 | 5.123  | -17.769 | 17.679 | 0.00nan0x7fffffff |
| ATOM | 325 | O5* | G A | 16 | 6.779  | -18.295 | 19.554 | 0.00nan0x7fffffff |
| ATOM | 326 | C5* | G A | 16 | 7.722  | -19.172 | 20.222 | 0.00nan0x7fffffff |
| ATOM | 327 | C4* | G A | 16 | 8.724  | -18.291 | 20.927 | 0.00nan0x7fffffff |
| ATOM | 328 | C3* | G A | 16 | 8.161  | -17.086 | 21.660 | 0.00nan0x7fffffff |
| ATOM | 329 | O4* | G A | 16 | 9.621  | -17.722 | 19.946 | 0.00nan0x7fffffff |
| ATOM | 330 | O2* | G A | 16 | 10.190 | -16.559 | 22.775 | 0.00nan0x7fffffff |
| ATOM | 331 | C2* | G A | 16 | 9.366  | -16.148 | 21.694 | 0.00nan0x7fffffff |
| ATOM | 332 | C1* | G A | 16 | 10.029 | -16.438 | 20.355 | 0.00nan0x7fffffff |
| ATOM | 333 | N9  | G A | 16 | 9.626  | -15.387 | 19.397 | 0.00nan0x7fffffff |
| ATOM | 334 | C8  | G A | 16 | 8.804  | -15.506 | 18.308 | 0.00nan0x7fffffff |
| ATOM | 335 | N7  | G A | 16 | 8.642  | -14.390 | 17.644 | 0.00nan0x7fffffff |
| ATOM | 336 | C5  | G A | 16 | 9.417  | -13.470 | 18.346 | 0.00nan0x7fffffff |
| ATOM | 337 | O6  | G A | 16 | 9.206  | -11.377 | 17.230 | 0.00nan0x7fffffff |
| ATOM | 338 | C6  | G A | 16 | 9.658  | -12.088 | 18.131 | 0.00nan0x7fffffff |
| ATOM | 339 | N1  | G A | 16 | 10.494 | -11.511 | 19.053 | 0.00nan0x7fffffff |
| ATOM | 340 | N2  | G A | 16 | 11.836 | -11.498 | 20.892 | 0.00nan0x7fffffff |
| ATOM | 341 | C2  | G A | 16 | 11.042 | -12.211 | 20.083 | 0.00nan0x7fffffff |
| ATOM | 342 | N3  | G A | 16 | 10.850 | -13.506 | 20.330 | 0.00nan0x7fffffff |
| ATOM | 343 | C4  | G A | 16 | 10.028 | -14.072 | 19.424 | 0.00nan0x7fffffff |
| ATOM | 344 | O3* | G A | 16 | 7.666  | -17.392 | 22.967 | 0.00nan0x7fffffff |
| ATOM | 345 | P   | C A | 17 | 6.358  | -16.657 | 23.549 | 0.00nan0x7fffffff |
| ATOM | 346 | O1P | C A | 17 | 5.760  | -17.681 | 24.446 | 0.00nan0x7fffffff |
| ATOM | 347 | O2P | C A | 17 | 5.429  | -16.265 | 22.441 | 0.00nan0x7fffffff |
| ATOM | 348 | O5* | C A | 17 | 6.940  | -15.378 | 24.301 | 0.00nan0x7fffffff |
| ATOM | 349 | C5* | C A | 17 | 8.043  | -15.517 | 25.234 | 0.00nan0x7fffffff |
| ATOM | 350 | C4* | C A | 17 | 8.603  | -14.135 | 25.468 | 0.00nan0x7fffffff |
| ATOM | 351 | C3* | C A | 17 | 7.587  | -13.022 | 25.662 | 0.00nan0x7fffffff |
| ATOM | 352 | O4* | C A | 17 | 9.354  | -13.731 | 24.300 | 0.00nan0x7fffffff |
| ATOM | 353 | O2* | C A | 17 | 9.183  | -11.412 | 26.367 | 0.00nan0x7fffffff |
| ATOM | 354 | C2* | C A | 17 | 8.390  | -11.790 | 25.251 | 0.00nan0x7fffffff |
| ATOM | 355 | C1* | C A | 17 | 9.253  | -12.337 | 24.122 | 0.00nan0x7fffffff |
| ATOM | 356 | N1  | C A | 17 | 8.617  | -11.979 | 22.835 | 0.00nan0x7fffffff |
| ATOM | 357 | C6  | C A | 17 | 8.040  | -12.908 | 22.020 | 0.00nan0x7fffffff |
| ATOM | 358 | C5  | C A | 17 | 7.467  | -12.583 | 20.850 | 0.00nan0x7fffffff |
| ATOM | 359 | N4  | C A | 17 | 6.932  | -10.802 | 19.326 | 0.00nan0x7fffffff |
| ATOM | 360 | C4  | C A | 17 | 7.480  | -11.212 | 20.474 | 0.00nan0x7fffffff |
| ATOM | 361 | N3  | C A | 17 | 8.059  | -10.291 | 21.292 | 0.00nan0x7fffffff |
| ATOM | 362 | O2  | C A | 17 | 9.158  | -9.800  | 23.210 | 0.00nan0x7fffffff |
| ATOM | 363 | C2  | C A | 17 | 8.638  | -10.640 | 22.479 | 0.00nan0x7fffffff |
| ATOM | 364 | O3* | C A | 17 | 7.087  | -12.932 | 26.999 | 0.00nan0x7fffffff |
| ATOM | 365 | P   | U A | 18 | 5.550  | -12.546 | 27.283 | 0.00nan0x7fffffff |
| ATOM | 366 | O1P | U A | 18 | 5.247  | -13.260 | 28.551 | 0.00nan0x7fffffff |
| ATOM | 367 | O2P | U A | 18 | 4.670  | -12.996 | 26.156 | 0.00nan0x7fffffff |
| ATOM | 368 | O5* | U A | 18 | 5.571  | -10.957 | 27.407 | 0.00nan0x7fffffff |
| ATOM | 369 | C5* | U A | 18 | 6.546  | -10.304 | 28.260 | 0.00nan0x7fffffff |
| ATOM | 370 | C4* | U A | 18 | 6.559  | -8.843  | 27.881 | 0.00nan0x7fffffff |
| ATOM | 371 | C3* | U A | 18 | 5.204  | -8.197  | 27.647 | 0.00nan0x7fffffff |
| ATOM | 372 | O4* | U A | 18 | 7.246  | -8.693  | 26.617 | 0.00nan0x7fffffff |
| ATOM | 373 | O2* | U A | 18 | 6.049  | -5.980  | 27.558 | 0.00nan0x7fffffff |
| ATOM | 374 | C2* | U A | 18 | 5.567  | -7.030  | 26.732 | 0.00nan0x7fffffff |
| ATOM | 375 | C1* | U A | 18 | 6.686  | -7.626  | 25.889 | 0.00nan0x7fffffff |
| ATOM | 376 | N1  | U A | 18 | 6.111  | -8.065  | 24.598 | 0.00nan0x7fffffff |
| ATOM | 377 | C6  | U A | 18 | 5.982  | -9.381  | 24.263 | 0.00nan0x7fffffff |
| ATOM | 378 | C5  | U A | 18 | 5.465  | -9.777  | 23.090 | 0.00nan0x7fffffff |
| ATOM | 379 | O4  | U A | 18 | 4.541  | -9.016  | 21.042 | 0.00nan0x7fffffff |
| ATOM | 380 | C4  | U A | 18 | 5.043  | -8.769  | 22.177 | 0.00nan0x7fffffff |
| ATOM | 381 | N3  | U A | 18 | 5.180  | -7.457  | 22.525 | 0.00nan0x7fffffff |
| ATOM | 382 | O2  | U A | 18 | 5.824  | -5.883  | 24.019 | 0.00nan0x7fffffff |
| ATOM | 383 | C2  | U A | 18 | 5.709  | -7.070  | 23.723 | 0.00nan0x7fffffff |

|      |     |     |   |   |    |         |        |        |                   |
|------|-----|-----|---|---|----|---------|--------|--------|-------------------|
| ATOM | 384 | O3* | U | A | 18 | 4.558   | -7.772 | 28.851 | 0.00nan0x7fffffff |
| ATOM | 385 | P   | A | A | 19 | 2.961   | -7.891 | 29.017 | 0.00nan0x7fffffff |
| ATOM | 386 | O1P | A | A | 19 | 2.783   | -8.083 | 30.480 | 0.00nan0x7fffffff |
| ATOM | 387 | O2P | A | A | 19 | 2.427   | -9.046 | 28.226 | 0.00nan0x7fffffff |
| ATOM | 388 | O5* | A | A | 19 | 2.414   | -6.501 | 28.461 | 0.00nan0x7fffffff |
| ATOM | 389 | C5* | A | A | 19 | 3.020   | -5.255 | 28.890 | 0.00nan0x7fffffff |
| ATOM | 390 | C4* | A | A | 19 | 2.551   | -4.182 | 27.937 | 0.00nan0x7fffffff |
| ATOM | 391 | C3* | A | A | 19 | 1.088   | -4.234 | 27.533 | 0.00nan0x7fffffff |
| ATOM | 392 | O4* | A | A | 19 | 3.270   | -4.316 | 26.690 | 0.00nan0x7fffffff |
| ATOM | 393 | O2* | A | A | 19 | 1.092   | -2.104 | 26.484 | 0.00nan0x7fffffff |
| ATOM | 394 | C2* | A | A | 19 | 1.106   | -3.495 | 26.197 | 0.00nan0x7fffffff |
| ATOM | 395 | C1* | A | A | 19 | 2.447   | -3.924 | 25.617 | 0.00nan0x7fffffff |
| ATOM | 396 | N9  | A | A | 19 | 2.210   | -5.021 | 24.656 | 0.00nan0x7fffffff |
| ATOM | 397 | C8  | A | A | 19 | 2.536   | -6.345 | 24.785 | 0.00nan0x7fffffff |
| ATOM | 398 | N7  | A | A | 19 | 2.199   | -7.076 | 23.751 | 0.00nan0x7fffffff |
| ATOM | 399 | C5  | A | A | 19 | 1.612   | -6.164 | 22.879 | 0.00nan0x7fffffff |
| ATOM | 400 | N6  | A | A | 19 | 0.976   | -7.490 | 20.953 | 0.00nan0x7fffffff |
| ATOM | 401 | C6  | A | A | 19 | 1.045   | -6.330 | 21.593 | 0.00nan0x7fffffff |
| ATOM | 402 | N1  | A | A | 19 | 0.553   | -5.188 | 21.025 | 0.00nan0x7fffffff |
| ATOM | 403 | C2  | A | A | 19 | 0.614   | -3.988 | 21.665 | 0.00nan0x7fffffff |
| ATOM | 404 | N3  | A | A | 19 | 1.132   | -3.765 | 22.871 | 0.00nan0x7fffffff |
| ATOM | 405 | C4  | A | A | 19 | 1.614   | -4.897 | 23.423 | 0.00nan0x7fffffff |
| ATOM | 406 | O3* | A | A | 19 | 0.210   | -3.628 | 28.486 | 0.00nan0x7fffffff |
| ATOM | 407 | P   | U | A | 20 | -1.251  | -4.242 | 28.767 | 0.00nan0x7fffffff |
| ATOM | 408 | O1P | U | A | 20 | -1.500  | -3.895 | 30.190 | 0.00nan0x7fffffff |
| ATOM | 409 | O2P | U | A | 20 | -1.262  | -5.722 | 28.535 | 0.00nan0x7fffffff |
| ATOM | 410 | O5* | U | A | 20 | -2.191  | -3.482 | 27.726 | 0.00nan0x7fffffff |
| ATOM | 411 | C5* | U | A | 20 | -2.105  | -2.041 | 27.586 | 0.00nan0x7fffffff |
| ATOM | 412 | C4* | U | A | 20 | -2.801  | -1.677 | 26.297 | 0.00nan0x7fffffff |
| ATOM | 413 | C3* | U | A | 20 | -4.101  | -2.406 | 26.005 | 0.00nan0x7fffffff |
| ATOM | 414 | O4* | U | A | 20 | -1.942  | -2.024 | 25.187 | 0.00nan0x7fffffff |
| ATOM | 415 | O2* | U | A | 20 | -4.707  | -1.014 | 24.180 | 0.00nan0x7fffffff |
| ATOM | 416 | C2* | U | A | 20 | -4.185  | -2.299 | 24.484 | 0.00nan0x7fffffff |
| ATOM | 417 | C1* | U | A | 20 | -2.722  | -2.410 | 24.079 | 0.00nan0x7fffffff |
| ATOM | 418 | N1  | U | A | 20 | -2.460  | -3.806 | 23.665 | 0.00nan0x7fffffff |
| ATOM | 419 | C6  | U | A | 20 | -1.695  | -4.659 | 24.405 | 0.00nan0x7fffffff |
| ATOM | 420 | C5  | U | A | 20 | -1.458  | -5.924 | 24.027 | 0.00nan0x7fffffff |
| ATOM | 421 | O4  | U | A | 20 | -1.884  | -7.539 | 22.342 | 0.00nan0x7fffffff |
| ATOM | 422 | C4  | U | A | 20 | -2.036  | -6.371 | 22.804 | 0.00nan0x7fffffff |
| ATOM | 423 | N3  | U | A | 20 | -2.798  | -5.506 | 22.074 | 0.00nan0x7fffffff |
| ATOM | 424 | O2  | U | A | 20 | -3.720  | -3.457 | 21.801 | 0.00nan0x7fffffff |
| ATOM | 425 | C2  | U | A | 20 | -3.030  | -4.221 | 22.472 | 0.00nan0x7fffffff |
| ATOM | 426 | O3* | U | A | 20 | -5.237  | -1.835 | 26.661 | 0.00nan0x7fffffff |
| ATOM | 427 | P   | A | A | 21 | -6.418  | -2.771 | 27.227 | 0.00nan0x7fffffff |
| ATOM | 428 | O1P | A | A | 21 | -6.946  | -1.997 | 28.380 | 0.00nan0x7fffffff |
| ATOM | 429 | O2P | A | A | 21 | -5.886  | -4.109 | 27.639 | 0.00nan0x7fffffff |
| ATOM | 430 | O5* | A | A | 21 | -7.427  | -2.898 | 25.998 | 0.00nan0x7fffffff |
| ATOM | 431 | C5* | A | A | 21 | -7.809  | -1.716 | 25.249 | 0.00nan0x7fffffff |
| ATOM | 432 | C4* | A | A | 21 | -8.453  | -2.191 | 23.969 | 0.00nan0x7fffffff |
| ATOM | 433 | C3* | A | A | 21 | -9.382  | -3.387 | 24.084 | 0.00nan0x7fffffff |
| ATOM | 434 | O4* | A | A | 21 | -7.419  | -2.631 | 23.059 | 0.00nan0x7fffffff |
| ATOM | 435 | O2* | A | A | 21 | -10.245 | -3.184 | 21.882 | 0.00nan0x7fffffff |
| ATOM | 436 | C2* | A | A | 21 | -9.343  | -3.951 | 22.666 | 0.00nan0x7fffffff |
| ATOM | 437 | C1* | A | A | 21 | -7.899  | -3.687 | 22.260 | 0.00nan0x7fffffff |
| ATOM | 438 | N9  | A | A | 21 | -7.129  | -4.933 | 22.448 | 0.00nan0x7fffffff |
| ATOM | 439 | C8  | A | A | 21 | -6.176  | -5.207 | 23.394 | 0.00nan0x7fffffff |
| ATOM | 440 | N7  | A | A | 21 | -5.666  | -6.410 | 23.298 | 0.00nan0x7fffffff |
| ATOM | 441 | C5  | A | A | 21 | -6.330  | -6.965 | 22.209 | 0.00nan0x7fffffff |
| ATOM | 442 | N6  | A | A | 21 | -5.406  | -9.195 | 22.006 | 0.00nan0x7fffffff |
| ATOM | 443 | C6  | A | A | 21 | -6.228  | -8.239 | 21.599 | 0.00nan0x7fffffff |
| ATOM | 444 | N1  | A | A | 21 | -7.055  | -8.435 | 20.528 | 0.00nan0x7fffffff |
| ATOM | 445 | C2  | A | A | 21 | -7.906  | -7.466 | 20.094 | 0.00nan0x7fffffff |
| ATOM | 446 | N3  | A | A | 21 | -8.050  | -6.252 | 20.621 | 0.00nan0x7fffffff |
| ATOM | 447 | C4  | A | A | 21 | -7.232  | -6.068 | 21.677 | 0.00nan0x7fffffff |

|      |     |     |     |    |         |         |        |                   |
|------|-----|-----|-----|----|---------|---------|--------|-------------------|
| ATOM | 448 | O3* | A A | 21 | -10.705 | -3.044  | 24.505 | 0.00nan0x7fffffff |
| ATOM | 449 | P   | C A | 22 | -11.541 | -4.028  | 25.466 | 0.00nan0x7fffffff |
| ATOM | 450 | O1P | C A | 22 | -12.385 | -3.097  | 26.259 | 0.00nan0x7fffffff |
| ATOM | 451 | O2P | C A | 22 | -10.623 | -4.836  | 26.331 | 0.00nan0x7fffffff |
| ATOM | 452 | O5* | C A | 22 | -12.351 | -4.954  | 24.451 | 0.00nan0x7fffffff |
| ATOM | 453 | C5* | C A | 22 | -13.020 | -4.363  | 23.307 | 0.00nan0x7fffffff |
| ATOM | 454 | C4* | C A | 22 | -13.355 | -5.487  | 22.358 | 0.00nan0x7fffffff |
| ATOM | 455 | C3* | C A | 22 | -13.839 | -6.781  | 22.989 | 0.00nan0x7fffffff |
| ATOM | 456 | O4* | C A | 22 | -12.159 | -5.868  | 21.639 | 0.00nan0x7fffffff |
| ATOM | 457 | O2* | C A | 22 | -14.528 | -7.760  | 20.938 | 0.00nan0x7fffffff |
| ATOM | 458 | C2* | C A | 22 | -13.493 | -7.804  | 21.909 | 0.00nan0x7fffffff |
| ATOM | 459 | C1* | C A | 22 | -12.190 | -7.246  | 21.352 | 0.00nan0x7fffffff |
| ATOM | 460 | N1  | C A | 22 | -11.067 | -7.979  | 21.976 | 0.00nan0x7fffffff |
| ATOM | 461 | C6  | C A | 22 | -10.236 | -7.405  | 22.893 | 0.00nan0x7fffffff |
| ATOM | 462 | C5  | C A | 22 | -9.215  | -8.070  | 23.456 | 0.00nan0x7fffffff |
| ATOM | 463 | N4  | C A | 22 | -8.025  | -10.155 | 23.572 | 0.00nan0x7fffffff |
| ATOM | 464 | C4  | C A | 22 | -9.017  | -9.420  | 23.062 | 0.00nan0x7fffffff |
| ATOM | 465 | N3  | C A | 22 | -9.849  | -9.987  | 22.145 | 0.00nan0x7fffffff |
| ATOM | 466 | O2  | C A | 22 | -11.629 | -9.816  | 20.755 | 0.00nan0x7fffffff |
| ATOM | 467 | C2  | C A | 22 | -10.884 | -9.295  | 21.582 | 0.00nan0x7fffffff |
| ATOM | 468 | O3* | C A | 22 | -15.232 | -6.773  | 23.312 | 0.00nan0x7fffffff |
| ATOM | 469 | P   | G A | 23 | -15.774 | -7.521  | 24.630 | 0.00nan0x7fffffff |
| ATOM | 470 | O1P | G A | 23 | -16.781 | -6.572  | 25.173 | 0.00nan0x7fffffff |
| ATOM | 471 | O2P | G A | 23 | -14.659 | -7.778  | 25.596 | 0.00nan0x7fffffff |
| ATOM | 472 | O5* | G A | 23 | -16.385 | -8.884  | 24.070 | 0.00nan0x7fffffff |
| ATOM | 473 | C5* | G A | 23 | -17.181 | -8.878  | 22.857 | 0.00nan0x7fffffff |
| ATOM | 474 | C4* | G A | 23 | -17.284 | -10.308 | 22.385 | 0.00nan0x7fffffff |
| ATOM | 475 | C3* | G A | 23 | -17.426 | -11.366 | 23.466 | 0.00nan0x7fffffff |
| ATOM | 476 | O4* | G A | 23 | -16.064 | -10.665 | 21.697 | 0.00nan0x7fffffff |
| ATOM | 477 | O2* | G A | 23 | -17.951 | -13.124 | 21.960 | 0.00nan0x7fffffff |
| ATOM | 478 | C2* | G A | 23 | -16.895 | -12.610 | 22.758 | 0.00nan0x7fffffff |
| ATOM | 479 | C1* | G A | 23 | -15.783 | -12.031 | 21.893 | 0.00nan0x7fffffff |
| ATOM | 480 | N9  | G A | 23 | -14.495 | -12.251 | 22.582 | 0.00nan0x7fffffff |
| ATOM | 481 | C8  | G A | 23 | -13.692 | -11.322 | 23.191 | 0.00nan0x7fffffff |
| ATOM | 482 | N7  | G A | 23 | -12.602 | -11.827 | 23.711 | 0.00nan0x7fffffff |
| ATOM | 483 | C5  | G A | 23 | -12.693 | -13.186 | 23.421 | 0.00nan0x7fffffff |
| ATOM | 484 | O6  | G A | 23 | -10.751 | -14.229 | 24.322 | 0.00nan0x7fffffff |
| ATOM | 485 | C6  | G A | 23 | -11.824 | -14.269 | 23.715 | 0.00nan0x7fffffff |
| ATOM | 486 | N1  | G A | 23 | -12.262 | -15.485 | 23.256 | 0.00nan0x7fffffff |
| ATOM | 487 | N2  | G A | 23 | -13.712 | -16.886 | 22.198 | 0.00nan0x7fffffff |
| ATOM | 488 | C2  | G A | 23 | -13.431 | -15.632 | 22.576 | 0.00nan0x7fffffff |
| ATOM | 489 | N3  | G A | 23 | -14.282 | -14.652 | 22.274 | 0.00nan0x7fffffff |
| ATOM | 490 | C4  | G A | 23 | -13.851 | -13.458 | 22.725 | 0.00nan0x7fffffff |
| ATOM | 491 | O3* | G A | 23 | -18.768 | -11.528 | 23.931 | 0.00nan0x7fffffff |
| ATOM | 492 | P   | G A | 24 | -19.068 | -11.867 | 25.476 | 0.00nan0x7fffffff |
| ATOM | 493 | O1P | G A | 24 | -20.178 | -10.942 | 25.822 | 0.00nan0x7fffffff |
| ATOM | 494 | O2P | G A | 24 | -17.853 | -11.635 | 26.320 | 0.00nan0x7fffffff |
| ATOM | 495 | O5* | G A | 24 | -19.476 | -13.410 | 25.454 | 0.00nan0x7fffffff |
| ATOM | 496 | C5* | G A | 24 | -20.337 | -13.917 | 24.402 | 0.00nan0x7fffffff |
| ATOM | 497 | C4* | G A | 24 | -20.211 | -15.421 | 24.406 | 0.00nan0x7fffffff |
| ATOM | 498 | C3* | G A | 24 | -19.949 | -16.071 | 25.754 | 0.00nan0x7fffffff |
| ATOM | 499 | O4* | G A | 24 | -19.069 | -15.798 | 23.603 | 0.00nan0x7fffffff |
| ATOM | 500 | O2* | G A | 24 | -20.327 | -18.285 | 24.985 | 0.00nan0x7fffffff |
| ATOM | 501 | C2* | G A | 24 | -19.289 | -17.385 | 25.344 | 0.00nan0x7fffffff |
| ATOM | 502 | C1* | G A | 24 | -18.479 | -16.965 | 24.125 | 0.00nan0x7fffffff |
| ATOM | 503 | N9  | G A | 24 | -17.080 | -16.748 | 24.550 | 0.00nan0x7fffffff |
| ATOM | 504 | C8  | G A | 24 | -16.418 | -15.559 | 24.705 | 0.00nan0x7fffffff |
| ATOM | 505 | N7  | G A | 24 | -15.177 | -15.693 | 25.097 | 0.00nan0x7fffffff |
| ATOM | 506 | C5  | G A | 24 | -15.009 | -17.071 | 25.206 | 0.00nan0x7fffffff |
| ATOM | 507 | O6  | G A | 24 | -12.769 | -17.453 | 25.917 | 0.00nan0x7fffffff |
| ATOM | 508 | C6  | G A | 24 | -13.887 | -17.853 | 25.586 | 0.00nan0x7fffffff |
| ATOM | 509 | N1  | G A | 24 | -14.112 | -19.206 | 25.573 | 0.00nan0x7fffffff |
| ATOM | 510 | N2  | G A | 24 | -15.363 | -21.083 | 25.262 | 0.00nan0x7fffffff |
| ATOM | 511 | C2  | G A | 24 | -15.311 | -19.746 | 25.223 | 0.00nan0x7fffffff |



|      |     |     |     |    |         |         |        |                   |
|------|-----|-----|-----|----|---------|---------|--------|-------------------|
| ATOM | 512 | N3  | G A | 24 | -16.394 | -19.059 | 24.858 | 0.00nan0x7fffffff |
| ATOM | 513 | C4  | G A | 24 | -16.172 | -17.730 | 24.872 | 0.00nan0x7fffffff |
| ATOM | 514 | O3* | G A | 24 | -21.133 | -16.269 | 26.531 | 0.00nan0x7fffffff |
| ATOM | 515 | P   | U A | 25 | -21.115 | -16.095 | 28.132 | 0.00nan0x7fffffff |
| ATOM | 516 | O1P | U A | 25 | -21.895 | -14.849 | 28.352 | 0.00nan0x7fffffff |
| ATOM | 517 | O2P | U A | 25 | -19.711 | -15.986 | 28.642 | 0.00nan0x7fffffff |
| ATOM | 518 | O5* | U A | 25 | -21.825 | -17.423 | 28.663 | 0.00nan0x7fffffff |
| ATOM | 519 | C5* | U A | 25 | -23.268 | -17.480 | 28.819 | 0.00nan0x7fffffff |
| ATOM | 520 | C4* | U A | 25 | -23.660 | -18.940 | 28.821 | 0.00nan0x7fffffff |
| ATOM | 521 | C3* | U A | 25 | -22.971 | -19.822 | 29.847 | 0.00nan0x7fffffff |
| ATOM | 522 | O4* | U A | 25 | -23.292 | -19.522 | 27.549 | 0.00nan0x7fffffff |
| ATOM | 523 | O2* | U A | 25 | -24.393 | -21.690 | 29.489 | 0.00nan0x7fffffff |
| ATOM | 524 | C2* | U A | 25 | -23.090 | -21.202 | 29.204 | 0.00nan0x7fffffff |
| ATOM | 525 | C1* | U A | 25 | -22.936 | -20.874 | 27.725 | 0.00nan0x7fffffff |
| ATOM | 526 | N1  | U A | 25 | -21.532 | -21.143 | 27.341 | 0.00nan0x7fffffff |
| ATOM | 527 | C6  | U A | 25 | -20.648 | -20.150 | 27.041 | 0.00nan0x7fffffff |
| ATOM | 528 | C5  | U A | 25 | -19.375 | -20.399 | 26.699 | 0.00nan0x7fffffff |
| ATOM | 529 | O4  | U A | 25 | -17.780 | -22.120 | 26.350 | 0.00nan0x7fffffff |
| ATOM | 530 | C4  | U A | 25 | -18.953 | -21.758 | 26.658 | 0.00nan0x7fffffff |
| ATOM | 531 | N3  | U A | 25 | -19.847 | -22.742 | 26.964 | 0.00nan0x7fffffff |
| ATOM | 532 | O2  | U A | 25 | -21.932 | -23.372 | 27.581 | 0.00nan0x7fffffff |
| ATOM | 533 | C2  | U A | 25 | -21.140 | -22.472 | 27.308 | 0.00nan0x7fffffff |
| ATOM | 534 | O3* | U A | 25 | -23.568 | -19.768 | 31.146 | 0.00nan0x7fffffff |
| ATOM | 535 | P   | U A | 26 | -22.641 | -19.896 | 32.459 | 0.00nan0x7fffffff |
| ATOM | 536 | O1P | U A | 26 | -23.231 | -18.899 | 33.394 | 0.00nan0x7fffffff |
| ATOM | 537 | O2P | U A | 26 | -21.209 | -19.594 | 32.139 | 0.00nan0x7fffffff |
| ATOM | 538 | O5* | U A | 26 | -22.828 | -21.417 | 32.910 | 0.00nan0x7fffffff |
| ATOM | 539 | C5* | U A | 26 | -24.047 | -21.807 | 33.596 | 0.00nan0x7fffffff |
| ATOM | 540 | C4* | U A | 26 | -24.098 | -23.315 | 33.605 | 0.00nan0x7fffffff |
| ATOM | 541 | C3* | U A | 26 | -22.898 | -24.033 | 34.196 | 0.00nan0x7fffffff |
| ATOM | 542 | O4* | U A | 26 | -24.161 | -23.796 | 32.243 | 0.00nan0x7fffffff |
| ATOM | 543 | O2* | U A | 26 | -23.950 | -26.161 | 34.249 | 0.00nan0x7fffffff |
| ATOM | 544 | C2* | U A | 26 | -22.991 | -25.403 | 33.529 | 0.00nan0x7fffffff |
| ATOM | 545 | C1* | U A | 26 | -23.503 | -25.038 | 32.142 | 0.00nan0x7fffffff |
| ATOM | 546 | N1  | U A | 26 | -22.338 | -24.977 | 31.230 | 0.00nan0x7fffffff |
| ATOM | 547 | C6  | U A | 26 | -21.852 | -23.798 | 30.747 | 0.00nan0x7fffffff |
| ATOM | 548 | C5  | U A | 26 | -20.787 | -23.739 | 29.933 | 0.00nan0x7fffffff |
| ATOM | 549 | O4  | U A | 26 | -19.150 | -25.041 | 28.813 | 0.00nan0x7fffffff |
| ATOM | 550 | C4  | U A | 26 | -20.158 | -24.966 | 29.574 | 0.00nan0x7fffffff |
| ATOM | 551 | N3  | U A | 26 | -20.650 | -26.137 | 30.072 | 0.00nan0x7fffffff |
| ATOM | 552 | O2  | U A | 26 | -22.163 | -27.244 | 31.344 | 0.00nan0x7fffffff |
| ATOM | 553 | C2  | U A | 26 | -21.733 | -26.180 | 30.904 | 0.00nan0x7fffffff |
| ATOM | 554 | O3* | U A | 26 | -22.927 | -24.108 | 35.624 | 0.00nan0x7fffffff |
| ATOM | 555 | P   | U A | 27 | -21.525 | -24.175 | 36.414 | 0.00nan0x7fffffff |
| ATOM | 556 | O1P | U A | 27 | -21.915 | -23.968 | 37.830 | 0.00nan0x7fffffff |
| ATOM | 557 | O2P | U A | 27 | -20.579 | -23.129 | 35.917 | 0.00nan0x7fffffff |
| ATOM | 558 | O5* | U A | 27 | -20.991 | -25.649 | 36.083 | 0.00nan0x7fffffff |
| ATOM | 559 | C5* | U A | 27 | -21.734 | -26.801 | 36.561 | 0.00nan0x7fffffff |
| ATOM | 560 | C4* | U A | 27 | -21.337 | -27.988 | 35.721 | 0.00nan0x7fffffff |
| ATOM | 561 | C3* | U A | 27 | -19.965 | -28.582 | 35.983 | 0.00nan0x7fffffff |
| ATOM | 562 | O4* | U A | 27 | -21.293 | -27.597 | 34.329 | 0.00nan0x7fffffff |
| ATOM | 563 | O2* | U A | 27 | -20.344 | -30.540 | 34.694 | 0.00nan0x7fffffff |
| ATOM | 564 | C2* | U A | 27 | -19.672 | -29.290 | 34.662 | 0.00nan0x7fffffff |
| ATOM | 565 | C1* | U A | 27 | -20.312 | -28.346 | 33.652 | 0.00nan0x7fffffff |
| ATOM | 566 | N1  | U A | 27 | -19.247 | -27.500 | 33.069 | 0.00nan0x7fffffff |
| ATOM | 567 | C6  | U A | 27 | -19.205 | -26.148 | 33.240 | 0.00nan0x7fffffff |
| ATOM | 568 | C5  | U A | 27 | -18.242 | -25.384 | 32.705 | 0.00nan0x7fffffff |
| ATOM | 569 | O4  | U A | 27 | -16.277 | -25.420 | 31.375 | 0.00nan0x7fffffff |
| ATOM | 570 | C4  | U A | 27 | -17.236 | -26.031 | 31.930 | 0.00nan0x7fffffff |
| ATOM | 571 | N3  | U A | 27 | -17.291 | -27.383 | 31.764 | 0.00nan0x7fffffff |
| ATOM | 572 | O2  | U A | 27 | -18.312 | -29.365 | 32.155 | 0.00nan0x7fffffff |
| ATOM | 573 | C2  | U A | 27 | -18.280 | -28.147 | 32.316 | 0.00nan0x7fffffff |
| ATOM | 574 | O3* | U A | 27 | -19.942 | -29.472 | 37.103 | 0.00nan0x7fffffff |
| ATOM | 575 | P   | A A | 28 | -18.597 | -29.618 | 37.972 | 0.00nan0x7fffffff |

|      |     |     |     |    |         |         |        |                   |
|------|-----|-----|-----|----|---------|---------|--------|-------------------|
| ATOM | 576 | O1P | A A | 28 | -19.091 | -30.005 | 39.317 | 0.00nan0x7fffffff |
| ATOM | 577 | O2P | A A | 28 | -17.827 | -28.334 | 37.992 | 0.00nan0x7fffffff |
| ATOM | 578 | O5* | A A | 28 | -17.789 | -30.769 | 37.208 | 0.00nan0x7fffffff |
| ATOM | 579 | C5* | A A | 28 | -18.521 | -31.757 | 36.437 | 0.00nan0x7fffffff |
| ATOM | 580 | C4* | A A | 28 | -17.537 | -32.422 | 35.506 | 0.00nan0x7fffffff |
| ATOM | 581 | C3* | A A | 28 | -16.139 | -32.651 | 36.052 | 0.00nan0x7fffffff |
| ATOM | 582 | O4* | A A | 28 | -17.333 | -31.574 | 34.353 | 0.00nan0x7fffffff |
| ATOM | 583 | O2* | A A | 28 | -15.448 | -34.049 | 34.261 | 0.00nan0x7fffffff |
| ATOM | 584 | C2* | A A | 28 | -15.311 | -32.731 | 34.772 | 0.00nan0x7fffffff |
| ATOM | 585 | C1* | A A | 28 | -16.015 | -31.718 | 33.878 | 0.00nan0x7fffffff |
| ATOM | 586 | N9  | A A | 28 | -15.255 | -30.452 | 33.918 | 0.00nan0x7fffffff |
| ATOM | 587 | C8  | A A | 28 | -15.614 | -29.266 | 34.502 | 0.00nan0x7fffffff |
| ATOM | 588 | N7  | A A | 28 | -14.724 | -28.315 | 34.359 | 0.00nan0x7fffffff |
| ATOM | 589 | C5  | A A | 28 | -13.710 | -28.920 | 33.623 | 0.00nan0x7fffffff |
| ATOM | 590 | N6  | A A | 28 | -12.046 | -27.181 | 33.340 | 0.00nan0x7fffffff |
| ATOM | 591 | C6  | A A | 28 | -12.475 | -28.421 | 33.144 | 0.00nan0x7fffffff |
| ATOM | 592 | N1  | A A | 28 | -11.719 | -29.320 | 32.444 | 0.00nan0x7fffffff |
| ATOM | 593 | C2  | A A | 28 | -12.141 | -30.597 | 32.232 | 0.00nan0x7fffffff |
| ATOM | 594 | N3  | A A | 28 | -13.287 | -31.126 | 32.654 | 0.00nan0x7fffffff |
| ATOM | 595 | C4  | A A | 28 | -14.025 | -30.232 | 33.343 | 0.00nan0x7fffffff |
| ATOM | 596 | O3* | A A | 28 | -16.032 | -33.832 | 36.853 | 0.00nan0x7fffffff |
| ATOM | 597 | P   | A A | 29 | -15.019 | -33.876 | 38.102 | 0.00nan0x7fffffff |
| ATOM | 598 | O1P | A A | 29 | -15.614 | -34.901 | 38.996 | 0.00nan0x7fffffff |
| ATOM | 599 | O2P | A A | 29 | -14.915 | -32.535 | 38.758 | 0.00nan0x7fffffff |
| ATOM | 600 | O5* | A A | 29 | -13.630 | -34.307 | 37.435 | 0.00nan0x7fffffff |
| ATOM | 601 | C5* | A A | 29 | -13.598 | -35.366 | 36.444 | 0.00nan0x7fffffff |
| ATOM | 602 | C4* | A A | 29 | -12.333 | -35.195 | 35.637 | 0.00nan0x7fffffff |
| ATOM | 603 | C3* | A A | 29 | -11.088 | -34.804 | 36.414 | 0.00nan0x7fffffff |
| ATOM | 604 | O4* | A A | 29 | -12.520 | -34.112 | 34.698 | 0.00nan0x7fffffff |
| ATOM | 605 | O2* | A A | 29 | -9.597  | -35.171 | 34.603 | 0.00nan0x7fffffff |
| ATOM | 606 | C2* | A A | 29 | -10.241 | -34.137 | 35.333 | 0.00nan0x7fffffff |
| ATOM | 607 | C1* | A A | 29 | -11.299 | -33.443 | 34.486 | 0.00nan0x7fffffff |
| ATOM | 608 | N9  | A A | 29 | -11.357 | -32.022 | 34.886 | 0.00nan0x7fffffff |
| ATOM | 609 | C8  | A A | 29 | -12.337 | -31.380 | 35.598 | 0.00nan0x7fffffff |
| ATOM | 610 | N7  | A A | 29 | -12.102 | -30.106 | 35.791 | 0.00nan0x7fffffff |
| ATOM | 611 | C5  | A A | 29 | -10.881 | -29.895 | 35.159 | 0.00nan0x7fffffff |
| ATOM | 612 | N6  | A A | 29 | -10.420 | -27.542 | 35.499 | 0.00nan0x7fffffff |
| ATOM | 613 | C6  | A A | 29 | -10.091 | -28.730 | 35.011 | 0.00nan0x7fffffff |
| ATOM | 614 | N1  | A A | 29 | -8.928  | -28.903 | 34.313 | 0.00nan0x7fffffff |
| ATOM | 615 | C2  | A A | 29 | -8.573  | -30.114 | 33.804 | 0.00nan0x7fffffff |
| ATOM | 616 | N3  | A A | 29 | -9.268  | -31.245 | 33.907 | 0.00nan0x7fffffff |
| ATOM | 617 | C4  | A A | 29 | -10.413 | -31.064 | 34.597 | 0.00nan0x7fffffff |
| ATOM | 618 | O3* | A A | 29 | -10.426 | -35.916 | 37.025 | 0.00nan0x7fffffff |
| ATOM | 619 | P   | G A | 30 | -9.700  | -35.753 | 38.452 | 0.00nan0x7fffffff |
| ATOM | 620 | O1P | G A | 30 | -9.827  | -37.102 | 39.059 | 0.00nan0x7fffffff |
| ATOM | 621 | O2P | G A | 30 | -10.367 | -34.694 | 39.274 | 0.00nan0x7fffffff |
| ATOM | 622 | O5* | G A | 30 | -8.207  | -35.338 | 38.069 | 0.00nan0x7fffffff |
| ATOM | 623 | C5* | G A | 30 | -7.589  | -35.881 | 36.873 | 0.00nan0x7fffffff |
| ATOM | 624 | C4* | G A | 30 | -6.396  | -35.014 | 36.553 | 0.00nan0x7fffffff |
| ATOM | 625 | C3* | G A | 30 | -5.612  | -34.482 | 37.741 | 0.00nan0x7fffffff |
| ATOM | 626 | O4* | G A | 30 | -6.851  | -33.825 | 35.867 | 0.00nan0x7fffffff |
| ATOM | 627 | O2* | G A | 30 | -3.797  | -33.680 | 36.438 | 0.00nan0x7fffffff |
| ATOM | 628 | C2* | G A | 30 | -4.947  | -33.243 | 37.146 | 0.00nan0x7fffffff |
| ATOM | 629 | C1* | G A | 30 | -6.021  | -32.735 | 36.193 | 0.00nan0x7fffffff |
| ATOM | 630 | N9  | G A | 30 | -6.759  | -31.645 | 36.866 | 0.00nan0x7fffffff |
| ATOM | 631 | C8  | G A | 30 | -8.032  | -31.673 | 37.371 | 0.00nan0x7fffffff |
| ATOM | 632 | N7  | G A | 30 | -8.408  | -30.543 | 37.915 | 0.00nan0x7fffffff |
| ATOM | 633 | C5  | G A | 30 | -7.301  | -29.712 | 37.756 | 0.00nan0x7fffffff |
| ATOM | 634 | O6  | G A | 30 | -7.861  | -27.605 | 38.712 | 0.00nan0x7fffffff |
| ATOM | 635 | C6  | G A | 30 | -7.079  | -28.362 | 38.133 | 0.00nan0x7fffffff |
| ATOM | 636 | N1  | G A | 30 | -5.839  | -27.879 | 37.799 | 0.00nan0x7fffffff |
| ATOM | 637 | N2  | G A | 30 | -3.749  | -28.014 | 36.907 | 0.00nan0x7fffffff |
| ATOM | 638 | C2  | G A | 30 | -4.907  | -28.637 | 37.160 | 0.00nan0x7fffffff |
| ATOM | 639 | N3  | G A | 30 | -5.064  | -29.906 | 36.783 | 0.00nan0x7fffffff |

|      |     |     |     |    |        |         |        |                   |
|------|-----|-----|-----|----|--------|---------|--------|-------------------|
| ATOM | 640 | C4  | G A | 30 | -6.282 | -30.379 | 37.112 | 0.00nan0x7fffffff |
| ATOM | 641 | O3* | G A | 30 | -4.667 | -35.416 | 38.268 | 0.00nan0x7fffffff |
| ATOM | 642 | P   | U A | 31 | -4.399 | -35.519 | 39.853 | 0.00nan0x7fffffff |
| ATOM | 643 | O1P | U A | 31 | -4.173 | -36.971 | 40.069 | 0.00nan0x7fffffff |
| ATOM | 644 | O2P | U A | 31 | -5.573 | -35.004 | 40.627 | 0.00nan0x7fffffff |
| ATOM | 645 | O5* | U A | 31 | -3.107 | -34.608 | 40.080 | 0.00nan0x7fffffff |
| ATOM | 646 | C5* | U A | 31 | -1.831 | -34.979 | 39.501 | 0.00nan0x7fffffff |
| ATOM | 647 | C4* | U A | 31 | -0.983 | -33.732 | 39.429 | 0.00nan0x7fffffff |
| ATOM | 648 | C3* | U A | 31 | -0.387 | -33.238 | 40.731 | 0.00nan0x7fffffff |
| ATOM | 649 | O4* | U A | 31 | -1.805 | -32.632 | 38.973 | 0.00nan0x7fffffff |
| ATOM | 650 | O2* | U A | 31 | 1.052  | -31.655 | 39.705 | 0.00nan0x7fffffff |
| ATOM | 651 | C2* | U A | 31 | -0.163 | -31.757 | 40.433 | 0.00nan0x7fffffff |
| ATOM | 652 | C1* | U A | 31 | -1.359 | -31.428 | 39.551 | 0.00nan0x7fffffff |
| ATOM | 653 | N1  | U A | 31 | -2.398 | -30.780 | 40.380 | 0.00nan0x7fffffff |
| ATOM | 654 | C6  | U A | 31 | -3.682 | -31.240 | 40.436 | 0.00nan0x7fffffff |
| ATOM | 655 | C5  | U A | 31 | -4.630 | -30.643 | 41.174 | 0.00nan0x7fffffff |
| ATOM | 656 | O4  | U A | 31 | -5.065 | -28.829 | 42.641 | 0.00nan0x7fffffff |
| ATOM | 657 | C4  | U A | 31 | -4.262 | -29.479 | 41.910 | 0.00nan0x7fffffff |
| ATOM | 658 | N3  | U A | 31 | -2.979 | -29.024 | 41.836 | 0.00nan0x7fffffff |
| ATOM | 659 | O2  | U A | 31 | -0.874 | -29.218 | 41.026 | 0.00nan0x7fffffff |
| ATOM | 660 | C2  | U A | 31 | -2.027 | -29.640 | 41.076 | 0.00nan0x7fffffff |
| ATOM | 661 | O3* | U A | 31 | 0.825  | -33.925 | 41.060 | 0.00nan0x7fffffff |
| ATOM | 662 | P   | G A | 32 | 1.507  | -33.627 | 42.469 | 0.00nan0x7fffffff |
| ATOM | 663 | O1P | G A | 32 | 1.667  | -34.976 | 43.080 | 0.00nan0x7fffffff |
| ATOM | 664 | O2P | G A | 32 | 0.646  | -32.735 | 43.317 | 0.00nan0x7fffffff |
| ATOM | 665 | O5* | G A | 32 | 2.886  | -32.911 | 42.105 | 0.00nan0x7fffffff |
| ATOM | 666 | C5* | G A | 32 | 4.073  | -33.722 | 41.913 | 0.00nan0x7fffffff |
| ATOM | 667 | C4* | G A | 32 | 5.210  | -32.778 | 41.613 | 0.00nan0x7fffffff |
| ATOM | 668 | C3* | G A | 32 | 5.300  | -31.526 | 42.467 | 0.00nan0x7fffffff |
| ATOM | 669 | O4* | G A | 32 | 5.068  | -32.277 | 40.264 | 0.00nan0x7fffffff |
| ATOM | 670 | O2* | G A | 32 | 7.468  | -30.922 | 41.710 | 0.00nan0x7fffffff |
| ATOM | 671 | C2* | G A | 32 | 6.095  | -30.587 | 41.563 | 0.00nan0x7fffffff |
| ATOM | 672 | C1* | G A | 32 | 5.580  | -30.968 | 40.181 | 0.00nan0x7fffffff |
| ATOM | 673 | N9  | G A | 32 | 4.558  | -29.981 | 39.777 | 0.00nan0x7fffffff |
| ATOM | 674 | C8  | G A | 32 | 3.206  | -30.164 | 39.660 | 0.00nan0x7fffffff |
| ATOM | 675 | N7  | G A | 32 | 2.559  | -29.093 | 39.274 | 0.00nan0x7fffffff |
| ATOM | 676 | C5  | G A | 32 | 3.560  | -28.136 | 39.125 | 0.00nan0x7fffffff |
| ATOM | 677 | O6  | G A | 32 | 2.506  | -26.121 | 38.421 | 0.00nan0x7fffffff |
| ATOM | 678 | C6  | G A | 32 | 3.505  | -26.774 | 38.730 | 0.00nan0x7fffffff |
| ATOM | 679 | N1  | G A | 32 | 4.724  | -26.145 | 38.702 | 0.00nan0x7fffffff |
| ATOM | 680 | N2  | G A | 32 | 6.984  | -26.022 | 38.947 | 0.00nan0x7fffffff |
| ATOM | 681 | C2  | G A | 32 | 5.883  | -26.779 | 39.027 | 0.00nan0x7fffffff |
| ATOM | 682 | N3  | G A | 32 | 5.990  | -28.053 | 39.403 | 0.00nan0x7fffffff |
| ATOM | 683 | C4  | G A | 32 | 4.793  | -28.671 | 39.431 | 0.00nan0x7fffffff |
| ATOM | 684 | O3* | G A | 32 | 5.937  | -31.741 | 43.730 | 0.00nan0x7fffffff |
| ATOM | 685 | P   | G A | 33 | 5.448  | -30.945 | 45.040 | 0.00nan0x7fffffff |
| ATOM | 686 | O1P | G A | 33 | 5.869  | -31.832 | 46.157 | 0.00nan0x7fffffff |
| ATOM | 687 | O2P | G A | 33 | 3.964  | -30.736 | 45.014 | 0.00nan0x7fffffff |
| ATOM | 688 | O5* | G A | 33 | 6.233  | -29.560 | 44.965 | 0.00nan0x7fffffff |
| ATOM | 689 | C5* | G A | 33 | 7.677  | -29.549 | 44.832 | 0.00nan0x7fffffff |
| ATOM | 690 | C4* | G A | 33 | 8.076  | -28.140 | 44.465 | 0.00nan0x7fffffff |
| ATOM | 691 | C3* | G A | 33 | 7.445  | -27.027 | 45.284 | 0.00nan0x7fffffff |
| ATOM | 692 | O4* | G A | 33 | 7.649  | -27.870 | 43.110 | 0.00nan0x7fffffff |
| ATOM | 693 | O2* | G A | 33 | 8.853  | -25.319 | 44.424 | 0.00nan0x7fffffff |
| ATOM | 694 | C2* | G A | 33 | 7.537  | -25.842 | 44.324 | 0.00nan0x7fffffff |
| ATOM | 695 | C1* | G A | 33 | 7.310  | -26.510 | 42.975 | 0.00nan0x7fffffff |
| ATOM | 696 | N9  | G A | 33 | 5.897  | -26.316 | 42.589 | 0.00nan0x7fffffff |
| ATOM | 697 | C8  | G A | 33 | 4.909  | -27.261 | 42.498 | 0.00nan0x7fffffff |
| ATOM | 698 | N7  | G A | 33 | 3.752  | -26.781 | 42.120 | 0.00nan0x7fffffff |
| ATOM | 699 | C5  | G A | 33 | 3.998  | -25.420 | 41.946 | 0.00nan0x7fffffff |
| ATOM | 700 | O6  | G A | 33 | 1.951  | -24.420 | 41.251 | 0.00nan0x7fffffff |
| ATOM | 701 | C6  | G A | 33 | 3.147  | -24.357 | 41.545 | 0.00nan0x7fffffff |
| ATOM | 702 | N1  | G A | 33 | 3.763  | -23.132 | 41.490 | 0.00nan0x7fffffff |
| ATOM | 703 | N2  | G A | 33 | 5.523  | -21.702 | 41.690 | 0.00nan0x7fffffff |

|      |     |     |     |    |        |         |        |                   |
|------|-----|-----|-----|----|--------|---------|--------|-------------------|
| ATOM | 704 | C2  | G A | 33 | 5.078  | -22.960 | 41.795 | 0.00nan0x7fffffff |
| ATOM | 705 | N3  | G A | 33 | 5.919  | -23.922 | 42.175 | 0.00nan0x7fffffff |
| ATOM | 706 | C4  | G A | 33 | 5.313  | -25.124 | 42.230 | 0.00nan0x7fffffff |
| ATOM | 707 | O3* | G A | 33 | 8.113  | -26.781 | 46.524 | 0.00nan0x7fffffff |
| ATOM | 708 | P   | G A | 34 | 7.288  | -26.393 | 47.850 | 0.00nan0x7fffffff |
| ATOM | 709 | O1P | G A | 34 | 8.134  | -26.928 | 48.949 | 0.00nan0x7fffffff |
| ATOM | 710 | O2P | G A | 34 | 5.926  | -27.017 | 47.831 | 0.00nan0x7fffffff |
| ATOM | 711 | O5* | G A | 34 | 7.201  | -24.802 | 47.798 | 0.00nan0x7fffffff |
| ATOM | 712 | C5* | G A | 34 | 8.402  | -24.009 | 47.617 | 0.00nan0x7fffffff |
| ATOM | 713 | C4* | G A | 34 | 7.957  | -22.611 | 47.260 | 0.00nan0x7fffffff |
| ATOM | 714 | C3* | G A | 34 | 6.817  | -22.039 | 48.085 | 0.00nan0x7fffffff |
| ATOM | 715 | O4* | G A | 34 | 7.449  | -22.614 | 45.906 | 0.00nan0x7fffffff |
| ATOM | 716 | O2* | G A | 34 | 7.040  | -19.832 | 47.238 | 0.00nan0x7fffffff |
| ATOM | 717 | C2* | G A | 34 | 6.233  | -20.996 | 47.134 | 0.00nan0x7fffffff |
| ATOM | 718 | C1* | G A | 34 | 6.411  | -21.670 | 45.780 | 0.00nan0x7fffffff |
| ATOM | 719 | N9  | G A | 34 | 5.128  | -22.293 | 45.396 | 0.00nan0x7fffffff |
| ATOM | 720 | C8  | G A | 34 | 4.829  | -23.628 | 45.311 | 0.00nan0x7fffffff |
| ATOM | 721 | N7  | G A | 34 | 3.599  | -23.870 | 44.934 | 0.00nan0x7fffffff |
| ATOM | 722 | C5  | G A | 34 | 3.050  | -22.602 | 44.755 | 0.00nan0x7fffffff |
| ATOM | 723 | O6  | G A | 34 | 0.793  | -22.906 | 44.062 | 0.00nan0x7fffffff |
| ATOM | 724 | C6  | G A | 34 | 1.753  | -22.190 | 44.352 | 0.00nan0x7fffffff |
| ATOM | 725 | N1  | G A | 34 | 1.588  | -20.829 | 44.290 | 0.00nan0x7fffffff |
| ATOM | 726 | N2  | G A | 34 | 2.261  | -18.662 | 44.480 | 0.00nan0x7fffffff |
| ATOM | 727 | C2  | G A | 34 | 2.587  | -19.956 | 44.591 | 0.00nan0x7fffffff |
| ATOM | 728 | N3  | G A | 34 | 3.819  | -20.289 | 44.973 | 0.00nan0x7fffffff |
| ATOM | 729 | C4  | G A | 34 | 3.981  | -21.625 | 45.034 | 0.00nan0x7fffffff |
| ATOM | 730 | O3* | G A | 34 | 7.240  | -21.473 | 49.328 | 0.00nan0x7fffffff |
| ATOM | 731 | P   | C A | 35 | 6.336  | -21.613 | 50.653 | 0.00nan0x7fffffff |
| ATOM | 732 | O1P | C A | 35 | 7.338  | -21.625 | 51.751 | 0.00nan0x7fffffff |
| ATOM | 733 | O2P | C A | 35 | 5.525  | -22.872 | 50.614 | 0.00nan0x7fffffff |
| ATOM | 734 | O5* | C A | 35 | 5.406  | -20.319 | 50.622 | 0.00nan0x7fffffff |
| ATOM | 735 | C5* | C A | 35 | 5.986  | -19.007 | 50.403 | 0.00nan0x7fffffff |
| ATOM | 736 | C4* | C A | 35 | 4.851  | -18.073 | 50.056 | 0.00nan0x7fffffff |
| ATOM | 737 | C3* | C A | 35 | 3.588  | -18.214 | 50.889 | 0.00nan0x7fffffff |
| ATOM | 738 | O4* | C A | 35 | 4.417  | -18.346 | 48.704 | 0.00nan0x7fffffff |
| ATOM | 739 | O2* | C A | 35 | 2.574  | -16.235 | 50.056 | 0.00nan0x7fffffff |
| ATOM | 740 | C2* | C A | 35 | 2.527  | -17.650 | 49.946 | 0.00nan0x7fffffff |
| ATOM | 741 | C1* | C A | 35 | 3.033  | -18.114 | 48.587 | 0.00nan0x7fffffff |
| ATOM | 742 | N1  | C A | 35 | 2.289  | -19.334 | 48.204 | 0.00nan0x7fffffff |
| ATOM | 743 | C6  | C A | 35 | 2.874  | -20.565 | 48.158 | 0.00nan0x7fffffff |
| ATOM | 744 | C5  | C A | 35 | 2.200  | -21.671 | 47.805 | 0.00nan0x7fffffff |
| ATOM | 745 | N4  | C A | 35 | 0.082  | -22.568 | 47.107 | 0.00nan0x7fffffff |
| ATOM | 746 | C4  | C A | 35 | 0.827  | -21.520 | 47.470 | 0.00nan0x7fffffff |
| ATOM | 747 | N3  | C A | 35 | 0.250  | -20.288 | 47.515 | 0.00nan0x7fffffff |
| ATOM | 748 | O2  | C A | 35 | 0.421  | -18.065 | 47.915 | 0.00nan0x7fffffff |
| ATOM | 749 | C2  | C A | 35 | 0.952  | -19.173 | 47.877 | 0.00nan0x7fffffff |
| ATOM | 750 | O3* | C A | 35 | 3.644  | -17.515 | 52.135 | 0.00nan0x7fffffff |
| ATOM | 751 | P   | C A | 36 | 2.966  | -18.128 | 53.460 | 0.00nan0x7fffffff |
| ATOM | 752 | O1P | C A | 36 | 3.819  | -17.601 | 54.556 | 0.00nan0x7fffffff |
| ATOM | 753 | O2P | C A | 36 | 2.964  | -19.625 | 53.414 | 0.00nan0x7fffffff |
| ATOM | 754 | O5* | C A | 36 | 1.482  | -17.542 | 53.436 | 0.00nan0x7fffffff |
| ATOM | 755 | C5* | C A | 36 | 1.261  | -16.126 | 53.213 | 0.00nan0x7fffffff |
| ATOM | 756 | C4* | C A | 36 | -0.200 | -15.955 | 52.869 | 0.00nan0x7fffffff |
| ATOM | 757 | C3* | C A | 36 | -1.184 | -16.757 | 53.703 | 0.00nan0x7fffffff |
| ATOM | 758 | O4* | C A | 36 | -0.420 | -16.417 | 51.517 | 0.00nan0x7fffffff |
| ATOM | 759 | O2* | C A | 36 | -3.109 | -15.640 | 52.876 | 0.00nan0x7fffffff |
| ATOM | 760 | C2* | C A | 36 | -2.383 | -16.855 | 52.763 | 0.00nan0x7fffffff |
| ATOM | 761 | C1* | C A | 36 | -1.709 | -16.970 | 51.402 | 0.00nan0x7fffffff |
| ATOM | 762 | N1  | C A | 36 | -1.677 | -18.399 | 51.019 | 0.00nan0x7fffffff |
| ATOM | 763 | C6  | C A | 36 | -0.519 | -19.118 | 50.973 | 0.00nan0x7fffffff |
| ATOM | 764 | C5  | C A | 36 | -0.489 | -20.413 | 50.620 | 0.00nan0x7fffffff |
| ATOM | 765 | N4  | C A | 36 | -1.785 | -22.313 | 49.921 | 0.00nan0x7fffffff |
| ATOM | 766 | C4  | C A | 36 | -1.725 | -21.028 | 50.284 | 0.00nan0x7fffffff |
| ATOM | 767 | N3  | C A | 36 | -2.876 | -20.303 | 50.329 | 0.00nan0x7fffffff |

|      |     |     |     |    |         |         |        |                   |
|------|-----|-----|-----|----|---------|---------|--------|-------------------|
| ATOM | 768 | O2  | C A | 36 | -3.934  | -18.341 | 50.728 | 0.00nan0x7fffffff |
| ATOM | 769 | C2  | C A | 36 | -2.888  | -18.986 | 50.691 | 0.00nan0x7fffffff |
| ATOM | 770 | O3* | C A | 36 | -1.512  | -16.140 | 54.951 | 0.00nan0x7fffffff |
| ATOM | 771 | P   | C A | 37 | -1.751  | -17.025 | 56.274 | 0.00nan0x7fffffff |
| ATOM | 772 | O1P | C A | 37 | -1.320  | -16.121 | 57.372 | 0.00nan0x7fffffff |
| ATOM | 773 | O2P | C A | 37 | -0.941  | -18.284 | 56.226 | 0.00nan0x7fffffff |
| ATOM | 774 | O5* | C A | 37 | -3.314  | -17.337 | 56.249 | 0.00nan0x7fffffff |
| ATOM | 775 | C5* | C A | 37 | -4.269  | -16.266 | 56.036 | 0.00nan0x7fffffff |
| ATOM | 776 | C4* | C A | 37 | -5.589  | -16.911 | 55.687 | 0.00nan0x7fffffff |
| ATOM | 777 | C3* | C A | 37 | -5.985  | -18.121 | 56.517 | 0.00nan0x7fffffff |
| ATOM | 778 | O4* | C A | 37 | -5.520  | -17.416 | 54.334 | 0.00nan0x7fffffff |
| ATOM | 779 | O2* | C A | 37 | -8.206  | -18.220 | 55.683 | 0.00nan0x7fffffff |
| ATOM | 780 | C2* | C A | 37 | -6.938  | -18.850 | 55.572 | 0.00nan0x7fffffff |
| ATOM | 781 | C1* | C A | 37 | -6.305  | -18.579 | 54.215 | 0.00nan0x7fffffff |
| ATOM | 782 | N1  | C A | 37 | -5.504  | -19.762 | 53.830 | 0.00nan0x7fffffff |
| ATOM | 783 | C6  | C A | 37 | -4.141  | -19.740 | 53.785 | 0.00nan0x7fffffff |
| ATOM | 784 | C5  | C A | 37 | -3.414  | -20.813 | 53.432 | 0.00nan0x7fffffff |
| ATOM | 785 | N4  | C A | 37 | -3.477  | -23.112 | 52.734 | 0.00nan0x7fffffff |
| ATOM | 786 | C4  | C A | 37 | -4.121  | -22.000 | 53.096 | 0.00nan0x7fffffff |
| ATOM | 787 | N3  | C A | 37 | -5.482  | -22.013 | 53.141 | 0.00nan0x7fffffff |
| ATOM | 788 | O2  | C A | 37 | -7.433  | -20.935 | 53.541 | 0.00nan0x7fffffff |
| ATOM | 789 | C2  | C A | 37 | -6.205  | -20.912 | 53.503 | 0.00nan0x7fffffff |
| ATOM | 790 | O3* | C A | 37 | -6.599  | -17.782 | 57.764 | 0.00nan0x7fffffff |
| ATOM | 791 | P   | C A | 38 | -6.325  | -18.658 | 59.086 | 0.00nan0x7fffffff |
| ATOM | 792 | O1P | C A | 38 | -6.457  | -17.667 | 60.186 | 0.00nan0x7fffffff |
| ATOM | 793 | O2P | C A | 38 | -4.961  | -19.277 | 59.042 | 0.00nan0x7fffffff |
| ATOM | 794 | O5* | C A | 38 | -7.470  | -19.768 | 59.054 | 0.00nan0x7fffffff |
| ATOM | 795 | C5* | C A | 38 | -8.851  | -19.384 | 58.832 | 0.00nan0x7fffffff |
| ATOM | 796 | C4* | C A | 38 | -9.610  | -20.642 | 58.485 | 0.00nan0x7fffffff |
| ATOM | 797 | C3* | C A | 38 | -9.290  | -21.872 | 59.318 | 0.00nan0x7fffffff |
| ATOM | 798 | O4* | C A | 38 | -9.276  | -21.033 | 57.133 | 0.00nan0x7fffffff |
| ATOM | 799 | O2* | C A | 38 | -11.101 | -23.160 | 58.484 | 0.00nan0x7fffffff |
| ATOM | 800 | C2* | C A | 38 | -9.694  | -23.003 | 58.375 | 0.00nan0x7fffffff |
| ATOM | 801 | C1* | C A | 38 | -9.306  | -22.436 | 57.017 | 0.00nan0x7fffffff |
| ATOM | 802 | N1  | C A | 38 | -7.992  | -22.998 | 56.635 | 0.00nan0x7fffffff |
| ATOM | 803 | C6  | C A | 38 | -6.858  | -22.242 | 56.590 | 0.00nan0x7fffffff |
| ATOM | 804 | C5  | C A | 38 | -5.667  | -22.752 | 56.237 | 0.00nan0x7fffffff |
| ATOM | 805 | N4  | C A | 38 | -4.475  | -24.719 | 55.540 | 0.00nan0x7fffffff |
| ATOM | 806 | C4  | C A | 38 | -5.619  | -24.132 | 55.901 | 0.00nan0x7fffffff |
| ATOM | 807 | N3  | C A | 38 | -6.756  | -24.879 | 55.946 | 0.00nan0x7fffffff |
| ATOM | 808 | O2  | C A | 38 | -8.980  | -25.028 | 56.343 | 0.00nan0x7fffffff |
| ATOM | 809 | C2  | C A | 38 | -7.960  | -24.344 | 56.307 | 0.00nan0x7fffffff |
| ATOM | 810 | O3* | C A | 38 | -9.992  | -21.916 | 60.563 | 0.00nan0x7fffffff |
| ATOM | 811 | P   | G A | 39 | -9.291  | -22.500 | 61.889 | 0.00nan0x7fffffff |
| ATOM | 812 | O1P | G A | 39 | -9.939  | -21.733 | 62.985 | 0.00nan0x7fffffff |
| ATOM | 813 | O2P | G A | 39 | -7.809  | -22.284 | 61.848 | 0.00nan0x7fffffff |
| ATOM | 814 | O5* | G A | 39 | -9.654  | -24.052 | 61.863 | 0.00nan0x7fffffff |
| ATOM | 815 | C5* | G A | 39 | -11.021 | -24.478 | 61.626 | 0.00nan0x7fffffff |
| ATOM | 816 | C4* | G A | 39 | -10.974 | -25.947 | 61.282 | 0.00nan0x7fffffff |
| ATOM | 817 | C3* | G A | 39 | -10.040 | -26.803 | 62.121 | 0.00nan0x7fffffff |
| ATOM | 818 | O4* | G A | 39 | -10.477 | -26.096 | 59.933 | 0.00nan0x7fffffff |
| ATOM | 819 | O2* | G A | 39 | -10.856 | -28.871 | 61.288 | 0.00nan0x7fffffff |
| ATOM | 820 | C2* | G A | 39 | -9.760  | -27.974 | 61.181 | 0.00nan0x7fffffff |
| ATOM | 821 | C1* | G A | 39 | -9.739  | -27.290 | 59.821 | 0.00nan0x7fffffff |
| ATOM | 822 | N9  | G A | 39 | -8.331  | -27.049 | 59.442 | 0.00nan0x7fffffff |
| ATOM | 823 | C8  | G A | 39 | -7.672  | -25.851 | 59.359 | 0.00nan0x7fffffff |
| ATOM | 824 | N7  | G A | 39 | -6.422  | -25.961 | 58.984 | 0.00nan0x7fffffff |
| ATOM | 825 | C5  | G A | 39 | -6.249  | -27.331 | 58.803 | 0.00nan0x7fffffff |
| ATOM | 826 | O6  | G A | 39 | -3.995  | -27.669 | 58.112 | 0.00nan0x7fffffff |
| ATOM | 827 | C6  | G A | 39 | -5.118  | -28.089 | 58.400 | 0.00nan0x7fffffff |
| ATOM | 828 | N1  | G A | 39 | -5.339  | -29.441 | 58.335 | 0.00nan0x7fffffff |
| ATOM | 829 | N2  | G A | 39 | -6.591  | -31.335 | 58.520 | 0.00nan0x7fffffff |
| ATOM | 830 | C2  | G A | 39 | -6.543  | -30.001 | 58.633 | 0.00nan0x7fffffff |
| ATOM | 831 | N3  | G A | 39 | -7.634  | -29.338 | 59.015 | 0.00nan0x7fffffff |

|      |     |     |     |    |         |         |        |                   |
|------|-----|-----|-----|----|---------|---------|--------|-------------------|
| ATOM | 832 | C4  | G A | 39 | -7.416  | -28.010 | 59.078 | 0.00nan0x7fffffff |
| ATOM | 833 | O3* | G A | 39 | -10.610 | -27.220 | 63.364 | 0.00nan0x7fffffff |
| ATOM | 834 | P   | G A | 40 | -9.710  | -27.325 | 64.695 | 0.00nan0x7fffffff |
| ATOM | 835 | O1P | G A | 40 | -10.675 | -27.028 | 65.785 | 0.00nan0x7fffffff |
| ATOM | 836 | O2P | G A | 40 | -8.582  | -26.340 | 64.655 | 0.00nan0x7fffffff |
| ATOM | 837 | O5* | G A | 40 | -9.174  | -28.826 | 64.677 | 0.00nan0x7fffffff |
| ATOM | 838 | C5* | G A | 40 | -10.091 | -29.929 | 64.458 | 0.00nan0x7fffffff |
| ATOM | 839 | C4* | G A | 40 | -9.256  | -31.137 | 64.108 | 0.00nan0x7fffffff |
| ATOM | 840 | C3* | G A | 40 | -8.002  | -31.349 | 64.940 | 0.00nan0x7fffffff |
| ATOM | 841 | O4* | G A | 40 | -8.765  | -30.991 | 62.756 | 0.00nan0x7fffffff |
| ATOM | 842 | O2* | G A | 40 | -7.568  | -33.528 | 64.102 | 0.00nan0x7fffffff |
| ATOM | 843 | C2* | G A | 40 | -7.136  | -32.179 | 63.995 | 0.00nan0x7fffffff |
| ATOM | 844 | C1* | G A | 40 | -7.497  | -31.591 | 62.637 | 0.00nan0x7fffffff |
| ATOM | 845 | N9  | G A | 40 | -6.449  | -30.623 | 62.255 | 0.00nan0x7fffffff |
| ATOM | 846 | C8  | G A | 40 | -6.548  | -29.259 | 62.174 | 0.00nan0x7fffffff |
| ATOM | 847 | N7  | G A | 40 | -5.441  | -28.670 | 61.798 | 0.00nan0x7fffffff |
| ATOM | 848 | C5  | G A | 40 | -4.550  | -29.725 | 61.614 | 0.00nan0x7fffffff |
| ATOM | 849 | O6  | G A | 40 | -2.477  | -28.780 | 60.920 | 0.00nan0x7fffffff |
| ATOM | 850 | C6  | G A | 40 | -3.189  | -29.744 | 61.208 | 0.00nan0x7fffffff |
| ATOM | 851 | N1  | G A | 40 | -2.638  | -30.999 | 61.142 | 0.00nan0x7fffffff |
| ATOM | 852 | N2  | G A | 40 | -2.657  | -33.268 | 61.325 | 0.00nan0x7fffffff |
| ATOM | 853 | C2  | G A | 40 | -3.343  | -32.124 | 61.440 | 0.00nan0x7fffffff |
| ATOM | 854 | N3  | G A | 40 | -4.618  | -32.162 | 61.825 | 0.00nan0x7fffffff |
| ATOM | 855 | C4  | G A | 40 | -5.159  | -30.930 | 61.890 | 0.00nan0x7fffffff |
| ATOM | 856 | O3* | G A | 40 | -8.248  | -32.010 | 66.184 | 0.00nan0x7fffffff |
| ATOM | 857 | P   | U A | 41 | -7.424  | -31.612 | 67.509 | 0.00nan0x7fffffff |
| ATOM | 858 | O1P | U A | 41 | -8.395  | -31.869 | 68.605 | 0.00nan0x7fffffff |
| ATOM | 859 | O2P | U A | 41 | -6.993  | -30.179 | 67.459 | 0.00nan0x7fffffff |
| ATOM | 860 | O5* | U A | 41 | -6.171  | -32.599 | 67.491 | 0.00nan0x7fffffff |
| ATOM | 861 | C5* | U A | 41 | -6.362  | -34.016 | 67.246 | 0.00nan0x7fffffff |
| ATOM | 862 | C4* | U A | 41 | -5.009  | -34.593 | 66.905 | 0.00nan0x7fffffff |
| ATOM | 863 | C3* | U A | 41 | -3.839  | -34.104 | 67.741 | 0.00nan0x7fffffff |
| ATOM | 864 | O4* | U A | 41 | -4.665  | -34.210 | 65.554 | 0.00nan0x7fffffff |
| ATOM | 865 | O2* | U A | 41 | -2.308  | -35.718 | 66.915 | 0.00nan0x7fffffff |
| ATOM | 866 | C2* | U A | 41 | -2.659  | -34.347 | 66.803 | 0.00nan0x7fffffff |
| ATOM | 867 | C1* | U A | 41 | -3.271  | -34.044 | 65.442 | 0.00nan0x7fffffff |
| ATOM | 868 | N1  | U A | 41 | -2.897  | -32.664 | 65.061 | 0.00nan0x7fffffff |
| ATOM | 869 | C6  | U A | 41 | -3.802  | -31.646 | 65.016 | 0.00nan0x7fffffff |
| ATOM | 870 | C5  | U A | 41 | -3.463  | -30.396 | 64.665 | 0.00nan0x7fffffff |
| ATOM | 871 | O4  | U A | 41 | -1.660  | -29.015 | 63.980 | 0.00nan0x7fffffff |
| ATOM | 872 | C4  | U A | 41 | -2.102  | -30.149 | 64.326 | 0.00nan0x7fffffff |
| ATOM | 873 | N3  | U A | 41 | -1.207  | -31.178 | 64.372 | 0.00nan0x7fffffff |
| ATOM | 874 | O2  | U A | 41 | -0.749  | -33.360 | 64.768 | 0.00nan0x7fffffff |
| ATOM | 875 | C2  | U A | 41 | -1.569  | -32.445 | 64.732 | 0.00nan0x7fffffff |
| ATOM | 876 | O3* | U A | 41 | -3.701  | -34.791 | 68.988 | 0.00nan0x7fffffff |
| ATOM | 877 | P   | A A | 42 | -3.226  | -34.013 | 70.315 | 0.00nan0x7fffffff |
| ATOM | 878 | O1P | A A | 42 | -3.895  | -34.764 | 71.410 | 0.00nan0x7fffffff |
| ATOM | 879 | O2P | A A | 42 | -3.651  | -32.577 | 70.272 | 0.00nan0x7fffffff |
| ATOM | 880 | O5* | A A | 42 | -1.638  | -34.152 | 70.292 | 0.00nan0x7fffffff |
| ATOM | 881 | C5* | A A | 42 | -1.021  | -35.444 | 70.055 | 0.00nan0x7fffffff |
| ATOM | 882 | C4* | A A | 42 | 0.427   | -35.188 | 69.713 | 0.00nan0x7fffffff |
| ATOM | 883 | C3* | A A | 42 | 1.139   | -34.140 | 70.550 | 0.00nan0x7fffffff |
| ATOM | 884 | O4* | A A | 42 | 0.505   | -34.676 | 68.362 | 0.00nan0x7fffffff |
| ATOM | 885 | O2* | A A | 42 | 3.304   | -34.653 | 69.721 | 0.00nan0x7fffffff |
| ATOM | 886 | C2* | A A | 42 | 2.260   | -33.697 | 69.612 | 0.00nan0x7fffffff |
| ATOM | 887 | C1* | A A | 42 | 1.582   | -33.775 | 68.251 | 0.00nan0x7fffffff |
| ATOM | 888 | N9  | A A | 42 | 1.143   | -32.417 | 67.869 | 0.00nan0x7fffffff |
| ATOM | 889 | C8  | A A | 42 | -0.136  | -31.932 | 67.787 | 0.00nan0x7fffffff |
| ATOM | 890 | N7  | A A | 42 | -0.204  | -30.680 | 67.410 | 0.00nan0x7fffffff |
| ATOM | 891 | C5  | A A | 42 | 1.127   | -30.317 | 67.228 | 0.00nan0x7fffffff |
| ATOM | 892 | N6  | A A | 42 | 1.034   | -28.000 | 66.529 | 0.00nan0x7fffffff |
| ATOM | 893 | C6  | A A | 42 | 1.719   | -29.096 | 66.825 | 0.00nan0x7fffffff |
| ATOM | 894 | N1  | A A | 42 | 3.084   | -29.109 | 66.756 | 0.00nan0x7fffffff |
| ATOM | 895 | C2  | A A | 42 | 3.805   | -30.224 | 67.057 | 0.00nan0x7fffffff |

|      |     |     |     |    |       |         |        |                   |
|------|-----|-----|-----|----|-------|---------|--------|-------------------|
| ATOM | 896 | N3  | A A | 42 | 3.311 | -31.399 | 67.440 | 0.00nan0x7fffffff |
| ATOM | 897 | C4  | A A | 42 | 1.965 | -31.376 | 67.505 | 0.00nan0x7fffffff |
| ATOM | 898 | O3* | A A | 42 | 1.632 | -34.643 | 71.796 | 0.00nan0x7fffffff |
| ATOM | 899 | P   | A A | 43 | 1.608 | -33.733 | 73.123 | 0.00nan0x7fffffff |
| ATOM | 900 | O1P | A A | 43 | 1.446 | -34.727 | 74.217 | 0.00nan0x7fffffff |
| ATOM | 901 | O2P | A A | 43 | 0.477 | -32.752 | 73.078 | 0.00nan0x7fffffff |
| ATOM | 902 | O5* | A A | 43 | 3.022 | -32.994 | 73.105 | 0.00nan0x7fffffff |
| ATOM | 903 | C5* | A A | 43 | 4.237 | -33.749 | 72.862 | 0.00nan0x7fffffff |
| ATOM | 904 | C4* | A A | 43 | 5.317 | -32.750 | 72.519 | 0.00nan0x7fffffff |
| ATOM | 905 | C3* | A A | 43 | 5.350 | -31.484 | 73.357 | 0.00nan0x7fffffff |
| ATOM | 906 | O4* | A A | 43 | 5.106 | -32.278 | 71.169 | 0.00nan0x7fffffff |
| ATOM | 907 | O2* | A A | 43 | 7.449 | -30.747 | 72.527 | 0.00nan0x7fffffff |
| ATOM | 908 | C2* | A A | 43 | 6.054 | -30.506 | 72.419 | 0.00nan0x7fffffff |
| ATOM | 909 | C1* | A A | 43 | 5.525 | -30.938 | 71.058 | 0.00nan0x7fffffff |
| ATOM | 910 | N9  | A A | 43 | 4.422 | -30.033 | 70.676 | 0.00nan0x7fffffff |
| ATOM | 911 | C8  | A A | 43 | 3.083 | -30.316 | 70.594 | 0.00nan0x7fffffff |
| ATOM | 912 | N7  | A A | 43 | 2.349 | -29.299 | 70.217 | 0.00nan0x7fffffff |
| ATOM | 913 | C5  | A A | 43 | 3.273 | -28.274 | 70.035 | 0.00nan0x7fffffff |
| ATOM | 914 | N6  | A A | 43 | 1.942 | -26.375 | 69.335 | 0.00nan0x7fffffff |
| ATOM | 915 | C6  | A A | 43 | 3.111 | -26.927 | 69.631 | 0.00nan0x7fffffff |
| ATOM | 916 | N1  | A A | 43 | 4.267 | -26.201 | 69.562 | 0.00nan0x7fffffff |
| ATOM | 917 | C2  | A A | 43 | 5.476 | -26.749 | 69.862 | 0.00nan0x7fffffff |
| ATOM | 918 | N3  | A A | 43 | 5.696 | -28.004 | 70.246 | 0.00nan0x7fffffff |
| ATOM | 919 | C4  | A A | 43 | 4.551 | -28.713 | 70.312 | 0.00nan0x7fffffff |
| ATOM | 920 | O3* | A A | 43 | 6.036 | -31.641 | 74.602 | 0.00nan0x7fffffff |
| ATOM | 921 | P   | U A | 44 | 5.526 | -30.887 | 75.929 | 0.00nan0x7fffffff |
| ATOM | 922 | O1P | U A | 44 | 5.912 | -31.817 | 77.022 | 0.00nan0x7fffffff |
| ATOM | 923 | O2P | U A | 44 | 4.047 | -30.658 | 75.877 | 0.00nan0x7fffffff |
| ATOM | 924 | O5* | U A | 44 | 6.330 | -29.510 | 75.919 | 0.00nan0x7fffffff |
| ATOM | 925 | C5* | U A | 44 | 7.761 | -29.501 | 75.683 | 0.00nan0x7fffffff |
| ATOM | 926 | C4* | U A | 44 | 8.145 | -28.081 | 75.341 | 0.00nan0x7fffffff |
| ATOM | 927 | C3* | U A | 44 | 7.496 | -26.990 | 76.176 | 0.00nan0x7fffffff |
| ATOM | 928 | O4* | U A | 44 | 7.721 | -27.794 | 73.990 | 0.00nan0x7fffffff |
| ATOM | 929 | O2* | U A | 44 | 8.883 | -25.249 | 75.352 | 0.00nan0x7fffffff |
| ATOM | 930 | C2* | U A | 44 | 7.575 | -25.788 | 75.238 | 0.00nan0x7fffffff |
| ATOM | 931 | C1* | U A | 44 | 7.362 | -26.437 | 73.877 | 0.00nan0x7fffffff |
| ATOM | 932 | N1  | U A | 44 | 5.944 | -26.260 | 73.493 | 0.00nan0x7fffffff |
| ATOM | 933 | C6  | U A | 44 | 5.062 | -27.299 | 73.449 | 0.00nan0x7fffffff |
| ATOM | 934 | C5  | U A | 44 | 3.778 | -27.139 | 73.096 | 0.00nan0x7fffffff |
| ATOM | 935 | O4  | U A | 44 | 2.159 | -25.547 | 72.410 | 0.00nan0x7fffffff |
| ATOM | 936 | C4  | U A | 44 | 3.343 | -25.825 | 72.757 | 0.00nan0x7fffffff |
| ATOM | 937 | N3  | U A | 44 | 4.236 | -24.795 | 72.804 | 0.00nan0x7fffffff |
| ATOM | 938 | O2  | U A | 44 | 6.332 | -24.036 | 73.201 | 0.00nan0x7fffffff |
| ATOM | 939 | C2  | U A | 44 | 5.541 | -24.976 | 73.165 | 0.00nan0x7fffffff |
| ATOM | 940 | O3* | U A | 44 | 8.155 | -26.758 | 77.424 | 0.00nan0x7fffffff |
| ATOM | 941 | P   | C A | 45 | 7.316 | -26.395 | 78.749 | 0.00nan0x7fffffff |
| ATOM | 942 | O1P | C A | 45 | 8.145 | -26.960 | 79.845 | 0.00nan0x7fffffff |
| ATOM | 943 | O2P | C A | 45 | 5.950 | -27.008 | 78.699 | 0.00nan0x7fffffff |
| ATOM | 944 | O5* | C A | 45 | 7.241 | -24.802 | 78.730 | 0.00nan0x7fffffff |
| ATOM | 945 | C5* | C A | 45 | 8.441 | -24.017 | 78.510 | 0.00nan0x7fffffff |
| ATOM | 946 | C4* | C A | 45 | 7.997 | -22.616 | 78.166 | 0.00nan0x7fffffff |
| ATOM | 947 | C3* | C A | 45 | 6.860 | -22.048 | 78.997 | 0.00nan0x7fffffff |
| ATOM | 948 | O4* | C A | 45 | 7.488 | -22.606 | 76.812 | 0.00nan0x7fffffff |
| ATOM | 949 | O2* | C A | 45 | 7.089 | -19.835 | 78.169 | 0.00nan0x7fffffff |
| ATOM | 950 | C2* | C A | 45 | 6.279 | -20.996 | 78.055 | 0.00nan0x7fffffff |
| ATOM | 951 | C1* | C A | 45 | 6.453 | -21.658 | 76.696 | 0.00nan0x7fffffff |
| ATOM | 952 | N1  | C A | 45 | 5.165 | -22.276 | 76.311 | 0.00nan0x7fffffff |
| ATOM | 953 | C6  | C A | 45 | 4.985 | -23.627 | 76.264 | 0.00nan0x7fffffff |
| ATOM | 954 | C5  | C A | 45 | 3.818 | -24.187 | 75.911 | 0.00nan0x7fffffff |
| ATOM | 955 | N4  | C A | 45 | 1.553 | -23.786 | 75.214 | 0.00nan0x7fffffff |
| ATOM | 956 | C4  | C A | 45 | 2.748 | -23.313 | 75.576 | 0.00nan0x7fffffff |
| ATOM | 957 | N3  | C A | 45 | 2.935 | -21.965 | 75.623 | 0.00nan0x7fffffff |
| ATOM | 958 | O2  | C A | 45 | 4.289 | -20.194 | 76.023 | 0.00nan0x7fffffff |
| ATOM | 959 | C2  | C A | 45 | 4.131 | -21.413 | 75.985 | 0.00nan0x7fffffff |

|      |      |     |     |    |        |         |        |                   |
|------|------|-----|-----|----|--------|---------|--------|-------------------|
| ATOM | 960  | O3* | C A | 45 | 7.286  | -21.494 | 80.245 | 0.00nan0x7fffffff |
| ATOM | 961  | P   | U A | 46 | 6.378  | -21.640 | 81.566 | 0.00nan0x7fffffff |
| ATOM | 962  | O1P | U A | 46 | 7.375  | -21.654 | 82.668 | 0.00nan0x7fffffff |
| ATOM | 963  | O2P | U A | 46 | 5.567  | -22.899 | 81.520 | 0.00nan0x7fffffff |
| ATOM | 964  | O5* | U A | 46 | 5.446  | -20.346 | 81.535 | 0.00nan0x7fffffff |
| ATOM | 965  | C5* | U A | 46 | 6.025  | -19.036 | 81.305 | 0.00nan0x7fffffff |
| ATOM | 966  | C4* | U A | 46 | 4.889  | -18.104 | 80.960 | 0.00nan0x7fffffff |
| ATOM | 967  | C3* | U A | 46 | 3.627  | -18.244 | 81.794 | 0.00nan0x7fffffff |
| ATOM | 968  | O4* | U A | 46 | 4.454  | -18.376 | 79.608 | 0.00nan0x7fffffff |
| ATOM | 969  | O2* | U A | 46 | 2.612  | -16.265 | 80.963 | 0.00nan0x7fffffff |
| ATOM | 970  | C2* | U A | 46 | 2.565  | -17.680 | 80.852 | 0.00nan0x7fffffff |
| ATOM | 971  | C1* | U A | 46 | 3.070  | -18.144 | 79.493 | 0.00nan0x7fffffff |
| ATOM | 972  | N1  | U A | 46 | 2.324  | -19.363 | 79.111 | 0.00nan0x7fffffff |
| ATOM | 973  | C6  | U A | 46 | 2.906  | -20.595 | 79.066 | 0.00nan0x7fffffff |
| ATOM | 974  | C5  | U A | 46 | 2.230  | -21.699 | 78.714 | 0.00nan0x7fffffff |
| ATOM | 975  | O4  | U A | 46 | 0.111  | -22.517 | 78.029 | 0.00nan0x7fffffff |
| ATOM | 976  | C4  | U A | 46 | 0.854  | -21.553 | 78.376 | 0.00nan0x7fffffff |
| ATOM | 977  | N3  | U A | 46 | 0.285  | -20.315 | 78.422 | 0.00nan0x7fffffff |
| ATOM | 978  | O2  | U A | 46 | 0.457  | -18.093 | 78.818 | 0.00nan0x7fffffff |
| ATOM | 979  | C2  | U A | 46 | 0.987  | -19.201 | 78.783 | 0.00nan0x7fffffff |
| ATOM | 980  | O3* | U A | 46 | 3.685  | -17.545 | 83.040 | 0.00nan0x7fffffff |
| ATOM | 981  | P   | U A | 47 | 3.004  | -18.156 | 84.364 | 0.00nan0x7fffffff |
| ATOM | 982  | O1P | U A | 47 | 3.861  | -17.636 | 85.461 | 0.00nan0x7fffffff |
| ATOM | 983  | O2P | U A | 47 | 2.994  | -19.654 | 84.316 | 0.00nan0x7fffffff |
| ATOM | 984  | O5* | U A | 47 | 1.524  | -17.563 | 84.342 | 0.00nan0x7fffffff |
| ATOM | 985  | C5* | U A | 47 | 1.310  | -16.145 | 84.124 | 0.00nan0x7fffffff |
| ATOM | 986  | C4* | U A | 47 | -0.148 | -15.964 | 83.778 | 0.00nan0x7fffffff |
| ATOM | 987  | C3* | U A | 47 | -1.140 | -16.759 | 84.611 | 0.00nan0x7fffffff |
| ATOM | 988  | O4* | U A | 47 | -0.370 | -16.426 | 82.426 | 0.00nan0x7fffffff |
| ATOM | 989  | O2* | U A | 47 | -3.056 | -15.630 | 83.780 | 0.00nan0x7fffffff |
| ATOM | 990  | C2* | U A | 47 | -2.338 | -16.850 | 83.669 | 0.00nan0x7fffffff |
| ATOM | 991  | C1* | U A | 47 | -1.663 | -16.970 | 82.309 | 0.00nan0x7fffffff |
| ATOM | 992  | N1  | U A | 47 | -1.640 | -18.399 | 81.926 | 0.00nan0x7fffffff |
| ATOM | 993  | C6  | U A | 47 | -0.487 | -19.127 | 81.881 | 0.00nan0x7fffffff |
| ATOM | 994  | C5  | U A | 47 | -0.467 | -20.421 | 81.528 | 0.00nan0x7fffffff |
| ATOM | 995  | O4  | U A | 47 | -1.817 | -22.247 | 80.842 | 0.00nan0x7fffffff |
| ATOM | 996  | C4  | U A | 47 | -1.707 | -21.035 | 81.190 | 0.00nan0x7fffffff |
| ATOM | 997  | N3  | U A | 47 | -2.851 | -20.295 | 81.237 | 0.00nan0x7fffffff |
| ATOM | 998  | O2  | U A | 47 | -3.896 | -18.326 | 81.635 | 0.00nan0x7fffffff |
| ATOM | 999  | C2  | U A | 47 | -2.855 | -18.978 | 81.598 | 0.00nan0x7fffffff |
| ATOM | 1000 | O3* | U A | 47 | -1.466 | -16.138 | 85.857 | 0.00nan0x7fffffff |
| ATOM | 1001 | P   | C A | 48 | -1.711 | -17.019 | 87.182 | 0.00nan0x7fffffff |
| ATOM | 1002 | O1P | C A | 48 | -1.275 | -16.116 | 88.279 | 0.00nan0x7fffffff |
| ATOM | 1003 | O2P | C A | 48 | -0.908 | -18.284 | 87.137 | 0.00nan0x7fffffff |
| ATOM | 1004 | O5* | C A | 48 | -3.276 | -17.322 | 87.157 | 0.00nan0x7fffffff |
| ATOM | 1005 | C5* | C A | 48 | -4.226 | -16.244 | 86.953 | 0.00nan0x7fffffff |
| ATOM | 1006 | C4* | C A | 48 | -5.549 | -16.880 | 86.601 | 0.00nan0x7fffffff |
| ATOM | 1007 | C3* | C A | 48 | -5.956 | -18.087 | 87.429 | 0.00nan0x7fffffff |
| ATOM | 1008 | O4* | C A | 48 | -5.480 | -17.385 | 85.248 | 0.00nan0x7fffffff |
| ATOM | 1009 | O2* | C A | 48 | -8.175 | -18.171 | 86.590 | 0.00nan0x7fffffff |
| ATOM | 1010 | C2* | C A | 48 | -6.911 | -18.809 | 86.482 | 0.00nan0x7fffffff |
| ATOM | 1011 | C1* | C A | 48 | -6.273 | -18.542 | 85.126 | 0.00nan0x7fffffff |
| ATOM | 1012 | N1  | C A | 48 | -5.479 | -19.730 | 84.743 | 0.00nan0x7fffffff |
| ATOM | 1013 | C6  | C A | 48 | -4.116 | -19.717 | 84.697 | 0.00nan0x7fffffff |
| ATOM | 1014 | C5  | C A | 48 | -3.396 | -20.794 | 84.345 | 0.00nan0x7fffffff |
| ATOM | 1015 | N4  | C A | 48 | -3.471 | -23.093 | 83.649 | 0.00nan0x7fffffff |
| ATOM | 1016 | C4  | C A | 48 | -4.109 | -21.976 | 84.010 | 0.00nan0x7fffffff |
| ATOM | 1017 | N3  | C A | 48 | -5.470 | -21.982 | 84.056 | 0.00nan0x7fffffff |
| ATOM | 1018 | O2  | C A | 48 | -7.415 | -20.892 | 84.454 | 0.00nan0x7fffffff |
| ATOM | 1019 | C2  | C A | 48 | -6.187 | -20.876 | 84.416 | 0.00nan0x7fffffff |
| ATOM | 1020 | O3* | C A | 48 | -6.570 | -17.744 | 88.674 | 0.00nan0x7fffffff |
| ATOM | 1021 | P   | U A | 49 | -6.304 | -18.620 | 89.998 | 0.00nan0x7fffffff |
| ATOM | 1022 | O1P | U A | 49 | -6.439 | -17.628 | 91.098 | 0.00nan0x7fffffff |
| ATOM | 1023 | O2P | U A | 49 | -4.940 | -19.240 | 89.961 | 0.00nan0x7fffffff |



|      |      |     |   |   |    |         |         |        |                   |
|------|------|-----|---|---|----|---------|---------|--------|-------------------|
| ATOM | 1024 | O5* | U | A | 49 | -7.449  | -19.728 | 89.962 | 0.00nan0x7fffffff |
| ATOM | 1025 | C5* | U | A | 49 | -8.833  | -19.341 | 89.762 | 0.00nan0x7fffffff |
| ATOM | 1026 | C4* | U | A | 49 | -9.596  | -20.594 | 89.406 | 0.00nan0x7fffffff |
| ATOM | 1027 | C3* | U | A | 49 | -9.283  | -21.830 | 90.232 | 0.00nan0x7fffffff |
| ATOM | 1028 | O4* | U | A | 49 | -9.260  | -20.977 | 88.052 | 0.00nan0x7fffffff |
| ATOM | 1029 | O2* | U | A | 49 | -11.097 | -23.105 | 89.385 | 0.00nan0x7fffffff |
| ATOM | 1030 | C2* | U | A | 49 | -9.689  | -22.953 | 89.281 | 0.00nan0x7fffffff |
| ATOM | 1031 | C1* | U | A | 49 | -9.296  | -22.379 | 87.927 | 0.00nan0x7fffffff |
| ATOM | 1032 | N1  | U | A | 49 | -7.982  | -22.943 | 87.547 | 0.00nan0x7fffffff |
| ATOM | 1033 | C6  | U | A | 49 | -6.845  | -22.191 | 87.504 | 0.00nan0x7fffffff |
| ATOM | 1034 | C5  | U | A | 49 | -5.656  | -22.702 | 87.154 | 0.00nan0x7fffffff |
| ATOM | 1035 | O4  | U | A | 49 | -4.542  | -24.683 | 86.471 | 0.00nan0x7fffffff |
| ATOM | 1036 | C4  | U | A | 49 | -5.603  | -24.085 | 86.816 | 0.00nan0x7fffffff |
| ATOM | 1037 | N3  | U | A | 49 | -6.748  | -24.826 | 86.862 | 0.00nan0x7fffffff |
| ATOM | 1038 | O2  | U | A | 49 | -8.972  | -24.972 | 87.254 | 0.00nan0x7fffffff |
| ATOM | 1039 | C2  | U | A | 49 | -7.951  | -24.289 | 87.220 | 0.00nan0x7fffffff |
| ATOM | 1040 | O3* | U | A | 49 | -9.988  | -21.879 | 91.475 | 0.00nan0x7fffffff |
| ATOM | 1041 | P   | U | A | 50 | -9.290  | -22.472 | 92.799 | 0.00nan0x7fffffff |
| ATOM | 1042 | O1P | U | A | 50 | -9.950  | -21.721 | 93.899 | 0.00nan0x7fffffff |
| ATOM | 1043 | O2P | U | A | 50 | -7.810  | -22.246 | 92.769 | 0.00nan0x7fffffff |
| ATOM | 1044 | O5* | U | A | 50 | -9.642  | -24.027 | 92.755 | 0.00nan0x7fffffff |
| ATOM | 1045 | C5* | U | A | 50 | -11.026 | -24.460 | 92.692 | 0.00nan0x7fffffff |
| ATOM | 1046 | C4* | U | A | 50 | -11.017 | -25.913 | 92.283 | 0.00nan0x7fffffff |
| ATOM | 1047 | C3* | U | A | 50 | -10.102 | -26.829 | 93.078 | 0.00nan0x7fffffff |
| ATOM | 1048 | O4* | U | A | 50 | -10.530 | -26.014 | 90.925 | 0.00nan0x7fffffff |
| ATOM | 1049 | O2* | U | A | 50 | -10.973 | -28.837 | 92.158 | 0.00nan0x7fffffff |
| ATOM | 1050 | C2* | U | A | 50 | -9.856  | -27.964 | 92.085 | 0.00nan0x7fffffff |
| ATOM | 1051 | C1* | U | A | 50 | -9.824  | -27.221 | 90.757 | 0.00nan0x7fffffff |
| ATOM | 1052 | N1  | U | A | 50 | -8.411  | -27.001 | 90.377 | 0.00nan0x7fffffff |
| ATOM | 1053 | C6  | U | A | 50 | -7.850  | -25.759 | 90.328 | 0.00nan0x7fffffff |
| ATOM | 1054 | C5  | U | A | 50 | -6.571  | -25.559 | 89.975 | 0.00nan0x7fffffff |
| ATOM | 1055 | O4  | U | A | 50 | -4.576  | -26.645 | 89.290 | 0.00nan0x7fffffff |
| ATOM | 1056 | C4  | U | A | 50 | -5.792  | -26.703 | 89.638 | 0.00nan0x7fffffff |
| ATOM | 1057 | N3  | U | A | 50 | -6.367  | -27.939 | 89.686 | 0.00nan0x7fffffff |
| ATOM | 1058 | O2  | U | A | 50 | -8.172  | -29.246 | 90.084 | 0.00nan0x7fffffff |
| ATOM | 1059 | C2  | U | A | 50 | -7.671  | -28.124 | 90.047 | 0.00nan0x7fffffff |
| ATOM | 1060 | O3* | U | A | 50 | -10.678 | -27.288 | 94.304 | 0.00nan0x7fffffff |
| ATOM | 1061 | P   | C | A | 51 | -9.791  | -27.456 | 95.636 | 0.00nan0x7fffffff |
| ATOM | 1062 | O1P | C | A | 51 | -10.770 | -27.226 | 96.730 | 0.00nan0x7fffffff |
| ATOM | 1063 | O2P | C | A | 51 | -8.673  | -26.458 | 95.660 | 0.00nan0x7fffffff |
| ATOM | 1064 | O5* | C | A | 51 | -9.238  | -28.948 | 95.547 | 0.00nan0x7fffffff |
| ATOM | 1065 | C5* | C | A | 51 | -10.110 | -30.078 | 95.804 | 0.00nan0x7fffffff |
| ATOM | 1066 | C4* | C | A | 51 | -9.411  | -31.304 | 95.266 | 0.00nan0x7fffffff |
| ATOM | 1067 | C3* | C | A | 51 | -8.122  | -31.701 | 95.966 | 0.00nan0x7fffffff |
| ATOM | 1068 | O4* | C | A | 51 | -9.010  | -31.045 | 93.901 | 0.00nan0x7fffffff |
| ATOM | 1069 | O2* | C | A | 51 | -7.922  | -33.797 | 94.868 | 0.00nan0x7fffffff |
| ATOM | 1070 | C2* | C | A | 51 | -7.396  | -32.478 | 94.870 | 0.00nan0x7fffffff |
| ATOM | 1071 | C1* | C | A | 51 | -7.807  | -31.719 | 93.617 | 0.00nan0x7fffffff |
| ATOM | 1072 | N1  | C | A | 51 | -6.717  | -30.788 | 93.248 | 0.00nan0x7fffffff |
| ATOM | 1073 | C6  | C | A | 51 | -6.897  | -29.437 | 93.196 | 0.00nan0x7fffffff |
| ATOM | 1074 | C5  | C | A | 51 | -5.912  | -28.592 | 92.849 | 0.00nan0x7fffffff |
| ATOM | 1075 | N4  | C | A | 51 | -3.617  | -28.389 | 92.167 | 0.00nan0x7fffffff |
| ATOM | 1076 | C4  | C | A | 51 | -4.650  | -29.158 | 92.522 | 0.00nan0x7fffffff |
| ATOM | 1077 | N3  | C | A | 51 | -4.481  | -30.508 | 92.569 | 0.00nan0x7fffffff |
| ATOM | 1078 | O2  | C | A | 51 | -5.331  | -32.570 | 92.963 | 0.00nan0x7fffffff |
| ATOM | 1079 | C2  | C | A | 51 | -5.495  | -31.353 | 92.922 | 0.00nan0x7fffffff |
| ATOM | 1080 | O3* | C | A | 51 | -8.335  | -32.485 | 97.143 | 0.00nan0x7fffffff |
| ATOM | 1081 | P   | G | A | 52 | -7.408  | -32.312 | 98.446 | 0.00nan0x7fffffff |
| ATOM | 1082 | O1P | G | A | 52 | -8.242  | -32.881 | 99.538 | 0.00nan0x7fffffff |
| ATOM | 1083 | O2P | G | A | 52 | -7.080  | -30.869 | 98.681 | 0.00nan0x7fffffff |
| ATOM | 1084 | O5* | G | A | 52 | -6.101  | -33.158 | 98.105 | 0.00nan0x7fffffff |
| ATOM | 1085 | C5* | G | A | 52 | -6.165  | -34.600 | 97.958 | 0.00nan0x7fffffff |
| ATOM | 1086 | C4* | G | A | 52 | -4.909  | -35.023 | 97.233 | 0.00nan0x7fffffff |
| ATOM | 1087 | C3* | G | A | 52 | -3.597  | -34.573 | 97.854 | 0.00nan0x7fffffff |

|      |      |     |     |    |        |         |         |                   |
|------|------|-----|-----|----|--------|---------|---------|-------------------|
| ATOM | 1088 | O4* | G A | 52 | -4.907 | -34.417 | 95.920  | 0.00nan0x7fffffff |
| ATOM | 1089 | O2* | G A | 52 | -2.234 | -35.914 | 96.447  | 0.00nan0x7fffffff |
| ATOM | 1090 | C2* | G A | 52 | -2.661 | -34.575 | 96.648  | 0.00nan0x7fffffff |
| ATOM | 1091 | C1* | G A | 52 | -3.588 | -34.118 | 95.529  | 0.00nan0x7fffffff |
| ATOM | 1092 | N9  | G A | 52 | -3.386 | -32.669 | 95.322  | 0.00nan0x7fffffff |
| ATOM | 1093 | C8  | G A | 52 | -4.269 | -31.652 | 95.576  | 0.00nan0x7fffffff |
| ATOM | 1094 | N7  | G A | 52 | -3.802 | -30.464 | 95.286  | 0.00nan0x7fffffff |
| ATOM | 1095 | C5  | G A | 52 | -2.518 | -30.718 | 94.812  | 0.00nan0x7fffffff |
| ATOM | 1096 | O6  | G A | 52 | -1.550 | -28.617 | 94.248  | 0.00nan0x7fffffff |
| ATOM | 1097 | C6  | G A | 52 | -1.502 | -29.846 | 94.340  | 0.00nan0x7fffffff |
| ATOM | 1098 | N1  | G A | 52 | -0.348 | -30.480 | 93.956  | 0.00nan0x7fffffff |
| ATOM | 1099 | N2  | G A | 52 | 0.986  | -32.290 | 93.595  | 0.00nan0x7fffffff |
| ATOM | 1100 | C2  | G A | 52 | -0.201 | -31.831 | 94.014  | 0.00nan0x7fffffff |
| ATOM | 1101 | N3  | G A | 52 | -1.120 | -32.694 | 94.447  | 0.00nan0x7fffffff |
| ATOM | 1102 | C4  | G A | 52 | -2.251 | -32.070 | 94.829  | 0.00nan0x7fffffff |
| ATOM | 1103 | O3* | G A | 52 | -3.140 | -35.427 | 98.906  | 0.00nan0x7fffffff |
| ATOM | 1104 | P   | U A | 53 | -2.402 | -34.820 | 100.202 | 0.00nan0x7fffffff |
| ATOM | 1105 | O1P | U A | 53 | -2.682 | -35.828 | 101.258 | 0.00nan0x7fffffff |
| ATOM | 1106 | O2P | U A | 53 | -2.956 | -33.471 | 100.548 | 0.00nan0x7fffffff |
| ATOM | 1107 | O5* | U A | 53 | -0.872 | -34.727 | 99.766  | 0.00nan0x7fffffff |
| ATOM | 1108 | C5* | U A | 53 | -0.177 | -35.909 | 99.290  | 0.00nan0x7fffffff |
| ATOM | 1109 | C4* | U A | 53 | 1.100  | -35.438 | 98.637  | 0.00nan0x7fffffff |
| ATOM | 1110 | C3* | U A | 53 | 2.017  | -34.580 | 99.493  | 0.00nan0x7fffffff |
| ATOM | 1111 | O4* | U A | 53 | 0.767  | -34.591 | 97.514  | 0.00nan0x7fffffff |
| ATOM | 1112 | O2* | U A | 53 | 3.844  | -34.660 | 97.978  | 0.00nan0x7fffffff |
| ATOM | 1113 | C2* | U A | 53 | 2.802  | -33.809 | 98.434  | 0.00nan0x7fffffff |
| ATOM | 1114 | C1* | U A | 53 | 1.751  | -33.597 | 97.353  | 0.00nan0x7fffffff |
| ATOM | 1115 | N1  | U A | 53 | 1.203  | -32.230 | 97.495  | 0.00nan0x7fffffff |
| ATOM | 1116 | C6  | U A | 53 | -0.096 | -31.993 | 97.835  | 0.00nan0x7fffffff |
| ATOM | 1117 | C5  | U A | 53 | -0.594 | -30.753 | 97.956  | 0.00nan0x7fffffff |
| ATOM | 1118 | O4  | U A | 53 | -0.064 | -28.446 | 97.794  | 0.00nan0x7fffffff |
| ATOM | 1119 | C4  | U A | 53 | 0.286  | -29.659 | 97.712  | 0.00nan0x7fffffff |
| ATOM | 1120 | N3  | U A | 53 | 1.582  | -29.911 | 97.370  | 0.00nan0x7fffffff |
| ATOM | 1121 | O2  | U A | 53 | 3.244  | -31.387 | 96.941  | 0.00nan0x7fffffff |
| ATOM | 1122 | C2  | U A | 53 | 2.073  | -31.180 | 97.250  | 0.00nan0x7fffffff |
| ATOM | 1123 | O3* | U A | 53 | 2.864  | -35.339 | 100.360 | 0.00nan0x7fffffff |
| ATOM | 1124 | P   | A A | 54 | 3.226  | -34.813 | 101.836 | 0.00nan0x7fffffff |
| ATOM | 1125 | O1P | A A | 54 | 3.493  | -36.065 | 102.591 | 0.00nan0x7fffffff |
| ATOM | 1126 | O2P | A A | 54 | 2.085  | -34.035 | 102.420 | 0.00nan0x7fffffff |
| ATOM | 1127 | O5* | A A | 54 | 4.506  | -33.889 | 101.613 | 0.00nan0x7fffffff |
| ATOM | 1128 | C5* | A A | 54 | 5.658  | -34.397 | 100.892 | 0.00nan0x7fffffff |
| ATOM | 1129 | C4* | A A | 54 | 6.506  | -33.205 | 100.518 | 0.00nan0x7fffffff |
| ATOM | 1130 | C3* | A A | 54 | 6.784  | -32.205 | 101.627 | 0.00nan0x7fffffff |
| ATOM | 1131 | O4* | A A | 54 | 5.809  | -32.435 | 99.511  | 0.00nan0x7fffffff |
| ATOM | 1132 | O2* | A A | 54 | 8.417  | -30.991 | 100.404 | 0.00nan0x7fffffff |
| ATOM | 1133 | C2* | A A | 54 | 7.066  | -30.929 | 100.836 | 0.00nan0x7fffffff |
| ATOM | 1134 | C1* | A A | 54 | 6.106  | -31.066 | 99.662  | 0.00nan0x7fffffff |
| ATOM | 1135 | N9  | A A | 54 | 4.903  | -30.257 | 99.943  | 0.00nan0x7fffffff |
| ATOM | 1136 | C8  | A A | 54 | 3.651  | -30.693 | 100.292 | 0.00nan0x7fffffff |
| ATOM | 1137 | N7  | A A | 54 | 2.783  | -29.727 | 100.465 | 0.00nan0x7fffffff |
| ATOM | 1138 | C5  | A A | 54 | 3.517  | -28.573 | 100.205 | 0.00nan0x7fffffff |
| ATOM | 1139 | N6  | A A | 54 | 1.935  | -26.765 | 100.517 | 0.00nan0x7fffffff |
| ATOM | 1140 | C6  | A A | 54 | 3.151  | -27.206 | 100.222 | 0.00nan0x7fffffff |
| ATOM | 1141 | N1  | A A | 54 | 4.155  | -26.334 | 99.908  | 0.00nan0x7fffffff |
| ATOM | 1142 | C2  | A A | 54 | 5.411  | -26.766 | 99.612  | 0.00nan0x7fffffff |
| ATOM | 1143 | N3  | A A | 54 | 5.817  | -28.034 | 99.568  | 0.00nan0x7fffffff |
| ATOM | 1144 | C4  | A A | 54 | 4.820  | -28.886 | 99.880  | 0.00nan0x7fffffff |
| ATOM | 1145 | O3* | A A | 54 | 7.876  | -32.580 | 102.471 | 0.00nan0x7fffffff |
| ATOM | 1146 | P   | C A | 55 | 7.844  | -32.277 | 104.051 | 0.00nan0x7fffffff |
| ATOM | 1147 | O1P | C A | 55 | 8.623  | -33.402 | 104.632 | 0.00nan0x7fffffff |
| ATOM | 1148 | O2P | C A | 55 | 6.435  | -32.243 | 104.560 | 0.00nan0x7fffffff |
| ATOM | 1149 | O5* | C A | 55 | 8.545  | -30.851 | 104.183 | 0.00nan0x7fffffff |
| ATOM | 1150 | C5* | C A | 55 | 9.604  | -30.471 | 103.266 | 0.00nan0x7fffffff |
| ATOM | 1151 | C4* | C A | 55 | 9.798  | -28.981 | 103.409 | 0.00nan0x7fffffff |

|      |      |     |     |    |        |         |         |                   |
|------|------|-----|-----|----|--------|---------|---------|-------------------|
| ATOM | 1152 | C3* | C A | 55 | 9.325  | -28.366 | 104.716 | 0.00nan0x7fffffff |
| ATOM | 1153 | O4* | C A | 55 | 9.019  | -28.306 | 102.395 | 0.00nan0x7fffffff |
| ATOM | 1154 | O2* | C A | 55 | 10.341 | -26.255 | 104.326 | 0.00nan0x7fffffff |
| ATOM | 1155 | C2* | C A | 55 | 9.083  | -26.914 | 104.308 | 0.00nan0x7fffffff |
| ATOM | 1156 | C1* | C A | 55 | 8.562  | -27.068 | 102.885 | 0.00nan0x7fffffff |
| ATOM | 1157 | N1  | C A | 55 | 7.085  | -26.984 | 102.918 | 0.00nan0x7fffffff |
| ATOM | 1158 | C6  | C A | 55 | 6.288  | -28.090 | 102.866 | 0.00nan0x7fffffff |
| ATOM | 1159 | C5  | C A | 55 | 4.948  | -28.013 | 102.891 | 0.00nan0x7fffffff |
| ATOM | 1160 | N4  | C A | 55 | 3.043  | -26.551 | 103.000 | 0.00nan0x7fffffff |
| ATOM | 1161 | C4  | C A | 55 | 4.368  | -26.718 | 102.971 | 0.00nan0x7fffffff |
| ATOM | 1162 | N3  | C A | 55 | 5.170  | -25.619 | 103.020 | 0.00nan0x7fffffff |
| ATOM | 1163 | O2  | C A | 55 | 7.247  | -24.717 | 103.038 | 0.00nan0x7fffffff |
| ATOM | 1164 | C2  | C A | 55 | 6.533  | -25.716 | 102.993 | 0.00nan0x7fffffff |
| ATOM | 1165 | O3* | C A | 55 | 10.268 | -28.487 | 105.783 | 0.00nan0x7fffffff |
| ATOM | 1166 | P   | U A | 56 | 9.793  | -28.795 | 107.291 | 0.00nan0x7fffffff |
| ATOM | 1167 | O1P | U A | 56 | 10.995 | -29.421 | 107.904 | 0.00nan0x7fffffff |
| ATOM | 1168 | O2P | U A | 56 | 8.614  | -29.721 | 107.297 | 0.00nan0x7fffffff |
| ATOM | 1169 | O5* | U A | 56 | 9.417  | -27.367 | 107.881 | 0.00nan0x7fffffff |
| ATOM | 1170 | C5* | U A | 56 | 10.466 | -26.420 | 108.212 | 0.00nan0x7fffffff |
| ATOM | 1171 | C4* | U A | 56 | 9.780  | -25.155 | 108.666 | 0.00nan0x7fffffff |
| ATOM | 1172 | C3* | U A | 56 | 8.620  | -25.329 | 109.631 | 0.00nan0x7fffffff |
| ATOM | 1173 | O4* | U A | 56 | 9.189  | -24.504 | 107.517 | 0.00nan0x7fffffff |
| ATOM | 1174 | O2* | U A | 56 | 8.439  | -23.018 | 110.143 | 0.00nan0x7fffffff |
| ATOM | 1175 | C2* | U A | 56 | 7.819  | -24.051 | 109.393 | 0.00nan0x7fffffff |
| ATOM | 1176 | C1* | U A | 56 | 8.009  | -23.836 | 107.897 | 0.00nan0x7fffffff |
| ATOM | 1177 | N1  | U A | 56 | 6.816  | -24.366 | 107.200 | 0.00nan0x7fffffff |
| ATOM | 1178 | C6  | U A | 56 | 6.730  | -25.659 | 106.775 | 0.00nan0x7fffffff |
| ATOM | 1179 | C5  | U A | 56 | 5.649  | -26.138 | 106.142 | 0.00nan0x7fffffff |
| ATOM | 1180 | O4  | U A | 56 | 3.491  | -25.577 | 105.331 | 0.00nan0x7fffffff |
| ATOM | 1181 | C4  | U A | 56 | 4.563  | -25.244 | 105.916 | 0.00nan0x7fffffff |
| ATOM | 1182 | N3  | U A | 56 | 4.663  | -23.953 | 106.346 | 0.00nan0x7fffffff |
| ATOM | 1183 | O2  | U A | 56 | 5.843  | -22.315 | 107.369 | 0.00nan0x7fffffff |
| ATOM | 1184 | C2  | U A | 56 | 5.771  | -23.481 | 106.989 | 0.00nan0x7fffffff |
| ATOM | 1185 | O3* | U A | 56 | 9.027  | -25.480 | 110.994 | 0.00nan0x7fffffff |
| ATOM | 1186 | P   | C A | 57 | 8.190  | -26.435 | 111.983 | 0.00nan0x7fffffff |
| ATOM | 1187 | O1P | C A | 57 | 7.190  | -27.067 | 111.081 | 0.00nan0x7fffffff |
| ATOM | 1188 | O2P | C A | 57 | 7.537  | -25.633 | 113.069 | 0.00nan0x7fffffff |
| ATOM | 1189 | O5* | C A | 57 | 9.272  | -27.442 | 112.576 | 0.00nan0x7fffffff |
| ATOM | 1190 | C5* | C A | 57 | 10.284 | -28.045 | 111.730 | 0.00nan0x7fffffff |
| ATOM | 1191 | C4* | C A | 57 | 10.794 | -29.273 | 112.447 | 0.00nan0x7fffffff |
| ATOM | 1192 | C3* | C A | 57 | 9.819  | -30.434 | 112.553 | 0.00nan0x7fffffff |
| ATOM | 1193 | O4* | C A | 57 | 11.085 | -28.927 | 113.820 | 0.00nan0x7fffffff |
| ATOM | 1194 | O2* | C A | 57 | 11.435 | -31.980 | 113.351 | 0.00nan0x7fffffff |
| ATOM | 1195 | C2* | C A | 57 | 10.347 | -31.174 | 113.780 | 0.00nan0x7fffffff |
| ATOM | 1196 | C1* | C A | 57 | 10.825 | -30.028 | 114.661 | 0.00nan0x7fffffff |
| ATOM | 1197 | N1  | C A | 57 | 9.773  | -29.728 | 115.658 | 0.00nan0x7fffffff |
| ATOM | 1198 | C6  | C A | 57 | 9.247  | -28.478 | 115.807 | 0.00nan0x7fffffff |
| ATOM | 1199 | C5  | C A | 57 | 8.295  | -28.199 | 116.712 | 0.00nan0x7fffffff |
| ATOM | 1200 | N4  | C A | 57 | 6.899  | -29.077 | 118.461 | 0.00nan0x7fffffff |
| ATOM | 1201 | C4  | C A | 57 | 7.843  | -29.266 | 117.535 | 0.00nan0x7fffffff |
| ATOM | 1202 | N3  | C A | 57 | 8.377  | -30.510 | 117.384 | 0.00nan0x7fffffff |
| ATOM | 1203 | O2  | C A | 57 | 9.821  | -31.901 | 116.329 | 0.00nan0x7fffffff |
| ATOM | 1204 | C2  | C A | 57 | 9.349  | -30.774 | 116.461 | 0.00nan0x7fffffff |
| ATOM | 1205 | O3* | C A | 57 | 9.779  | -31.263 | 111.388 | 0.00nan0x7fffffff |
| ATOM | 1206 | P   | G A | 58 | 8.398  | -31.861 | 110.819 | 0.00nan0x7fffffff |
| ATOM | 1207 | O1P | G A | 58 | 8.814  | -32.554 | 109.571 | 0.00nan0x7fffffff |
| ATOM | 1208 | O2P | G A | 58 | 7.412  | -30.764 | 110.553 | 0.00nan0x7fffffff |
| ATOM | 1209 | O5* | G A | 58 | 7.885  | -32.834 | 111.974 | 0.00nan0x7fffffff |
| ATOM | 1210 | C5* | G A | 58 | 8.147  | -34.259 | 111.907 | 0.00nan0x7fffffff |
| ATOM | 1211 | C4* | G A | 58 | 7.175  | -34.941 | 112.840 | 0.00nan0x7fffffff |
| ATOM | 1212 | C3* | G A | 58 | 5.710  | -34.574 | 112.670 | 0.00nan0x7fffffff |
| ATOM | 1213 | O4* | G A | 58 | 7.481  | -34.561 | 114.200 | 0.00nan0x7fffffff |
| ATOM | 1214 | O2* | G A | 58 | 4.905  | -36.302 | 114.085 | 0.00nan0x7fffffff |
| ATOM | 1215 | C2* | G A | 58 | 5.144  | -34.903 | 114.050 | 0.00nan0x7fffffff |

|      |      |     |     |    |        |         |         |                   |
|------|------|-----|-----|----|--------|---------|---------|-------------------|
| ATOM | 1216 | C1* | G A | 58 | 6.299  | -34.519 | 114.965 | 0.00nan0x7fffffff |
| ATOM | 1217 | N9  | G A | 58 | 6.029  | -33.176 | 115.518 | 0.00nan0x7fffffff |
| ATOM | 1218 | C8  | G A | 58 | 6.493  | -31.967 | 115.070 | 0.00nan0x7fffffff |
| ATOM | 1219 | N7  | G A | 58 | 6.080  | -30.948 | 115.780 | 0.00nan0x7fffffff |
| ATOM | 1220 | C5  | G A | 58 | 5.289  | -31.529 | 116.768 | 0.00nan0x7fffffff |
| ATOM | 1221 | O6  | G A | 58 | 4.468  | -29.763 | 118.140 | 0.00nan0x7fffffff |
| ATOM | 1222 | C6  | G A | 58 | 4.559  | -30.957 | 117.843 | 0.00nan0x7fffffff |
| ATOM | 1223 | N1  | G A | 58 | 3.890  | -31.869 | 118.619 | 0.00nan0x7fffffff |
| ATOM | 1224 | N2  | G A | 58 | 3.219  | -33.959 | 119.224 | 0.00nan0x7fffffff |
| ATOM | 1225 | C2  | G A | 58 | 3.927  | -33.207 | 118.372 | 0.00nan0x7fffffff |
| ATOM | 1226 | N3  | G A | 58 | 4.595  | -33.794 | 117.380 | 0.00nan0x7fffffff |
| ATOM | 1227 | C4  | G A | 58 | 5.252  | -32.898 | 116.618 | 0.00nan0x7fffffff |
| ATOM | 1228 | O3* | G A | 58 | 5.055  | -35.293 | 111.622 | 0.00nan0x7fffffff |
| ATOM | 1229 | P   | C A | 59 | 3.969  | -34.579 | 110.670 | 0.00nan0x7fffffff |
| ATOM | 1230 | O1P | C A | 59 | 4.061  | -35.360 | 109.407 | 0.00nan0x7fffffff |
| ATOM | 1231 | O2P | C A | 59 | 4.313  | -33.135 | 110.463 | 0.00nan0x7fffffff |
| ATOM | 1232 | O5* | C A | 59 | 2.594  | -34.746 | 111.452 | 0.00nan0x7fffffff |
| ATOM | 1233 | C5* | C A | 59 | 1.814  | -35.959 | 111.294 | 0.00nan0x7fffffff |
| ATOM | 1234 | C4* | C A | 59 | 0.664  | -35.869 | 112.267 | 0.00nan0x7fffffff |
| ATOM | 1235 | C3* | C A | 59 | -0.398 | -34.827 | 111.962 | 0.00nan0x7fffffff |
| ATOM | 1236 | O4* | C A | 59 | 1.175  | -35.486 | 113.565 | 0.00nan0x7fffffff |
| ATOM | 1237 | O2* | C A | 59 | -1.933 | -35.621 | 113.590 | 0.00nan0x7fffffff |
| ATOM | 1238 | C2* | C A | 59 | -0.999 | -34.579 | 113.343 | 0.00nan0x7fffffff |
| ATOM | 1239 | C1* | C A | 59 | 0.220  | -34.707 | 114.246 | 0.00nan0x7fffffff |
| ATOM | 1240 | N1  | C A | 59 | 0.716  | -33.346 | 114.549 | 0.00nan0x7fffffff |
| ATOM | 1241 | C6  | C A | 59 | 1.771  | -32.787 | 113.890 | 0.00nan0x7fffffff |
| ATOM | 1242 | C5  | C A | 59 | 2.221  | -31.553 | 114.167 | 0.00nan0x7fffffff |
| ATOM | 1243 | N4  | C A | 59 | 1.936  | -29.593 | 115.529 | 0.00nan0x7fffffff |
| ATOM | 1244 | C4  | C A | 59 | 1.554  | -30.827 | 115.190 | 0.00nan0x7fffffff |
| ATOM | 1245 | N3  | C A | 59 | 0.502  | -31.392 | 115.845 | 0.00nan0x7fffffff |
| ATOM | 1246 | O2  | C A | 59 | -0.894 | -33.150 | 116.147 | 0.00nan0x7fffffff |
| ATOM | 1247 | C2  | C A | 59 | 0.057  | -32.650 | 115.550 | 0.00nan0x7fffffff |
| ATOM | 1248 | O3* | C A | 59 | -1.371 | -35.263 | 111.008 | 0.00nan0x7fffffff |
| ATOM | 1249 | P   | C A | 60 | -1.982 | -34.240 | 109.926 | 0.00nan0x7fffffff |
| ATOM | 1250 | O1P | C A | 60 | -2.378 | -35.129 | 108.802 | 0.00nan0x7fffffff |
| ATOM | 1251 | O2P | C A | 60 | -0.955 | -33.230 | 109.509 | 0.00nan0x7fffffff |
| ATOM | 1252 | O5* | C A | 60 | -3.200 | -33.552 | 110.687 | 0.00nan0x7fffffff |
| ATOM | 1253 | C5* | C A | 60 | -4.482 | -34.226 | 110.765 | 0.00nan0x7fffffff |
| ATOM | 1254 | C4* | C A | 60 | -5.321 | -33.461 | 111.759 | 0.00nan0x7fffffff |
| ATOM | 1255 | C3* | C A | 60 | -5.612 | -32.009 | 111.420 | 0.00nan0x7fffffff |
| ATOM | 1256 | O4* | C A | 60 | -4.613 | -33.396 | 113.019 | 0.00nan0x7fffffff |
| ATOM | 1257 | O2* | C A | 60 | -7.235 | -31.724 | 113.128 | 0.00nan0x7fffffff |
| ATOM | 1258 | C2* | C A | 60 | -5.889 | -31.415 | 112.799 | 0.00nan0x7fffffff |
| ATOM | 1259 | C1* | C A | 60 | -4.915 | -32.188 | 113.677 | 0.00nan0x7fffffff |
| ATOM | 1260 | N1  | C A | 60 | -3.718 | -31.347 | 113.896 | 0.00nan0x7fffffff |
| ATOM | 1261 | C6  | C A | 60 | -2.489 | -31.678 | 113.407 | 0.00nan0x7fffffff |
| ATOM | 1262 | C5  | C A | 60 | -1.403 | -30.915 | 113.609 | 0.00nan0x7fffffff |
| ATOM | 1263 | N4  | C A | 60 | -0.544 | -28.909 | 114.617 | 0.00nan0x7fffffff |
| ATOM | 1264 | C4  | C A | 60 | -1.572 | -29.725 | 114.368 | 0.00nan0x7fffffff |
| ATOM | 1265 | N3  | C A | 60 | -2.802 | -29.401 | 114.853 | 0.00nan0x7fffffff |
| ATOM | 1266 | O2  | C A | 60 | -5.002 | -29.887 | 115.080 | 0.00nan0x7fffffff |
| ATOM | 1267 | C2  | C A | 60 | -3.896 | -30.190 | 114.637 | 0.00nan0x7fffffff |
| ATOM | 1268 | O3* | C A | 60 | -6.708 | -31.838 | 110.517 | 0.00nan0x7fffffff |
| ATOM | 1269 | P   | A A | 61 | -6.478 | -30.481 | 107.789 | 0.00nan0x7fffffff |
| ATOM | 1270 | O1P | A A | 61 | -7.430 | -30.756 | 106.677 | 0.00nan0x7fffffff |
| ATOM | 1271 | O2P | A A | 61 | -5.075 | -30.288 | 107.296 | 0.00nan0x7fffffff |
| ATOM | 1272 | O5* | A A | 61 | -6.920 | -29.304 | 108.764 | 0.00nan0x7fffffff |
| ATOM | 1273 | C5* | A A | 61 | -7.917 | -29.551 | 109.790 | 0.00nan0x7fffffff |
| ATOM | 1274 | C4* | A A | 61 | -8.012 | -28.294 | 110.619 | 0.00nan0x7fffffff |
| ATOM | 1275 | C3* | A A | 61 | -7.490 | -27.020 | 109.977 | 0.00nan0x7fffffff |
| ATOM | 1276 | O4* | A A | 61 | -7.201 | -28.450 | 111.806 | 0.00nan0x7fffffff |
| ATOM | 1277 | O2* | A A | 61 | -8.382 | -25.577 | 111.638 | 0.00nan0x7fffffff |
| ATOM | 1278 | C2* | A A | 61 | -7.166 | -26.163 | 111.199 | 0.00nan0x7fffffff |
| ATOM | 1279 | C1* | A A | 61 | -6.667 | -27.205 | 112.191 | 0.00nan0x7fffffff |

|      |      |     |     |    |        |         |         |                   |
|------|------|-----|-----|----|--------|---------|---------|-------------------|
| ATOM | 1280 | N9  | A A | 61 | -5.190 | -27.191 | 112.174 | 0.00nan0x7fffffff |
| ATOM | 1281 | C8  | A A | 61 | -4.335 | -28.223 | 111.889 | 0.00nan0x7fffffff |
| ATOM | 1282 | N7  | A A | 61 | -3.068 | -27.894 | 111.954 | 0.00nan0x7fffffff |
| ATOM | 1283 | C5  | A A | 61 | -3.095 | -26.547 | 112.303 | 0.00nan0x7fffffff |
| ATOM | 1284 | N6  | A A | 61 | -0.762 | -25.907 | 112.424 | 0.00nan0x7fffffff |
| ATOM | 1285 | C6  | A A | 61 | -2.052 | -25.616 | 112.527 | 0.00nan0x7fffffff |
| ATOM | 1286 | N1  | A A | 61 | -2.462 | -24.353 | 112.851 | 0.00nan0x7fffffff |
| ATOM | 1287 | C2  | A A | 61 | -3.781 | -24.037 | 112.966 | 0.00nan0x7fffffff |
| ATOM | 1288 | N3  | A A | 61 | -4.808 | -24.863 | 112.771 | 0.00nan0x7fffffff |
| ATOM | 1289 | C4  | A A | 61 | -4.393 | -26.103 | 112.441 | 0.00nan0x7fffffff |
| ATOM | 1290 | O3* | A A | 61 | -8.427 | -26.391 | 109.098 | 0.00nan0x7fffffff |
| ATOM | 1291 | P   | A A | 62 | -7.946 | -25.698 | 107.725 | 0.00nan0x7fffffff |
| ATOM | 1292 | O1P | A A | 62 | -9.224 | -25.454 | 107.004 | 0.00nan0x7fffffff |
| ATOM | 1293 | O2P | A A | 62 | -7.036 | -26.613 | 106.962 | 0.00nan0x7fffffff |
| ATOM | 1294 | O5* | A A | 62 | -7.190 | -24.382 | 108.197 | 0.00nan0x7fffffff |
| ATOM | 1295 | C5* | A A | 62 | -7.853 | -23.450 | 109.091 | 0.00nan0x7fffffff |
| ATOM | 1296 | C4* | A A | 62 | -6.911 | -22.288 | 109.287 | 0.00nan0x7fffffff |
| ATOM | 1297 | C3* | A A | 62 | -6.112 | -21.854 | 108.071 | 0.00nan0x7fffffff |
| ATOM | 1298 | O4* | A A | 62 | -5.905 | -22.657 | 110.259 | 0.00nan0x7fffffff |
| ATOM | 1299 | O2* | A A | 62 | -5.308 | -19.849 | 109.054 | 0.00nan0x7fffffff |
| ATOM | 1300 | C2* | A A | 62 | -4.909 | -21.168 | 108.712 | 0.00nan0x7fffffff |
| ATOM | 1301 | C1* | A A | 62 | -4.688 | -22.017 | 109.957 | 0.00nan0x7fffffff |
| ATOM | 1302 | N9  | A A | 62 | -3.597 | -22.975 | 109.686 | 0.00nan0x7fffffff |
| ATOM | 1303 | C8  | A A | 62 | -3.695 | -24.282 | 109.284 | 0.00nan0x7fffffff |
| ATOM | 1304 | N7  | A A | 62 | -2.539 | -24.881 | 109.144 | 0.00nan0x7fffffff |
| ATOM | 1305 | C5  | A A | 62 | -1.614 | -23.898 | 109.485 | 0.00nan0x7fffffff |
| ATOM | 1306 | N6  | A A | 62 | 0.540  | -24.978 | 109.235 | 0.00nan0x7fffffff |
| ATOM | 1307 | C6  | A A | 62 | -0.200 | -23.919 | 109.535 | 0.00nan0x7fffffff |
| ATOM | 1308 | N1  | A A | 62 | 0.383  | -22.745 | 109.922 | 0.00nan0x7fffffff |
| ATOM | 1309 | C2  | A A | 62 | -0.358 | -21.646 | 110.230 | 0.00nan0x7fffffff |
| ATOM | 1310 | N3  | A A | 62 | -1.686 | -21.561 | 110.207 | 0.00nan0x7fffffff |
| ATOM | 1311 | C4  | A A | 62 | -2.252 | -22.724 | 109.825 | 0.00nan0x7fffffff |
| ATOM | 1312 | O3* | A A | 62 | -6.843 | -20.986 | 107.200 | 0.00nan0x7fffffff |
| ATOM | 1313 | P   | A A | 63 | -6.561 | -21.010 | 105.618 | 0.00nan0x7fffffff |
| ATOM | 1314 | O1P | A A | 63 | -7.828 | -20.509 | 105.030 | 0.00nan0x7fffffff |
| ATOM | 1315 | O2P | A A | 63 | -6.219 | -22.390 | 105.151 | 0.00nan0x7fffffff |
| ATOM | 1316 | O5* | A A | 63 | -5.317 | -20.015 | 105.451 | 0.00nan0x7fffffff |
| ATOM | 1317 | C5* | A A | 63 | -5.340 | -18.708 | 106.078 | 0.00nan0x7fffffff |
| ATOM | 1318 | C4* | A A | 63 | -3.909 | -18.247 | 106.222 | 0.00nan0x7fffffff |
| ATOM | 1319 | C3* | A A | 63 | -3.018 | -18.428 | 105.005 | 0.00nan0x7fffffff |
| ATOM | 1320 | O4* | A A | 63 | -3.268 | -19.033 | 107.253 | 0.00nan0x7fffffff |
| ATOM | 1321 | O2* | A A | 63 | -1.222 | -17.138 | 105.869 | 0.00nan0x7fffffff |
| ATOM | 1322 | C2* | A A | 63 | -1.629 | -18.478 | 105.638 | 0.00nan0x7fffffff |
| ATOM | 1323 | C1* | A A | 63 | -1.904 | -19.205 | 106.947 | 0.00nan0x7fffffff |
| ATOM | 1324 | N9  | A A | 63 | -1.537 | -20.626 | 106.785 | 0.00nan0x7fffffff |
| ATOM | 1325 | C8  | A A | 63 | -2.369 | -21.700 | 106.603 | 0.00nan0x7fffffff |
| ATOM | 1326 | N7  | A A | 63 | -1.741 | -22.846 | 106.509 | 0.00nan0x7fffffff |
| ATOM | 1327 | C5  | A A | 63 | -0.400 | -22.500 | 106.648 | 0.00nan0x7fffffff |
| ATOM | 1328 | N6  | A A | 63 | 0.789  | -24.604 | 106.479 | 0.00nan0x7fffffff |
| ATOM | 1329 | C6  | A A | 63 | 0.776  | -23.287 | 106.638 | 0.00nan0x7fffffff |
| ATOM | 1330 | N1  | A A | 63 | 1.940  | -22.591 | 106.806 | 0.00nan0x7fffffff |
| ATOM | 1331 | C2  | A A | 63 | 1.948  | -21.240 | 106.971 | 0.00nan0x7fffffff |
| ATOM | 1332 | N3  | A A | 63 | 0.881  | -20.444 | 106.990 | 0.00nan0x7fffffff |
| ATOM | 1333 | C4  | A A | 63 | -0.262 | -21.140 | 106.823 | 0.00nan0x7fffffff |
| ATOM | 1334 | O3* | A A | 63 | -3.151 | -17.370 | 104.051 | 0.00nan0x7fffffff |
| ATOM | 1335 | P   | G A | 64 | -2.991 | -17.662 | 102.479 | 0.00nan0x7fffffff |
| ATOM | 1336 | O1P | G A | 64 | -3.874 | -16.651 | 101.845 | 0.00nan0x7fffffff |
| ATOM | 1337 | O2P | G A | 64 | -3.397 | -19.064 | 102.146 | 0.00nan0x7fffffff |
| ATOM | 1338 | O5* | G A | 64 | -1.429 | -17.432 | 102.216 | 0.00nan0x7fffffff |
| ATOM | 1339 | C5* | G A | 64 | -0.759 | -16.262 | 102.752 | 0.00nan0x7fffffff |
| ATOM | 1340 | C4* | G A | 64 | 0.716  | -16.581 | 102.824 | 0.00nan0x7fffffff |
| ATOM | 1341 | C3* | G A | 64 | 1.293  | -17.348 | 101.647 | 0.00nan0x7fffffff |
| ATOM | 1342 | O4* | G A | 64 | 0.948  | -17.446 | 103.960 | 0.00nan0x7fffffff |
| ATOM | 1343 | O2* | G A | 64 | 3.556  | -17.069 | 102.307 | 0.00nan0x7fffffff |

|      |      |     |     |    |       |         |         |                   |
|------|------|-----|-----|----|-------|---------|---------|-------------------|
| ATOM | 1344 | C2* | G A | 64 | 2.507 | -18.026 | 102.277 | 0.00nan0x7fffffff |
| ATOM | 1345 | C1* | G A | 64 | 2.004 | -18.335 | 103.680 | 0.00nan0x7fffffff |
| ATOM | 1346 | N9  | G A | 64 | 1.571 | -19.747 | 103.720 | 0.00nan0x7fffffff |
| ATOM | 1347 | C8  | G A | 64 | 0.295 | -20.241 | 103.638 | 0.00nan0x7fffffff |
| ATOM | 1348 | N7  | G A | 64 | 0.229 | -21.546 | 103.716 | 0.00nan0x7fffffff |
| ATOM | 1349 | C5  | G A | 64 | 1.557 | -21.939 | 103.865 | 0.00nan0x7fffffff |
| ATOM | 1350 | O6  | G A | 64 | 1.573 | -24.315 | 104.018 | 0.00nan0x7fffffff |
| ATOM | 1351 | C6  | G A | 64 | 2.146 | -23.223 | 104.002 | 0.00nan0x7fffffff |
| ATOM | 1352 | N1  | G A | 64 | 3.512 | -23.206 | 104.129 | 0.00nan0x7fffffff |
| ATOM | 1353 | N2  | G A | 64 | 5.556 | -22.212 | 104.255 | 0.00nan0x7fffffff |
| ATOM | 1354 | C2  | G A | 64 | 4.233 | -22.052 | 104.122 | 0.00nan0x7fffffff |
| ATOM | 1355 | N3  | G A | 64 | 3.732 | -20.824 | 103.996 | 0.00nan0x7fffffff |
| ATOM | 1356 | C4  | G A | 64 | 2.390 | -20.841 | 103.872 | 0.00nan0x7fffffff |
| ATOM | 1357 | O3* | G A | 64 | 1.641 | -16.510 | 100.541 | 0.00nan0x7fffffff |
| ATOM | 1358 | P   | U A | 65 | 1.469 | -17.031 | 99.029  | 0.00nan0x7fffffff |
| ATOM | 1359 | O1P | U A | 65 | 1.222 | -15.785 | 98.260  | 0.00nan0x7fffffff |
| ATOM | 1360 | O2P | U A | 65 | 0.336 | -18.002 | 98.921  | 0.00nan0x7fffffff |
| ATOM | 1361 | O5* | U A | 65 | 2.870 | -17.734 | 98.716  | 0.00nan0x7fffffff |
| ATOM | 1362 | C5* | U A | 65 | 4.114 | -17.031 | 98.964  | 0.00nan0x7fffffff |
| ATOM | 1363 | C4* | U A | 65 | 5.205 | -18.069 | 99.074  | 0.00nan0x7fffffff |
| ATOM | 1364 | C3* | U A | 65 | 5.247 | -19.118 | 97.976  | 0.00nan0x7fffffff |
| ATOM | 1365 | O4* | U A | 65 | 5.003 | -18.831 | 100.286 | 0.00nan0x7fffffff |
| ATOM | 1366 | O2* | U A | 65 | 7.353 | -20.006 | 98.618  | 0.00nan0x7fffffff |
| ATOM | 1367 | C2* | U A | 65 | 5.959 | -20.274 | 98.673  | 0.00nan0x7fffffff |
| ATOM | 1368 | C1* | U A | 65 | 5.432 | -20.159 | 100.097 | 0.00nan0x7fffffff |
| ATOM | 1369 | N1  | U A | 65 | 4.334 | -21.135 | 100.269 | 0.00nan0x7fffffff |
| ATOM | 1370 | C6  | U A | 65 | 3.027 | -20.759 | 100.370 | 0.00nan0x7fffffff |
| ATOM | 1371 | C5  | U A | 65 | 2.033 | -21.645 | 100.535 | 0.00nan0x7fffffff |
| ATOM | 1372 | O4  | U A | 65 | 1.535 | -23.953 | 100.763 | 0.00nan0x7fffffff |
| ATOM | 1373 | C4  | U A | 65 | 2.381 | -23.024 | 100.610 | 0.00nan0x7fffffff |
| ATOM | 1374 | N3  | U A | 65 | 3.692 | -23.386 | 100.512 | 0.00nan0x7fffffff |
| ATOM | 1375 | O2  | U A | 65 | 5.868 | -22.817 | 100.259 | 0.00nan0x7fffffff |
| ATOM | 1376 | C2  | U A | 65 | 4.692 | -22.472 | 100.345 | 0.00nan0x7fffffff |
| ATOM | 1377 | O3* | U A | 65 | 5.931 | -18.679 | 96.799  | 0.00nan0x7fffffff |
| ATOM | 1378 | P   | A A | 66 | 5.443 | -19.149 | 95.340  | 0.00nan0x7fffffff |
| ATOM | 1379 | O1P | A A | 66 | 6.028 | -18.128 | 94.434  | 0.00nan0x7fffffff |
| ATOM | 1380 | O2P | A A | 66 | 3.949 | -19.191 | 95.261  | 0.00nan0x7fffffff |
| ATOM | 1381 | O5* | A A | 66 | 6.075 | -20.609 | 95.185  | 0.00nan0x7fffffff |
| ATOM | 1382 | C5* | A A | 66 | 7.513 | -20.796 | 95.195  | 0.00nan0x7fffffff |
| ATOM | 1383 | C4* | A A | 66 | 7.777 | -22.238 | 95.559  | 0.00nan0x7fffffff |
| ATOM | 1384 | C3* | A A | 66 | 7.329 | -23.279 | 94.548  | 0.00nan0x7fffffff |
| ATOM | 1385 | O4* | A A | 66 | 7.029 | -22.557 | 96.755  | 0.00nan0x7fffffff |
| ATOM | 1386 | O2* | A A | 66 | 8.423 | -25.097 | 95.612  | 0.00nan0x7fffffff |
| ATOM | 1387 | C2* | A A | 66 | 7.142 | -24.513 | 95.428  | 0.00nan0x7fffffff |
| ATOM | 1388 | C1* | A A | 66 | 6.622 | -23.905 | 96.722  | 0.00nan0x7fffffff |
| ATOM | 1389 | N9  | A A | 66 | 5.154 | -24.052 | 96.766  | 0.00nan0x7fffffff |
| ATOM | 1390 | C8  | A A | 66 | 4.203 | -23.065 | 96.752  | 0.00nan0x7fffffff |
| ATOM | 1391 | N7  | A A | 66 | 2.975 | -23.510 | 96.838  | 0.00nan0x7fffffff |
| ATOM | 1392 | C5  | A A | 66 | 3.130 | -24.890 | 96.930  | 0.00nan0x7fffffff |
| ATOM | 1393 | N6  | A A | 66 | 0.869 | -25.745 | 97.090  | 0.00nan0x7fffffff |
| ATOM | 1394 | C6  | A A | 66 | 2.181 | -25.934 | 97.047  | 0.00nan0x7fffffff |
| ATOM | 1395 | N1  | A A | 66 | 2.710 | -27.192 | 97.114  | 0.00nan0x7fffffff |
| ATOM | 1396 | C2  | A A | 66 | 4.053 | -27.407 | 97.070  | 0.00nan0x7fffffff |
| ATOM | 1397 | N3  | A A | 66 | 4.995 | -26.473 | 96.954  | 0.00nan0x7fffffff |
| ATOM | 1398 | C4  | A A | 66 | 4.464 | -25.235 | 96.897  | 0.00nan0x7fffffff |
| ATOM | 1399 | O3* | A A | 66 | 8.286 | -23.489 | 93.505  | 0.00nan0x7fffffff |
| ATOM | 1400 | P   | U A | 67 | 7.819 | -23.872 | 92.019  | 0.00nan0x7fffffff |
| ATOM | 1401 | O1P | U A | 67 | 8.749 | -23.104 | 91.151  | 0.00nan0x7fffffff |
| ATOM | 1402 | O2P | U A | 67 | 6.387 | -23.496 | 91.788  | 0.00nan0x7fffffff |
| ATOM | 1403 | O5* | U A | 67 | 8.018 | -25.456 | 91.958  | 0.00nan0x7fffffff |
| ATOM | 1404 | C5* | U A | 67 | 7.510 | -26.228 | 90.843  | 0.00nan0x7fffffff |
| ATOM | 1405 | C4* | U A | 67 | 7.330 | -27.653 | 91.309  | 0.00nan0x7fffffff |
| ATOM | 1406 | C3* | U A | 67 | 6.327 | -28.485 | 90.526  | 0.00nan0x7fffffff |
| ATOM | 1407 | O4* | U A | 67 | 6.809 | -27.647 | 92.657  | 0.00nan0x7fffffff |

|      |      |     |     |    |        |         |        |                   |
|------|------|-----|-----|----|--------|---------|--------|-------------------|
| ATOM | 1408 | O2* | U A | 67 | 6.939  | -30.544 | 91.537 | 0.00nan0x7fffffff |
| ATOM | 1409 | C2* | U A | 67 | 5.930  | -29.544 | 91.551 | 0.00nan0x7fffffff |
| ATOM | 1410 | C1* | U A | 67 | 5.958  | -28.753 | 92.852 | 0.00nan0x7fffffff |
| ATOM | 1411 | N1  | U A | 67 | 4.577  | -28.335 | 93.179 | 0.00nan0x7fffffff |
| ATOM | 1412 | C6  | U A | 67 | 4.235  | -27.026 | 93.354 | 0.00nan0x7fffffff |
| ATOM | 1413 | C5  | U A | 67 | 2.985  | -26.642 | 93.653 | 0.00nan0x7fffffff |
| ATOM | 1414 | O4  | U A | 67 | 0.784  | -27.422 | 94.071 | 0.00nan0x7fffffff |
| ATOM | 1415 | C4  | U A | 67 | 1.996  | -27.658 | 93.792 | 0.00nan0x7fffffff |
| ATOM | 1416 | N3  | U A | 67 | 2.353  | -28.963 | 93.618 | 0.00nan0x7fffffff |
| ATOM | 1417 | O2  | U A | 67 | 3.935  | -30.517 | 93.161 | 0.00nan0x7fffffff |
| ATOM | 1418 | C2  | U A | 67 | 3.631  | -29.337 | 93.317 | 0.00nan0x7fffffff |
| ATOM | 1419 | O3* | U A | 67 | 6.864  | -29.053 | 89.328 | 0.00nan0x7fffffff |
| ATOM | 1420 | P   | G A | 68 | 5.990  | -29.142 | 87.977 | 0.00nan0x7fffffff |
| ATOM | 1421 | O1P | G A | 68 | 7.020  | -29.114 | 86.905 | 0.00nan0x7fffffff |
| ATOM | 1422 | O2P | G A | 68 | 5.046  | -27.982 | 87.880 | 0.00nan0x7fffffff |
| ATOM | 1423 | O5* | G A | 68 | 5.208  | -30.521 | 88.110 | 0.00nan0x7fffffff |
| ATOM | 1424 | C5* | G A | 68 | 5.934  | -31.778 | 88.084 | 0.00nan0x7fffffff |
| ATOM | 1425 | C4* | G A | 68 | 4.950  | -32.857 | 88.467 | 0.00nan0x7fffffff |
| ATOM | 1426 | C3* | G A | 68 | 3.663  | -32.907 | 87.661 | 0.00nan0x7fffffff |
| ATOM | 1427 | O4* | G A | 68 | 4.509  | -32.626 | 89.825 | 0.00nan0x7fffffff |
| ATOM | 1428 | O2* | G A | 68 | 2.958  | -34.996 | 88.542 | 0.00nan0x7fffffff |
| ATOM | 1429 | C2* | G A | 68 | 2.712  | -33.601 | 88.634 | 0.00nan0x7fffffff |
| ATOM | 1430 | C1* | G A | 68 | 3.174  | -33.047 | 89.975 | 0.00nan0x7fffffff |
| ATOM | 1431 | N9  | G A | 68 | 2.274  | -31.936 | 90.349 | 0.00nan0x7fffffff |
| ATOM | 1432 | C8  | G A | 68 | 2.574  | -30.603 | 90.454 | 0.00nan0x7fffffff |
| ATOM | 1433 | N7  | G A | 68 | 1.556  | -29.859 | 90.803 | 0.00nan0x7fffffff |
| ATOM | 1434 | C5  | G A | 68 | 0.509  | -30.768 | 90.935 | 0.00nan0x7fffffff |
| ATOM | 1435 | O6  | G A | 68 | -1.421 | -29.528 | 91.574 | 0.00nan0x7fffffff |
| ATOM | 1436 | C6  | G A | 68 | -0.854 | -30.585 | 91.287 | 0.00nan0x7fffffff |
| ATOM | 1437 | N1  | G A | 68 | -1.590 | -31.742 | 91.315 | 0.00nan0x7fffffff |
| ATOM | 1438 | N2  | G A | 68 | -1.909 | -33.986 | 91.089 | 0.00nan0x7fffffff |
| ATOM | 1439 | C2  | G A | 68 | -1.054 | -32.958 | 91.020 | 0.00nan0x7fffffff |
| ATOM | 1440 | N3  | G A | 68 | 0.215  | -33.184 | 90.680 | 0.00nan0x7fffffff |
| ATOM | 1441 | C4  | G A | 68 | 0.938  | -32.047 | 90.657 | 0.00nan0x7fffffff |
| ATOM | 1442 | O3* | G A | 68 | 3.787  | -33.606 | 86.420 | 0.00nan0x7fffffff |
| ATOM | 1443 | P   | A A | 69 | 3.012  | -33.094 | 85.103 | 0.00nan0x7fffffff |
| ATOM | 1444 | O1P | A A | 69 | 3.761  | -33.742 | 83.994 | 0.00nan0x7fffffff |
| ATOM | 1445 | O2P | A A | 69 | 3.054  | -31.598 | 85.012 | 0.00nan0x7fffffff |
| ATOM | 1446 | O5* | A A | 69 | 1.525  | -33.625 | 85.298 | 0.00nan0x7fffffff |
| ATOM | 1447 | C5* | A A | 69 | 1.261  | -35.052 | 85.279 | 0.00nan0x7fffffff |
| ATOM | 1448 | C4* | A A | 69 | -0.191 | -35.234 | 85.646 | 0.00nan0x7fffffff |
| ATOM | 1449 | C3* | A A | 69 | -1.199 | -34.445 | 84.827 | 0.00nan0x7fffffff |
| ATOM | 1450 | O4* | A A | 69 | -0.396 | -34.773 | 87.001 | 0.00nan0x7fffffff |
| ATOM | 1451 | O2* | A A | 69 | -3.094 | -35.590 | 85.684 | 0.00nan0x7fffffff |
| ATOM | 1452 | C2* | A A | 69 | -2.385 | -34.364 | 85.785 | 0.00nan0x7fffffff |
| ATOM | 1453 | C1* | A A | 69 | -1.692 | -34.239 | 87.136 | 0.00nan0x7fffffff |
| ATOM | 1454 | N9  | A A | 69 | -1.683 | -32.814 | 87.524 | 0.00nan0x7fffffff |
| ATOM | 1455 | C8  | A A | 69 | -0.609 | -31.968 | 87.619 | 0.00nan0x7fffffff |
| ATOM | 1456 | N7  | A A | 69 | -0.924 | -30.753 | 87.997 | 0.00nan0x7fffffff |
| ATOM | 1457 | C5  | A A | 69 | -2.304 | -30.807 | 88.164 | 0.00nan0x7fffffff |
| ATOM | 1458 | N6  | A A | 69 | -2.918 | -28.571 | 88.865 | 0.00nan0x7fffffff |
| ATOM | 1459 | C6  | A A | 69 | -3.239 | -29.821 | 88.561 | 0.00nan0x7fffffff |
| ATOM | 1460 | N1  | A A | 69 | -4.538 | -30.243 | 88.615 | 0.00nan0x7fffffff |
| ATOM | 1461 | C2  | A A | 69 | -4.889 | -31.521 | 88.307 | 0.00nan0x7fffffff |
| ATOM | 1462 | N3  | A A | 69 | -4.061 | -32.494 | 87.928 | 0.00nan0x7fffffff |
| ATOM | 1463 | C4  | A A | 69 | -2.783 | -32.068 | 87.878 | 0.00nan0x7fffffff |
| ATOM | 1464 | O3* | A A | 69 | -1.538 | -35.066 | 83.584 | 0.00nan0x7fffffff |
| ATOM | 1465 | P   | A A | 70 | -1.806 | -34.181 | 82.266 | 0.00nan0x7fffffff |
| ATOM | 1466 | O1P | A A | 70 | -1.424 | -35.096 | 81.158 | 0.00nan0x7fffffff |
| ATOM | 1467 | O2P | A A | 70 | -0.973 | -32.936 | 82.282 | 0.00nan0x7fffffff |
| ATOM | 1468 | O5* | A A | 70 | -3.361 | -33.843 | 82.339 | 0.00nan0x7fffffff |
| ATOM | 1469 | C5* | A A | 70 | -4.330 | -34.908 | 82.517 | 0.00nan0x7fffffff |
| ATOM | 1470 | C4* | A A | 70 | -5.644 | -34.254 | 82.870 | 0.00nan0x7fffffff |
| ATOM | 1471 | C3* | A A | 70 | -6.040 | -33.046 | 82.038 | 0.00nan0x7fffffff |

|      |      |     |     |    |         |         |        |                   |
|------|------|-----|-----|----|---------|---------|--------|-------------------|
| ATOM | 1472 | O4* | A A | 70 | -5.567  | -33.745 | 84.221 | 0.00nan0x7fffffff |
| ATOM | 1473 | O2* | A A | 70 | -8.256  | -32.935 | 82.882 | 0.00nan0x7fffffff |
| ATOM | 1474 | C2* | A A | 70 | -6.985  | -32.310 | 82.985 | 0.00nan0x7fffffff |
| ATOM | 1475 | C1* | A A | 70 | -6.347  | -32.579 | 84.341 | 0.00nan0x7fffffff |
| ATOM | 1476 | N9  | A A | 70 | -5.545  | -31.399 | 84.723 | 0.00nan0x7fffffff |
| ATOM | 1477 | C8  | A A | 70 | -4.182  | -31.292 | 84.810 | 0.00nan0x7fffffff |
| ATOM | 1478 | N7  | A A | 70 | -3.766  | -30.108 | 85.186 | 0.00nan0x7fffffff |
| ATOM | 1479 | C5  | A A | 70 | -4.942  | -29.386 | 85.363 | 0.00nan0x7fffffff |
| ATOM | 1480 | N6  | A A | 70 | -4.205  | -27.187 | 86.061 | 0.00nan0x7fffffff |
| ATOM | 1481 | C6  | A A | 70 | -5.168  | -28.048 | 85.763 | 0.00nan0x7fffffff |
| ATOM | 1482 | N1  | A A | 70 | -6.483  | -27.677 | 85.828 | 0.00nan0x7fffffff |
| ATOM | 1483 | C2  | A A | 70 | -7.487  | -28.545 | 85.526 | 0.00nan0x7fffffff |
| ATOM | 1484 | N3  | A A | 70 | -7.342  | -29.812 | 85.145 | 0.00nan0x7fffffff |
| ATOM | 1485 | C4  | A A | 70 | -6.043  | -30.168 | 85.084 | 0.00nan0x7fffffff |
| ATOM | 1486 | O3* | A A | 70 | -6.662  | -33.387 | 80.796 | 0.00nan0x7fffffff |
| ATOM | 1487 | P   | G A | 71 | -6.390  | -32.521 | 79.468 | 0.00nan0x7fffffff |
| ATOM | 1488 | O1P | G A | 71 | -6.544  | -33.515 | 78.373 | 0.00nan0x7fffffff |
| ATOM | 1489 | O2P | G A | 71 | -5.019  | -31.918 | 79.495 | 0.00nan0x7fffffff |
| ATOM | 1490 | O5* | G A | 71 | -7.521  | -31.397 | 79.504 | 0.00nan0x7fffffff |
| ATOM | 1491 | C5* | G A | 71 | -8.906  | -31.763 | 79.731 | 0.00nan0x7fffffff |
| ATOM | 1492 | C4* | G A | 71 | -9.648  | -30.493 | 80.072 | 0.00nan0x7fffffff |
| ATOM | 1493 | C3* | G A | 71 | -9.311  | -29.272 | 79.232 | 0.00nan0x7fffffff |
| ATOM | 1494 | O4* | G A | 71 | -9.307  | -30.100 | 81.422 | 0.00nan0x7fffffff |
| ATOM | 1495 | O2* | G A | 71 | -11.103 | -27.953 | 80.062 | 0.00nan0x7fffffff |
| ATOM | 1496 | C2* | G A | 71 | -9.698  | -28.130 | 80.170 | 0.00nan0x7fffffff |
| ATOM | 1497 | C1* | G A | 71 | -9.317  | -28.696 | 81.531 | 0.00nan0x7fffffff |
| ATOM | 1498 | N9  | G A | 71 | -7.997  | -28.152 | 81.911 | 0.00nan0x7fffffff |
| ATOM | 1499 | C8  | G A | 71 | -6.801  | -28.817 | 81.994 | 0.00nan0x7fffffff |
| ATOM | 1500 | N7  | G A | 71 | -5.802  | -28.059 | 82.370 | 0.00nan0x7fffffff |
| ATOM | 1501 | C5  | G A | 71 | -6.383  | -26.807 | 82.551 | 0.00nan0x7fffffff |
| ATOM | 1502 | O6  | G A | 71 | -4.654  | -25.323 | 83.243 | 0.00nan0x7fffffff |
| ATOM | 1503 | C6  | G A | 71 | -5.828  | -25.564 | 82.954 | 0.00nan0x7fffffff |
| ATOM | 1504 | N1  | G A | 71 | -6.734  | -24.536 | 83.018 | 0.00nan0x7fffffff |
| ATOM | 1505 | N2  | G A | 71 | -8.801  | -23.597 | 82.832 | 0.00nan0x7fffffff |
| ATOM | 1506 | C2  | G A | 71 | -8.052  | -24.701 | 82.719 | 0.00nan0x7fffffff |
| ATOM | 1507 | N3  | G A | 71 | -8.623  | -25.843 | 82.337 | 0.00nan0x7fffffff |
| ATOM | 1508 | C4  | G A | 71 | -7.732  | -26.852 | 82.274 | 0.00nan0x7fffffff |
| ATOM | 1509 | O3* | G A | 71 | -10.015 | -29.224 | 77.988 | 0.00nan0x7fffffff |
| ATOM | 1510 | P   | A A | 72 | -9.309  | -28.657 | 76.658 | 0.00nan0x7fffffff |
| ATOM | 1511 | O1P | A A | 72 | -9.965  | -29.426 | 75.568 | 0.00nan0x7fffffff |
| ATOM | 1512 | O2P | A A | 72 | -7.829  | -28.885 | 76.700 | 0.00nan0x7fffffff |
| ATOM | 1513 | O5* | A A | 72 | -9.659  | -27.101 | 76.673 | 0.00nan0x7fffffff |
| ATOM | 1514 | C5* | A A | 72 | -11.021 | -26.660 | 76.909 | 0.00nan0x7fffffff |
| ATOM | 1515 | C4* | A A | 72 | -10.958 | -25.191 | 77.253 | 0.00nan0x7fffffff |
| ATOM | 1516 | C3* | A A | 72 | -10.013 | -24.347 | 76.416 | 0.00nan0x7fffffff |
| ATOM | 1517 | O4* | A A | 72 | -10.462 | -25.048 | 78.603 | 0.00nan0x7fffffff |
| ATOM | 1518 | O2* | A A | 72 | -10.806 | -22.269 | 77.247 | 0.00nan0x7fffffff |
| ATOM | 1519 | C2* | A A | 72 | -9.721  | -23.179 | 77.356 | 0.00nan0x7fffffff |
| ATOM | 1520 | C1* | A A | 72 | -9.710  | -23.863 | 78.716 | 0.00nan0x7fffffff |
| ATOM | 1521 | N9  | A A | 72 | -8.306  | -24.121 | 79.098 | 0.00nan0x7fffffff |
| ATOM | 1522 | C8  | A A | 72 | -7.659  | -25.326 | 79.180 | 0.00nan0x7fffffff |
| ATOM | 1523 | N7  | A A | 72 | -6.408  | -25.230 | 79.557 | 0.00nan0x7fffffff |
| ATOM | 1524 | C5  | A A | 72 | -6.222  | -23.863 | 79.738 | 0.00nan0x7fffffff |
| ATOM | 1525 | N6  | A A | 72 | -3.912  | -23.654 | 80.437 | 0.00nan0x7fffffff |
| ATOM | 1526 | C6  | A A | 72 | -5.088  | -23.118 | 80.141 | 0.00nan0x7fffffff |
| ATOM | 1527 | N1  | A A | 72 | -5.279  | -21.766 | 80.210 | 0.00nan0x7fffffff |
| ATOM | 1528 | C2  | A A | 72 | -6.477  | -21.196 | 79.910 | 0.00nan0x7fffffff |
| ATOM | 1529 | N3  | A A | 72 | -7.579  | -21.838 | 79.526 | 0.00nan0x7fffffff |
| ATOM | 1530 | C4  | A A | 72 | -7.381  | -23.170 | 79.461 | 0.00nan0x7fffffff |
| ATOM | 1531 | O3* | A A | 72 | -10.576 | -23.923 | 75.171 | 0.00nan0x7fffffff |
| ATOM | 1532 | P   | A A | 73 | -9.672  | -23.827 | 73.843 | 0.00nan0x7fffffff |
| ATOM | 1533 | O1P | A A | 73 | -10.636 | -24.118 | 72.750 | 0.00nan0x7fffffff |
| ATOM | 1534 | O2P | A A | 73 | -8.551  | -24.820 | 73.888 | 0.00nan0x7fffffff |
| ATOM | 1535 | O5* | A A | 73 | -9.124  | -22.329 | 73.861 | 0.00nan0x7fffffff |



|      |      |     |     |    |         |         |        |                   |
|------|------|-----|-----|----|---------|---------|--------|-------------------|
| ATOM | 1536 | C5* | A A | 73 | -10.029 | -21.223 | 74.107 | 0.00nan0x7fffffff |
| ATOM | 1537 | C4* | A A | 73 | -9.179  | -20.023 | 74.450 | 0.00nan0x7fffffff |
| ATOM | 1538 | C3* | A A | 73 | -7.928  | -19.825 | 73.611 | 0.00nan0x7fffffff |
| ATOM | 1539 | O4* | A A | 73 | -8.682  | -20.172 | 75.799 | 0.00nan0x7fffffff |
| ATOM | 1540 | O2* | A A | 73 | -7.468  | -17.649 | 74.443 | 0.00nan0x7fffffff |
| ATOM | 1541 | C2* | A A | 73 | -7.049  | -19.002 | 74.550 | 0.00nan0x7fffffff |
| ATOM | 1542 | C1* | A A | 73 | -7.408  | -19.583 | 75.911 | 0.00nan0x7fffffff |
| ATOM | 1543 | N9  | A A | 73 | -6.367  | -20.560 | 76.291 | 0.00nan0x7fffffff |
| ATOM | 1544 | C8  | A A | 73 | -6.474  | -21.924 | 76.373 | 0.00nan0x7fffffff |
| ATOM | 1545 | N7  | A A | 73 | -5.370  | -22.520 | 76.749 | 0.00nan0x7fffffff |
| ATOM | 1546 | C5  | A A | 73 | -4.474  | -21.471 | 76.932 | 0.00nan0x7fffffff |
| ATOM | 1547 | N6  | A A | 73 | -2.418  | -22.545 | 77.631 | 0.00nan0x7fffffff |
| ATOM | 1548 | C6  | A A | 73 | -3.118  | -21.457 | 77.335 | 0.00nan0x7fffffff |
| ATOM | 1549 | N1  | A A | 73 | -2.547  | -20.217 | 77.405 | 0.00nan0x7fffffff |
| ATOM | 1550 | C2  | A A | 73 | -3.247  | -19.089 | 77.105 | 0.00nan0x7fffffff |
| ATOM | 1551 | N3  | A A | 73 | -4.521  | -19.034 | 76.722 | 0.00nan0x7fffffff |
| ATOM | 1552 | C4  | A A | 73 | -5.075  | -20.261 | 76.656 | 0.00nan0x7fffffff |
| ATOM | 1553 | O3* | A A | 73 | -8.174  | -19.163 | 72.367 | 0.00nan0x7fffffff |
| ATOM | 1554 | P   | G A | 74 | -7.364  | -19.570 | 71.038 | 0.00nan0x7fffffff |
| ATOM | 1555 | O1P | G A | 74 | -8.336  | -19.299 | 69.947 | 0.00nan0x7fffffff |
| ATOM | 1556 | O2P | G A | 74 | -6.952  | -21.010 | 71.084 | 0.00nan0x7fffffff |
| ATOM | 1557 | O5* | G A | 74 | -6.097  | -18.601 | 71.051 | 0.00nan0x7fffffff |
| ATOM | 1558 | C5* | G A | 74 | -6.265  | -17.182 | 71.302 | 0.00nan0x7fffffff |
| ATOM | 1559 | C4* | G A | 74 | -4.902  | -16.627 | 71.641 | 0.00nan0x7fffffff |
| ATOM | 1560 | C3* | G A | 74 | -3.743  | -17.135 | 70.800 | 0.00nan0x7fffffff |
| ATOM | 1561 | O4* | G A | 74 | -4.560  | -17.018 | 72.990 | 0.00nan0x7fffffff |
| ATOM | 1562 | O2* | G A | 74 | -2.183  | -15.547 | 71.626 | 0.00nan0x7fffffff |
| ATOM | 1563 | C2* | G A | 74 | -2.557  | -16.912 | 71.736 | 0.00nan0x7fffffff |
| ATOM | 1564 | C1* | G A | 74 | -3.169  | -17.208 | 73.098 | 0.00nan0x7fffffff |
| ATOM | 1565 | N9  | G A | 74 | -2.817  | -18.591 | 73.479 | 0.00nan0x7fffffff |
| ATOM | 1566 | C8  | G A | 74 | -3.644  | -19.681 | 73.561 | 0.00nan0x7fffffff |
| ATOM | 1567 | N7  | G A | 74 | -3.036  | -20.778 | 73.936 | 0.00nan0x7fffffff |
| ATOM | 1568 | C5  | G A | 74 | -1.713  | -20.379 | 74.118 | 0.00nan0x7fffffff |
| ATOM | 1569 | O6  | G A | 74 | -0.489  | -22.301 | 74.810 | 0.00nan0x7fffffff |
| ATOM | 1570 | C6  | G A | 74 | -0.562  | -21.104 | 74.521 | 0.00nan0x7fffffff |
| ATOM | 1571 | N1  | G A | 74 | 0.584   | -20.353 | 74.586 | 0.00nan0x7fffffff |
| ATOM | 1572 | N2  | G A | 74 | 1.805   | -18.440 | 74.401 | 0.00nan0x7fffffff |
| ATOM | 1573 | C2  | G A | 74 | 0.607   | -19.025 | 74.288 | 0.00nan0x7fffffff |
| ATOM | 1574 | N3  | G A | 74 | -0.443  | -18.298 | 73.905 | 0.00nan0x7fffffff |
| ATOM | 1575 | C4  | G A | 74 | -1.568  | -19.037 | 73.842 | 0.00nan0x7fffffff |
| ATOM | 1576 | O3* | G A | 74 | -3.598  | -16.447 | 69.555 | 0.00nan0x7fffffff |
| ATOM | 1577 | P   | A A | 75 | -3.137  | -17.228 | 68.226 | 0.00nan0x7fffffff |
| ATOM | 1578 | O1P | A A | 75 | -3.809  | -16.475 | 67.134 | 0.00nan0x7fffffff |
| ATOM | 1579 | O2P | A A | 75 | -3.570  | -18.662 | 68.273 | 0.00nan0x7fffffff |
| ATOM | 1580 | O5* | A A | 75 | -1.548  | -17.099 | 68.237 | 0.00nan0x7fffffff |
| ATOM | 1581 | C5* | A A | 75 | -0.921  | -15.814 | 68.479 | 0.00nan0x7fffffff |
| ATOM | 1582 | C4* | A A | 75 | 0.525   | -16.083 | 68.821 | 0.00nan0x7fffffff |
| ATOM | 1583 | C3* | A A | 75 | 1.227   | -17.139 | 67.984 | 0.00nan0x7fffffff |
| ATOM | 1584 | O4* | A A | 75 | 0.599   | -16.593 | 70.172 | 0.00nan0x7fffffff |
| ATOM | 1585 | O2* | A A | 75 | 3.397   | -16.645 | 68.812 | 0.00nan0x7fffffff |
| ATOM | 1586 | C2* | A A | 75 | 2.344   | -17.591 | 68.922 | 0.00nan0x7fffffff |
| ATOM | 1587 | C1* | A A | 75 | 1.667   | -17.505 | 70.284 | 0.00nan0x7fffffff |
| ATOM | 1588 | N9  | A A | 75 | 1.214   | -18.858 | 70.666 | 0.00nan0x7fffffff |
| ATOM | 1589 | C8  | A A | 75 | -0.070  | -19.330 | 70.749 | 0.00nan0x7fffffff |
| ATOM | 1590 | N7  | A A | 75 | -0.150  | -20.582 | 71.126 | 0.00nan0x7fffffff |
| ATOM | 1591 | C5  | A A | 75 | 1.177   | -20.958 | 71.307 | 0.00nan0x7fffffff |
| ATOM | 1592 | N6  | A A | 75 | 1.060   | -23.274 | 72.007 | 0.00nan0x7fffffff |
| ATOM | 1593 | C6  | A A | 75 | 1.756   | -22.185 | 71.710 | 0.00nan0x7fffffff |
| ATOM | 1594 | N1  | A A | 75 | 3.121   | -22.186 | 71.779 | 0.00nan0x7fffffff |
| ATOM | 1595 | C2  | A A | 75 | 3.853   | -21.079 | 71.479 | 0.00nan0x7fffffff |
| ATOM | 1596 | N3  | A A | 75 | 3.372   | -19.899 | 71.095 | 0.00nan0x7fffffff |
| ATOM | 1597 | C4  | A A | 75 | 2.026   | -19.907 | 71.030 | 0.00nan0x7fffffff |
| ATOM | 1598 | O3* | A A | 75 | 1.724   | -16.642 | 66.738 | 0.00nan0x7fffffff |
| ATOM | 1599 | P   | U A | 76 | 1.691   | -17.553 | 65.411 | 0.00nan0x7fffffff |

|      |      |     |     |    |       |         |        |                   |
|------|------|-----|-----|----|-------|---------|--------|-------------------|
| ATOM | 1600 | O1P | U A | 76 | 1.531 | -16.560 | 64.317 | 0.00nan0x7fffffff |
| ATOM | 1601 | O2P | U A | 76 | 0.554 | -18.528 | 65.462 | 0.00nan0x7fffffff |
| ATOM | 1602 | O5* | U A | 76 | 3.100 | -18.300 | 65.426 | 0.00nan0x7fffffff |
| ATOM | 1603 | C5* | U A | 76 | 4.321 | -17.551 | 65.652 | 0.00nan0x7fffffff |
| ATOM | 1604 | C4* | U A | 76 | 5.397 | -18.551 | 66.000 | 0.00nan0x7fffffff |
| ATOM | 1605 | C3* | U A | 76 | 5.427 | -19.822 | 65.169 | 0.00nan0x7fffffff |
| ATOM | 1606 | O4* | U A | 76 | 5.185 | -19.015 | 67.352 | 0.00nan0x7fffffff |
| ATOM | 1607 | O2* | U A | 76 | 7.523 | -20.562 | 66.003 | 0.00nan0x7fffffff |
| ATOM | 1608 | C2* | U A | 76 | 6.127 | -20.797 | 66.113 | 0.00nan0x7fffffff |
| ATOM | 1609 | C1* | U A | 76 | 5.599 | -20.355 | 67.471 | 0.00nan0x7fffffff |
| ATOM | 1610 | N1  | U A | 76 | 4.489 | -21.256 | 67.854 | 0.00nan0x7fffffff |
| ATOM | 1611 | C6  | U A | 76 | 3.191 | -20.841 | 67.899 | 0.00nan0x7fffffff |
| ATOM | 1612 | C5  | U A | 76 | 2.186 | -21.657 | 68.251 | 0.00nan0x7fffffff |
| ATOM | 1613 | O4  | U A | 76 | 1.654 | -23.865 | 68.936 | 0.00nan0x7fffffff |
| ATOM | 1614 | C4  | U A | 76 | 2.512 | -23.002 | 68.589 | 0.00nan0x7fffffff |
| ATOM | 1615 | N3  | U A | 76 | 3.815 | -23.403 | 68.542 | 0.00nan0x7fffffff |
| ATOM | 1616 | O2  | U A | 76 | 5.994 | -22.938 | 68.145 | 0.00nan0x7fffffff |
| ATOM | 1617 | C2  | U A | 76 | 4.826 | -22.559 | 68.181 | 0.00nan0x7fffffff |
| ATOM | 1618 | O3* | U A | 76 | 6.114 | -19.674 | 63.923 | 0.00nan0x7fffffff |
| ATOM | 1619 | P   | U A | 77 | 5.598 | -20.431 | 62.599 | 0.00nan0x7fffffff |
| ATOM | 1620 | O1P | U A | 77 | 6.003 | -19.514 | 61.501 | 0.00nan0x7fffffff |
| ATOM | 1621 | O2P | U A | 77 | 4.115 | -20.637 | 62.646 | 0.00nan0x7fffffff |
| ATOM | 1622 | O5* | U A | 77 | 6.381 | -21.820 | 62.622 | 0.00nan0x7fffffff |
| ATOM | 1623 | C5* | U A | 77 | 7.813 | -21.846 | 62.851 | 0.00nan0x7fffffff |
| ATOM | 1624 | C4* | U A | 77 | 8.181 | -23.270 | 63.195 | 0.00nan0x7fffffff |
| ATOM | 1625 | C3* | U A | 77 | 7.523 | -24.354 | 62.360 | 0.00nan0x7fffffff |
| ATOM | 1626 | O4* | U A | 77 | 7.750 | -23.550 | 64.547 | 0.00nan0x7fffffff |
| ATOM | 1627 | O2* | U A | 77 | 8.889 | -26.109 | 63.191 | 0.00nan0x7fffffff |
| ATOM | 1628 | C2* | U A | 77 | 7.586 | -25.556 | 63.301 | 0.00nan0x7fffffff |
| ATOM | 1629 | C1* | U A | 77 | 7.378 | -24.903 | 64.661 | 0.00nan0x7fffffff |
| ATOM | 1630 | N1  | U A | 77 | 5.957 | -25.066 | 65.042 | 0.00nan0x7fffffff |
| ATOM | 1631 | C6  | U A | 77 | 5.086 | -24.018 | 65.088 | 0.00nan0x7fffffff |
| ATOM | 1632 | C5  | U A | 77 | 3.800 | -24.165 | 65.439 | 0.00nan0x7fffffff |
| ATOM | 1633 | O4  | U A | 77 | 2.164 | -25.741 | 66.122 | 0.00nan0x7fffffff |
| ATOM | 1634 | C4  | U A | 77 | 3.351 | -25.475 | 65.776 | 0.00nan0x7fffffff |
| ATOM | 1635 | N3  | U A | 77 | 4.234 | -26.514 | 65.728 | 0.00nan0x7fffffff |
| ATOM | 1636 | O2  | U A | 77 | 6.321 | -27.294 | 65.331 | 0.00nan0x7fffffff |
| ATOM | 1637 | C2  | U A | 77 | 5.541 | -26.346 | 65.368 | 0.00nan0x7fffffff |
| ATOM | 1638 | O3* | U A | 77 | 8.182 | -24.596 | 61.115 | 0.00nan0x7fffffff |
| ATOM | 1639 | P   | A A | 78 | 7.344 | -24.951 | 59.788 | 0.00nan0x7fffffff |
| ATOM | 1640 | O1P | A A | 78 | 8.187 | -24.405 | 58.693 | 0.00nan0x7fffffff |
| ATOM | 1641 | O2P | A A | 78 | 5.988 | -24.316 | 59.828 | 0.00nan0x7fffffff |
| ATOM | 1642 | O5* | A A | 78 | 7.242 | -26.542 | 59.813 | 0.00nan0x7fffffff |
| ATOM | 1643 | C5* | A A | 78 | 8.425 | -27.346 | 60.056 | 0.00nan0x7fffffff |
| ATOM | 1644 | C4* | A A | 78 | 7.953 | -28.739 | 60.395 | 0.00nan0x7fffffff |
| ATOM | 1645 | C3* | A A | 78 | 6.812 | -29.285 | 59.554 | 0.00nan0x7fffffff |
| ATOM | 1646 | O4* | A A | 78 | 7.432 | -28.741 | 61.744 | 0.00nan0x7fffffff |
| ATOM | 1647 | O2* | A A | 78 | 6.990 | -31.503 | 60.381 | 0.00nan0x7fffffff |
| ATOM | 1648 | C2* | A A | 78 | 6.202 | -30.326 | 60.489 | 0.00nan0x7fffffff |
| ATOM | 1649 | C1* | A A | 78 | 6.378 | -29.669 | 61.852 | 0.00nan0x7fffffff |
| ATOM | 1650 | N9  | A A | 78 | 5.101 | -29.031 | 62.232 | 0.00nan0x7fffffff |
| ATOM | 1651 | C8  | A A | 78 | 4.814 | -27.693 | 62.315 | 0.00nan0x7fffffff |
| ATOM | 1652 | N7  | A A | 78 | 3.586 | -27.438 | 62.692 | 0.00nan0x7fffffff |
| ATOM | 1653 | C5  | A A | 78 | 3.028 | -28.699 | 62.874 | 0.00nan0x7fffffff |
| ATOM | 1654 | N6  | A A | 78 | 0.751 | -28.259 | 63.574 | 0.00nan0x7fffffff |
| ATOM | 1655 | C6  | A A | 78 | 1.731 | -29.101 | 63.277 | 0.00nan0x7fffffff |
| ATOM | 1656 | N1  | A A | 78 | 1.539 | -30.452 | 63.346 | 0.00nan0x7fffffff |
| ATOM | 1657 | C2  | A A | 78 | 2.533 | -31.333 | 63.046 | 0.00nan0x7fffffff |
| ATOM | 1658 | N3  | A A | 78 | 3.769 | -31.021 | 62.662 | 0.00nan0x7fffffff |
| ATOM | 1659 | C4  | A A | 78 | 3.949 | -29.687 | 62.597 | 0.00nan0x7fffffff |
| ATOM | 1660 | O3* | A A | 78 | 7.239 | -29.847 | 58.310 | 0.00nan0x7fffffff |
| ATOM | 1661 | P   | U A | 79 | 6.350 | -29.685 | 56.978 | 0.00nan0x7fffffff |
| ATOM | 1662 | O1P | U A | 79 | 7.361 | -29.677 | 55.889 | 0.00nan0x7fffffff |
| ATOM | 1663 | O2P | U A | 79 | 5.552 | -28.418 | 57.019 | 0.00nan0x7fffffff |

|      |      |     |     |    |        |         |        |                   |
|------|------|-----|-----|----|--------|---------|--------|-------------------|
| ATOM | 1664 | O5* | U A | 79 | 5.403  | -30.969 | 56.992 | 0.00nan0x7fffffff |
| ATOM | 1665 | C5* | U A | 79 | 5.966  | -32.291 | 57.194 | 0.00nan0x7fffffff |
| ATOM | 1666 | C4* | U A | 79 | 4.822  | -33.209 | 57.554 | 0.00nan0x7fffffff |
| ATOM | 1667 | C3* | U A | 79 | 3.554  | -33.056 | 56.731 | 0.00nan0x7fffffff |
| ATOM | 1668 | O4* | U A | 79 | 4.404  | -32.925 | 58.908 | 0.00nan0x7fffffff |
| ATOM | 1669 | O2* | U A | 79 | 2.521  | -35.017 | 57.582 | 0.00nan0x7fffffff |
| ATOM | 1670 | C2* | U A | 79 | 2.494  | -33.601 | 57.685 | 0.00nan0x7fffffff |
| ATOM | 1671 | C1* | U A | 79 | 3.018  | -33.137 | 59.037 | 0.00nan0x7fffffff |
| ATOM | 1672 | N1  | U A | 79 | 2.294  | -31.904 | 59.418 | 0.00nan0x7fffffff |
| ATOM | 1673 | C6  | U A | 79 | 2.899  | -30.682 | 59.459 | 0.00nan0x7fffffff |
| ATOM | 1674 | C5  | U A | 79 | 2.243  | -29.566 | 59.810 | 0.00nan0x7fffffff |
| ATOM | 1675 | O4  | U A | 79 | 0.141  | -28.708 | 60.497 | 0.00nan0x7fffffff |
| ATOM | 1676 | C4  | U A | 79 | 0.865  | -29.686 | 60.151 | 0.00nan0x7fffffff |
| ATOM | 1677 | N3  | U A | 79 | 0.274  | -30.914 | 60.108 | 0.00nan0x7fffffff |
| ATOM | 1678 | O2  | U A | 79 | 0.406  | -33.140 | 59.716 | 0.00nan0x7fffffff |
| ATOM | 1679 | C2  | U A | 79 | 0.956  | -32.041 | 59.749 | 0.00nan0x7fffffff |
| ATOM | 1680 | O3* | U A | 79 | 3.591  | -33.763 | 55.488 | 0.00nan0x7fffffff |
| ATOM | 1681 | P   | C A | 80 | 2.913  | -33.147 | 54.164 | 0.00nan0x7fffffff |
| ATOM | 1682 | O1P | C A | 80 | 3.762  | -33.679 | 53.066 | 0.00nan0x7fffffff |
| ATOM | 1683 | O2P | C A | 80 | 2.919  | -31.649 | 54.209 | 0.00nan0x7fffffff |
| ATOM | 1684 | O5* | C A | 80 | 1.427  | -33.725 | 54.191 | 0.00nan0x7fffffff |
| ATOM | 1685 | C5* | C A | 80 | 1.198  | -35.140 | 54.411 | 0.00nan0x7fffffff |
| ATOM | 1686 | C4* | C A | 80 | -0.262 | -35.304 | 54.756 | 0.00nan0x7fffffff |
| ATOM | 1687 | C3* | C A | 80 | -1.244 | -34.498 | 53.923 | 0.00nan0x7fffffff |
| ATOM | 1688 | O4* | C A | 80 | -0.479 | -34.841 | 56.108 | 0.00nan0x7fffffff |
| ATOM | 1689 | O2* | C A | 80 | -3.173 | -35.605 | 54.753 | 0.00nan0x7fffffff |
| ATOM | 1690 | C2* | C A | 80 | -2.442 | -34.393 | 54.864 | 0.00nan0x7fffffff |
| ATOM | 1691 | C1* | C A | 80 | -1.766 | -34.281 | 56.224 | 0.00nan0x7fffffff |
| ATOM | 1692 | N1  | C A | 80 | -1.725 | -32.852 | 56.607 | 0.00nan0x7fffffff |
| ATOM | 1693 | C6  | C A | 80 | -0.564 | -32.139 | 56.653 | 0.00nan0x7fffffff |
| ATOM | 1694 | C5  | C A | 80 | -0.527 | -30.844 | 57.006 | 0.00nan0x7fffffff |
| ATOM | 1695 | N4  | C A | 80 | -1.813 | -28.938 | 57.705 | 0.00nan0x7fffffff |
| ATOM | 1696 | C4  | C A | 80 | -1.760 | -30.223 | 57.343 | 0.00nan0x7fffffff |
| ATOM | 1697 | N3  | C A | 80 | -2.915 | -30.942 | 57.298 | 0.00nan0x7fffffff |
| ATOM | 1698 | O2  | C A | 80 | -3.983 | -32.899 | 56.898 | 0.00nan0x7fffffff |
| ATOM | 1699 | C2  | C A | 80 | -2.934 | -32.259 | 56.936 | 0.00nan0x7fffffff |
| ATOM | 1700 | O3* | C A | 80 | -1.577 | -35.114 | 52.676 | 0.00nan0x7fffffff |
| ATOM | 1701 | P   | G A | 81 | -1.810 | -34.229 | 51.351 | 0.00nan0x7fffffff |
| ATOM | 1702 | O1P | G A | 81 | -1.396 | -35.141 | 50.253 | 0.00nan0x7fffffff |
| ATOM | 1703 | O2P | G A | 81 | -0.983 | -32.981 | 51.392 | 0.00nan0x7fffffff |
| ATOM | 1704 | O5* | G A | 81 | -3.369 | -33.897 | 51.382 | 0.00nan0x7fffffff |
| ATOM | 1705 | C5* | G A | 81 | -4.336 | -34.952 | 51.620 | 0.00nan0x7fffffff |
| ATOM | 1706 | C4* | G A | 81 | -5.645 | -34.283 | 51.965 | 0.00nan0x7fffffff |
| ATOM | 1707 | C3* | G A | 81 | -6.022 | -33.073 | 51.127 | 0.00nan0x7fffffff |
| ATOM | 1708 | O4* | G A | 81 | -5.568 | -33.771 | 53.315 | 0.00nan0x7fffffff |
| ATOM | 1709 | O2* | G A | 81 | -8.241 | -32.931 | 51.960 | 0.00nan0x7fffffff |
| ATOM | 1710 | C2* | G A | 81 | -6.962 | -32.322 | 52.067 | 0.00nan0x7fffffff |
| ATOM | 1711 | C1* | G A | 81 | -6.334 | -32.595 | 53.427 | 0.00nan0x7fffffff |
| ATOM | 1712 | N9  | G A | 81 | -5.517 | -31.424 | 53.808 | 0.00nan0x7fffffff |
| ATOM | 1713 | C8  | G A | 81 | -4.152 | -31.336 | 53.889 | 0.00nan0x7fffffff |
| ATOM | 1714 | N7  | G A | 81 | -3.721 | -30.159 | 54.265 | 0.00nan0x7fffffff |
| ATOM | 1715 | C5  | G A | 81 | -4.887 | -29.420 | 54.448 | 0.00nan0x7fffffff |
| ATOM | 1716 | O6  | G A | 81 | -4.234 | -27.237 | 55.140 | 0.00nan0x7fffffff |
| ATOM | 1717 | C6  | G A | 81 | -5.091 | -28.075 | 54.852 | 0.00nan0x7fffffff |
| ATOM | 1718 | N1  | G A | 81 | -6.410 | -27.700 | 54.919 | 0.00nan0x7fffffff |
| ATOM | 1719 | N2  | G A | 81 | -8.656 | -28.028 | 54.736 | 0.00nan0x7fffffff |
| ATOM | 1720 | C2  | G A | 81 | -7.428 | -28.551 | 54.621 | 0.00nan0x7fffffff |
| ATOM | 1721 | N3  | G A | 81 | -7.292 | -29.820 | 54.237 | 0.00nan0x7fffffff |
| ATOM | 1722 | C4  | G A | 81 | -5.997 | -30.188 | 54.172 | 0.00nan0x7fffffff |
| ATOM | 1723 | O3* | G A | 81 | -6.642 | -33.411 | 49.883 | 0.00nan0x7fffffff |
| ATOM | 1724 | P   | G A | 82 | -6.357 | -32.548 | 48.555 | 0.00nan0x7fffffff |
| ATOM | 1725 | O1P | G A | 82 | -6.488 | -33.547 | 47.463 | 0.00nan0x7fffffff |
| ATOM | 1726 | O2P | G A | 82 | -4.991 | -31.935 | 48.600 | 0.00nan0x7fffffff |
| ATOM | 1727 | O5* | G A | 82 | -7.497 | -31.433 | 48.572 | 0.00nan0x7fffffff |

|      |      |     |     |    |         |         |        |                   |
|------|------|-----|-----|----|---------|---------|--------|-------------------|
| ATOM | 1728 | C5* | G A | 82 | -8.878  | -31.803 | 48.817 | 0.00nan0x7fffffff |
| ATOM | 1729 | C4* | G A | 82 | -9.623  | -30.535 | 49.159 | 0.00nan0x7fffffff |
| ATOM | 1730 | C3* | G A | 82 | -9.290  | -29.313 | 48.321 | 0.00nan0x7fffffff |
| ATOM | 1731 | O4* | G A | 82 | -9.284  | -30.144 | 50.509 | 0.00nan0x7fffffff |
| ATOM | 1732 | O2* | G A | 82 | -11.085 | -28.001 | 49.152 | 0.00nan0x7fffffff |
| ATOM | 1733 | C2* | G A | 82 | -9.680  | -28.174 | 49.259 | 0.00nan0x7fffffff |
| ATOM | 1734 | C1* | G A | 82 | -9.297  | -28.740 | 50.620 | 0.00nan0x7fffffff |
| ATOM | 1735 | N9  | G A | 82 | -7.979  | -28.192 | 51.000 | 0.00nan0x7fffffff |
| ATOM | 1736 | C8  | G A | 82 | -6.781  | -28.852 | 51.083 | 0.00nan0x7fffffff |
| ATOM | 1737 | N7  | G A | 82 | -5.784  | -28.092 | 51.458 | 0.00nan0x7fffffff |
| ATOM | 1738 | C5  | G A | 82 | -6.370  | -26.841 | 51.641 | 0.00nan0x7fffffff |
| ATOM | 1739 | O6  | G A | 82 | -4.645  | -25.353 | 52.333 | 0.00nan0x7fffffff |
| ATOM | 1740 | C6  | G A | 82 | -5.819  | -25.597 | 52.044 | 0.00nan0x7fffffff |
| ATOM | 1741 | N1  | G A | 82 | -6.728  | -24.572 | 52.109 | 0.00nan0x7fffffff |
| ATOM | 1742 | N2  | G A | 82 | -8.798  | -23.640 | 51.925 | 0.00nan0x7fffffff |
| ATOM | 1743 | C2  | G A | 82 | -8.045  | -24.742 | 51.811 | 0.00nan0x7fffffff |
| ATOM | 1744 | N3  | G A | 82 | -8.613  | -25.885 | 51.428 | 0.00nan0x7fffffff |
| ATOM | 1745 | C4  | G A | 82 | -7.719  | -26.891 | 51.364 | 0.00nan0x7fffffff |
| ATOM | 1746 | O3* | G A | 82 | -9.993  | -29.266 | 47.076 | 0.00nan0x7fffffff |
| ATOM | 1747 | P   | G A | 83 | -9.289  | -28.695 | 45.747 | 0.00nan0x7fffffff |
| ATOM | 1748 | O1P | G A | 83 | -9.937  | -29.469 | 44.656 | 0.00nan0x7fffffff |
| ATOM | 1749 | O2P | G A | 83 | -7.807  | -28.913 | 45.793 | 0.00nan0x7fffffff |
| ATOM | 1750 | O5* | G A | 83 | -9.649  | -27.142 | 45.760 | 0.00nan0x7fffffff |
| ATOM | 1751 | C5* | G A | 83 | -11.015 | -26.710 | 45.989 | 0.00nan0x7fffffff |
| ATOM | 1752 | C4* | G A | 83 | -10.964 | -25.242 | 46.338 | 0.00nan0x7fffffff |
| ATOM | 1753 | C3* | G A | 83 | -10.026 | -24.386 | 45.504 | 0.00nan0x7fffffff |
| ATOM | 1754 | O4* | G A | 83 | -10.469 | -25.100 | 47.689 | 0.00nan0x7fffffff |
| ATOM | 1755 | O2* | G A | 83 | -10.836 | -22.318 | 46.343 | 0.00nan0x7fffffff |
| ATOM | 1756 | C2* | G A | 83 | -9.744  | -23.220 | 46.447 | 0.00nan0x7fffffff |
| ATOM | 1757 | C1* | G A | 83 | -9.726  | -23.909 | 47.805 | 0.00nan0x7fffffff |
| ATOM | 1758 | N9  | G A | 83 | -8.320  | -24.156 | 48.186 | 0.00nan0x7fffffff |
| ATOM | 1759 | C8  | G A | 83 | -7.666  | -25.358 | 48.268 | 0.00nan0x7fffffff |
| ATOM | 1760 | N7  | G A | 83 | -6.417  | -25.253 | 48.643 | 0.00nan0x7fffffff |
| ATOM | 1761 | C5  | G A | 83 | -6.237  | -23.884 | 48.825 | 0.00nan0x7fffffff |
| ATOM | 1762 | O6  | G A | 83 | -3.981  | -23.558 | 49.516 | 0.00nan0x7fffffff |
| ATOM | 1763 | C6  | G A | 83 | -5.102  | -23.132 | 49.228 | 0.00nan0x7fffffff |
| ATOM | 1764 | N1  | G A | 83 | -5.317  | -21.779 | 49.292 | 0.00nan0x7fffffff |
| ATOM | 1765 | N2  | G A | 83 | -6.559  | -19.879 | 49.107 | 0.00nan0x7fffffff |
| ATOM | 1766 | C2  | G A | 83 | -6.518  | -21.213 | 48.994 | 0.00nan0x7fffffff |
| ATOM | 1767 | N3  | G A | 83 | -7.612  | -21.871 | 48.612 | 0.00nan0x7fffffff |
| ATOM | 1768 | C4  | G A | 83 | -7.400  | -23.200 | 48.549 | 0.00nan0x7fffffff |
| ATOM | 1769 | O3* | G A | 83 | -10.594 | -23.963 | 44.261 | 0.00nan0x7fffffff |
| ATOM | 1770 | P   | G A | 84 | -9.693  | -23.858 | 42.931 | 0.00nan0x7fffffff |
| ATOM | 1771 | O1P | G A | 84 | -10.659 | -24.150 | 41.840 | 0.00nan0x7fffffff |
| ATOM | 1772 | O2P | G A | 84 | -8.567  | -24.845 | 42.970 | 0.00nan0x7fffffff |
| ATOM | 1773 | O5* | G A | 84 | -9.154  | -22.357 | 42.952 | 0.00nan0x7fffffff |
| ATOM | 1774 | C5* | G A | 84 | -10.066 | -21.255 | 43.191 | 0.00nan0x7fffffff |
| ATOM | 1775 | C4* | G A | 84 | -9.223  | -20.050 | 43.536 | 0.00nan0x7fffffff |
| ATOM | 1776 | C3* | G A | 84 | -7.974  | -19.843 | 42.696 | 0.00nan0x7fffffff |
| ATOM | 1777 | O4* | G A | 84 | -8.724  | -20.200 | 44.885 | 0.00nan0x7fffffff |
| ATOM | 1778 | O2* | G A | 84 | -7.524  | -17.667 | 43.534 | 0.00nan0x7fffffff |
| ATOM | 1779 | C2* | G A | 84 | -7.098  | -19.018 | 43.637 | 0.00nan0x7fffffff |
| ATOM | 1780 | C1* | G A | 84 | -7.453  | -19.605 | 44.996 | 0.00nan0x7fffffff |
| ATOM | 1781 | N9  | G A | 84 | -6.406  | -20.577 | 45.374 | 0.00nan0x7fffffff |
| ATOM | 1782 | C8  | G A | 84 | -6.511  | -21.941 | 45.455 | 0.00nan0x7fffffff |
| ATOM | 1783 | N7  | G A | 84 | -5.406  | -22.534 | 45.831 | 0.00nan0x7fffffff |
| ATOM | 1784 | C5  | G A | 84 | -4.510  | -21.482 | 46.014 | 0.00nan0x7fffffff |
| ATOM | 1785 | O6  | G A | 84 | -2.440  | -22.435 | 46.705 | 0.00nan0x7fffffff |
| ATOM | 1786 | C6  | G A | 84 | -3.150  | -21.468 | 46.418 | 0.00nan0x7fffffff |
| ATOM | 1787 | N1  | G A | 84 | -2.594  | -20.215 | 46.485 | 0.00nan0x7fffffff |
| ATOM | 1788 | N2  | G A | 84 | -2.605  | -17.945 | 46.303 | 0.00nan0x7fffffff |
| ATOM | 1789 | C2  | G A | 84 | -3.295  | -19.087 | 46.187 | 0.00nan0x7fffffff |
| ATOM | 1790 | N3  | G A | 84 | -4.571  | -19.045 | 45.805 | 0.00nan0x7fffffff |
| ATOM | 1791 | C4  | G A | 84 | -5.115  | -20.275 | 45.739 | 0.00nan0x7fffffff |

|      |      |     |     |     |        |         |         |                   |
|------|------|-----|-----|-----|--------|---------|---------|-------------------|
| ATOM | 1792 | O3* | G A | 84  | -8.226 | -19.178 | 41.455  | 0.00nan0x7fffffff |
| ATOM | 1793 | P   | U A | 85  | -7.420 | -19.577 | 40.121  | 0.00nan0x7fffffff |
| ATOM | 1794 | O1P | U A | 85  | -8.398 | -19.303 | 39.035  | 0.00nan0x7fffffff |
| ATOM | 1795 | O2P | U A | 85  | -7.006 | -21.017 | 40.158  | 0.00nan0x7fffffff |
| ATOM | 1796 | O5* | U A | 85  | -6.155 | -18.607 | 40.132  | 0.00nan0x7fffffff |
| ATOM | 1797 | C5* | U A | 85  | -6.328 | -17.180 | 40.328  | 0.00nan0x7fffffff |
| ATOM | 1798 | C4* | U A | 85  | -4.975 | -16.615 | 40.691  | 0.00nan0x7fffffff |
| ATOM | 1799 | C3* | U A | 85  | -3.799 | -17.113 | 39.868  | 0.00nan0x7fffffff |
| ATOM | 1800 | O4* | U A | 85  | -4.654 | -17.008 | 42.044  | 0.00nan0x7fffffff |
| ATOM | 1801 | O2* | U A | 85  | -2.261 | -15.520 | 40.724  | 0.00nan0x7fffffff |
| ATOM | 1802 | C2* | U A | 85  | -2.630 | -16.887 | 40.824  | 0.00nan0x7fffffff |
| ATOM | 1803 | C1* | U A | 85  | -3.264 | -17.190 | 42.175  | 0.00nan0x7fffffff |
| ATOM | 1804 | N1  | U A | 85  | -2.913 | -18.577 | 42.554  | 0.00nan0x7fffffff |
| ATOM | 1805 | C6  | U A | 85  | -3.835 | -19.581 | 42.594  | 0.00nan0x7fffffff |
| ATOM | 1806 | C5  | U A | 85  | -3.517 | -20.836 | 42.943  | 0.00nan0x7fffffff |
| ATOM | 1807 | O4  | U A | 85  | -1.738 | -22.248 | 43.630  | 0.00nan0x7fffffff |
| ATOM | 1808 | C4  | U A | 85  | -2.161 | -21.106 | 43.284  | 0.00nan0x7fffffff |
| ATOM | 1809 | N3  | U A | 85  | -1.249 | -20.092 | 43.243  | 0.00nan0x7fffffff |
| ATOM | 1810 | O2  | U A | 85  | -0.754 | -17.917 | 42.853  | 0.00nan0x7fffffff |
| ATOM | 1811 | C2  | U A | 85  | -1.589 | -18.819 | 42.885  | 0.00nan0x7fffffff |
| ATOM | 1812 | O3* | U A | 85  | -3.636 | -16.420 | 38.627  | 0.00nan0x7fffffff |
| ATOM | 1813 | P   | U A | 86  | -3.162 | -17.195 | 37.298  | 0.00nan0x7fffffff |
| ATOM | 1814 | O1P | U A | 86  | -3.812 | -16.426 | 36.204  | 0.00nan0x7fffffff |
| ATOM | 1815 | O2P | U A | 86  | -3.610 | -18.625 | 37.326  | 0.00nan0x7fffffff |
| ATOM | 1816 | O5* | U A | 86  | -1.573 | -17.081 | 37.333  | 0.00nan0x7fffffff |
| ATOM | 1817 | C5* | U A | 86  | -0.934 | -15.788 | 37.487  | 0.00nan0x7fffffff |
| ATOM | 1818 | C4* | U A | 86  | 0.506  | -16.047 | 37.860  | 0.00nan0x7fffffff |
| ATOM | 1819 | C3* | U A | 86  | 1.227  | -17.110 | 37.049  | 0.00nan0x7fffffff |
| ATOM | 1820 | O4* | U A | 86  | 0.554  | -16.543 | 39.218  | 0.00nan0x7fffffff |
| ATOM | 1821 | O2* | U A | 86  | 3.379  | -16.600 | 37.915  | 0.00nan0x7fffffff |
| ATOM | 1822 | C2* | U A | 86  | 2.326  | -17.548 | 38.014  | 0.00nan0x7fffffff |
| ATOM | 1823 | C1* | U A | 86  | 1.622  | -17.450 | 39.361  | 0.00nan0x7fffffff |
| ATOM | 1824 | N1  | U A | 86  | 1.162  | -18.803 | 39.743  | 0.00nan0x7fffffff |
| ATOM | 1825 | C6  | U A | 86  | -0.158 | -19.145 | 39.781  | 0.00nan0x7fffffff |
| ATOM | 1826 | C5  | U A | 86  | -0.575 | -20.371 | 40.131  | 0.00nan0x7fffffff |
| ATOM | 1827 | O4  | U A | 86  | 0.150  | -22.522 | 40.821  | 0.00nan0x7fffffff |
| ATOM | 1828 | C4  | U A | 86  | 0.417  | -21.334 | 40.475  | 0.00nan0x7fffffff |
| ATOM | 1829 | N3  | U A | 86  | 1.733  | -20.979 | 40.435  | 0.00nan0x7fffffff |
| ATOM | 1830 | O2  | U A | 86  | 3.331  | -19.423 | 40.045  | 0.00nan0x7fffffff |
| ATOM | 1831 | C2  | U A | 86  | 2.140  | -19.726 | 40.076  | 0.00nan0x7fffffff |
| ATOM | 1832 | O3* | U A | 86  | 1.747  | -16.628 | 35.807  | 0.00nan0x7fffffff |
| ATOM | 1833 | P   | U A | 87  | 1.725  | -17.547 | 34.485  | 0.00nan0x7fffffff |
| ATOM | 1834 | O1P | U A | 87  | 1.714  | -16.554 | 33.379  | 0.00nan0x7fffffff |
| ATOM | 1835 | O2P | U A | 87  | 0.511  | -18.424 | 34.467  | 0.00nan0x7fffffff |
| ATOM | 1836 | O5* | U A | 87  | 3.063  | -18.406 | 34.590  | 0.00nan0x7fffffff |
| ATOM | 1837 | C5* | U A | 87  | 4.357  | -17.753 | 34.518  | 0.00nan0x7fffffff |
| ATOM | 1838 | C4* | U A | 87  | 5.384  | -18.758 | 34.981  | 0.00nan0x7fffffff |
| ATOM | 1839 | C3* | U A | 87  | 5.406  | -20.086 | 34.245  | 0.00nan0x7fffffff |
| ATOM | 1840 | O4* | U A | 87  | 5.101  | -19.118 | 36.353  | 0.00nan0x7fffffff |
| ATOM | 1841 | O2* | U A | 87  | 7.443  | -20.821 | 35.219  | 0.00nan0x7fffffff |
| ATOM | 1842 | C2* | U A | 87  | 6.037  | -21.010 | 35.284  | 0.00nan0x7fffffff |
| ATOM | 1843 | C1* | U A | 87  | 5.466  | -20.458 | 36.584  | 0.00nan0x7fffffff |
| ATOM | 1844 | N1  | U A | 87  | 4.311  | -21.297 | 36.974  | 0.00nan0x7fffffff |
| ATOM | 1845 | C6  | U A | 87  | 3.034  | -20.821 | 36.997  | 0.00nan0x7fffffff |
| ATOM | 1846 | C5  | U A | 87  | 1.988  | -21.583 | 37.349  | 0.00nan0x7fffffff |
| ATOM | 1847 | O4  | U A | 87  | 1.344  | -23.753 | 38.059  | 0.00nan0x7fffffff |
| ATOM | 1848 | C4  | U A | 87  | 2.246  | -22.937 | 37.709  | 0.00nan0x7fffffff |
| ATOM | 1849 | N3  | U A | 87  | 3.528  | -23.400 | 37.681  | 0.00nan0x7fffffff |
| ATOM | 1850 | O2  | U A | 87  | 5.732  | -23.046 | 37.300  | 0.00nan0x7fffffff |
| ATOM | 1851 | C2  | U A | 87  | 4.582  | -22.611 | 37.319  | 0.00nan0x7fffffff |
| ATOM | 1852 | O3* | U A | 87  | 6.144  | -20.052 | 33.020  | 0.00nan0x7fffffff |
| ATOM | 1853 | P   | C B | 188 | 48.643 | -17.102 | 161.533 | 0.00nan0x7fffffff |
| ATOM | 1854 | O1P | C B | 188 | 48.501 | -17.056 | 160.053 | 0.00nan0x7fffffff |
| ATOM | 1855 | O2P | C B | 188 | 47.582 | -16.300 | 162.224 | 0.00nan0x7fffffff |

|      |      |     |         |        |         |         |                   |
|------|------|-----|---------|--------|---------|---------|-------------------|
| ATOM | 1856 | O5* | C B 188 | 48.753 | -18.569 | 162.141 | 0.00nan0x7fffffff |
| ATOM | 1857 | C5* | C B 188 | 49.634 | -19.542 | 161.524 | 0.00nan0x7fffffff |
| ATOM | 1858 | C4* | C B 188 | 49.668 | -20.745 | 162.435 | 0.00nan0x7fffffff |
| ATOM | 1859 | C3* | C B 188 | 48.326 | -21.369 | 162.778 | 0.00nan0x7fffffff |
| ATOM | 1860 | O4* | C B 188 | 50.213 | -20.350 | 163.715 | 0.00nan0x7fffffff |
| ATOM | 1861 | O2* | C B 188 | 49.257 | -23.311 | 163.778 | 0.00nan0x7fffffff |
| ATOM | 1862 | C2* | C B 188 | 48.637 | -22.074 | 164.097 | 0.00nan0x7fffffff |
| ATOM | 1863 | C1* | C B 188 | 49.625 | -21.112 | 164.743 | 0.00nan0x7fffffff |
| ATOM | 1864 | N1  | C B 188 | 48.891 | -20.276 | 165.718 | 0.00nan0x7fffffff |
| ATOM | 1865 | C6  | C B 188 | 48.662 | -18.947 | 165.518 | 0.00nan0x7fffffff |
| ATOM | 1866 | C5  | C B 188 | 48.001 | -18.188 | 166.406 | 0.00nan0x7fffffff |
| ATOM | 1867 | N4  | C B 188 | 46.870 | -18.141 | 168.527 | 0.00nan0x7fffffff |
| ATOM | 1868 | C4  | C B 188 | 47.537 | -18.821 | 167.591 | 0.00nan0x7fffffff |
| ATOM | 1869 | N3  | C B 188 | 47.772 | -20.148 | 167.785 | 0.00nan0x7fffffff |
| ATOM | 1870 | O2  | C B 188 | 48.653 | -22.103 | 167.056 | 0.00nan0x7fffffff |
| ATOM | 1871 | C2  | C B 188 | 48.447 | -20.905 | 166.870 | 0.00nan0x7fffffff |
| ATOM | 1872 | O3* | C B 188 | 47.840 | -22.266 | 161.776 | 0.00nan0x7fffffff |
| ATOM | 1873 | P   | C B 189 | 46.265 | -22.361 | 161.454 | 0.00nan0x7fffffff |
| ATOM | 1874 | O1P | C B 189 | 46.231 | -22.715 | 160.012 | 0.00nan0x7fffffff |
| ATOM | 1875 | O2P | C B 189 | 45.585 | -21.055 | 161.734 | 0.00nan0x7fffffff |
| ATOM | 1876 | O5* | C B 189 | 45.744 | -23.509 | 162.430 | 0.00nan0x7fffffff |
| ATOM | 1877 | C5* | C B 189 | 46.449 | -24.775 | 162.507 | 0.00nan0x7fffffff |
| ATOM | 1878 | C4* | C B 189 | 45.964 | -25.480 | 163.750 | 0.00nan0x7fffffff |
| ATOM | 1879 | C3* | C B 189 | 44.467 | -25.436 | 164.008 | 0.00nan0x7fffffff |
| ATOM | 1880 | O4* | C B 189 | 46.543 | -24.838 | 164.909 | 0.00nan0x7fffffff |
| ATOM | 1881 | O2* | C B 189 | 44.516 | -27.042 | 165.756 | 0.00nan0x7fffffff |
| ATOM | 1882 | C2* | C B 189 | 44.404 | -25.646 | 165.519 | 0.00nan0x7fffffff |
| ATOM | 1883 | C1* | C B 189 | 45.647 | -24.905 | 165.993 | 0.00nan0x7fffffff |
| ATOM | 1884 | N1  | C B 189 | 45.237 | -23.566 | 166.470 | 0.00nan0x7fffffff |
| ATOM | 1885 | C6  | C B 189 | 45.558 | -22.421 | 165.803 | 0.00nan0x7fffffff |
| ATOM | 1886 | C5  | C B 189 | 45.189 | -21.205 | 166.238 | 0.00nan0x7fffffff |
| ATOM | 1887 | N4  | C B 189 | 44.033 | -19.974 | 167.949 | 0.00nan0x7fffffff |
| ATOM | 1888 | C4  | C B 189 | 44.440 | -21.142 | 167.444 | 0.00nan0x7fffffff |
| ATOM | 1889 | N3  | C B 189 | 44.126 | -22.289 | 168.107 | 0.00nan0x7fffffff |
| ATOM | 1890 | O2  | C B 189 | 44.220 | -24.547 | 168.255 | 0.00nan0x7fffffff |
| ATOM | 1891 | C2  | C B 189 | 44.509 | -23.518 | 167.649 | 0.00nan0x7fffffff |
| ATOM | 1892 | O3* | C B 189 | 43.733 | -26.427 | 163.284 | 0.00nan0x7fffffff |
| ATOM | 1893 | P   | C B 190 | 42.270 | -26.103 | 162.694 | 0.00nan0x7fffffff |
| ATOM | 1894 | O1P | C B 190 | 42.193 | -26.957 | 161.481 | 0.00nan0x7fffffff |
| ATOM | 1895 | O2P | C B 190 | 42.137 | -24.646 | 162.370 | 0.00nan0x7fffffff |
| ATOM | 1896 | O5* | C B 190 | 41.281 | -26.531 | 163.869 | 0.00nan0x7fffffff |
| ATOM | 1897 | C5* | C B 190 | 41.419 | -27.829 | 164.502 | 0.00nan0x7fffffff |
| ATOM | 1898 | C4* | C B 190 | 40.620 | -27.785 | 165.782 | 0.00nan0x7fffffff |
| ATOM | 1899 | C3* | C B 190 | 39.249 | -27.135 | 165.697 | 0.00nan0x7fffffff |
| ATOM | 1900 | O4* | C B 190 | 41.333 | -26.985 | 166.753 | 0.00nan0x7fffffff |
| ATOM | 1901 | O2* | C B 190 | 38.553 | -27.847 | 167.853 | 0.00nan0x7fffffff |
| ATOM | 1902 | C2* | C B 190 | 39.016 | -26.706 | 167.145 | 0.00nan0x7fffffff |
| ATOM | 1903 | C1* | C B 190 | 40.419 | -26.314 | 167.588 | 0.00nan0x7fffffff |
| ATOM | 1904 | N1  | C B 190 | 40.542 | -24.843 | 167.492 | 0.00nan0x7fffffff |
| ATOM | 1905 | C6  | C B 190 | 41.334 | -24.233 | 166.564 | 0.00nan0x7fffffff |
| ATOM | 1906 | C5  | C B 190 | 41.450 | -22.898 | 166.482 | 0.00nan0x7fffffff |
| ATOM | 1907 | N4  | C B 190 | 40.765 | -20.784 | 167.398 | 0.00nan0x7fffffff |
| ATOM | 1908 | C4  | C B 190 | 40.708 | -22.119 | 167.410 | 0.00nan0x7fffffff |
| ATOM | 1909 | N3  | C B 190 | 39.922 | -22.735 | 168.335 | 0.00nan0x7fffffff |
| ATOM | 1910 | O2  | C B 190 | 39.102 | -24.640 | 169.244 | 0.00nan0x7fffffff |
| ATOM | 1911 | C2  | C B 190 | 39.815 | -24.095 | 168.404 | 0.00nan0x7fffffff |
| ATOM | 1912 | O3* | C B 190 | 38.229 | -28.012 | 165.212 | 0.00nan0x7fffffff |
| ATOM | 1913 | P   | C B 191 | 37.054 | -27.467 | 164.258 | 0.00nan0x7fffffff |
| ATOM | 1914 | O1P | C B 191 | 36.714 | -28.649 | 163.423 | 0.00nan0x7fffffff |
| ATOM | 1915 | O2P | C B 191 | 37.530 | -26.311 | 163.433 | 0.00nan0x7fffffff |
| ATOM | 1916 | O5* | C B 191 | 35.908 | -27.025 | 165.275 | 0.00nan0x7fffffff |
| ATOM | 1917 | C5* | C B 191 | 35.472 | -27.929 | 166.322 | 0.00nan0x7fffffff |
| ATOM | 1918 | C4* | C B 191 | 34.683 | -27.110 | 167.314 | 0.00nan0x7fffffff |
| ATOM | 1919 | C3* | C B 191 | 33.695 | -26.115 | 166.729 | 0.00nan0x7fffffff |

|      |      |     |         |        |         |         |                   |
|------|------|-----|---------|--------|---------|---------|-------------------|
| ATOM | 1920 | O4* | C B 191 | 35.598 | -26.293 | 168.080 | 0.00nan0x7fffffff |
| ATOM | 1921 | O2* | C B 191 | 32.646 | -25.628 | 168.803 | 0.00nan0x7fffffff |
| ATOM | 1922 | C2* | C B 191 | 33.567 | -25.098 | 167.861 | 0.00nan0x7fffffff |
| ATOM | 1923 | C1* | C B 191 | 34.981 | -25.076 | 168.426 | 0.00nan0x7fffffff |
| ATOM | 1924 | N1  | C B 191 | 35.688 | -23.905 | 167.862 | 0.00nan0x7fffffff |
| ATOM | 1925 | C6  | C B 191 | 36.708 | -24.028 | 166.965 | 0.00nan0x7fffffff |
| ATOM | 1926 | C5  | C B 191 | 37.353 | -22.965 | 166.457 | 0.00nan0x7fffffff |
| ATOM | 1927 | N4  | C B 191 | 37.523 | -20.567 | 166.437 | 0.00nan0x7fffffff |
| ATOM | 1928 | C4  | C B 191 | 36.936 | -21.678 | 166.892 | 0.00nan0x7fffffff |
| ATOM | 1929 | N3  | C B 191 | 35.918 | -21.563 | 167.789 | 0.00nan0x7fffffff |
| ATOM | 1930 | O2  | C B 191 | 34.356 | -22.541 | 169.106 | 0.00nan0x7fffffff |
| ATOM | 1931 | C2  | C B 191 | 35.273 | -22.656 | 168.296 | 0.00nan0x7fffffff |
| ATOM | 1932 | O3* | C B 191 | 32.440 | -26.699 | 166.370 | 0.00nan0x7fffffff |
| ATOM | 1933 | P   | G B 192 | 31.640 | -26.205 | 165.064 | 0.00nan0x7fffffff |
| ATOM | 1934 | O1P | G B 192 | 30.900 | -27.421 | 164.635 | 0.00nan0x7fffffff |
| ATOM | 1935 | O2P | G B 192 | 32.587 | -25.719 | 164.010 | 0.00nan0x7fffffff |
| ATOM | 1936 | O5* | G B 192 | 30.714 | -25.025 | 165.605 | 0.00nan0x7fffffff |
| ATOM | 1937 | C5* | G B 192 | 29.914 | -25.216 | 166.800 | 0.00nan0x7fffffff |
| ATOM | 1938 | C4* | G B 192 | 29.457 | -23.850 | 167.250 | 0.00nan0x7fffffff |
| ATOM | 1939 | C3* | G B 192 | 28.987 | -22.904 | 166.158 | 0.00nan0x7fffffff |
| ATOM | 1940 | O4* | G B 192 | 30.572 | -23.161 | 167.860 | 0.00nan0x7fffffff |
| ATOM | 1941 | O2* | G B 192 | 28.093 | -21.293 | 167.654 | 0.00nan0x7fffffff |
| ATOM | 1942 | C2* | G B 192 | 29.206 | -21.540 | 166.808 | 0.00nan0x7fffffff |
| ATOM | 1943 | C1* | G B 192 | 30.472 | -21.777 | 167.619 | 0.00nan0x7fffffff |
| ATOM | 1944 | N9  | G B 192 | 31.622 | -21.253 | 166.853 | 0.00nan0x7fffffff |
| ATOM | 1945 | C8  | G B 192 | 32.624 | -21.961 | 166.243 | 0.00nan0x7fffffff |
| ATOM | 1946 | N7  | G B 192 | 33.512 | -21.209 | 165.643 | 0.00nan0x7fffffff |
| ATOM | 1947 | C5  | G B 192 | 33.063 | -19.912 | 165.879 | 0.00nan0x7fffffff |
| ATOM | 1948 | O6  | G B 192 | 34.606 | -18.433 | 164.830 | 0.00nan0x7fffffff |
| ATOM | 1949 | C6  | G B 192 | 33.589 | -18.652 | 165.491 | 0.00nan0x7fffffff |
| ATOM | 1950 | N1  | G B 192 | 32.853 | -17.577 | 165.921 | 0.00nan0x7fffffff |
| ATOM | 1951 | N2  | G B 192 | 31.117 | -16.566 | 166.994 | 0.00nan0x7fffffff |
| ATOM | 1952 | C2  | G B 192 | 31.716 | -17.715 | 166.656 | 0.00nan0x7fffffff |
| ATOM | 1953 | N3  | G B 192 | 31.180 | -18.872 | 167.046 | 0.00nan0x7fffffff |
| ATOM | 1954 | C4  | G B 192 | 31.904 | -19.927 | 166.623 | 0.00nan0x7fffffff |
| ATOM | 1955 | O3* | G B 192 | 27.628 | -23.116 | 165.766 | 0.00nan0x7fffffff |
| ATOM | 1956 | P   | A B 193 | 27.174 | -22.946 | 164.231 | 0.00nan0x7fffffff |
| ATOM | 1957 | O1P | A B 193 | 26.045 | -23.903 | 164.099 | 0.00nan0x7fffffff |
| ATOM | 1958 | O2P | A B 193 | 28.303 | -23.272 | 163.302 | 0.00nan0x7fffffff |
| ATOM | 1959 | O5* | A B 193 | 26.757 | -21.410 | 164.124 | 0.00nan0x7fffffff |
| ATOM | 1960 | C5* | A B 193 | 25.869 | -20.825 | 165.111 | 0.00nan0x7fffffff |
| ATOM | 1961 | C4* | A B 193 | 25.978 | -19.325 | 164.971 | 0.00nan0x7fffffff |
| ATOM | 1962 | C3* | A B 193 | 25.995 | -18.783 | 163.551 | 0.00nan0x7fffffff |
| ATOM | 1963 | O4* | A B 193 | 27.239 | -18.893 | 165.531 | 0.00nan0x7fffffff |
| ATOM | 1964 | O2* | A B 193 | 25.743 | -16.513 | 164.198 | 0.00nan0x7fffffff |
| ATOM | 1965 | C2* | A B 193 | 26.708 | -17.446 | 163.735 | 0.00nan0x7fffffff |
| ATOM | 1966 | C1* | A B 193 | 27.722 | -17.775 | 164.823 | 0.00nan0x7fffffff |
| ATOM | 1967 | N9  | A B 193 | 29.027 | -18.034 | 164.182 | 0.00nan0x7fffffff |
| ATOM | 1968 | C8  | A B 193 | 29.695 | -19.226 | 164.070 | 0.00nan0x7fffffff |
| ATOM | 1969 | N7  | A B 193 | 30.844 | -19.133 | 163.449 | 0.00nan0x7fffffff |
| ATOM | 1970 | C5  | A B 193 | 30.939 | -17.781 | 163.132 | 0.00nan0x7fffffff |
| ATOM | 1971 | N6  | A B 193 | 33.059 | -17.577 | 161.978 | 0.00nan0x7fffffff |
| ATOM | 1972 | C6  | A B 193 | 31.944 | -17.045 | 162.459 | 0.00nan0x7fffffff |
| ATOM | 1973 | N1  | A B 193 | 31.692 | -15.708 | 162.328 | 0.00nan0x7fffffff |
| ATOM | 1974 | C2  | A B 193 | 30.554 | -15.143 | 162.814 | 0.00nan0x7fffffff |
| ATOM | 1975 | N3  | A B 193 | 29.573 | -15.777 | 163.454 | 0.00nan0x7fffffff |
| ATOM | 1976 | C4  | A B 193 | 29.830 | -17.094 | 163.579 | 0.00nan0x7fffffff |
| ATOM | 1977 | O3* | A B 193 | 24.692 | -18.638 | 162.979 | 0.00nan0x7fffffff |
| ATOM | 1978 | P   | U B 194 | 24.438 | -18.939 | 161.418 | 0.00nan0x7fffffff |
| ATOM | 1979 | O1P | U B 194 | 23.033 | -19.423 | 161.387 | 0.00nan0x7fffffff |
| ATOM | 1980 | O2P | U B 194 | 25.402 | -19.967 | 160.910 | 0.00nan0x7fffffff |
| ATOM | 1981 | O5* | U B 194 | 24.667 | -17.526 | 160.715 | 0.00nan0x7fffffff |
| ATOM | 1982 | C5* | U B 194 | 24.027 | -16.336 | 161.242 | 0.00nan0x7fffffff |
| ATOM | 1983 | C4* | U B 194 | 24.725 | -15.147 | 160.627 | 0.00nan0x7fffffff |

|      |      |     |         |        |         |         |                   |
|------|------|-----|---------|--------|---------|---------|-------------------|
| ATOM | 1984 | C3* | U B 194 | 25.040 | -15.246 | 159.144 | 0.00nan0x7fffffff |
| ATOM | 1985 | O4* | U B 194 | 26.017 | -14.987 | 161.255 | 0.00nan0x7fffffff |
| ATOM | 1986 | O2* | U B 194 | 25.661 | -12.966 | 158.916 | 0.00nan0x7fffffff |
| ATOM | 1987 | C2* | U B 194 | 26.209 | -14.273 | 159.007 | 0.00nan0x7fffffff |
| ATOM | 1988 | C1* | U B 194 | 26.942 | -14.473 | 160.326 | 0.00nan0x7fffffff |
| ATOM | 1989 | N1  | U B 194 | 28.077 | -15.394 | 160.092 | 0.00nan0x7fffffff |
| ATOM | 1990 | C6  | U B 194 | 28.108 | -16.661 | 160.594 | 0.00nan0x7fffffff |
| ATOM | 1991 | C5  | U B 194 | 29.139 | -17.493 | 160.386 | 0.00nan0x7fffffff |
| ATOM | 1992 | O4  | U B 194 | 31.261 | -17.700 | 159.346 | 0.00nan0x7fffffff |
| ATOM | 1993 | C4  | U B 194 | 30.233 | -17.011 | 159.611 | 0.00nan0x7fffffff |
| ATOM | 1994 | N3  | U B 194 | 30.190 | -15.741 | 159.117 | 0.00nan0x7fffffff |
| ATOM | 1995 | O2  | U B 194 | 29.112 | -13.764 | 158.885 | 0.00nan0x7fffffff |
| ATOM | 1996 | C2  | U B 194 | 29.133 | -14.906 | 159.339 | 0.00nan0x7fffffff |
| ATOM | 1997 | O3* | U B 194 | 23.937 | -14.904 | 158.301 | 0.00nan0x7fffffff |
| ATOM | 1998 | P   | A B 195 | 23.679 | -15.687 | 156.918 | 0.00nan0x7fffffff |
| ATOM | 1999 | O1P | A B 195 | 22.204 | -15.616 | 156.754 | 0.00nan0x7fffffff |
| ATOM | 2000 | O2P | A B 195 | 24.171 | -17.100 | 157.006 | 0.00nan0x7fffffff |
| ATOM | 2001 | O5* | A B 195 | 24.506 | -14.849 | 155.843 | 0.00nan0x7fffffff |
| ATOM | 2002 | C5* | A B 195 | 24.376 | -13.405 | 155.788 | 0.00nan0x7fffffff |
| ATOM | 2003 | C4* | A B 195 | 25.526 | -12.888 | 154.958 | 0.00nan0x7fffffff |
| ATOM | 2004 | C3* | A B 195 | 25.853 | -13.675 | 153.700 | 0.00nan0x7fffffff |
| ATOM | 2005 | O4* | A B 195 | 26.738 | -12.954 | 155.743 | 0.00nan0x7fffffff |
| ATOM | 2006 | O2* | A B 195 | 27.351 | -12.051 | 152.829 | 0.00nan0x7fffffff |
| ATOM | 2007 | C2* | A B 195 | 27.320 | -13.314 | 153.478 | 0.00nan0x7fffffff |
| ATOM | 2008 | C1* | A B 195 | 27.840 | -13.213 | 154.905 | 0.00nan0x7fffffff |
| ATOM | 2009 | N9  | A B 195 | 28.521 | -14.479 | 155.245 | 0.00nan0x7fffffff |
| ATOM | 2010 | C8  | A B 195 | 28.114 | -15.452 | 156.120 | 0.00nan0x7fffffff |
| ATOM | 2011 | N7  | A B 195 | 28.944 | -16.462 | 156.212 | 0.00nan0x7fffffff |
| ATOM | 2012 | C5  | A B 195 | 29.972 | -16.125 | 155.337 | 0.00nan0x7fffffff |
| ATOM | 2013 | N6  | A B 195 | 31.525 | -17.978 | 155.486 | 0.00nan0x7fffffff |
| ATOM | 2014 | C6  | A B 195 | 31.164 | -16.803 | 154.988 | 0.00nan0x7fffffff |
| ATOM | 2015 | N1  | A B 195 | 31.951 | -16.158 | 154.075 | 0.00nan0x7fffffff |
| ATOM | 2016 | C2  | A B 195 | 31.598 | -14.952 | 153.552 | 0.00nan0x7fffffff |
| ATOM | 2017 | N3  | A B 195 | 30.495 | -14.264 | 153.837 | 0.00nan0x7fffffff |
| ATOM | 2018 | C4  | A B 195 | 29.725 | -14.909 | 154.737 | 0.00nan0x7fffffff |
| ATOM | 2019 | O3* | A B 195 | 25.028 | -13.334 | 152.582 | 0.00nan0x7fffffff |
| ATOM | 2020 | P   | A B 196 | 24.554 | -14.457 | 151.532 | 0.00nan0x7fffffff |
| ATOM | 2021 | O1P | A B 196 | 23.237 | -13.954 | 151.062 | 0.00nan0x7fffffff |
| ATOM | 2022 | O2P | A B 196 | 24.444 | -15.796 | 152.195 | 0.00nan0x7fffffff |
| ATOM | 2023 | O5* | A B 196 | 25.699 | -14.449 | 150.421 | 0.00nan0x7fffffff |
| ATOM | 2024 | C5* | A B 196 | 26.155 | -13.195 | 149.852 | 0.00nan0x7fffffff |
| ATOM | 2025 | C4* | A B 196 | 27.466 | -13.474 | 149.157 | 0.00nan0x7fffffff |
| ATOM | 2026 | C3* | A B 196 | 27.534 | -14.753 | 148.340 | 0.00nan0x7fffffff |
| ATOM | 2027 | O4* | A B 196 | 28.500 | -13.635 | 150.155 | 0.00nan0x7fffffff |
| ATOM | 2028 | O2* | A B 196 | 29.605 | -14.223 | 147.307 | 0.00nan0x7fffffff |
| ATOM | 2029 | C2* | A B 196 | 29.035 | -15.035 | 148.323 | 0.00nan0x7fffffff |
| ATOM | 2030 | C1* | A B 196 | 29.460 | -14.563 | 149.707 | 0.00nan0x7fffffff |
| ATOM | 2031 | N9  | A B 196 | 29.559 | -15.742 | 150.592 | 0.00nan0x7fffffff |
| ATOM | 2032 | C8  | A B 196 | 28.746 | -16.085 | 151.641 | 0.00nan0x7fffffff |
| ATOM | 2033 | N7  | A B 196 | 29.097 | -17.195 | 152.242 | 0.00nan0x7fffffff |
| ATOM | 2034 | C5  | A B 196 | 30.225 | -17.608 | 151.538 | 0.00nan0x7fffffff |
| ATOM | 2035 | N6  | A B 196 | 30.899 | -19.663 | 152.630 | 0.00nan0x7fffffff |
| ATOM | 2036 | C6  | A B 196 | 31.067 | -18.735 | 151.697 | 0.00nan0x7fffffff |
| ATOM | 2037 | N1  | A B 196 | 32.098 | -18.818 | 150.805 | 0.00nan0x7fffffff |
| ATOM | 2038 | C2  | A B 196 | 32.287 | -17.876 | 149.840 | 0.00nan0x7fffffff |
| ATOM | 2039 | N3  | A B 196 | 31.535 | -16.796 | 149.638 | 0.00nan0x7fffffff |
| ATOM | 2040 | C4  | A B 196 | 30.520 | -16.724 | 150.523 | 0.00nan0x7fffffff |
| ATOM | 2041 | O3* | A B 196 | 26.985 | -14.621 | 147.026 | 0.00nan0x7fffffff |
| ATOM | 2042 | P   | U B 197 | 26.172 | -15.831 | 146.344 | 0.00nan0x7fffffff |
| ATOM | 2043 | O1P | U B 197 | 25.195 | -15.135 | 145.466 | 0.00nan0x7fffffff |
| ATOM | 2044 | O2P | U B 197 | 25.499 | -16.675 | 147.382 | 0.00nan0x7fffffff |
| ATOM | 2045 | O5* | U B 197 | 27.294 | -16.653 | 145.563 | 0.00nan0x7fffffff |
| ATOM | 2046 | C5* | U B 197 | 28.239 | -15.963 | 144.705 | 0.00nan0x7fffffff |
| ATOM | 2047 | C4* | U B 197 | 29.373 | -16.923 | 144.434 | 0.00nan0x7fffffff |



|      |      |     |         |        |         |         |                   |
|------|------|-----|---------|--------|---------|---------|-------------------|
| ATOM | 2048 | C3* | U B 197 | 28.979 | -18.359 | 144.132 | 0.00nan0x7fffffff |
| ATOM | 2049 | O4* | U B 197 | 30.196 | -17.022 | 145.618 | 0.00nan0x7fffffff |
| ATOM | 2050 | O2* | U B 197 | 31.149 | -19.022 | 143.434 | 0.00nan0x7fffffff |
| ATOM | 2051 | C2* | U B 197 | 30.244 | -19.119 | 144.524 | 0.00nan0x7fffffff |
| ATOM | 2052 | C1* | U B 197 | 30.736 | -18.318 | 145.721 | 0.00nan0x7fffffff |
| ATOM | 2053 | N1  | U B 197 | 30.302 | -19.012 | 146.954 | 0.00nan0x7fffffff |
| ATOM | 2054 | C6  | U B 197 | 29.344 | -18.506 | 147.782 | 0.00nan0x7fffffff |
| ATOM | 2055 | C5  | U B 197 | 28.955 | -19.133 | 148.902 | 0.00nan0x7fffffff |
| ATOM | 2056 | O4  | U B 197 | 29.301 | -21.059 | 150.244 | 0.00nan0x7fffffff |
| ATOM | 2057 | C4  | U B 197 | 29.581 | -20.373 | 149.218 | 0.00nan0x7fffffff |
| ATOM | 2058 | N3  | U B 197 | 30.540 | -20.867 | 148.382 | 0.00nan0x7fffffff |
| ATOM | 2059 | O2  | U B 197 | 31.790 | -20.676 | 146.505 | 0.00nan0x7fffffff |
| ATOM | 2060 | C2  | U B 197 | 30.924 | -20.215 | 147.246 | 0.00nan0x7fffffff |
| ATOM | 2061 | O3* | U B 197 | 28.608 | -18.576 | 142.768 | 0.00nan0x7fffffff |
| ATOM | 2062 | P   | C B 198 | 27.423 | -19.596 | 142.385 | 0.00nan0x7fffffff |
| ATOM | 2063 | O1P | C B 198 | 26.860 | -19.015 | 141.138 | 0.00nan0x7fffffff |
| ATOM | 2064 | O2P | C B 198 | 26.406 | -19.668 | 143.484 | 0.00nan0x7fffffff |
| ATOM | 2065 | O5* | C B 198 | 28.167 | -20.992 | 142.189 | 0.00nan0x7fffffff |
| ATOM | 2066 | C5* | C B 198 | 29.357 | -21.074 | 141.363 | 0.00nan0x7fffffff |
| ATOM | 2067 | C4* | C B 198 | 30.023 | -22.392 | 141.676 | 0.00nan0x7fffffff |
| ATOM | 2068 | C3* | C B 198 | 29.104 | -23.595 | 141.807 | 0.00nan0x7fffffff |
| ATOM | 2069 | O4* | C B 198 | 30.668 | -22.296 | 142.966 | 0.00nan0x7fffffff |
| ATOM | 2070 | O2* | C B 198 | 30.863 | -25.190 | 141.841 | 0.00nan0x7fffffff |
| ATOM | 2071 | C2* | C B 198 | 29.934 | -24.528 | 142.686 | 0.00nan0x7fffffff |
| ATOM | 2072 | C1* | C B 198 | 30.636 | -23.546 | 143.614 | 0.00nan0x7fffffff |
| ATOM | 2073 | N1  | C B 198 | 29.890 | -23.499 | 144.891 | 0.00nan0x7fffffff |
| ATOM | 2074 | C6  | C B 198 | 29.167 | -22.409 | 145.278 | 0.00nan0x7fffffff |
| ATOM | 2075 | C5  | C B 198 | 28.494 | -22.366 | 146.439 | 0.00nan0x7fffffff |
| ATOM | 2076 | N4  | C B 198 | 27.917 | -23.556 | 148.446 | 0.00nan0x7fffffff |
| ATOM | 2077 | C4  | C B 198 | 28.557 | -23.514 | 147.275 | 0.00nan0x7fffffff |
| ATOM | 2078 | N3  | C B 198 | 29.282 | -24.598 | 146.882 | 0.00nan0x7fffffff |
| ATOM | 2079 | O2  | C B 198 | 30.612 | -25.608 | 145.353 | 0.00nan0x7fffffff |
| ATOM | 2080 | C2  | C B 198 | 29.961 | -24.624 | 145.697 | 0.00nan0x7fffffff |
| ATOM | 2081 | O3* | C B 198 | 28.756 | -24.187 | 140.552 | 0.00nan0x7fffffff |
| ATOM | 2082 | P   | U B 199 | 27.286 | -24.795 | 140.305 | 0.00nan0x7fffffff |
| ATOM | 2083 | O1P | U B 199 | 27.079 | -24.605 | 138.845 | 0.00nan0x7fffffff |
| ATOM | 2084 | O2P | U B 199 | 26.263 | -24.065 | 141.120 | 0.00nan0x7fffffff |
| ATOM | 2085 | O5* | U B 199 | 27.418 | -26.316 | 140.762 | 0.00nan0x7fffffff |
| ATOM | 2086 | C5* | U B 199 | 28.517 | -27.131 | 140.279 | 0.00nan0x7fffffff |
| ATOM | 2087 | C4* | U B 199 | 28.582 | -28.355 | 141.159 | 0.00nan0x7fffffff |
| ATOM | 2088 | C3* | U B 199 | 27.254 | -29.008 | 141.503 | 0.00nan0x7fffffff |
| ATOM | 2089 | O4* | U B 199 | 29.136 | -27.981 | 142.441 | 0.00nan0x7fffffff |
| ATOM | 2090 | O2* | U B 199 | 28.224 | -30.956 | 142.451 | 0.00nan0x7fffffff |
| ATOM | 2091 | C2* | U B 199 | 27.589 | -29.736 | 142.803 | 0.00nan0x7fffffff |
| ATOM | 2092 | C1* | U B 199 | 28.570 | -28.773 | 143.459 | 0.00nan0x7fffffff |
| ATOM | 2093 | N1  | U B 199 | 27.833 | -27.968 | 144.457 | 0.00nan0x7fffffff |
| ATOM | 2094 | C6  | U B 199 | 27.583 | -26.638 | 144.286 | 0.00nan0x7fffffff |
| ATOM | 2095 | C5  | U B 199 | 26.917 | -25.908 | 145.193 | 0.00nan0x7fffffff |
| ATOM | 2096 | O4  | U B 199 | 25.829 | -25.989 | 147.300 | 0.00nan0x7fffffff |
| ATOM | 2097 | C4  | U B 199 | 26.466 | -26.568 | 146.372 | 0.00nan0x7fffffff |
| ATOM | 2098 | N3  | U B 199 | 26.724 | -27.898 | 146.531 | 0.00nan0x7fffffff |
| ATOM | 2099 | O2  | U B 199 | 27.626 | -29.825 | 145.757 | 0.00nan0x7fffffff |
| ATOM | 2100 | C2  | U B 199 | 27.403 | -28.627 | 145.597 | 0.00nan0x7fffffff |
| ATOM | 2101 | O3* | U B 199 | 26.772 | -29.891 | 140.486 | 0.00nan0x7fffffff |
| ATOM | 2102 | P   | U B 200 | 25.199 | -30.003 | 140.165 | 0.00nan0x7fffffff |
| ATOM | 2103 | O1P | U B 200 | 25.169 | -30.354 | 138.721 | 0.00nan0x7fffffff |
| ATOM | 2104 | O2P | U B 200 | 24.503 | -28.706 | 140.446 | 0.00nan0x7fffffff |
| ATOM | 2105 | O5* | U B 200 | 24.690 | -31.160 | 141.137 | 0.00nan0x7fffffff |
| ATOM | 2106 | C5* | U B 200 | 25.406 | -32.419 | 141.209 | 0.00nan0x7fffffff |
| ATOM | 2107 | C4* | U B 200 | 24.926 | -33.132 | 142.450 | 0.00nan0x7fffffff |
| ATOM | 2108 | C3* | U B 200 | 23.430 | -33.096 | 142.710 | 0.00nan0x7fffffff |
| ATOM | 2109 | O4* | U B 200 | 25.505 | -32.493 | 143.611 | 0.00nan0x7fffffff |
| ATOM | 2110 | O2* | U B 200 | 23.487 | -34.708 | 144.453 | 0.00nan0x7fffffff |
| ATOM | 2111 | C2* | U B 200 | 23.369 | -33.312 | 144.221 | 0.00nan0x7fffffff |

|      |      |     |         |        |         |         |                   |
|------|------|-----|---------|--------|---------|---------|-------------------|
| ATOM | 2112 | C1* | U B 200 | 24.610 | -32.568 | 144.696 | 0.00nan0x7fffffff |
| ATOM | 2113 | N1  | U B 200 | 24.195 | -31.231 | 145.177 | 0.00nan0x7fffffff |
| ATOM | 2114 | C6  | U B 200 | 24.508 | -30.083 | 144.512 | 0.00nan0x7fffffff |
| ATOM | 2115 | C5  | U B 200 | 24.134 | -28.872 | 144.952 | 0.00nan0x7fffffff |
| ATOM | 2116 | O4  | U B 200 | 22.976 | -27.728 | 146.678 | 0.00nan0x7fffffff |
| ATOM | 2117 | C4  | U B 200 | 23.385 | -28.809 | 146.162 | 0.00nan0x7fffffff |
| ATOM | 2118 | N3  | U B 200 | 23.079 | -29.965 | 146.817 | 0.00nan0x7fffffff |
| ATOM | 2119 | O2  | U B 200 | 23.183 | -32.222 | 146.960 | 0.00nan0x7fffffff |
| ATOM | 2120 | C2  | U B 200 | 23.468 | -31.191 | 146.355 | 0.00nan0x7fffffff |
| ATOM | 2121 | O3* | U B 200 | 22.700 | -34.088 | 141.984 | 0.00nan0x7fffffff |
| ATOM | 2122 | P   | C B 201 | 21.237 | -33.773 | 141.392 | 0.00nan0x7fffffff |
| ATOM | 2123 | O1P | C B 201 | 21.164 | -34.633 | 140.182 | 0.00nan0x7fffffff |
| ATOM | 2124 | O2P | C B 201 | 21.096 | -32.318 | 141.061 | 0.00nan0x7fffffff |
| ATOM | 2125 | O5* | C B 201 | 20.248 | -34.201 | 142.568 | 0.00nan0x7fffffff |
| ATOM | 2126 | C5* | C B 201 | 20.380 | -35.504 | 143.192 | 0.00nan0x7fffffff |
| ATOM | 2127 | C4* | C B 201 | 19.585 | -35.462 | 144.475 | 0.00nan0x7fffffff |
| ATOM | 2128 | C3* | C B 201 | 18.213 | -34.814 | 144.395 | 0.00nan0x7fffffff |
| ATOM | 2129 | O4* | C B 201 | 20.300 | -34.662 | 145.444 | 0.00nan0x7fffffff |
| ATOM | 2130 | O2* | C B 201 | 17.525 | -35.528 | 146.552 | 0.00nan0x7fffffff |
| ATOM | 2131 | C2* | C B 201 | 17.984 | -34.386 | 145.843 | 0.00nan0x7fffffff |
| ATOM | 2132 | C1* | C B 201 | 19.388 | -33.993 | 146.282 | 0.00nan0x7fffffff |
| ATOM | 2133 | N1  | C B 201 | 19.509 | -32.521 | 146.186 | 0.00nan0x7fffffff |
| ATOM | 2134 | C6  | C B 201 | 20.302 | -31.910 | 145.260 | 0.00nan0x7fffffff |
| ATOM | 2135 | C5  | C B 201 | 20.416 | -30.576 | 145.177 | 0.00nan0x7fffffff |
| ATOM | 2136 | N4  | C B 201 | 19.727 | -28.462 | 146.091 | 0.00nan0x7fffffff |
| ATOM | 2137 | C4  | C B 201 | 19.672 | -29.797 | 146.104 | 0.00nan0x7fffffff |
| ATOM | 2138 | N3  | C B 201 | 18.884 | -30.413 | 147.027 | 0.00nan0x7fffffff |
| ATOM | 2139 | O2  | C B 201 | 18.066 | -32.320 | 147.936 | 0.00nan0x7fffffff |
| ATOM | 2140 | C2  | C B 201 | 18.780 | -31.774 | 147.098 | 0.00nan0x7fffffff |
| ATOM | 2141 | O3* | C B 201 | 17.193 | -35.692 | 143.913 | 0.00nan0x7fffffff |
| ATOM | 2142 | P   | U B 202 | 16.015 | -35.148 | 142.960 | 0.00nan0x7fffffff |
| ATOM | 2143 | O1P | U B 202 | 15.669 | -36.334 | 142.132 | 0.00nan0x7fffffff |
| ATOM | 2144 | O2P | U B 202 | 16.492 | -33.998 | 142.127 | 0.00nan0x7fffffff |
| ATOM | 2145 | O5* | U B 202 | 14.875 | -34.697 | 143.978 | 0.00nan0x7fffffff |
| ATOM | 2146 | C5* | U B 202 | 14.405 | -35.612 | 145.001 | 0.00nan0x7fffffff |
| ATOM | 2147 | C4* | U B 202 | 13.627 | -34.794 | 146.003 | 0.00nan0x7fffffff |
| ATOM | 2148 | C3* | U B 202 | 12.639 | -33.792 | 145.430 | 0.00nan0x7fffffff |
| ATOM | 2149 | O4* | U B 202 | 14.551 | -33.986 | 146.766 | 0.00nan0x7fffffff |
| ATOM | 2150 | O2* | U B 202 | 11.608 | -33.310 | 147.513 | 0.00nan0x7fffffff |
| ATOM | 2151 | C2* | U B 202 | 12.525 | -32.780 | 146.567 | 0.00nan0x7fffffff |
| ATOM | 2152 | C1* | U B 202 | 13.943 | -32.767 | 147.122 | 0.00nan0x7fffffff |
| ATOM | 2153 | N1  | U B 202 | 14.652 | -31.597 | 146.560 | 0.00nan0x7fffffff |
| ATOM | 2154 | C6  | U B 202 | 15.672 | -31.720 | 145.663 | 0.00nan0x7fffffff |
| ATOM | 2155 | C5  | U B 202 | 16.319 | -30.659 | 145.158 | 0.00nan0x7fffffff |
| ATOM | 2156 | O4  | U B 202 | 16.439 | -28.290 | 145.187 | 0.00nan0x7fffffff |
| ATOM | 2157 | C4  | U B 202 | 15.908 | -29.365 | 145.591 | 0.00nan0x7fffffff |
| ATOM | 2158 | N3  | U B 202 | 14.889 | -29.257 | 146.490 | 0.00nan0x7fffffff |
| ATOM | 2159 | O2  | U B 202 | 13.325 | -30.231 | 147.806 | 0.00nan0x7fffffff |
| ATOM | 2160 | C2  | U B 202 | 14.241 | -30.348 | 146.995 | 0.00nan0x7fffffff |
| ATOM | 2161 | O3* | U B 202 | 11.378 | -34.369 | 145.078 | 0.00nan0x7fffffff |
| ATOM | 2162 | P   | U B 203 | 10.573 | -33.874 | 143.775 | 0.00nan0x7fffffff |
| ATOM | 2163 | O1P | U B 203 | 9.805  | -35.080 | 143.369 | 0.00nan0x7fffffff |
| ATOM | 2164 | O2P | U B 203 | 11.520 | -33.421 | 142.705 | 0.00nan0x7fffffff |
| ATOM | 2165 | O5* | U B 203 | 9.678  | -32.668 | 144.310 | 0.00nan0x7fffffff |
| ATOM | 2166 | C5* | U B 203 | 8.747  | -32.879 | 145.402 | 0.00nan0x7fffffff |
| ATOM | 2167 | C4* | U B 203 | 8.337  | -31.515 | 145.903 | 0.00nan0x7fffffff |
| ATOM | 2168 | C3* | U B 203 | 7.885  | -30.521 | 144.848 | 0.00nan0x7fffffff |
| ATOM | 2169 | O4* | U B 203 | 9.479  | -30.882 | 146.523 | 0.00nan0x7fffffff |
| ATOM | 2170 | O2* | U B 203 | 7.057  | -28.932 | 146.406 | 0.00nan0x7fffffff |
| ATOM | 2171 | C2* | U B 203 | 8.153  | -29.186 | 145.540 | 0.00nan0x7fffffff |
| ATOM | 2172 | C1* | U B 203 | 9.420  | -29.488 | 146.329 | 0.00nan0x7fffffff |
| ATOM | 2173 | N1  | U B 203 | 10.578 | -28.978 | 145.562 | 0.00nan0x7fffffff |
| ATOM | 2174 | C6  | U B 203 | 11.507 | -29.804 | 145.001 | 0.00nan0x7fffffff |
| ATOM | 2175 | C5  | U B 203 | 12.559 | -29.340 | 144.309 | 0.00nan0x7fffffff |

|      |      |     |         |        |         |         |                   |
|------|------|-----|---------|--------|---------|---------|-------------------|
| ATOM | 2176 | O4  | U B 203 | 13.638 | -27.371 | 143.544 | 0.00nan0x7fffffff |
| ATOM | 2177 | C4  | U B 203 | 12.691 | -27.929 | 144.171 | 0.00nan0x7fffffff |
| ATOM | 2178 | N3  | U B 203 | 11.756 | -27.114 | 144.740 | 0.00nan0x7fffffff |
| ATOM | 2179 | O2  | U B 203 | 9.859  | -26.853 | 145.947 | 0.00nan0x7fffffff |
| ATOM | 2180 | C2  | U B 203 | 10.691 | -27.602 | 145.441 | 0.00nan0x7fffffff |
| ATOM | 2181 | O3* | U B 203 | 6.516  | -30.675 | 144.464 | 0.00nan0x7fffffff |
| ATOM | 2182 | P   | C B 204 | 6.050  | -30.469 | 142.937 | 0.00nan0x7fffffff |
| ATOM | 2183 | O1P | C B 204 | 4.825  | -31.306 | 142.838 | 0.00nan0x7fffffff |
| ATOM | 2184 | O2P | C B 204 | 7.120  | -30.920 | 141.990 | 0.00nan0x7fffffff |
| ATOM | 2185 | O5* | C B 204 | 5.792  | -28.901 | 142.820 | 0.00nan0x7fffffff |
| ATOM | 2186 | C5* | C B 204 | 4.605  | -28.309 | 143.409 | 0.00nan0x7fffffff |
| ATOM | 2187 | C4* | C B 204 | 4.824  | -26.815 | 143.432 | 0.00nan0x7fffffff |
| ATOM | 2188 | C3* | C B 204 | 4.938  | -26.132 | 142.080 | 0.00nan0x7fffffff |
| ATOM | 2189 | O4* | C B 204 | 6.088  | -26.539 | 144.078 | 0.00nan0x7fffffff |
| ATOM | 2190 | O2* | C B 204 | 4.821  | -23.929 | 142.957 | 0.00nan0x7fffffff |
| ATOM | 2191 | C2* | C B 204 | 5.736  | -24.878 | 142.430 | 0.00nan0x7fffffff |
| ATOM | 2192 | C1* | C B 204 | 6.678  | -25.394 | 143.509 | 0.00nan0x7fffffff |
| ATOM | 2193 | N1  | C B 204 | 7.985  | -25.689 | 142.882 | 0.00nan0x7fffffff |
| ATOM | 2194 | C6  | C B 204 | 8.515  | -26.946 | 142.853 | 0.00nan0x7fffffff |
| ATOM | 2195 | C5  | C B 204 | 9.702  | -27.215 | 142.286 | 0.00nan0x7fffffff |
| ATOM | 2196 | N4  | C B 204 | 11.597 | -26.307 | 141.120 | 0.00nan0x7fffffff |
| ATOM | 2197 | C4  | C B 204 | 10.410 | -26.128 | 141.704 | 0.00nan0x7fffffff |
| ATOM | 2198 | N3  | C B 204 | 9.875  | -24.877 | 141.738 | 0.00nan0x7fffffff |
| ATOM | 2199 | O2  | C B 204 | 8.192  | -23.487 | 142.344 | 0.00nan0x7fffffff |
| ATOM | 2200 | C2  | C B 204 | 8.666  | -24.621 | 142.320 | 0.00nan0x7fffffff |
| ATOM | 2201 | O3* | C B 204 | 3.674  | -25.830 | 141.483 | 0.00nan0x7fffffff |
| ATOM | 2202 | P   | A B 205 | 3.471  | -25.934 | 139.890 | 0.00nan0x7fffffff |
| ATOM | 2203 | O1P | A B 205 | 2.021  | -26.225 | 139.747 | 0.00nan0x7fffffff |
| ATOM | 2204 | O2P | A B 205 | 4.326  | -27.022 | 139.314 | 0.00nan0x7fffffff |
| ATOM | 2205 | O5* | A B 205 | 3.914  | -24.500 | 139.352 | 0.00nan0x7fffffff |
| ATOM | 2206 | C5* | A B 205 | 3.274  | -23.303 | 139.863 | 0.00nan0x7fffffff |
| ATOM | 2207 | C4* | A B 205 | 4.131  | -22.131 | 139.452 | 0.00nan0x7fffffff |
| ATOM | 2208 | C3* | A B 205 | 4.366  | -21.955 | 137.962 | 0.00nan0x7fffffff |
| ATOM | 2209 | O4* | A B 205 | 5.457  | -22.304 | 140.003 | 0.00nan0x7fffffff |
| ATOM | 2210 | O2* | A B 205 | 5.339  | -19.798 | 138.160 | 0.00nan0x7fffffff |
| ATOM | 2211 | C2* | A B 205 | 5.670  | -21.161 | 137.941 | 0.00nan0x7fffffff |
| ATOM | 2212 | C1* | A B 205 | 6.415  | -21.746 | 139.133 | 0.00nan0x7fffffff |
| ATOM | 2213 | N9  | A B 205 | 7.380  | -22.748 | 138.639 | 0.00nan0x7fffffff |
| ATOM | 2214 | C8  | A B 205 | 7.251  | -24.113 | 138.620 | 0.00nan0x7fffffff |
| ATOM | 2215 | N7  | A B 205 | 8.293  | -24.736 | 138.129 | 0.00nan0x7fffffff |
| ATOM | 2216 | C5  | A B 205 | 9.173  | -23.708 | 137.809 | 0.00nan0x7fffffff |
| ATOM | 2217 | N6  | A B 205 | 11.115 | -24.833 | 136.896 | 0.00nan0x7fffffff |
| ATOM | 2218 | C6  | A B 205 | 10.471 | -23.727 | 137.244 | 0.00nan0x7fffffff |
| ATOM | 2219 | N1  | A B 205 | 11.044 | -22.499 | 137.068 | 0.00nan0x7fffffff |
| ATOM | 2220 | C2  | A B 205 | 10.400 | -21.352 | 137.417 | 0.00nan0x7fffffff |
| ATOM | 2221 | N3  | A B 205 | 9.183  | -21.265 | 137.952 | 0.00nan0x7fffffff |
| ATOM | 2222 | C4  | A B 205 | 8.626  | -22.481 | 138.120 | 0.00nan0x7fffffff |
| ATOM | 2223 | O3* | A B 205 | 3.295  | -21.274 | 137.302 | 0.00nan0x7fffffff |
| ATOM | 2224 | P   | U B 206 | 2.939  | -21.622 | 135.774 | 0.00nan0x7fffffff |
| ATOM | 2225 | O1P | U B 206 | 1.512  | -21.229 | 135.650 | 0.00nan0x7fffffff |
| ATOM | 2226 | O2P | U B 206 | 3.159  | -23.074 | 135.485 | 0.00nan0x7fffffff |
| ATOM | 2227 | O5* | U B 206 | 3.950  | -20.704 | 134.939 | 0.00nan0x7fffffff |
| ATOM | 2228 | C5* | U B 206 | 4.046  | -19.285 | 135.224 | 0.00nan0x7fffffff |
| ATOM | 2229 | C4* | U B 206 | 5.377  | -18.805 | 134.698 | 0.00nan0x7fffffff |
| ATOM | 2230 | C3* | U B 206 | 5.675  | -19.106 | 133.240 | 0.00nan0x7fffffff |
| ATOM | 2231 | O4* | U B 206 | 6.434  | -19.476 | 135.422 | 0.00nan0x7fffffff |
| ATOM | 2232 | O2* | U B 206 | 7.598  | -17.718 | 133.133 | 0.00nan0x7fffffff |
| ATOM | 2233 | C2* | U B 206 | 7.202  | -19.079 | 133.219 | 0.00nan0x7fffffff |
| ATOM | 2234 | C1* | U B 206 | 7.546  | -19.668 | 134.580 | 0.00nan0x7fffffff |
| ATOM | 2235 | N1  | U B 206 | 7.875  | -21.100 | 134.400 | 0.00nan0x7fffffff |
| ATOM | 2236 | C6  | U B 206 | 6.977  | -22.095 | 134.649 | 0.00nan0x7fffffff |
| ATOM | 2237 | C5  | U B 206 | 7.279  | -23.393 | 134.495 | 0.00nan0x7fffffff |
| ATOM | 2238 | O4  | U B 206 | 9.000  | -24.905 | 133.879 | 0.00nan0x7fffffff |
| ATOM | 2239 | C4  | U B 206 | 8.595  | -23.719 | 134.060 | 0.00nan0x7fffffff |

|      |      |     |         |        |         |         |                   |
|------|------|-----|---------|--------|---------|---------|-------------------|
| ATOM | 2240 | N3  | U B 206 | 9.485  | -22.714 | 133.820 | 0.00nan0x7fffffff |
| ATOM | 2241 | O2  | U B 206 | 9.978  | -20.505 | 133.761 | 0.00nan0x7fffffff |
| ATOM | 2242 | C2  | U B 206 | 9.162  | -21.397 | 133.982 | 0.00nan0x7fffffff |
| ATOM | 2243 | O3* | U B 206 | 5.095  | -18.158 | 132.339 | 0.00nan0x7fffffff |
| ATOM | 2244 | P   | A B 207 | 4.573  | -18.621 | 130.890 | 0.00nan0x7fffffff |
| ATOM | 2245 | O1P | A B 207 | 3.410  | -17.732 | 130.641 | 0.00nan0x7fffffff |
| ATOM | 2246 | O2P | A B 207 | 4.193  | -20.069 | 130.893 | 0.00nan0x7fffffff |
| ATOM | 2247 | O5* | A B 207 | 5.827  | -18.351 | 129.936 | 0.00nan0x7fffffff |
| ATOM | 2248 | C5* | A B 207 | 6.563  | -17.105 | 130.034 | 0.00nan0x7fffffff |
| ATOM | 2249 | C4* | A B 207 | 7.918  | -17.332 | 129.406 | 0.00nan0x7fffffff |
| ATOM | 2250 | C3* | A B 207 | 7.939  | -18.176 | 128.143 | 0.00nan0x7fffffff |
| ATOM | 2251 | O4* | A B 207 | 8.746  | -18.066 | 130.337 | 0.00nan0x7fffffff |
| ATOM | 2252 | O2* | A B 207 | 10.202 | -17.693 | 127.613 | 0.00nan0x7fffffff |
| ATOM | 2253 | C2* | A B 207 | 9.368  | -18.711 | 128.147 | 0.00nan0x7fffffff |
| ATOM | 2254 | C1* | A B 207 | 9.627  | -18.911 | 129.634 | 0.00nan0x7fffffff |
| ATOM | 2255 | N9  | A B 207 | 9.415  | -20.337 | 129.956 | 0.00nan0x7fffffff |
| ATOM | 2256 | C8  | A B 207 | 8.428  | -20.894 | 130.727 | 0.00nan0x7fffffff |
| ATOM | 2257 | N7  | A B 207 | 8.511  | -22.197 | 130.831 | 0.00nan0x7fffffff |
| ATOM | 2258 | C5  | A B 207 | 9.634  | -22.519 | 130.076 | 0.00nan0x7fffffff |
| ATOM | 2259 | N6  | A B 207 | 9.811  | -24.929 | 130.249 | 0.00nan0x7fffffff |
| ATOM | 2260 | C6  | A B 207 | 10.249 | -23.763 | 129.794 | 0.00nan0x7fffffff |
| ATOM | 2261 | N1  | A B 207 | 11.360 | -23.692 | 129.001 | 0.00nan0x7fffffff |
| ATOM | 2262 | C2  | A B 207 | 11.825 | -22.506 | 128.524 | 0.00nan0x7fffffff |
| ATOM | 2263 | N3  | A B 207 | 11.294 | -21.306 | 128.750 | 0.00nan0x7fffffff |
| ATOM | 2264 | C4  | A B 207 | 10.200 | -21.385 | 129.534 | 0.00nan0x7fffffff |
| ATOM | 2265 | O3* | A B 207 | 7.631  | -17.435 | 126.958 | 0.00nan0x7fffffff |
| ATOM | 2266 | P   | C B 208 | 6.794  | -18.110 | 125.761 | 0.00nan0x7fffffff |
| ATOM | 2267 | O1P | C B 208 | 6.162  | -16.948 | 125.086 | 0.00nan0x7fffffff |
| ATOM | 2268 | O2P | C B 208 | 5.781  | -19.076 | 126.296 | 0.00nan0x7fffffff |
| ATOM | 2269 | O5* | C B 208 | 7.906  | -18.855 | 124.893 | 0.00nan0x7fffffff |
| ATOM | 2270 | C5* | C B 208 | 9.251  | -18.315 | 124.819 | 0.00nan0x7fffffff |
| ATOM | 2271 | C4* | C B 208 | 10.140 | -19.407 | 124.274 | 0.00nan0x7fffffff |
| ATOM | 2272 | C3* | C B 208 | 9.547  | -20.270 | 123.174 | 0.00nan0x7fffffff |
| ATOM | 2273 | O4* | C B 208 | 10.439 | -20.341 | 125.336 | 0.00nan0x7fffffff |
| ATOM | 2274 | O2* | C B 208 | 11.598 | -21.333 | 122.625 | 0.00nan0x7fffffff |
| ATOM | 2275 | C2* | C B 208 | 10.369 | -21.550 | 123.303 | 0.00nan0x7fffffff |
| ATOM | 2276 | C1* | C B 208 | 10.580 | -21.639 | 124.809 | 0.00nan0x7fffffff |
| ATOM | 2277 | N1  | C B 208 | 9.586  | -22.584 | 125.362 | 0.00nan0x7fffffff |
| ATOM | 2278 | C6  | C B 208 | 8.592  | -22.191 | 126.209 | 0.00nan0x7fffffff |
| ATOM | 2279 | C5  | C B 208 | 7.692  | -23.050 | 126.713 | 0.00nan0x7fffffff |
| ATOM | 2280 | N4  | C B 208 | 6.955  | -25.337 | 126.789 | 0.00nan0x7fffffff |
| ATOM | 2281 | C4  | C B 208 | 7.807  | -24.415 | 126.334 | 0.00nan0x7fffffff |
| ATOM | 2282 | N3  | C B 208 | 8.804  | -24.801 | 125.490 | 0.00nan0x7fffffff |
| ATOM | 2283 | O2  | C B 208 | 10.606 | -24.272 | 124.225 | 0.00nan0x7fffffff |
| ATOM | 2284 | C2  | C B 208 | 9.711  | -23.912 | 124.986 | 0.00nan0x7fffffff |
| ATOM | 2285 | O3* | C B 208 | 9.642  | -19.684 | 121.872 | 0.00nan0x7fffffff |
| ATOM | 2286 | P   | U B 209 | 8.456  | -19.851 | 120.797 | 0.00nan0x7fffffff |
| ATOM | 2287 | O1P | U B 209 | 8.418  | -18.527 | 120.122 | 0.00nan0x7fffffff |
| ATOM | 2288 | O2P | U B 209 | 7.161  | -20.173 | 121.479 | 0.00nan0x7fffffff |
| ATOM | 2289 | O5* | U B 209 | 8.941  | -21.052 | 119.870 | 0.00nan0x7fffffff |
| ATOM | 2290 | C5* | U B 209 | 10.299 | -21.079 | 119.359 | 0.00nan0x7fffffff |
| ATOM | 2291 | C4* | U B 209 | 10.531 | -22.464 | 118.803 | 0.00nan0x7fffffff |
| ATOM | 2292 | C3* | U B 209 | 9.358  | -23.097 | 118.072 | 0.00nan0x7fffffff |
| ATOM | 2293 | O4* | U B 209 | 10.800 | -23.369 | 119.898 | 0.00nan0x7fffffff |
| ATOM | 2294 | O2* | U B 209 | 10.632 | -24.902 | 117.201 | 0.00nan0x7fffffff |
| ATOM | 2295 | C2* | U B 209 | 9.679  | -24.582 | 118.205 | 0.00nan0x7fffffff |
| ATOM | 2296 | C1* | U B 209 | 10.304 | -24.651 | 119.591 | 0.00nan0x7fffffff |
| ATOM | 2297 | N1  | U B 209 | 9.273  | -25.100 | 120.552 | 0.00nan0x7fffffff |
| ATOM | 2298 | C6  | U B 209 | 8.499  | -24.227 | 121.259 | 0.00nan0x7fffffff |
| ATOM | 2299 | C5  | U B 209 | 7.577  | -24.636 | 122.144 | 0.00nan0x7fffffff |
| ATOM | 2300 | O4  | U B 209 | 6.595  | -26.546 | 123.150 | 0.00nan0x7fffffff |
| ATOM | 2301 | C4  | U B 209 | 7.427  | -26.038 | 122.344 | 0.00nan0x7fffffff |
| ATOM | 2302 | N3  | U B 209 | 8.214  | -26.899 | 121.638 | 0.00nan0x7fffffff |
| ATOM | 2303 | O2  | U B 209 | 9.848  | -27.258 | 120.113 | 0.00nan0x7fffffff |

|      |      |     |     |     |        |         |         |                   |
|------|------|-----|-----|-----|--------|---------|---------|-------------------|
| ATOM | 2304 | C2  | U B | 209 | 9.148  | -26.467 | 120.740 | 0.00nan0x7fffffff |
| ATOM | 2305 | O3* | U B | 209 | 9.264  | -22.625 | 116.730 | 0.00nan0x7fffffff |
| ATOM | 2306 | P   | U B | 210 | 8.631  | -23.388 | 115.500 | 0.00nan0x7fffffff |
| ATOM | 2307 | O1P | U B | 210 | 7.518  | -24.184 | 116.093 | 0.00nan0x7fffffff |
| ATOM | 2308 | O2P | U B | 210 | 9.633  | -24.278 | 114.817 | 0.00nan0x7fffffff |
| ATOM | 2309 | O5* | U B | 210 | 8.138  | -22.235 | 114.510 | 0.00nan0x7fffffff |
| ATOM | 2310 | C5* | U B | 210 | 8.849  | -20.971 | 114.450 | 0.00nan0x7fffffff |
| ATOM | 2311 | C4* | U B | 210 | 7.929  | -19.982 | 113.772 | 0.00nan0x7fffffff |
| ATOM | 2312 | C3* | U B | 210 | 6.535  | -19.857 | 114.367 | 0.00nan0x7fffffff |
| ATOM | 2313 | O4* | U B | 210 | 7.700  | -20.417 | 112.413 | 0.00nan0x7fffffff |
| ATOM | 2314 | O2* | U B | 210 | 5.936  | -17.944 | 113.095 | 0.00nan0x7fffffff |
| ATOM | 2315 | C2* | U B | 210 | 5.731  | -19.347 | 113.173 | 0.00nan0x7fffffff |
| ATOM | 2316 | C1* | U B | 210 | 6.396  | -20.066 | 112.008 | 0.00nan0x7fffffff |
| ATOM | 2317 | N1  | U B | 210 | 5.587  | -21.251 | 111.647 | 0.00nan0x7fffffff |
| ATOM | 2318 | C6  | U B | 210 | 6.126  | -22.501 | 111.553 | 0.00nan0x7fffffff |
| ATOM | 2319 | C5  | U B | 210 | 5.401  | -23.574 | 111.205 | 0.00nan0x7fffffff |
| ATOM | 2320 | O4  | U B | 210 | 3.234  | -24.307 | 110.576 | 0.00nan0x7fffffff |
| ATOM | 2321 | C4  | U B | 210 | 4.021  | -23.375 | 110.915 | 0.00nan0x7fffffff |
| ATOM | 2322 | N3  | U B | 210 | 3.497  | -22.118 | 111.000 | 0.00nan0x7fffffff |
| ATOM | 2323 | O2  | U B | 210 | 3.762  | -19.910 | 111.426 | 0.00nan0x7fffffff |
| ATOM | 2324 | C2  | U B | 210 | 4.251  | -21.035 | 111.350 | 0.00nan0x7fffffff |
| ATOM | 2325 | O3* | U B | 210 | 6.472  | -18.972 | 115.489 | 0.00nan0x7fffffff |
| ATOM | 2326 | P   | U B | 211 | 5.555  | -19.292 | 116.772 | 0.00nan0x7fffffff |
| ATOM | 2327 | O1P | U B | 211 | 6.153  | -18.441 | 117.836 | 0.00nan0x7fffffff |
| ATOM | 2328 | O2P | U B | 211 | 5.620  | -20.750 | 117.120 | 0.00nan0x7fffffff |
| ATOM | 2329 | O5* | U B | 211 | 4.092  | -18.864 | 116.326 | 0.00nan0x7fffffff |
| ATOM | 2330 | C5* | U B | 211 | 3.661  | -17.482 | 116.444 | 0.00nan0x7fffffff |
| ATOM | 2331 | C4* | U B | 211 | 2.265  | -17.421 | 115.870 | 0.00nan0x7fffffff |
| ATOM | 2332 | C3* | U B | 211 | 1.234  | -18.317 | 116.539 | 0.00nan0x7fffffff |
| ATOM | 2333 | O4* | U B | 211 | 2.307  | -17.884 | 114.502 | 0.00nan0x7fffffff |
| ATOM | 2334 | O2* | U B | 211 | -0.626 | -17.373 | 115.404 | 0.00nan0x7fffffff |
| ATOM | 2335 | C2* | U B | 211 | 0.218  | -18.515 | 115.415 | 0.00nan0x7fffffff |
| ATOM | 2336 | C1* | U B | 211 | 1.110  | -18.553 | 114.182 | 0.00nan0x7fffffff |
| ATOM | 2337 | N1  | U B | 211 | 1.341  | -19.967 | 113.814 | 0.00nan0x7fffffff |
| ATOM | 2338 | C6  | U B | 211 | 2.509  | -20.614 | 114.091 | 0.00nan0x7fffffff |
| ATOM | 2339 | C5  | U B | 211 | 2.721  | -21.895 | 113.752 | 0.00nan0x7fffffff |
| ATOM | 2340 | O4  | U B | 211 | 1.754  | -23.788 | 112.699 | 0.00nan0x7fffffff |
| ATOM | 2341 | C4  | U B | 211 | 1.676  | -22.581 | 113.069 | 0.00nan0x7fffffff |
| ATOM | 2342 | N3  | U B | 211 | 0.514  | -21.920 | 112.796 | 0.00nan0x7fffffff |
| ATOM | 2343 | O2  | U B | 211 | -0.738 | -20.036 | 112.889 | 0.00nan0x7fffffff |
| ATOM | 2344 | C2  | U B | 211 | 0.315  | -20.616 | 113.146 | 0.00nan0x7fffffff |
| ATOM | 2345 | O3* | U B | 211 | 0.648  | -17.745 | 117.712 | 0.00nan0x7fffffff |
| ATOM | 2346 | P   | G B | 212 | 0.374  | -18.598 | 119.050 | 0.00nan0x7fffffff |
| ATOM | 2347 | O1P | G B | 212 | 0.553  | -17.594 | 120.134 | 0.00nan0x7fffffff |
| ATOM | 2348 | O2P | G B | 212 | 1.353  | -19.728 | 119.167 | 0.00nan0x7fffffff |
| ATOM | 2349 | O5* | G B | 212 | -1.114 | -19.131 | 118.883 | 0.00nan0x7fffffff |
| ATOM | 2350 | C5* | G B | 212 | -2.171 | -18.706 | 119.781 | 0.00nan0x7fffffff |
| ATOM | 2351 | C4* | G B | 212 | -3.317 | -19.675 | 119.611 | 0.00nan0x7fffffff |
| ATOM | 2352 | C3* | G B | 212 | -3.138 | -21.039 | 120.254 | 0.00nan0x7fffffff |
| ATOM | 2353 | O4* | G B | 212 | -3.476 | -19.965 | 118.203 | 0.00nan0x7fffffff |
| ATOM | 2354 | O2* | G B | 212 | -5.387 | -21.715 | 119.910 | 0.00nan0x7fffffff |
| ATOM | 2355 | C2* | G B | 212 | -4.071 | -21.908 | 119.414 | 0.00nan0x7fffffff |
| ATOM | 2356 | C1* | G B | 212 | -3.908 | -21.294 | 118.030 | 0.00nan0x7fffffff |
| ATOM | 2357 | N9  | G B | 212 | -2.906 | -22.101 | 117.299 | 0.00nan0x7fffffff |
| ATOM | 2358 | C8  | G B | 212 | -1.566 | -21.853 | 117.163 | 0.00nan0x7fffffff |
| ATOM | 2359 | N7  | G B | 212 | -0.928 | -22.766 | 116.474 | 0.00nan0x7fffffff |
| ATOM | 2360 | C5  | G B | 212 | -1.920 | -23.687 | 116.146 | 0.00nan0x7fffffff |
| ATOM | 2361 | O6  | G B | 212 | -0.878 | -25.418 | 114.886 | 0.00nan0x7fffffff |
| ATOM | 2362 | C6  | G B | 212 | -1.865 | -24.904 | 115.418 | 0.00nan0x7fffffff |
| ATOM | 2363 | N1  | G B | 212 | -3.074 | -25.542 | 115.293 | 0.00nan0x7fffffff |
| ATOM | 2364 | N2  | G B | 212 | -5.310 | -25.801 | 115.634 | 0.00nan0x7fffffff |
| ATOM | 2365 | C2  | G B | 212 | -4.220 | -25.052 | 115.840 | 0.00nan0x7fffffff |
| ATOM | 2366 | N3  | G B | 212 | -4.325 | -23.922 | 116.539 | 0.00nan0x7fffffff |
| ATOM | 2367 | C4  | G B | 212 | -3.139 | -23.292 | 116.652 | 0.00nan0x7fffffff |

|      |      |     |         |        |         |         |                   |
|------|------|-----|---------|--------|---------|---------|-------------------|
| ATOM | 2368 | O3* | G B 212 | -3.464 | -21.070 | 121.646 | 0.00nan0x7fffffff |
| ATOM | 2369 | P   | G B 213 | -2.616 | -21.993 | 122.659 | 0.00nan0x7fffffff |
| ATOM | 2370 | O1P | G B 213 | -3.063 | -21.527 | 123.998 | 0.00nan0x7fffffff |
| ATOM | 2371 | O2P | G B 213 | -1.145 | -21.789 | 122.455 | 0.00nan0x7fffffff |
| ATOM | 2372 | O5* | G B 213 | -3.055 | -23.479 | 122.295 | 0.00nan0x7fffffff |
| ATOM | 2373 | C5* | G B 213 | -4.117 | -24.113 | 123.053 | 0.00nan0x7fffffff |
| ATOM | 2374 | C4* | G B 213 | -4.324 | -25.487 | 122.471 | 0.00nan0x7fffffff |
| ATOM | 2375 | C3* | G B 213 | -3.285 | -26.539 | 122.817 | 0.00nan0x7fffffff |
| ATOM | 2376 | O4* | G B 213 | -4.282 | -25.410 | 121.028 | 0.00nan0x7fffffff |
| ATOM | 2377 | O2* | G B 213 | -4.557 | -28.360 | 121.979 | 0.00nan0x7fffffff |
| ATOM | 2378 | C2* | G B 213 | -3.447 | -27.530 | 121.668 | 0.00nan0x7fffffff |
| ATOM | 2379 | C1* | G B 213 | -3.762 | -26.606 | 120.498 | 0.00nan0x7fffffff |
| ATOM | 2380 | N9  | G B 213 | -2.519 | -26.396 | 119.727 | 0.00nan0x7fffffff |
| ATOM | 2381 | C8  | G B 213 | -1.741 | -25.269 | 119.665 | 0.00nan0x7fffffff |
| ATOM | 2382 | N7  | G B 213 | -0.696 | -25.392 | 118.888 | 0.00nan0x7fffffff |
| ATOM | 2383 | C5  | G B 213 | -0.792 | -26.694 | 118.403 | 0.00nan0x7fffffff |
| ATOM | 2384 | O6  | G B 213 | 1.069  | -27.048 | 116.961 | 0.00nan0x7fffffff |
| ATOM | 2385 | C6  | G B 213 | 0.036  | -27.430 | 117.516 | 0.00nan0x7fffffff |
| ATOM | 2386 | N1  | G B 213 | -0.394 | -28.709 | 117.271 | 0.00nan0x7fffffff |
| ATOM | 2387 | N2  | G B 213 | -1.800 | -30.487 | 117.493 | 0.00nan0x7fffffff |
| ATOM | 2388 | C2  | G B 213 | -1.521 | -29.223 | 117.836 | 0.00nan0x7fffffff |
| ATOM | 2389 | N3  | G B 213 | -2.332 | -28.577 | 118.673 | 0.00nan0x7fffffff |
| ATOM | 2390 | C4  | G B 213 | -1.909 | -27.320 | 118.912 | 0.00nan0x7fffffff |
| ATOM | 2391 | O3* | G B 213 | -3.490 | -27.143 | 124.097 | 0.00nan0x7fffffff |
| ATOM | 2392 | P   | C B 214 | -2.231 | -27.597 | 124.991 | 0.00nan0x7fffffff |
| ATOM | 2393 | O1P | C B 214 | -2.754 | -27.533 | 126.380 | 0.00nan0x7fffffff |
| ATOM | 2394 | O2P | C B 214 | -1.067 | -26.678 | 124.781 | 0.00nan0x7fffffff |
| ATOM | 2395 | O5* | C B 214 | -1.908 | -29.072 | 124.475 | 0.00nan0x7fffffff |
| ATOM | 2396 | C5* | C B 214 | -2.789 | -30.171 | 124.820 | 0.00nan0x7fffffff |
| ATOM | 2397 | C4* | C B 214 | -2.457 | -31.317 | 123.896 | 0.00nan0x7fffffff |
| ATOM | 2398 | C3* | C B 214 | -1.107 | -31.982 | 124.100 | 0.00nan0x7fffffff |
| ATOM | 2399 | O4* | C B 214 | -2.410 | -30.828 | 122.536 | 0.00nan0x7fffffff |
| ATOM | 2400 | O2* | C B 214 | -1.569 | -33.821 | 122.671 | 0.00nan0x7fffffff |
| ATOM | 2401 | C2* | C B 214 | -0.850 | -32.597 | 122.726 | 0.00nan0x7fffffff |
| ATOM | 2402 | C1* | C B 214 | -1.460 | -31.558 | 121.796 | 0.00nan0x7fffffff |
| ATOM | 2403 | N1  | C B 214 | -0.371 | -30.703 | 121.273 | 0.00nan0x7fffffff |
| ATOM | 2404 | C6  | C B 214 | -0.319 | -29.360 | 121.504 | 0.00nan0x7fffffff |
| ATOM | 2405 | C5  | C B 214 | 0.667  | -28.584 | 121.025 | 0.00nan0x7fffffff |
| ATOM | 2406 | N4  | C B 214 | 2.694  | -28.518 | 119.735 | 0.00nan0x7fffffff |
| ATOM | 2407 | C4  | C B 214 | 1.678  | -29.215 | 120.250 | 0.00nan0x7fffffff |
| ATOM | 2408 | N3  | C B 214 | 1.617  | -30.555 | 120.021 | 0.00nan0x7fffffff |
| ATOM | 2409 | O2  | C B 214 | 0.562  | -32.539 | 120.304 | 0.00nan0x7fffffff |
| ATOM | 2410 | C2  | C B 214 | 0.606  | -31.330 | 120.516 | 0.00nan0x7fffffff |
| ATOM | 2411 | O3* | C B 214 | -1.103 | -32.957 | 125.147 | 0.00nan0x7fffffff |
| ATOM | 2412 | P   | G B 215 | 0.190  | -33.149 | 126.085 | 0.00nan0x7fffffff |
| ATOM | 2413 | O1P | G B 215 | -0.371 | -33.755 | 127.322 | 0.00nan0x7fffffff |
| ATOM | 2414 | O2P | G B 215 | 0.856  | -31.834 | 126.353 | 0.00nan0x7fffffff |
| ATOM | 2415 | O5* | G B 215 | 1.134  | -34.120 | 125.244 | 0.00nan0x7fffffff |
| ATOM | 2416 | C5* | G B 215 | 0.552  | -35.113 | 124.362 | 0.00nan0x7fffffff |
| ATOM | 2417 | C4* | G B 215 | 1.668  | -35.639 | 123.492 | 0.00nan0x7fffffff |
| ATOM | 2418 | C3* | G B 215 | 3.061  | -35.615 | 124.098 | 0.00nan0x7fffffff |
| ATOM | 2419 | O4* | G B 215 | 1.778  | -34.807 | 122.315 | 0.00nan0x7fffffff |
| ATOM | 2420 | O2* | G B 215 | 4.058  | -36.927 | 122.389 | 0.00nan0x7fffffff |
| ATOM | 2421 | C2* | G B 215 | 3.945  | -35.590 | 122.854 | 0.00nan0x7fffffff |
| ATOM | 2422 | C1* | G B 215 | 3.121  | -34.742 | 121.896 | 0.00nan0x7fffffff |
| ATOM | 2423 | N9  | G B 215 | 3.650  | -33.363 | 121.905 | 0.00nan0x7fffffff |
| ATOM | 2424 | C8  | G B 215 | 3.106  | -32.252 | 122.496 | 0.00nan0x7fffffff |
| ATOM | 2425 | N7  | G B 215 | 3.800  | -31.159 | 122.304 | 0.00nan0x7fffffff |
| ATOM | 2426 | C5  | G B 215 | 4.872  | -31.579 | 121.520 | 0.00nan0x7fffffff |
| ATOM | 2427 | O6  | G B 215 | 6.225  | -29.665 | 121.095 | 0.00nan0x7fffffff |
| ATOM | 2428 | C6  | G B 215 | 5.974  | -30.867 | 120.977 | 0.00nan0x7fffffff |
| ATOM | 2429 | N1  | G B 215 | 6.839  | -31.639 | 120.245 | 0.00nan0x7fffffff |
| ATOM | 2430 | N2  | G B 215 | 7.586  | -33.579 | 119.316 | 0.00nan0x7fffffff |
| ATOM | 2431 | C2  | G B 215 | 6.649  | -32.973 | 120.057 | 0.00nan0x7fffffff |

|      |      |     |         |        |         |         |                   |
|------|------|-----|---------|--------|---------|---------|-------------------|
| ATOM | 2432 | N3  | G B 215 | 5.635  | -33.688 | 120.542 | 0.00nan0x7fffffff |
| ATOM | 2433 | C4  | G B 215 | 4.786  | -32.929 | 121.262 | 0.00nan0x7fffffff |
| ATOM | 2434 | O3* | G B 215 | 3.329  | -36.740 | 124.940 | 0.00nan0x7fffffff |
| ATOM | 2435 | P   | A B 216 | 4.234  | -36.595 | 126.260 | 0.00nan0x7fffffff |
| ATOM | 2436 | O1P | A B 216 | 3.873  | -37.794 | 127.060 | 0.00nan0x7fffffff |
| ATOM | 2437 | O2P | A B 216 | 3.930  | -35.319 | 126.982 | 0.00nan0x7fffffff |
| ATOM | 2438 | O5* | A B 216 | 5.728  | -36.604 | 125.698 | 0.00nan0x7fffffff |
| ATOM | 2439 | C5* | A B 216 | 6.150  | -37.597 | 124.728 | 0.00nan0x7fffffff |
| ATOM | 2440 | C4* | A B 216 | 7.381  | -37.052 | 124.040 | 0.00nan0x7fffffff |
| ATOM | 2441 | C3* | A B 216 | 8.403  | -36.383 | 124.938 | 0.00nan0x7fffffff |
| ATOM | 2442 | O4* | A B 216 | 6.972  | -36.010 | 123.124 | 0.00nan0x7fffffff |
| ATOM | 2443 | O2* | A B 216 | 10.074 | -36.207 | 123.260 | 0.00nan0x7fffffff |
| ATOM | 2444 | C2* | A B 216 | 9.109  | -35.441 | 123.966 | 0.00nan0x7fffffff |
| ATOM | 2445 | C1* | A B 216 | 7.969  | -35.017 | 123.051 | 0.00nan0x7fffffff |
| ATOM | 2446 | N9  | A B 216 | 7.469  | -33.697 | 123.490 | 0.00nan0x7fffffff |
| ATOM | 2447 | C8  | A B 216 | 6.414  | -33.428 | 124.322 | 0.00nan0x7fffffff |
| ATOM | 2448 | N7  | A B 216 | 6.189  | -32.149 | 124.495 | 0.00nan0x7fffffff |
| ATOM | 2449 | C5  | A B 216 | 7.155  | -31.535 | 123.704 | 0.00nan0x7fffffff |
| ATOM | 2450 | N6  | A B 216 | 6.765  | -29.163 | 124.004 | 0.00nan0x7fffffff |
| ATOM | 2451 | C6  | A B 216 | 7.424  | -30.169 | 123.447 | 0.00nan0x7fffffff |
| ATOM | 2452 | N1  | A B 216 | 8.483  | -29.935 | 122.614 | 0.00nan0x7fffffff |
| ATOM | 2453 | C2  | A B 216 | 9.188  | -30.954 | 122.050 | 0.00nan0x7fffffff |
| ATOM | 2454 | N3  | A B 216 | 8.974  | -32.255 | 122.235 | 0.00nan0x7fffffff |
| ATOM | 2455 | C4  | A B 216 | 7.942  | -32.475 | 123.073 | 0.00nan0x7fffffff |
| ATOM | 2456 | O3* | A B 216 | 9.281  | -37.344 | 125.532 | 0.00nan0x7fffffff |
| ATOM | 2457 | P   | G B 217 | 10.453 | -36.866 | 126.489 | 0.00nan0x7fffffff |
| ATOM | 2458 | O1P | G B 217 | 11.052 | -38.134 | 126.992 | 0.00nan0x7fffffff |
| ATOM | 2459 | O2P | G B 217 | 9.941  | -36.012 | 127.613 | 0.00nan0x7fffffff |
| ATOM | 2460 | O5* | G B 217 | 11.425 | -36.026 | 125.535 | 0.00nan0x7fffffff |
| ATOM | 2461 | C5* | G B 217 | 12.441 | -35.154 | 126.087 | 0.00nan0x7fffffff |
| ATOM | 2462 | C4* | G B 217 | 12.754 | -34.097 | 125.054 | 0.00nan0x7fffffff |
| ATOM | 2463 | C3* | G B 217 | 13.361 | -32.809 | 125.585 | 0.00nan0x7fffffff |
| ATOM | 2464 | O4* | G B 217 | 11.524 | -33.676 | 124.423 | 0.00nan0x7fffffff |
| ATOM | 2465 | O2* | G B 217 | 13.915 | -31.949 | 123.443 | 0.00nan0x7fffffff |
| ATOM | 2466 | C2* | G B 217 | 12.975 | -31.809 | 124.498 | 0.00nan0x7fffffff |
| ATOM | 2467 | C1* | G B 217 | 11.600 | -32.313 | 124.079 | 0.00nan0x7fffffff |
| ATOM | 2468 | N9  | G B 217 | 10.577 | -31.505 | 124.778 | 0.00nan0x7fffffff |
| ATOM | 2469 | C8  | G B 217 | 9.600  | -31.940 | 125.634 | 0.00nan0x7fffffff |
| ATOM | 2470 | N7  | G B 217 | 8.843  | -30.980 | 126.101 | 0.00nan0x7fffffff |
| ATOM | 2471 | C5  | G B 217 | 9.375  | -29.827 | 125.527 | 0.00nan0x7fffffff |
| ATOM | 2472 | O6  | G B 217 | 8.060  | -27.993 | 126.288 | 0.00nan0x7fffffff |
| ATOM | 2473 | C6  | G B 217 | 8.981  | -28.466 | 125.617 | 0.00nan0x7fffffff |
| ATOM | 2474 | N1  | G B 217 | 9.745  | -27.607 | 124.870 | 0.00nan0x7fffffff |
| ATOM | 2475 | N2  | G B 217 | 11.425 | -27.066 | 123.430 | 0.00nan0x7fffffff |
| ATOM | 2476 | C2  | G B 217 | 10.781 | -28.033 | 124.096 | 0.00nan0x7fffffff |
| ATOM | 2477 | N3  | G B 217 | 11.180 | -29.297 | 123.961 | 0.00nan0x7fffffff |
| ATOM | 2478 | C4  | G B 217 | 10.429 | -30.141 | 124.696 | 0.00nan0x7fffffff |
| ATOM | 2479 | O3* | G B 217 | 14.774 | -32.879 | 125.791 | 0.00nan0x7fffffff |
| ATOM | 2480 | P   | U B 218 | 15.474 | -32.192 | 127.070 | 0.00nan0x7fffffff |
| ATOM | 2481 | O1P | U B 218 | 16.665 | -33.050 | 127.307 | 0.00nan0x7fffffff |
| ATOM | 2482 | O2P | U B 218 | 14.541 | -32.189 | 128.244 | 0.00nan0x7fffffff |
| ATOM | 2483 | O5* | U B 218 | 15.807 | -30.715 | 126.585 | 0.00nan0x7fffffff |
| ATOM | 2484 | C5* | U B 218 | 16.488 | -30.499 | 125.322 | 0.00nan0x7fffffff |
| ATOM | 2485 | C4* | U B 218 | 16.500 | -29.009 | 125.084 | 0.00nan0x7fffffff |
| ATOM | 2486 | C3* | U B 218 | 16.685 | -28.135 | 126.313 | 0.00nan0x7fffffff |
| ATOM | 2487 | O4* | U B 218 | 15.215 | -28.608 | 124.555 | 0.00nan0x7fffffff |
| ATOM | 2488 | O2* | U B 218 | 17.018 | -26.129 | 125.088 | 0.00nan0x7fffffff |
| ATOM | 2489 | C2* | U B 218 | 16.050 | -26.822 | 125.863 | 0.00nan0x7fffffff |
| ATOM | 2490 | C1* | U B 218 | 14.897 | -27.310 | 124.996 | 0.00nan0x7fffffff |
| ATOM | 2491 | N1  | U B 218 | 13.660 | -27.277 | 125.807 | 0.00nan0x7fffffff |
| ATOM | 2492 | C6  | U B 218 | 13.027 | -28.410 | 126.225 | 0.00nan0x7fffffff |
| ATOM | 2493 | C5  | U B 218 | 11.903 | -28.379 | 126.956 | 0.00nan0x7fffffff |
| ATOM | 2494 | O4  | U B 218 | 10.314 | -26.942 | 127.976 | 0.00nan0x7fffffff |
| ATOM | 2495 | C4  | U B 218 | 11.367 | -27.103 | 127.293 | 0.00nan0x7fffffff |

|      |      |     |         |        |         |         |                   |
|------|------|-----|---------|--------|---------|---------|-------------------|
| ATOM | 2496 | N3  | U B 218 | 12.009 | -25.977 | 126.866 | 0.00nan0x7fffffff |
| ATOM | 2497 | O2  | U B 218 | 13.718 | -25.002 | 125.747 | 0.00nan0x7fffffff |
| ATOM | 2498 | C2  | U B 218 | 13.153 | -26.027 | 126.123 | 0.00nan0x7fffffff |
| ATOM | 2499 | O3* | U B 218 | 18.052 | -27.979 | 126.706 | 0.00nan0x7fffffff |
| ATOM | 2500 | P   | A B 219 | 18.473 | -27.937 | 128.259 | 0.00nan0x7fffffff |
| ATOM | 2501 | O1P | A B 219 | 19.931 | -28.224 | 128.225 | 0.00nan0x7fffffff |
| ATOM | 2502 | O2P | A B 219 | 17.714 | -28.964 | 129.043 | 0.00nan0x7fffffff |
| ATOM | 2503 | O5* | A B 219 | 18.100 | -26.459 | 128.721 | 0.00nan0x7fffffff |
| ATOM | 2504 | C5* | A B 219 | 18.880 | -25.329 | 128.253 | 0.00nan0x7fffffff |
| ATOM | 2505 | C4* | A B 219 | 18.099 | -24.083 | 128.594 | 0.00nan0x7fffffff |
| ATOM | 2506 | C3* | A B 219 | 17.965 | -23.755 | 130.071 | 0.00nan0x7fffffff |
| ATOM | 2507 | O4* | A B 219 | 16.735 | -24.247 | 128.142 | 0.00nan0x7fffffff |
| ATOM | 2508 | O2* | A B 219 | 17.072 | -21.584 | 129.714 | 0.00nan0x7fffffff |
| ATOM | 2509 | C2* | A B 219 | 16.699 | -22.902 | 130.089 | 0.00nan0x7fffffff |
| ATOM | 2510 | C1* | A B 219 | 15.857 | -23.565 | 129.006 | 0.00nan0x7fffffff |
| ATOM | 2511 | N9  | A B 219 | 14.893 | -24.473 | 129.661 | 0.00nan0x7fffffff |
| ATOM | 2512 | C8  | A B 219 | 14.837 | -25.841 | 129.596 | 0.00nan0x7fffffff |
| ATOM | 2513 | N7  | A B 219 | 13.859 | -26.364 | 130.293 | 0.00nan0x7fffffff |
| ATOM | 2514 | C5  | A B 219 | 13.229 | -25.261 | 130.858 | 0.00nan0x7fffffff |
| ATOM | 2515 | N6  | A B 219 | 11.412 | -26.199 | 132.158 | 0.00nan0x7fffffff |
| ATOM | 2516 | C6  | A B 219 | 12.108 | -25.160 | 131.717 | 0.00nan0x7fffffff |
| ATOM | 2517 | N1  | A B 219 | 11.766 | -23.886 | 132.076 | 0.00nan0x7fffffff |
| ATOM | 2518 | C2  | A B 219 | 12.464 | -22.806 | 131.631 | 0.00nan0x7fffffff |
| ATOM | 2519 | N3  | A B 219 | 13.525 | -22.832 | 130.827 | 0.00nan0x7fffffff |
| ATOM | 2520 | C4  | A B 219 | 13.854 | -24.092 | 130.478 | 0.00nan0x7fffffff |
| ATOM | 2521 | O3* | A B 219 | 19.099 | -23.069 | 130.610 | 0.00nan0x7fffffff |
| ATOM | 2522 | P   | C B 220 | 19.597 | -23.360 | 132.113 | 0.00nan0x7fffffff |
| ATOM | 2523 | O1P | C B 220 | 21.071 | -23.191 | 132.025 | 0.00nan0x7fffffff |
| ATOM | 2524 | O2P | C B 220 | 19.209 | -24.740 | 132.546 | 0.00nan0x7fffffff |
| ATOM | 2525 | O5* | C B 220 | 18.854 | -22.246 | 132.982 | 0.00nan0x7fffffff |
| ATOM | 2526 | C5* | C B 220 | 19.364 | -20.889 | 133.022 | 0.00nan0x7fffffff |
| ATOM | 2527 | C4* | C B 220 | 18.245 | -20.000 | 133.508 | 0.00nan0x7fffffff |
| ATOM | 2528 | C3* | C B 220 | 17.885 | -20.109 | 134.979 | 0.00nan0x7fffffff |
| ATOM | 2529 | O4* | C B 220 | 17.027 | -20.357 | 132.816 | 0.00nan0x7fffffff |
| ATOM | 2530 | O2* | C B 220 | 16.478 | -18.196 | 134.988 | 0.00nan0x7fffffff |
| ATOM | 2531 | C2* | C B 220 | 16.440 | -19.616 | 134.986 | 0.00nan0x7fffffff |
| ATOM | 2532 | C1* | C B 220 | 15.918 | -20.150 | 133.659 | 0.00nan0x7fffffff |
| ATOM | 2533 | N1  | C B 220 | 15.166 | -21.397 | 133.921 | 0.00nan0x7fffffff |
| ATOM | 2534 | C6  | C B 220 | 15.632 | -22.625 | 133.553 | 0.00nan0x7fffffff |
| ATOM | 2535 | C5  | C B 220 | 14.946 | -23.756 | 133.784 | 0.00nan0x7fffffff |
| ATOM | 2536 | N4  | C B 220 | 12.939 | -24.709 | 134.703 | 0.00nan0x7fffffff |
| ATOM | 2537 | C4  | C B 220 | 13.688 | -23.636 | 134.434 | 0.00nan0x7fffffff |
| ATOM | 2538 | N3  | C B 220 | 13.227 | -22.406 | 134.796 | 0.00nan0x7fffffff |
| ATOM | 2539 | O2  | C B 220 | 13.514 | -20.162 | 134.885 | 0.00nan0x7fffffff |
| ATOM | 2540 | C2  | C B 220 | 13.940 | -21.266 | 134.553 | 0.00nan0x7fffffff |
| ATOM | 2541 | O3* | C B 220 | 18.735 | -19.330 | 135.826 | 0.00nan0x7fffffff |
| ATOM | 2542 | P   | G B 221 | 19.063 | -19.827 | 137.318 | 0.00nan0x7fffffff |
| ATOM | 2543 | O1P | G B 221 | 20.449 | -19.344 | 137.549 | 0.00nan0x7fffffff |
| ATOM | 2544 | O2P | G B 221 | 18.955 | -21.316 | 137.426 | 0.00nan0x7fffffff |
| ATOM | 2545 | O5* | G B 221 | 17.954 | -19.098 | 138.209 | 0.00nan0x7fffffff |
| ATOM | 2546 | C5* | G B 221 | 17.578 | -17.728 | 137.917 | 0.00nan0x7fffffff |
| ATOM | 2547 | C4* | G B 221 | 16.252 | -17.473 | 138.592 | 0.00nan0x7fffffff |
| ATOM | 2548 | C3* | G B 221 | 16.136 | -17.922 | 140.039 | 0.00nan0x7fffffff |
| ATOM | 2549 | O4* | G B 221 | 15.224 | -18.220 | 137.904 | 0.00nan0x7fffffff |
| ATOM | 2550 | O2* | G B 221 | 14.073 | -16.814 | 140.429 | 0.00nan0x7fffffff |
| ATOM | 2551 | C2* | G B 221 | 14.627 | -18.100 | 140.191 | 0.00nan0x7fffffff |
| ATOM | 2552 | C1* | G B 221 | 14.230 | -18.624 | 138.817 | 0.00nan0x7fffffff |
| ATOM | 2553 | N9  | G B 221 | 14.102 | -20.094 | 138.899 | 0.00nan0x7fffffff |
| ATOM | 2554 | C8  | G B 221 | 14.894 | -21.045 | 138.310 | 0.00nan0x7fffffff |
| ATOM | 2555 | N7  | G B 221 | 14.522 | -22.273 | 138.568 | 0.00nan0x7fffffff |
| ATOM | 2556 | C5  | G B 221 | 13.404 | -22.118 | 139.384 | 0.00nan0x7fffffff |
| ATOM | 2557 | O6  | G B 221 | 12.624 | -24.301 | 139.928 | 0.00nan0x7fffffff |
| ATOM | 2558 | C6  | G B 221 | 12.549 | -23.072 | 139.996 | 0.00nan0x7fffffff |
| ATOM | 2559 | N1  | G B 221 | 11.535 | -22.526 | 140.740 | 0.00nan0x7fffffff |



|      |      |     |         |        |         |         |                   |
|------|------|-----|---------|--------|---------|---------|-------------------|
| ATOM | 2560 | N2  | G B 221 | 10.329 | -20.814 | 141.635 | 0.00nan0x7fffffff |
| ATOM | 2561 | C2  | G B 221 | 11.368 | -21.182 | 140.875 | 0.00nan0x7fffffff |
| ATOM | 2562 | N3  | G B 221 | 12.139 | -20.245 | 140.323 | 0.00nan0x7fffffff |
| ATOM | 2563 | C4  | G B 221 | 13.136 | -20.783 | 139.593 | 0.00nan0x7fffffff |
| ATOM | 2564 | O3* | G B 221 | 16.676 | -16.986 | 140.975 | 0.00nan0x7fffffff |
| ATOM | 2565 | P   | A B 222 | 17.464 | -17.482 | 142.288 | 0.00nan0x7fffffff |
| ATOM | 2566 | O1P | A B 222 | 18.418 | -16.373 | 142.554 | 0.00nan0x7fffffff |
| ATOM | 2567 | O2P | A B 222 | 18.166 | -18.780 | 142.028 | 0.00nan0x7fffffff |
| ATOM | 2568 | O5* | A B 222 | 16.321 | -17.648 | 143.385 | 0.00nan0x7fffffff |
| ATOM | 2569 | C5* | A B 222 | 15.399 | -16.559 | 143.650 | 0.00nan0x7fffffff |
| ATOM | 2570 | C4* | A B 222 | 14.266 | -17.131 | 144.468 | 0.00nan0x7fffffff |
| ATOM | 2571 | C3* | A B 222 | 14.661 | -18.052 | 145.610 | 0.00nan0x7fffffff |
| ATOM | 2572 | O4* | A B 222 | 13.443 | -17.958 | 143.614 | 0.00nan0x7fffffff |
| ATOM | 2573 | O2* | A B 222 | 12.492 | -18.127 | 146.572 | 0.00nan0x7fffffff |
| ATOM | 2574 | C2* | A B 222 | 13.398 | -18.891 | 145.788 | 0.00nan0x7fffffff |
| ATOM | 2575 | C1* | A B 222 | 12.905 | -19.029 | 144.354 | 0.00nan0x7fffffff |
| ATOM | 2576 | N9  | A B 222 | 13.335 | -20.344 | 143.837 | 0.00nan0x7fffffff |
| ATOM | 2577 | C8  | A B 222 | 14.268 | -20.610 | 142.870 | 0.00nan0x7fffffff |
| ATOM | 2578 | N7  | A B 222 | 14.424 | -21.887 | 142.622 | 0.00nan0x7fffffff |
| ATOM | 2579 | C5  | A B 222 | 13.527 | -22.503 | 143.489 | 0.00nan0x7fffffff |
| ATOM | 2580 | N6  | A B 222 | 13.794 | -24.871 | 143.053 | 0.00nan0x7fffffff |
| ATOM | 2581 | C6  | A B 222 | 13.220 | -23.868 | 143.704 | 0.00nan0x7fffffff |
| ATOM | 2582 | N1  | A B 222 | 12.266 | -24.105 | 144.653 | 0.00nan0x7fffffff |
| ATOM | 2583 | C2  | A B 222 | 11.665 | -23.089 | 145.332 | 0.00nan0x7fffffff |
| ATOM | 2584 | N3  | A B 222 | 11.907 | -21.789 | 145.178 | 0.00nan0x7fffffff |
| ATOM | 2585 | C4  | A B 222 | 12.849 | -21.566 | 144.239 | 0.00nan0x7fffffff |
| ATOM | 2586 | O3* | A B 222 | 15.033 | -17.356 | 146.803 | 0.00nan0x7fffffff |
| ATOM | 2587 | P   | A B 223 | 16.223 | -17.896 | 147.742 | 0.00nan0x7fffffff |
| ATOM | 2588 | O1P | A B 223 | 16.761 | -16.655 | 148.360 | 0.00nan0x7fffffff |
| ATOM | 2589 | O2P | A B 223 | 17.257 | -18.616 | 146.931 | 0.00nan0x7fffffff |
| ATOM | 2590 | O5* | A B 223 | 15.494 | -18.879 | 148.762 | 0.00nan0x7fffffff |
| ATOM | 2591 | C5* | A B 223 | 14.309 | -18.443 | 149.477 | 0.00nan0x7fffffff |
| ATOM | 2592 | C4* | A B 223 | 13.665 | -19.678 | 150.059 | 0.00nan0x7fffffff |
| ATOM | 2593 | C3* | A B 223 | 14.603 | -20.685 | 150.702 | 0.00nan0x7fffffff |
| ATOM | 2594 | O4* | A B 223 | 13.024 | -20.418 | 148.995 | 0.00nan0x7fffffff |
| ATOM | 2595 | O2* | A B 223 | 12.871 | -21.981 | 151.681 | 0.00nan0x7fffffff |
| ATOM | 2596 | C2* | A B 223 | 13.794 | -21.976 | 150.602 | 0.00nan0x7fffffff |
| ATOM | 2597 | C1* | A B 223 | 13.081 | -21.799 | 149.268 | 0.00nan0x7fffffff |
| ATOM | 2598 | N9  | A B 223 | 13.827 | -22.548 | 148.236 | 0.00nan0x7fffffff |
| ATOM | 2599 | C8  | A B 223 | 14.563 | -22.049 | 147.193 | 0.00nan0x7fffffff |
| ATOM | 2600 | N7  | A B 223 | 15.104 | -22.973 | 146.439 | 0.00nan0x7fffffff |
| ATOM | 2601 | C5  | A B 223 | 14.691 | -24.164 | 147.027 | 0.00nan0x7fffffff |
| ATOM | 2602 | N6  | A B 223 | 15.678 | -25.894 | 145.649 | 0.00nan0x7fffffff |
| ATOM | 2603 | C6  | A B 223 | 14.941 | -25.514 | 146.683 | 0.00nan0x7fffffff |
| ATOM | 2604 | N1  | A B 223 | 14.359 | -26.438 | 147.506 | 0.00nan0x7fffffff |
| ATOM | 2605 | C2  | A B 223 | 13.599 | -26.068 | 148.572 | 0.00nan0x7fffffff |
| ATOM | 2606 | N3  | A B 223 | 13.326 | -24.820 | 148.948 | 0.00nan0x7fffffff |
| ATOM | 2607 | C4  | A B 223 | 13.903 | -23.917 | 148.131 | 0.00nan0x7fffffff |
| ATOM | 2608 | O3* | A B 223 | 14.954 | -20.359 | 152.050 | 0.00nan0x7fffffff |
| ATOM | 2609 | P   | G B 224 | 16.433 | -20.650 | 152.615 | 0.00nan0x7fffffff |
| ATOM | 2610 | O1P | G B 224 | 16.625 | -19.588 | 153.636 | 0.00nan0x7fffffff |
| ATOM | 2611 | O2P | G B 224 | 17.449 | -20.569 | 151.517 | 0.00nan0x7fffffff |
| ATOM | 2612 | O5* | G B 224 | 16.333 | -22.127 | 153.207 | 0.00nan0x7fffffff |
| ATOM | 2613 | C5* | G B 224 | 15.245 | -22.484 | 154.098 | 0.00nan0x7fffffff |
| ATOM | 2614 | C4* | G B 224 | 15.211 | -23.991 | 154.174 | 0.00nan0x7fffffff |
| ATOM | 2615 | C3* | G B 224 | 16.555 | -24.688 | 154.302 | 0.00nan0x7fffffff |
| ATOM | 2616 | O4* | G B 224 | 14.658 | -24.509 | 152.943 | 0.00nan0x7fffffff |
| ATOM | 2617 | O2* | G B 224 | 15.632 | -26.823 | 154.781 | 0.00nan0x7fffffff |
| ATOM | 2618 | C2* | G B 224 | 16.244 | -26.074 | 153.741 | 0.00nan0x7fffffff |
| ATOM | 2619 | C1* | G B 224 | 15.248 | -25.751 | 152.635 | 0.00nan0x7fffffff |
| ATOM | 2620 | N9  | G B 224 | 15.971 | -25.728 | 151.348 | 0.00nan0x7fffffff |
| ATOM | 2621 | C8  | G B 224 | 16.249 | -24.646 | 150.554 | 0.00nan0x7fffffff |
| ATOM | 2622 | N7  | G B 224 | 16.905 | -24.947 | 149.462 | 0.00nan0x7fffffff |
| ATOM | 2623 | C5  | G B 224 | 17.068 | -26.328 | 149.542 | 0.00nan0x7fffffff |

|      |      |     |         |        |         |         |                   |
|------|------|-----|---------|--------|---------|---------|-------------------|
| ATOM | 2624 | O6  | G B 224 | 18.258 | -27.009 | 147.595 | 0.00nan0x7fffffff |
| ATOM | 2625 | C6  | G B 224 | 17.696 | -27.251 | 148.665 | 0.00nan0x7fffffff |
| ATOM | 2626 | N1  | G B 224 | 17.653 | -28.554 | 149.093 | 0.00nan0x7fffffff |
| ATOM | 2627 | N2  | G B 224 | 17.102 | -30.233 | 150.530 | 0.00nan0x7fffffff |
| ATOM | 2628 | C2  | G B 224 | 17.056 | -28.922 | 150.260 | 0.00nan0x7fffffff |
| ATOM | 2629 | N3  | G B 224 | 16.454 | -28.098 | 151.116 | 0.00nan0x7fffffff |
| ATOM | 2630 | C4  | G B 224 | 16.497 | -26.819 | 150.696 | 0.00nan0x7fffffff |
| ATOM | 2631 | O3* | G B 224 | 17.048 | -24.736 | 155.644 | 0.00nan0x7fffffff |
| ATOM | 2632 | P   | A B 225 | 18.620 | -24.583 | 155.954 | 0.00nan0x7fffffff |
| ATOM | 2633 | O1P | A B 225 | 18.643 | -23.951 | 157.299 | 0.00nan0x7fffffff |
| ATOM | 2634 | O2P | A B 225 | 19.287 | -23.732 | 154.918 | 0.00nan0x7fffffff |
| ATOM | 2635 | O5* | A B 225 | 19.165 | -26.081 | 155.917 | 0.00nan0x7fffffff |
| ATOM | 2636 | C5* | A B 225 | 18.471 | -27.130 | 156.641 | 0.00nan0x7fffffff |
| ATOM | 2637 | C4* | A B 225 | 18.982 | -28.448 | 156.110 | 0.00nan0x7fffffff |
| ATOM | 2638 | C3* | A B 225 | 20.480 | -28.541 | 155.872 | 0.00nan0x7fffffff |
| ATOM | 2639 | O4* | A B 225 | 18.400 | -28.685 | 154.808 | 0.00nan0x7fffffff |
| ATOM | 2640 | O2* | A B 225 | 20.482 | -30.887 | 155.511 | 0.00nan0x7fffffff |
| ATOM | 2641 | C2* | A B 225 | 20.562 | -29.647 | 154.823 | 0.00nan0x7fffffff |
| ATOM | 2642 | C1* | A B 225 | 19.308 | -29.393 | 153.997 | 0.00nan0x7fffffff |
| ATOM | 2643 | N9  | A B 225 | 19.692 | -28.639 | 152.787 | 0.00nan0x7fffffff |
| ATOM | 2644 | C8  | A B 225 | 19.409 | -27.335 | 152.475 | 0.00nan0x7fffffff |
| ATOM | 2645 | N7  | A B 225 | 19.884 | -26.953 | 151.316 | 0.00nan0x7fffffff |
| ATOM | 2646 | C5  | A B 225 | 20.524 | -28.089 | 150.830 | 0.00nan0x7fffffff |
| ATOM | 2647 | N6  | A B 225 | 21.415 | -27.411 | 148.682 | 0.00nan0x7fffffff |
| ATOM | 2648 | C6  | A B 225 | 21.231 | -28.323 | 149.627 | 0.00nan0x7fffffff |
| ATOM | 2649 | N1  | A B 225 | 21.733 | -29.587 | 149.487 | 0.00nan0x7fffffff |
| ATOM | 2650 | C2  | A B 225 | 21.556 | -30.537 | 150.445 | 0.00nan0x7fffffff |
| ATOM | 2651 | N3  | A B 225 | 20.903 | -30.382 | 151.595 | 0.00nan0x7fffffff |
| ATOM | 2652 | C4  | A B 225 | 20.411 | -29.133 | 151.724 | 0.00nan0x7fffffff |
| ATOM | 2653 | O3* | A B 225 | 21.226 | -28.847 | 157.054 | 0.00nan0x7fffffff |
| ATOM | 2654 | P   | A B 226 | 22.675 | -28.195 | 157.311 | 0.00nan0x7fffffff |
| ATOM | 2655 | O1P | A B 226 | 22.752 | -28.105 | 158.792 | 0.00nan0x7fffffff |
| ATOM | 2656 | O2P | A B 226 | 22.781 | -26.852 | 156.656 | 0.00nan0x7fffffff |
| ATOM | 2657 | O5* | A B 226 | 23.686 | -29.242 | 156.659 | 0.00nan0x7fffffff |
| ATOM | 2658 | C5* | A B 226 | 23.554 | -30.658 | 156.945 | 0.00nan0x7fffffff |
| ATOM | 2659 | C4* | A B 226 | 24.368 | -31.398 | 155.911 | 0.00nan0x7fffffff |
| ATOM | 2660 | C3* | A B 226 | 25.724 | -30.803 | 155.572 | 0.00nan0x7fffffff |
| ATOM | 2661 | O4* | A B 226 | 23.651 | -31.387 | 154.655 | 0.00nan0x7fffffff |
| ATOM | 2662 | O2* | A B 226 | 26.461 | -32.679 | 154.318 | 0.00nan0x7fffffff |
| ATOM | 2663 | C2* | A B 226 | 25.967 | -31.356 | 154.169 | 0.00nan0x7fffffff |
| ATOM | 2664 | C1* | A B 226 | 24.562 | -31.356 | 153.582 | 0.00nan0x7fffffff |
| ATOM | 2665 | N9  | A B 226 | 24.407 | -30.149 | 152.744 | 0.00nan0x7fffffff |
| ATOM | 2666 | C8  | A B 226 | 23.634 | -29.043 | 152.987 | 0.00nan0x7fffffff |
| ATOM | 2667 | N7  | A B 226 | 23.700 | -28.134 | 152.045 | 0.00nan0x7fffffff |
| ATOM | 2668 | C5  | A B 226 | 24.576 | -28.686 | 151.115 | 0.00nan0x7fffffff |
| ATOM | 2669 | N6  | A B 226 | 24.718 | -27.025 | 149.357 | 0.00nan0x7fffffff |
| ATOM | 2670 | C6  | A B 226 | 25.057 | -28.197 | 149.877 | 0.00nan0x7fffffff |
| ATOM | 2671 | N1  | A B 226 | 25.921 | -29.029 | 149.222 | 0.00nan0x7fffffff |
| ATOM | 2672 | C2  | A B 226 | 26.282 | -30.236 | 149.739 | 0.00nan0x7fffffff |
| ATOM | 2673 | N3  | A B 226 | 25.867 | -30.752 | 150.893 | 0.00nan0x7fffffff |
| ATOM | 2674 | C4  | A B 226 | 25.015 | -29.925 | 151.531 | 0.00nan0x7fffffff |
| ATOM | 2675 | O3* | A B 226 | 26.755 | -31.167 | 156.494 | 0.00nan0x7fffffff |
| ATOM | 2676 | P   | G B 227 | 27.908 | -30.120 | 156.900 | 0.00nan0x7fffffff |
| ATOM | 2677 | O1P | G B 227 | 28.250 | -30.510 | 158.293 | 0.00nan0x7fffffff |
| ATOM | 2678 | O2P | G B 227 | 27.403 | -28.712 | 156.815 | 0.00nan0x7fffffff |
| ATOM | 2679 | O5* | G B 227 | 29.063 | -30.390 | 155.835 | 0.00nan0x7fffffff |
| ATOM | 2680 | C5* | G B 227 | 29.493 | -31.746 | 155.552 | 0.00nan0x7fffffff |
| ATOM | 2681 | C4* | G B 227 | 30.279 | -31.704 | 154.263 | 0.00nan0x7fffffff |
| ATOM | 2682 | C3* | G B 227 | 31.244 | -30.542 | 154.103 | 0.00nan0x7fffffff |
| ATOM | 2683 | O4* | G B 227 | 29.357 | -31.555 | 153.159 | 0.00nan0x7fffffff |
| ATOM | 2684 | O2* | G B 227 | 32.304 | -31.424 | 152.171 | 0.00nan0x7fffffff |
| ATOM | 2685 | C2* | G B 227 | 31.365 | -30.442 | 152.584 | 0.00nan0x7fffffff |
| ATOM | 2686 | C1* | G B 227 | 29.957 | -30.802 | 152.131 | 0.00nan0x7fffffff |
| ATOM | 2687 | N9  | G B 227 | 29.224 | -29.551 | 151.848 | 0.00nan0x7fffffff |

|      |      |     |         |        |         |         |                   |
|------|------|-----|---------|--------|---------|---------|-------------------|
| ATOM | 2688 | C8  | G B 227 | 28.185 | -29.003 | 152.553 | 0.00nan0x7fffffff |
| ATOM | 2689 | N7  | G B 227 | 27.736 | -27.882 | 152.046 | 0.00nan0x7fffffff |
| ATOM | 2690 | C5  | G B 227 | 28.537 | -27.681 | 150.924 | 0.00nan0x7fffffff |
| ATOM | 2691 | O6  | G B 227 | 27.816 | -25.655 | 149.901 | 0.00nan0x7fffffff |
| ATOM | 2692 | C6  | G B 227 | 28.549 | -26.645 | 149.954 | 0.00nan0x7fffffff |
| ATOM | 2693 | N1  | G B 227 | 29.503 | -26.796 | 148.979 | 0.00nan0x7fffffff |
| ATOM | 2694 | N2  | G B 227 | 31.228 | -27.851 | 147.932 | 0.00nan0x7fffffff |
| ATOM | 2695 | C2  | G B 227 | 30.359 | -27.854 | 148.950 | 0.00nan0x7fffffff |
| ATOM | 2696 | N3  | G B 227 | 30.389 | -28.851 | 149.833 | 0.00nan0x7fffffff |
| ATOM | 2697 | C4  | G B 227 | 29.453 | -28.701 | 150.791 | 0.00nan0x7fffffff |
| ATOM | 2698 | O3* | G B 227 | 32.505 | -30.755 | 154.743 | 0.00nan0x7fffffff |
| ATOM | 2699 | P   | A B 228 | 33.286 | -29.541 | 155.457 | 0.00nan0x7fffffff |
| ATOM | 2700 | O1P | A B 228 | 34.035 | -30.212 | 156.551 | 0.00nan0x7fffffff |
| ATOM | 2701 | O2P | A B 228 | 32.321 | -28.519 | 155.976 | 0.00nan0x7fffffff |
| ATOM | 2702 | O5* | A B 228 | 34.202 | -28.941 | 154.298 | 0.00nan0x7fffffff |
| ATOM | 2703 | C5* | A B 228 | 35.010 | -29.822 | 153.476 | 0.00nan0x7fffffff |
| ATOM | 2704 | C4* | A B 228 | 35.440 | -29.029 | 152.266 | 0.00nan0x7fffffff |
| ATOM | 2705 | C3* | A B 228 | 35.886 | -27.600 | 152.523 | 0.00nan0x7fffffff |
| ATOM | 2706 | O4* | A B 228 | 34.313 | -28.893 | 151.371 | 0.00nan0x7fffffff |
| ATOM | 2707 | O2* | A B 228 | 36.752 | -27.261 | 150.339 | 0.00nan0x7fffffff |
| ATOM | 2708 | C2* | A B 228 | 35.641 | -26.945 | 151.166 | 0.00nan0x7fffffff |
| ATOM | 2709 | C1* | A B 228 | 34.383 | -27.660 | 150.693 | 0.00nan0x7fffffff |
| ATOM | 2710 | N9  | A B 228 | 33.220 | -26.794 | 150.977 | 0.00nan0x7fffffff |
| ATOM | 2711 | C8  | A B 228 | 32.231 | -26.982 | 151.907 | 0.00nan0x7fffffff |
| ATOM | 2712 | N7  | A B 228 | 31.326 | -26.034 | 151.915 | 0.00nan0x7fffffff |
| ATOM | 2713 | C5  | A B 228 | 31.750 | -25.164 | 150.915 | 0.00nan0x7fffffff |
| ATOM | 2714 | N6  | A B 228 | 30.093 | -23.397 | 150.907 | 0.00nan0x7fffffff |
| ATOM | 2715 | C6  | A B 228 | 31.202 | -23.950 | 150.436 | 0.00nan0x7fffffff |
| ATOM | 2716 | N1  | A B 228 | 31.905 | -23.357 | 149.425 | 0.00nan0x7fffffff |
| ATOM | 2717 | C2  | A B 228 | 33.047 | -23.908 | 148.928 | 0.00nan0x7fffffff |
| ATOM | 2718 | N3  | A B 228 | 33.613 | -25.043 | 149.333 | 0.00nan0x7fffffff |
| ATOM | 2719 | C4  | A B 228 | 32.913 | -25.619 | 150.331 | 0.00nan0x7fffffff |
| ATOM | 2720 | O3* | A B 228 | 37.248 | -27.494 | 152.947 | 0.00nan0x7fffffff |
| ATOM | 2721 | P   | U B 229 | 37.693 | -26.395 | 154.036 | 0.00nan0x7fffffff |
| ATOM | 2722 | O1P | U B 229 | 38.831 | -27.046 | 154.735 | 0.00nan0x7fffffff |
| ATOM | 2723 | O2P | U B 229 | 36.562 | -26.079 | 154.967 | 0.00nan0x7fffffff |
| ATOM | 2724 | O5* | U B 229 | 38.095 | -25.126 | 153.157 | 0.00nan0x7fffffff |
| ATOM | 2725 | C5* | U B 229 | 38.981 | -25.278 | 152.018 | 0.00nan0x7fffffff |
| ATOM | 2726 | C4* | U B 229 | 38.858 | -24.022 | 151.190 | 0.00nan0x7fffffff |
| ATOM | 2727 | C3* | U B 229 | 38.826 | -22.712 | 151.958 | 0.00nan0x7fffffff |
| ATOM | 2728 | O4* | U B 229 | 37.598 | -24.050 | 150.482 | 0.00nan0x7fffffff |
| ATOM | 2729 | O2* | U B 229 | 39.064 | -21.343 | 150.033 | 0.00nan0x7fffffff |
| ATOM | 2730 | C2* | U B 229 | 38.103 | -21.792 | 150.977 | 0.00nan0x7fffffff |
| ATOM | 2731 | C1* | U B 229 | 37.101 | -22.741 | 150.334 | 0.00nan0x7fffffff |
| ATOM | 2732 | N1  | U B 229 | 35.793 | -22.556 | 151.001 | 0.00nan0x7fffffff |
| ATOM | 2733 | C6  | U B 229 | 35.245 | -23.504 | 151.814 | 0.00nan0x7fffffff |
| ATOM | 2734 | C5  | U B 229 | 34.057 | -23.337 | 152.415 | 0.00nan0x7fffffff |
| ATOM | 2735 | O4  | U B 229 | 32.233 | -21.844 | 152.684 | 0.00nan0x7fffffff |
| ATOM | 2736 | C4  | U B 229 | 33.359 | -22.118 | 152.176 | 0.00nan0x7fffffff |
| ATOM | 2737 | N3  | U B 229 | 33.918 | -21.181 | 151.358 | 0.00nan0x7fffffff |
| ATOM | 2738 | O2  | U B 229 | 35.616 | -20.510 | 150.020 | 0.00nan0x7fffffff |
| ATOM | 2739 | C2  | U B 229 | 35.129 | -21.366 | 150.755 | 0.00nan0x7fffffff |
| ATOM | 2740 | O3* | U B 229 | 40.123 | -22.226 | 152.314 | 0.00nan0x7fffffff |
| ATOM | 2741 | P   | U B 230 | 40.369 | -21.479 | 153.719 | 0.00nan0x7fffffff |
| ATOM | 2742 | O1P | U B 230 | 41.783 | -21.808 | 154.039 | 0.00nan0x7fffffff |
| ATOM | 2743 | O2P | U B 230 | 39.421 | -21.983 | 154.764 | 0.00nan0x7fffffff |
| ATOM | 2744 | O5* | U B 230 | 40.106 | -19.942 | 153.387 | 0.00nan0x7fffffff |
| ATOM | 2745 | C5* | U B 230 | 40.731 | -19.328 | 152.231 | 0.00nan0x7fffffff |
| ATOM | 2746 | C4* | U B 230 | 40.009 | -18.027 | 151.974 | 0.00nan0x7fffffff |
| ATOM | 2747 | C3* | U B 230 | 39.686 | -17.186 | 153.197 | 0.00nan0x7fffffff |
| ATOM | 2748 | O4* | U B 230 | 38.718 | -18.316 | 151.391 | 0.00nan0x7fffffff |
| ATOM | 2749 | O2* | U B 230 | 39.025 | -15.272 | 151.957 | 0.00nan0x7fffffff |
| ATOM | 2750 | C2* | U B 230 | 38.500 | -16.360 | 152.704 | 0.00nan0x7fffffff |
| ATOM | 2751 | C1* | U B 230 | 37.779 | -17.351 | 151.801 | 0.00nan0x7fffffff |

|      |      |     |     |     |        |         |         |                   |
|------|------|-----|-----|-----|--------|---------|---------|-------------------|
| ATOM | 2752 | N1  | U B | 230 | 36.658 | -17.944 | 152.564 | 0.00nan0x7fffffff |
| ATOM | 2753 | C6  | U B | 230 | 36.655 | -19.246 | 152.969 | 0.00nan0x7fffffff |
| ATOM | 2754 | C5  | U B | 230 | 35.637 | -19.784 | 153.657 | 0.00nan0x7fffffff |
| ATOM | 2755 | O4  | U B | 230 | 33.508 | -19.335 | 154.603 | 0.00nan0x7fffffff |
| ATOM | 2756 | C4  | U B | 230 | 34.527 | -18.944 | 153.962 | 0.00nan0x7fffffff |
| ATOM | 2757 | N3  | U B | 230 | 34.542 | -17.645 | 153.549 | 0.00nan0x7fffffff |
| ATOM | 2758 | O2  | U B | 230 | 35.583 | -15.939 | 152.485 | 0.00nan0x7fffffff |
| ATOM | 2759 | C2  | U B | 230 | 35.587 | -17.112 | 152.849 | 0.00nan0x7fffffff |
| ATOM | 2760 | O3* | U B | 230 | 40.778 | -16.373 | 153.636 | 0.00nan0x7fffffff |
| ATOM | 2761 | P   | A B | 231 | 41.041 | -16.115 | 155.203 | 0.00nan0x7fffffff |
| ATOM | 2762 | O1P | A B | 231 | 42.512 | -15.918 | 155.275 | 0.00nan0x7fffffff |
| ATOM | 2763 | O2P | A B | 231 | 40.586 | -17.287 | 156.019 | 0.00nan0x7fffffff |
| ATOM | 2764 | O5* | A B | 231 | 40.182 | -14.812 | 155.527 | 0.00nan0x7fffffff |
| ATOM | 2765 | C5* | A B | 231 | 40.281 | -13.642 | 154.674 | 0.00nan0x7fffffff |
| ATOM | 2766 | C4* | A B | 231 | 39.108 | -12.751 | 155.007 | 0.00nan0x7fffffff |
| ATOM | 2767 | C3* | A B | 231 | 38.783 | -12.591 | 156.482 | 0.00nan0x7fffffff |
| ATOM | 2768 | O4* | A B | 231 | 37.909 | -13.325 | 154.439 | 0.00nan0x7fffffff |
| ATOM | 2769 | O2* | A B | 231 | 37.235 | -10.821 | 156.159 | 0.00nan0x7fffffff |
| ATOM | 2770 | C2* | A B | 231 | 37.305 | -12.211 | 156.438 | 0.00nan0x7fffffff |
| ATOM | 2771 | C1* | A B | 231 | 36.802 | -13.036 | 155.261 | 0.00nan0x7fffffff |
| ATOM | 2772 | N9  | A B | 231 | 36.156 | -14.255 | 155.787 | 0.00nan0x7fffffff |
| ATOM | 2773 | C8  | A B | 231 | 36.594 | -15.551 | 155.702 | 0.00nan0x7fffffff |
| ATOM | 2774 | N7  | A B | 231 | 35.791 | -16.420 | 156.264 | 0.00nan0x7fffffff |
| ATOM | 2775 | C5  | A B | 231 | 34.748 | -15.638 | 156.750 | 0.00nan0x7fffffff |
| ATOM | 2776 | N6  | A B | 231 | 33.242 | -17.220 | 157.798 | 0.00nan0x7fffffff |
| ATOM | 2777 | C6  | A B | 231 | 33.569 | -15.981 | 157.456 | 0.00nan0x7fffffff |
| ATOM | 2778 | N1  | A B | 231 | 32.759 | -14.928 | 157.777 | 0.00nan0x7fffffff |
| ATOM | 2779 | C2  | A B | 231 | 33.077 | -13.650 | 157.435 | 0.00nan0x7fffffff |
| ATOM | 2780 | N3  | A B | 231 | 34.166 | -13.261 | 156.774 | 0.00nan0x7fffffff |
| ATOM | 2781 | C4  | A B | 231 | 34.958 | -14.306 | 156.462 | 0.00nan0x7fffffff |
| ATOM | 2782 | O3* | A B | 231 | 39.585 | -11.606 | 157.140 | 0.00nan0x7fffffff |
| ATOM | 2783 | P   | C B | 232 | 40.072 | -11.817 | 158.660 | 0.00nan0x7fffffff |
| ATOM | 2784 | O1P | C B | 232 | 41.378 | -11.108 | 158.702 | 0.00nan0x7fffffff |
| ATOM | 2785 | O2P | C B | 232 | 40.209 | -13.274 | 158.978 | 0.00nan0x7fffffff |
| ATOM | 2786 | O5* | C B | 232 | 38.921 | -11.136 | 159.528 | 0.00nan0x7fffffff |
| ATOM | 2787 | C5* | C B | 232 | 38.451 | -9.803  | 159.201 | 0.00nan0x7fffffff |
| ATOM | 2788 | C4* | C B | 232 | 37.140 | -9.606  | 159.924 | 0.00nan0x7fffffff |
| ATOM | 2789 | C3* | C B | 232 | 37.084 | -10.095 | 161.361 | 0.00nan0x7fffffff |
| ATOM | 2790 | O4* | C B | 232 | 36.114 | -10.369 | 159.249 | 0.00nan0x7fffffff |
| ATOM | 2791 | O2* | C B | 232 | 35.001 | -9.066  | 161.846 | 0.00nan0x7fffffff |
| ATOM | 2792 | C2* | C B | 232 | 35.588 | -10.326 | 161.556 | 0.00nan0x7fffffff |
| ATOM | 2793 | C1* | C B | 232 | 35.165 | -10.828 | 160.182 | 0.00nan0x7fffffff |
| ATOM | 2794 | N1  | C B | 232 | 35.091 | -12.305 | 160.229 | 0.00nan0x7fffffff |
| ATOM | 2795 | C6  | C B | 232 | 35.984 | -13.104 | 159.578 | 0.00nan0x7fffffff |
| ATOM | 2796 | C5  | C B | 232 | 35.914 | -14.444 | 159.618 | 0.00nan0x7fffffff |
| ATOM | 2797 | N4  | C B | 232 | 34.714 | -16.347 | 160.464 | 0.00nan0x7fffffff |
| ATOM | 2798 | C4  | C B | 232 | 34.857 | -15.022 | 160.372 | 0.00nan0x7fffffff |
| ATOM | 2799 | N3  | C B | 232 | 33.968 | -14.218 | 161.018 | 0.00nan0x7fffffff |
| ATOM | 2800 | O2  | C B | 232 | 33.246 | -12.139 | 161.553 | 0.00nan0x7fffffff |
| ATOM | 2801 | C2  | C B | 232 | 34.055 | -12.855 | 160.967 | 0.00nan0x7fffffff |
| ATOM | 2802 | O3* | C B | 232 | 37.624 | -9.163  | 162.302 | 0.00nan0x7fffffff |
| ATOM | 2803 | P   | C B | 233 | 38.453 | -9.670  | 163.586 | 0.00nan0x7fffffff |
| ATOM | 2804 | O1P | C B | 233 | 39.407 | -8.559  | 163.838 | 0.00nan0x7fffffff |
| ATOM | 2805 | O2P | C B | 233 | 39.153 | -10.962 | 163.294 | 0.00nan0x7fffffff |
| ATOM | 2806 | O5* | C B | 233 | 37.339 | -9.853  | 164.712 | 0.00nan0x7fffffff |
| ATOM | 2807 | C5* | C B | 233 | 36.390 | -8.788  | 164.979 | 0.00nan0x7fffffff |
| ATOM | 2808 | C4* | C B | 233 | 35.270 | -9.388  | 165.794 | 0.00nan0x7fffffff |
| ATOM | 2809 | C3* | C B | 233 | 35.683 | -10.318 | 166.922 | 0.00nan0x7fffffff |
| ATOM | 2810 | O4* | C B | 233 | 34.455 | -10.215 | 164.932 | 0.00nan0x7fffffff |
| ATOM | 2811 | O2* | C B | 233 | 33.518 | -10.436 | 167.891 | 0.00nan0x7fffffff |
| ATOM | 2812 | C2* | C B | 233 | 34.431 | -11.177 | 167.094 | 0.00nan0x7fffffff |
| ATOM | 2813 | C1* | C B | 233 | 33.935 | -11.302 | 165.660 | 0.00nan0x7fffffff |
| ATOM | 2814 | N1  | C B | 233 | 34.386 | -12.606 | 165.125 | 0.00nan0x7fffffff |
| ATOM | 2815 | C6  | C B | 233 | 35.335 | -12.709 | 164.151 | 0.00nan0x7fffffff |

|      |      |     |         |        |         |         |                   |
|------|------|-----|---------|--------|---------|---------|-------------------|
| ATOM | 2816 | C5  | C B 233 | 35.741 | -13.891 | 163.662 | 0.00nan0x7fffffff |
| ATOM | 2817 | N4  | C B 233 | 35.483 | -16.279 | 163.768 | 0.00nan0x7fffffff |
| ATOM | 2818 | C4  | C B 233 | 35.138 | -15.062 | 164.197 | 0.00nan0x7fffffff |
| ATOM | 2819 | N3  | C B 233 | 34.189 | -14.951 | 165.167 | 0.00nan0x7fffffff |
| ATOM | 2820 | O2  | C B 233 | 32.931 | -13.651 | 166.529 | 0.00nan0x7fffffff |
| ATOM | 2821 | C2  | C B 233 | 33.788 | -13.739 | 165.653 | 0.00nan0x7fffffff |
| ATOM | 2822 | O3* | C B 233 | 36.050 | -9.634  | 168.123 | 0.00nan0x7fffffff |
| ATOM | 2823 | P   | G B 234 | 37.249 | -10.174 | 169.050 | 0.00nan0x7fffffff |
| ATOM | 2824 | O1P | G B 234 | 37.781 | -8.936  | 169.678 | 0.00nan0x7fffffff |
| ATOM | 2825 | O2P | G B 234 | 38.283 | -10.880 | 168.227 | 0.00nan0x7fffffff |
| ATOM | 2826 | O5* | G B 234 | 36.530 | -11.173 | 170.064 | 0.00nan0x7fffffff |
| ATOM | 2827 | C5* | G B 234 | 35.342 | -10.752 | 170.782 | 0.00nan0x7fffffff |
| ATOM | 2828 | C4* | G B 234 | 34.706 | -11.997 | 171.353 | 0.00nan0x7fffffff |
| ATOM | 2829 | C3* | G B 234 | 35.650 | -13.002 | 171.989 | 0.00nan0x7fffffff |
| ATOM | 2830 | O4* | G B 234 | 34.072 | -12.733 | 170.282 | 0.00nan0x7fffffff |
| ATOM | 2831 | O2* | G B 234 | 33.926 | -14.317 | 172.955 | 0.00nan0x7fffffff |
| ATOM | 2832 | C2* | G B 234 | 34.850 | -14.298 | 171.877 | 0.00nan0x7fffffff |
| ATOM | 2833 | C1* | G B 234 | 34.137 | -14.115 | 170.544 | 0.00nan0x7fffffff |
| ATOM | 2834 | N9  | G B 234 | 34.889 | -14.851 | 169.508 | 0.00nan0x7fffffff |
| ATOM | 2835 | C8  | G B 234 | 35.626 | -14.337 | 168.473 | 0.00nan0x7fffffff |
| ATOM | 2836 | N7  | G B 234 | 36.175 | -15.249 | 167.712 | 0.00nan0x7fffffff |
| ATOM | 2837 | C5  | G B 234 | 35.765 | -16.451 | 168.285 | 0.00nan0x7fffffff |
| ATOM | 2838 | O6  | G B 234 | 36.705 | -18.207 | 166.980 | 0.00nan0x7fffffff |
| ATOM | 2839 | C6  | G B 234 | 36.026 | -17.799 | 167.924 | 0.00nan0x7fffffff |
| ATOM | 2840 | N1  | G B 234 | 35.438 | -18.726 | 168.746 | 0.00nan0x7fffffff |
| ATOM | 2841 | N2  | G B 234 | 34.172 | -19.403 | 170.513 | 0.00nan0x7fffffff |
| ATOM | 2842 | C2  | G B 234 | 34.671 | -18.376 | 169.815 | 0.00nan0x7fffffff |
| ATOM | 2843 | N3  | G B 234 | 34.396 | -17.129 | 170.196 | 0.00nan0x7fffffff |
| ATOM | 2844 | C4  | G B 234 | 34.974 | -16.219 | 169.388 | 0.00nan0x7fffffff |
| ATOM | 2845 | O3* | G B 234 | 35.998 | -12.685 | 173.340 | 0.00nan0x7fffffff |
| ATOM | 2846 | P   | G B 235 | 37.478 | -12.972 | 173.902 | 0.00nan0x7fffffff |
| ATOM | 2847 | O1P | G B 235 | 37.662 | -11.919 | 174.935 | 0.00nan0x7fffffff |
| ATOM | 2848 | O2P | G B 235 | 38.494 | -12.872 | 172.805 | 0.00nan0x7fffffff |
| ATOM | 2849 | O5* | G B 235 | 37.388 | -14.456 | 174.479 | 0.00nan0x7fffffff |
| ATOM | 2850 | C5* | G B 235 | 36.348 | -14.809 | 175.426 | 0.00nan0x7fffffff |
| ATOM | 2851 | C4* | G B 235 | 36.294 | -16.317 | 175.482 | 0.00nan0x7fffffff |
| ATOM | 2852 | C3* | G B 235 | 37.629 | -17.033 | 175.596 | 0.00nan0x7fffffff |
| ATOM | 2853 | O4* | G B 235 | 35.731 | -16.811 | 174.245 | 0.00nan0x7fffffff |
| ATOM | 2854 | O2* | G B 235 | 36.679 | -19.162 | 176.048 | 0.00nan0x7fffffff |
| ATOM | 2855 | C2* | G B 235 | 37.298 | -18.407 | 175.017 | 0.00nan0x7fffffff |
| ATOM | 2856 | C1* | G B 235 | 36.303 | -18.056 | 173.919 | 0.00nan0x7fffffff |
| ATOM | 2857 | N9  | G B 235 | 37.024 | -18.024 | 172.630 | 0.00nan0x7fffffff |
| ATOM | 2858 | C8  | G B 235 | 37.301 | -16.937 | 171.842 | 0.00nan0x7fffffff |
| ATOM | 2859 | N7  | G B 235 | 37.956 | -17.231 | 170.748 | 0.00nan0x7fffffff |
| ATOM | 2860 | C5  | G B 235 | 38.119 | -18.613 | 170.819 | 0.00nan0x7fffffff |
| ATOM | 2861 | O6  | G B 235 | 39.308 | -19.281 | 168.867 | 0.00nan0x7fffffff |
| ATOM | 2862 | C6  | G B 235 | 38.748 | -19.530 | 169.937 | 0.00nan0x7fffffff |
| ATOM | 2863 | N1  | G B 235 | 38.706 | -20.836 | 170.357 | 0.00nan0x7fffffff |
| ATOM | 2864 | N2  | G B 235 | 38.158 | -22.523 | 171.784 | 0.00nan0x7fffffff |
| ATOM | 2865 | C2  | G B 235 | 38.111 | -21.211 | 171.522 | 0.00nan0x7fffffff |
| ATOM | 2866 | N3  | G B 235 | 37.508 | -20.392 | 172.384 | 0.00nan0x7fffffff |
| ATOM | 2867 | C4  | G B 235 | 37.550 | -19.111 | 171.971 | 0.00nan0x7fffffff |
| ATOM | 2868 | O3* | G B 235 | 38.126 | -17.106 | 176.935 | 0.00nan0x7fffffff |
| ATOM | 2869 | P   | G B 236 | 39.701 | -16.971 | 177.242 | 0.00nan0x7fffffff |
| ATOM | 2870 | O1P | G B 236 | 39.734 | -16.384 | 178.607 | 0.00nan0x7fffffff |
| ATOM | 2871 | O2P | G B 236 | 40.367 | -16.088 | 176.231 | 0.00nan0x7fffffff |
| ATOM | 2872 | O5* | G B 236 | 40.240 | -18.468 | 177.153 | 0.00nan0x7fffffff |
| ATOM | 2873 | C5* | G B 236 | 39.631 | -19.512 | 177.955 | 0.00nan0x7fffffff |
| ATOM | 2874 | C4* | G B 236 | 40.104 | -20.832 | 177.396 | 0.00nan0x7fffffff |
| ATOM | 2875 | C3* | G B 236 | 41.594 | -20.953 | 177.125 | 0.00nan0x7fffffff |
| ATOM | 2876 | O4* | G B 236 | 39.491 | -21.039 | 176.102 | 0.00nan0x7fffffff |
| ATOM | 2877 | O2* | G B 236 | 41.538 | -23.294 | 176.734 | 0.00nan0x7fffffff |
| ATOM | 2878 | C2* | G B 236 | 41.631 | -22.047 | 176.061 | 0.00nan0x7fffffff |
| ATOM | 2879 | C1* | G B 236 | 40.367 | -21.755 | 175.264 | 0.00nan0x7fffffff |

|      |      |     |         |        |         |         |                   |
|------|------|-----|---------|--------|---------|---------|-------------------|
| ATOM | 2880 | N9  | G B 236 | 40.746 | -20.989 | 174.059 | 0.00nan0x7fffffff |
| ATOM | 2881 | C8  | G B 236 | 40.460 | -19.681 | 173.764 | 0.00nan0x7fffffff |
| ATOM | 2882 | N7  | G B 236 | 40.935 | -19.285 | 172.611 | 0.00nan0x7fffffff |
| ATOM | 2883 | C5  | G B 236 | 41.580 | -20.413 | 172.110 | 0.00nan0x7fffffff |
| ATOM | 2884 | O6  | G B 236 | 42.496 | -19.818 | 169.994 | 0.00nan0x7fffffff |
| ATOM | 2885 | C6  | G B 236 | 42.291 | -20.629 | 170.900 | 0.00nan0x7fffffff |
| ATOM | 2886 | N1  | G B 236 | 42.792 | -21.898 | 170.760 | 0.00nan0x7fffffff |
| ATOM | 2887 | N2  | G B 236 | 43.172 | -24.046 | 171.411 | 0.00nan0x7fffffff |
| ATOM | 2888 | C2  | G B 236 | 42.619 | -22.863 | 171.704 | 0.00nan0x7fffffff |
| ATOM | 2889 | N3  | G B 236 | 41.962 | -22.714 | 172.854 | 0.00nan0x7fffffff |
| ATOM | 2890 | C4  | G B 236 | 41.470 | -21.467 | 172.991 | 0.00nan0x7fffffff |
| ATOM | 2891 | O3* | G B 236 | 42.363 | -21.286 | 178.285 | 0.00nan0x7fffffff |
| ATOM | 2892 | P   | G B 237 | 43.826 | -20.654 | 178.516 | 0.00nan0x7fffffff |
| ATOM | 2893 | O1P | G B 237 | 44.009 | -20.748 | 179.988 | 0.00nan0x7fffffff |
| ATOM | 2894 | O2P | G B 237 | 43.876 | -19.238 | 178.029 | 0.00nan0x7fffffff |
| ATOM | 2895 | O5* | G B 237 | 44.790 | -21.597 | 177.667 | 0.00nan0x7fffffff |
| ATOM | 2896 | C5* | G B 237 | 45.158 | -22.906 | 178.173 | 0.00nan0x7fffffff |
| ATOM | 2897 | C4* | G B 237 | 45.777 | -23.667 | 177.026 | 0.00nan0x7fffffff |
| ATOM | 2898 | C3* | G B 237 | 47.110 | -23.147 | 176.515 | 0.00nan0x7fffffff |
| ATOM | 2899 | O4* | G B 237 | 44.898 | -23.585 | 175.881 | 0.00nan0x7fffffff |
| ATOM | 2900 | O2* | G B 237 | 47.545 | -25.044 | 175.155 | 0.00nan0x7fffffff |
| ATOM | 2901 | C2* | G B 237 | 47.124 | -23.690 | 175.089 | 0.00nan0x7fffffff |
| ATOM | 2902 | C1* | G B 237 | 45.656 | -23.590 | 174.695 | 0.00nan0x7fffffff |
| ATOM | 2903 | N9  | G B 237 | 45.471 | -22.360 | 173.897 | 0.00nan0x7fffffff |
| ATOM | 2904 | C8  | G B 237 | 44.675 | -21.281 | 174.179 | 0.00nan0x7fffffff |
| ATOM | 2905 | N7  | G B 237 | 44.718 | -20.342 | 173.269 | 0.00nan0x7fffffff |
| ATOM | 2906 | C5  | G B 237 | 45.604 | -20.840 | 172.318 | 0.00nan0x7fffffff |
| ATOM | 2907 | O6  | G B 237 | 45.772 | -19.210 | 170.590 | 0.00nan0x7fffffff |
| ATOM | 2908 | C6  | G B 237 | 46.071 | -20.296 | 171.092 | 0.00nan0x7fffffff |
| ATOM | 2909 | N1  | G B 237 | 46.955 | -21.099 | 170.418 | 0.00nan0x7fffffff |
| ATOM | 2910 | N2  | G B 237 | 48.215 | -22.971 | 170.111 | 0.00nan0x7fffffff |
| ATOM | 2911 | C2  | G B 237 | 47.347 | -22.314 | 170.890 | 0.00nan0x7fffffff |
| ATOM | 2912 | N3  | G B 237 | 46.940 | -22.871 | 172.031 | 0.00nan0x7fffffff |
| ATOM | 2913 | C4  | G B 237 | 46.072 | -22.081 | 172.693 | 0.00nan0x7fffffff |
| ATOM | 2914 | O3* | G B 237 | 48.191 | -23.595 | 177.331 | 0.00nan0x7fffffff |
| ATOM | 2915 | P   | C B 238 | 49.698 | -23.743 | 176.879 | 0.00nan0x7fffffff |
| ATOM | 2916 | O1P | C B 238 | 50.482 | -23.344 | 178.084 | 0.00nan0x7fffffff |
| ATOM | 2917 | O2P | C B 238 | 50.019 | -22.859 | 175.705 | 0.00nan0x7fffffff |
| ATOM | 2918 | O5* | C B 238 | 49.863 | -25.281 | 176.486 | 0.00nan0x7fffffff |
| ATOM | 2919 | C5* | C B 238 | 48.950 | -26.263 | 177.041 | 0.00nan0x7fffffff |
| ATOM | 2920 | C4* | C B 238 | 49.193 | -27.557 | 176.304 | 0.00nan0x7fffffff |
| ATOM | 2921 | C3* | C B 238 | 50.494 | -27.660 | 175.527 | 0.00nan0x7fffffff |
| ATOM | 2922 | O4* | C B 238 | 48.166 | -27.730 | 175.301 | 0.00nan0x7fffffff |
| ATOM | 2923 | O2* | C B 238 | 50.296 | -29.990 | 175.117 | 0.00nan0x7fffffff |
| ATOM | 2924 | C2* | C B 238 | 50.152 | -28.725 | 174.487 | 0.00nan0x7fffffff |
| ATOM | 2925 | C1* | C B 238 | 48.690 | -28.420 | 174.192 | 0.00nan0x7fffffff |
| ATOM | 2926 | N1  | C B 238 | 48.626 | -27.624 | 172.946 | 0.00nan0x7fffffff |
| ATOM | 2927 | C6  | C B 238 | 48.223 | -26.321 | 172.928 | 0.00nan0x7fffffff |
| ATOM | 2928 | C5  | C B 238 | 48.166 | -25.600 | 171.797 | 0.00nan0x7fffffff |
| ATOM | 2929 | N4  | C B 238 | 48.520 | -25.603 | 169.419 | 0.00nan0x7fffffff |
| ATOM | 2930 | C4  | C B 238 | 48.546 | -26.246 | 170.589 | 0.00nan0x7fffffff |
| ATOM | 2931 | N3  | C B 238 | 48.947 | -27.547 | 170.615 | 0.00nan0x7fffffff |
| ATOM | 2932 | O2  | C B 238 | 49.363 | -29.440 | 171.787 | 0.00nan0x7fffffff |
| ATOM | 2933 | C2  | C B 238 | 48.999 | -28.266 | 171.776 | 0.00nan0x7fffffff |
| ATOM | 2934 | O3* | C B 238 | 51.620 | -28.018 | 176.333 | 0.00nan0x7fffffff |
| ATOM | 2935 | P   | C B 239 | 53.069 | -27.364 | 176.072 | 0.00nan0x7fffffff |
| ATOM | 2936 | O1P | C B 239 | 53.748 | -27.506 | 177.387 | 0.00nan0x7fffffff |
| ATOM | 2937 | O2P | C B 239 | 52.937 | -25.930 | 175.658 | 0.00nan0x7fffffff |
| ATOM | 2938 | O5* | C B 239 | 53.690 | -28.253 | 174.906 | 0.00nan0x7fffffff |
| ATOM | 2939 | C5* | C B 239 | 53.693 | -29.699 | 175.023 | 0.00nan0x7fffffff |
| ATOM | 2940 | C4* | C B 239 | 54.147 | -30.245 | 173.691 | 0.00nan0x7fffffff |
| ATOM | 2941 | C3* | C B 239 | 55.306 | -29.523 | 173.026 | 0.00nan0x7fffffff |
| ATOM | 2942 | O4* | C B 239 | 53.064 | -30.128 | 172.740 | 0.00nan0x7fffffff |
| ATOM | 2943 | O2* | C B 239 | 55.646 | -31.184 | 171.363 | 0.00nan0x7fffffff |

|      |      |     |         |        |         |         |                   |
|------|------|-----|---------|--------|---------|---------|-------------------|
| ATOM | 2944 | C2* | C B 239 | 55.100 | -29.887 | 171.558 | 0.00nan0x7fffffff |
| ATOM | 2945 | C1* | C B 239 | 53.581 | -29.907 | 171.449 | 0.00nan0x7fffffff |
| ATOM | 2946 | N1  | C B 239 | 53.143 | -28.614 | 170.879 | 0.00nan0x7fffffff |
| ATOM | 2947 | C6  | C B 239 | 52.446 | -27.692 | 171.603 | 0.00nan0x7fffffff |
| ATOM | 2948 | C5  | C B 239 | 52.051 | -26.518 | 171.085 | 0.00nan0x7fffffff |
| ATOM | 2949 | N4  | C B 239 | 52.035 | -25.111 | 169.136 | 0.00nan0x7fffffff |
| ATOM | 2950 | C4  | C B 239 | 52.389 | -26.254 | 169.730 | 0.00nan0x7fffffff |
| ATOM | 2951 | N3  | C B 239 | 53.086 | -27.178 | 169.014 | 0.00nan0x7fffffff |
| ATOM | 2952 | O2  | C B 239 | 54.110 | -29.195 | 168.901 | 0.00nan0x7fffffff |
| ATOM | 2953 | C2  | C B 239 | 53.480 | -28.368 | 169.557 | 0.00nan0x7fffffff |
| ATOM | 2954 | O3* | C B 239 | 56.589 | -29.921 | 173.517 | 0.00nan0x7fffffff |
| ATOM | 2955 | P   | C B 240 | 57.778 | -28.845 | 173.675 | 0.00nan0x7fffffff |
| ATOM | 2956 | O1P | C B 240 | 58.246 | -29.055 | 175.070 | 0.00nan0x7fffffff |
| ATOM | 2957 | O2P | C B 240 | 57.270 | -27.454 | 173.451 | 0.00nan0x7fffffff |
| ATOM | 2958 | O5* | C B 240 | 58.829 | -29.269 | 172.553 | 0.00nan0x7fffffff |
| ATOM | 2959 | C5* | C B 240 | 59.222 | -30.660 | 172.424 | 0.00nan0x7fffffff |
| ATOM | 2960 | C4* | C B 240 | 59.967 | -30.792 | 171.119 | 0.00nan0x7fffffff |
| ATOM | 2961 | C3* | C B 240 | 60.860 | -29.628 | 170.728 | 0.00nan0x7fffffff |
| ATOM | 2962 | O4* | C B 240 | 59.012 | -30.884 | 170.037 | 0.00nan0x7fffffff |
| ATOM | 2963 | O2* | C B 240 | 61.923 | -30.783 | 168.946 | 0.00nan0x7fffffff |
| ATOM | 2964 | C2* | C B 240 | 60.942 | -29.791 | 169.212 | 0.00nan0x7fffffff |
| ATOM | 2965 | C1* | C B 240 | 59.545 | -30.295 | 168.875 | 0.00nan0x7fffffff |
| ATOM | 2966 | N1  | C B 240 | 58.741 | -29.146 | 168.402 | 0.00nan0x7fffffff |
| ATOM | 2967 | C6  | C B 240 | 57.734 | -28.601 | 169.144 | 0.00nan0x7fffffff |
| ATOM | 2968 | C5  | C B 240 | 57.004 | -27.560 | 168.713 | 0.00nan0x7fffffff |
| ATOM | 2969 | N4  | C B 240 | 56.639 | -25.993 | 166.927 | 0.00nan0x7fffffff |
| ATOM | 2970 | C4  | C B 240 | 57.315 | -27.028 | 167.432 | 0.00nan0x7fffffff |
| ATOM | 2971 | N3  | C B 240 | 58.321 | -27.578 | 166.698 | 0.00nan0x7fffffff |
| ATOM | 2972 | O2  | C B 240 | 59.960 | -29.125 | 166.480 | 0.00nan0x7fffffff |
| ATOM | 2973 | C2  | C B 240 | 59.054 | -28.637 | 167.152 | 0.00nan0x7fffffff |
| ATOM | 2974 | O3* | C B 240 | 62.145 | -29.662 | 171.356 | 0.00nan0x7fffffff |
| ATOM | 2975 | P   | A B 241 | 62.890 | -28.288 | 171.738 | 0.00nan0x7fffffff |
| ATOM | 2976 | O1P | A B 241 | 63.443 | -28.558 | 173.090 | 0.00nan0x7fffffff |
| ATOM | 2977 | O2P | A B 241 | 61.932 | -27.138 | 171.732 | 0.00nan0x7fffffff |
| ATOM | 2978 | O5* | A B 241 | 63.994 | -28.132 | 170.592 | 0.00nan0x7fffffff |
| ATOM | 2979 | C5* | A B 241 | 64.849 | -29.255 | 170.260 | 0.00nan0x7fffffff |
| ATOM | 2980 | C4* | A B 241 | 65.439 | -28.989 | 168.897 | 0.00nan0x7fffffff |
| ATOM | 2981 | C3* | A B 241 | 66.017 | -27.605 | 168.665 | 0.00nan0x7fffffff |
| ATOM | 2982 | O4* | A B 241 | 64.399 | -29.110 | 167.900 | 0.00nan0x7fffffff |
| ATOM | 2983 | O2* | A B 241 | 67.070 | -28.166 | 166.613 | 0.00nan0x7fffffff |
| ATOM | 2984 | C2* | A B 241 | 65.944 | -27.484 | 167.145 | 0.00nan0x7fffffff |
| ATOM | 2985 | C1* | A B 241 | 64.652 | -28.227 | 166.833 | 0.00nan0x7fffffff |
| ATOM | 2986 | N9  | A B 241 | 63.575 | -27.233 | 166.651 | 0.00nan0x7fffffff |
| ATOM | 2987 | C8  | A B 241 | 62.485 | -27.006 | 167.450 | 0.00nan0x7fffffff |
| ATOM | 2988 | N7  | A B 241 | 61.698 | -26.054 | 167.014 | 0.00nan0x7fffffff |
| ATOM | 2989 | C5  | A B 241 | 62.314 | -25.626 | 165.842 | 0.00nan0x7fffffff |
| ATOM | 2990 | N6  | A B 241 | 60.878 | -23.861 | 165.012 | 0.00nan0x7fffffff |
| ATOM | 2991 | C6  | A B 241 | 61.958 | -24.624 | 164.908 | 0.00nan0x7fffffff |
| ATOM | 2992 | N1  | A B 241 | 62.819 | -24.480 | 163.857 | 0.00nan0x7fffffff |
| ATOM | 2993 | C2  | A B 241 | 63.932 | -25.254 | 163.732 | 0.00nan0x7fffffff |
| ATOM | 2994 | N3  | A B 241 | 64.322 | -26.210 | 164.572 | 0.00nan0x7fffffff |
| ATOM | 2995 | C4  | A B 241 | 63.468 | -26.344 | 165.607 | 0.00nan0x7fffffff |
| ATOM | 2996 | O3* | A B 241 | 67.348 | -27.464 | 169.169 | 0.00nan0x7fffffff |
| ATOM | 2997 | P   | C B 242 | 67.867 | -26.022 | 169.647 | 0.00nan0x7fffffff |
| ATOM | 2998 | O1P | C B 242 | 68.709 | -26.325 | 170.831 | 0.00nan0x7fffffff |
| ATOM | 2999 | O2P | C B 242 | 66.725 | -25.112 | 169.970 | 0.00nan0x7fffffff |
| ATOM | 3000 | O5* | C B 242 | 68.688 | -25.492 | 168.375 | 0.00nan0x7fffffff |
| ATOM | 3001 | C5* | C B 242 | 69.818 | -26.250 | 167.874 | 0.00nan0x7fffffff |
| ATOM | 3002 | C4* | C B 242 | 70.005 | -25.893 | 166.419 | 0.00nan0x7fffffff |
| ATOM | 3003 | C3* | C B 242 | 70.392 | -24.457 | 166.118 | 0.00nan0x7fffffff |
| ATOM | 3004 | O4* | C B 242 | 68.749 | -26.076 | 165.726 | 0.00nan0x7fffffff |
| ATOM | 3005 | O2* | C B 242 | 70.898 | -24.860 | 163.833 | 0.00nan0x7fffffff |
| ATOM | 3006 | C2* | C B 242 | 69.906 | -24.297 | 164.679 | 0.00nan0x7fffffff |
| ATOM | 3007 | C1* | C B 242 | 68.638 | -25.141 | 164.679 | 0.00nan0x7fffffff |

|      |      |     |         |        |         |         |                   |
|------|------|-----|---------|--------|---------|---------|-------------------|
| ATOM | 3008 | N1  | C B 242 | 67.479 | -24.237 | 164.849 | 0.00nan0x7fffffff |
| ATOM | 3009 | C6  | C B 242 | 66.645 | -24.311 | 165.926 | 0.00nan0x7fffffff |
| ATOM | 3010 | C5  | C B 242 | 65.592 | -23.492 | 166.079 | 0.00nan0x7fffffff |
| ATOM | 3011 | N4  | C B 242 | 64.339 | -21.669 | 165.137 | 0.00nan0x7fffffff |
| ATOM | 3012 | C4  | C B 242 | 65.364 | -22.524 | 165.064 | 0.00nan0x7fffffff |
| ATOM | 3013 | N3  | C B 242 | 66.200 | -22.457 | 163.992 | 0.00nan0x7fffffff |
| ATOM | 3014 | O2  | C B 242 | 68.014 | -23.230 | 162.879 | 0.00nan0x7fffffff |
| ATOM | 3015 | C2  | C B 242 | 67.265 | -23.300 | 163.851 | 0.00nan0x7fffffff |
| ATOM | 3016 | O3* | C B 242 | 71.794 | -24.210 | 166.258 | 0.00nan0x7fffffff |
| ATOM | 3017 | P   | U B 243 | 72.313 | -22.763 | 166.727 | 0.00nan0x7fffffff |
| ATOM | 3018 | O1P | U B 243 | 73.463 | -23.075 | 167.613 | 0.00nan0x7fffffff |
| ATOM | 3019 | O2P | U B 243 | 71.234 | -22.004 | 167.434 | 0.00nan0x7fffffff |
| ATOM | 3020 | O5* | U B 243 | 72.715 | -22.052 | 165.350 | 0.00nan0x7fffffff |
| ATOM | 3021 | C5* | U B 243 | 73.870 | -22.506 | 164.599 | 0.00nan0x7fffffff |
| ATOM | 3022 | C4* | U B 243 | 73.668 | -22.102 | 163.158 | 0.00nan0x7fffffff |
| ATOM | 3023 | C3* | U B 243 | 73.620 | -20.612 | 162.873 | 0.00nan0x7fffffff |
| ATOM | 3024 | O4* | U B 243 | 72.380 | -22.588 | 162.714 | 0.00nan0x7fffffff |
| ATOM | 3025 | O2* | U B 243 | 73.735 | -20.858 | 160.515 | 0.00nan0x7fffffff |
| ATOM | 3026 | C2* | U B 243 | 72.829 | -20.567 | 161.569 | 0.00nan0x7fffffff |
| ATOM | 3027 | C1* | U B 243 | 71.832 | -21.702 | 161.767 | 0.00nan0x7fffffff |
| ATOM | 3028 | N1  | U B 243 | 70.552 | -21.113 | 162.222 | 0.00nan0x7fffffff |
| ATOM | 3029 | C6  | U B 243 | 70.031 | -21.357 | 163.458 | 0.00nan0x7fffffff |
| ATOM | 3030 | C5  | U B 243 | 68.874 | -20.816 | 163.870 | 0.00nan0x7fffffff |
| ATOM | 3031 | O4  | U B 243 | 67.086 | -19.391 | 163.238 | 0.00nan0x7fffffff |
| ATOM | 3032 | C4  | U B 243 | 68.184 | -19.959 | 162.967 | 0.00nan0x7fffffff |
| ATOM | 3033 | N3  | U B 243 | 68.718 | -19.722 | 161.734 | 0.00nan0x7fffffff |
| ATOM | 3034 | O2  | U B 243 | 70.363 | -20.055 | 160.215 | 0.00nan0x7fffffff |
| ATOM | 3035 | C2  | U B 243 | 69.897 | -20.281 | 161.329 | 0.00nan0x7fffffff |
| ATOM | 3036 | O3* | U B 243 | 74.913 | -20.011 | 162.755 | 0.00nan0x7fffffff |
| ATOM | 3037 | P   | U B 244 | 75.153 | -18.503 | 163.265 | 0.00nan0x7fffffff |
| ATOM | 3038 | O1P | U B 244 | 76.501 | -18.562 | 163.888 | 0.00nan0x7fffffff |
| ATOM | 3039 | O2P | U B 244 | 74.094 | -18.094 | 164.241 | 0.00nan0x7fffffff |
| ATOM | 3040 | O5* | U B 244 | 75.080 | -17.634 | 161.928 | 0.00nan0x7fffffff |
| ATOM | 3041 | C5* | U B 244 | 76.234 | -17.553 | 161.053 | 0.00nan0x7fffffff |
| ATOM | 3042 | C4* | U B 244 | 75.751 | -17.044 | 159.717 | 0.00nan0x7fffffff |
| ATOM | 3043 | C3* | U B 244 | 75.190 | -15.633 | 159.691 | 0.00nan0x7fffffff |
| ATOM | 3044 | O4* | U B 244 | 74.655 | -17.870 | 159.264 | 0.00nan0x7fffffff |
| ATOM | 3045 | O2* | U B 244 | 75.130 | -15.484 | 157.322 | 0.00nan0x7fffffff |
| ATOM | 3046 | C2* | U B 244 | 74.295 | -15.675 | 158.455 | 0.00nan0x7fffffff |
| ATOM | 3047 | C1* | U B 244 | 73.753 | -17.098 | 158.507 | 0.00nan0x7fffffff |
| ATOM | 3048 | N1  | U B 244 | 72.399 | -17.058 | 159.101 | 0.00nan0x7fffffff |
| ATOM | 3049 | C6  | U B 244 | 72.119 | -17.585 | 160.327 | 0.00nan0x7fffffff |
| ATOM | 3050 | C5  | U B 244 | 70.890 | -17.549 | 160.863 | 0.00nan0x7fffffff |
| ATOM | 3051 | O4  | U B 244 | 68.654 | -16.846 | 160.496 | 0.00nan0x7fffffff |
| ATOM | 3052 | C4  | U B 244 | 69.852 | -16.940 | 160.101 | 0.00nan0x7fffffff |
| ATOM | 3053 | N3  | U B 244 | 70.146 | -16.418 | 158.875 | 0.00nan0x7fffffff |
| ATOM | 3054 | O2  | U B 244 | 71.648 | -15.985 | 157.239 | 0.00nan0x7fffffff |
| ATOM | 3055 | C2  | U B 244 | 71.403 | -16.460 | 158.345 | 0.00nan0x7fffffff |
| ATOM | 3056 | O3* | U B 244 | 76.199 | -14.623 | 159.605 | 0.00nan0x7fffffff |
| ATOM | 3057 | P   | A B 245 | 76.030 | -13.213 | 160.357 | 0.00nan0x7fffffff |
| ATOM | 3058 | O1P | A B 245 | 76.627 | -13.458 | 161.694 | 0.00nan0x7fffffff |
| ATOM | 3059 | O2P | A B 245 | 74.589 | -12.815 | 160.439 | 0.00nan0x7fffffff |
| ATOM | 3060 | O5* | A B 245 | 76.860 | -12.200 | 159.438 | 0.00nan0x7fffffff |
| ATOM | 3061 | C5* | A B 245 | 78.231 | -11.854 | 159.760 | 0.00nan0x7fffffff |
| ATOM | 3062 | C4* | A B 245 | 78.902 | -11.412 | 158.482 | 0.00nan0x7fffffff |
| ATOM | 3063 | C3* | A B 245 | 78.030 | -10.667 | 157.486 | 0.00nan0x7fffffff |
| ATOM | 3064 | O4* | A B 245 | 79.342 | -12.585 | 157.759 | 0.00nan0x7fffffff |
| ATOM | 3065 | O2* | A B 245 | 79.834 | -10.005 | 156.092 | 0.00nan0x7fffffff |
| ATOM | 3066 | C2* | A B 245 | 78.759 | -10.930 | 156.171 | 0.00nan0x7fffffff |
| ATOM | 3067 | C1* | A B 245 | 79.268 | -12.351 | 156.372 | 0.00nan0x7fffffff |
| ATOM | 3068 | N9  | A B 245 | 78.339 | -13.278 | 155.693 | 0.00nan0x7fffffff |
| ATOM | 3069 | C8  | A B 245 | 77.401 | -14.101 | 156.257 | 0.00nan0x7fffffff |
| ATOM | 3070 | N7  | A B 245 | 76.729 | -14.813 | 155.387 | 0.00nan0x7fffffff |
| ATOM | 3071 | C5  | A B 245 | 77.269 | -14.432 | 154.162 | 0.00nan0x7fffffff |



|      |      |     |     |     |        |         |         |                   |
|------|------|-----|-----|-----|--------|---------|---------|-------------------|
| ATOM | 3072 | N6  | A B | 245 | 76.045 | -15.735 | 152.527 | 0.00nan0x7fffffff |
| ATOM | 3073 | C6  | A B | 245 | 76.971 | -14.840 | 152.839 | 0.00nan0x7fffffff |
| ATOM | 3074 | N1  | A B | 245 | 77.719 | -14.238 | 151.866 | 0.00nan0x7fffffff |
| ATOM | 3075 | C2  | A B | 245 | 78.676 | -13.317 | 152.166 | 0.00nan0x7fffffff |
| ATOM | 3076 | N3  | A B | 245 | 79.003 | -12.891 | 153.384 | 0.00nan0x7fffffff |
| ATOM | 3077 | C4  | A B | 245 | 78.260 | -13.489 | 154.337 | 0.00nan0x7fffffff |
| ATOM | 3078 | O3* | A B | 245 | 77.902 | -9.272  | 157.777 | 0.00nan0x7fffffff |
| ATOM | 3079 | P   | A B | 246 | 76.535 | -8.498  | 157.432 | 0.00nan0x7fffffff |
| ATOM | 3080 | O1P | A B | 246 | 76.485 | -7.416  | 158.448 | 0.00nan0x7fffffff |
| ATOM | 3081 | O2P | A B | 246 | 75.359 | -9.420  | 157.523 | 0.00nan0x7fffffff |
| ATOM | 3082 | O5* | A B | 246 | 76.759 | -7.988  | 155.935 | 0.00nan0x7fffffff |
| ATOM | 3083 | C5* | A B | 246 | 78.031 | -7.404  | 155.552 | 0.00nan0x7fffffff |
| ATOM | 3084 | C4* | A B | 246 | 78.100 | -7.427  | 154.044 | 0.00nan0x7fffffff |
| ATOM | 3085 | C3* | A B | 246 | 76.823 | -7.071  | 153.303 | 0.00nan0x7fffffff |
| ATOM | 3086 | O4* | A B | 246 | 78.400 | -8.773  | 153.608 | 0.00nan0x7fffffff |
| ATOM | 3087 | O2* | A B | 246 | 77.864 | -6.909  | 151.175 | 0.00nan0x7fffffff |
| ATOM | 3088 | C2* | A B | 246 | 77.039 | -7.760  | 151.958 | 0.00nan0x7fffffff |
| ATOM | 3089 | C1* | A B | 246 | 77.784 | -9.024  | 152.367 | 0.00nan0x7fffffff |
| ATOM | 3090 | N9  | A B | 246 | 76.816 | -10.137 | 152.428 | 0.00nan0x7fffffff |
| ATOM | 3091 | C8  | A B | 246 | 76.343 | -10.791 | 153.536 | 0.00nan0x7fffffff |
| ATOM | 3092 | N7  | A B | 246 | 75.493 | -11.749 | 153.263 | 0.00nan0x7fffffff |
| ATOM | 3093 | C5  | A B | 246 | 75.404 | -11.726 | 151.875 | 0.00nan0x7fffffff |
| ATOM | 3094 | N6  | A B | 246 | 73.835 | -13.492 | 151.337 | 0.00nan0x7fffffff |
| ATOM | 3095 | C6  | A B | 246 | 74.652 | -12.514 | 150.971 | 0.00nan0x7fffffff |
| ATOM | 3096 | N1  | A B | 246 | 74.820 | -12.200 | 149.651 | 0.00nan0x7fffffff |
| ATOM | 3097 | C2  | A B | 246 | 75.653 | -11.200 | 149.254 | 0.00nan0x7fffffff |
| ATOM | 3098 | N3  | A B | 246 | 76.386 | -10.425 | 150.050 | 0.00nan0x7fffffff |
| ATOM | 3099 | C4  | A B | 246 | 76.214 | -10.742 | 151.349 | 0.00nan0x7fffffff |
| ATOM | 3100 | O3* | A B | 246 | 76.616 | -5.662  | 153.173 | 0.00nan0x7fffffff |
| ATOM | 3101 | P   | A B | 247 | 75.132 | -5.043  | 153.227 | 0.00nan0x7fffffff |
| ATOM | 3102 | O1P | A B | 247 | 75.340 | -3.703  | 153.836 | 0.00nan0x7fffffff |
| ATOM | 3103 | O2P | A B | 247 | 74.222 | -5.905  | 154.048 | 0.00nan0x7fffffff |
| ATOM | 3104 | O5* | A B | 247 | 74.678 | -5.010  | 151.697 | 0.00nan0x7fffffff |
| ATOM | 3105 | C5* | A B | 247 | 75.657 | -4.735  | 150.660 | 0.00nan0x7fffffff |
| ATOM | 3106 | C4* | A B | 247 | 75.040 | -5.149  | 149.345 | 0.00nan0x7fffffff |
| ATOM | 3107 | C3* | A B | 247 | 73.530 | -5.024  | 149.241 | 0.00nan0x7fffffff |
| ATOM | 3108 | O4* | A B | 247 | 75.296 | -6.555  | 149.128 | 0.00nan0x7fffffff |
| ATOM | 3109 | O2* | A B | 247 | 73.460 | -5.402  | 146.898 | 0.00nan0x7fffffff |
| ATOM | 3110 | C2* | A B | 247 | 73.208 | -6.035  | 148.143 | 0.00nan0x7fffffff |
| ATOM | 3111 | C1* | A B | 247 | 74.226 | -7.134  | 148.419 | 0.00nan0x7fffffff |
| ATOM | 3112 | N9  | A B | 247 | 73.556 | -8.206  | 149.183 | 0.00nan0x7fffffff |
| ATOM | 3113 | C8  | A B | 247 | 73.686 | -8.507  | 150.514 | 0.00nan0x7fffffff |
| ATOM | 3114 | N7  | A B | 247 | 72.955 | -9.523  | 150.901 | 0.00nan0x7fffffff |
| ATOM | 3115 | C5  | A B | 247 | 72.299 | -9.918  | 149.740 | 0.00nan0x7fffffff |
| ATOM | 3116 | N6  | A B | 247 | 70.936 | -11.800 | 150.425 | 0.00nan0x7fffffff |
| ATOM | 3117 | C6  | A B | 247 | 71.369 | -10.958 | 149.497 | 0.00nan0x7fffffff |
| ATOM | 3118 | N1  | A B | 247 | 70.926 | -11.050 | 148.207 | 0.00nan0x7fffffff |
| ATOM | 3119 | C2  | A B | 247 | 71.359 | -10.195 | 147.240 | 0.00nan0x7fffffff |
| ATOM | 3120 | N3  | A B | 247 | 72.228 | -9.200  | 147.402 | 0.00nan0x7fffffff |
| ATOM | 3121 | C4  | A B | 247 | 72.659 | -9.117  | 148.677 | 0.00nan0x7fffffff |
| ATOM | 3122 | O3* | A B | 247 | 73.084 | -3.703  | 148.921 | 0.00nan0x7fffffff |
| ATOM | 3123 | P   | C B | 248 | 70.251 | -2.945  | 148.126 | 0.00nan0x7fffffff |
| ATOM | 3124 | O1P | C B | 248 | 68.982 | -2.201  | 148.347 | 0.00nan0x7fffffff |
| ATOM | 3125 | O2P | C B | 248 | 70.426 | -4.062  | 149.112 | 0.00nan0x7fffffff |
| ATOM | 3126 | O5* | C B | 248 | 70.473 | -3.444  | 146.630 | 0.00nan0x7fffffff |
| ATOM | 3127 | C5* | C B | 248 | 71.588 | -2.930  | 145.851 | 0.00nan0x7fffffff |
| ATOM | 3128 | C4* | C B | 248 | 71.374 | -3.385  | 144.428 | 0.00nan0x7fffffff |
| ATOM | 3129 | C3* | C B | 248 | 69.932 | -3.467  | 143.958 | 0.00nan0x7fffffff |
| ATOM | 3130 | O4* | C B | 248 | 71.870 | -4.735  | 144.286 | 0.00nan0x7fffffff |
| ATOM | 3131 | O2* | C B | 248 | 70.482 | -3.784  | 141.670 | 0.00nan0x7fffffff |
| ATOM | 3132 | C2* | C B | 248 | 70.029 | -4.481  | 142.821 | 0.00nan0x7fffffff |
| ATOM | 3133 | C1* | C B | 248 | 71.095 | -5.436  | 143.342 | 0.00nan0x7fffffff |
| ATOM | 3134 | N1  | C B | 248 | 70.418 | -6.611  | 143.932 | 0.00nan0x7fffffff |
| ATOM | 3135 | C6  | C B | 248 | 70.577 | -6.967  | 145.239 | 0.00nan0x7fffffff |

|      |      |     |         |        |         |         |                   |
|------|------|-----|---------|--------|---------|---------|-------------------|
| ATOM | 3136 | C5  | C B 248 | 69.963 | -8.033  | 145.776 | 0.00nan0x7fffffff |
| ATOM | 3137 | N4  | C B 248 | 68.477 | -9.879  | 145.378 | 0.00nan0x7fffffff |
| ATOM | 3138 | C4  | C B 248 | 69.124 | -8.802  | 144.924 | 0.00nan0x7fffffff |
| ATOM | 3139 | N3  | C B 248 | 68.971 | -8.443  | 143.620 | 0.00nan0x7fffffff |
| ATOM | 3140 | O2  | C B 248 | 69.458 | -7.037  | 141.913 | 0.00nan0x7fffffff |
| ATOM | 3141 | C2  | C B 248 | 69.605 | -7.355  | 143.091 | 0.00nan0x7fffffff |
| ATOM | 3142 | O3* | C B 248 | 69.394 | -2.212  | 143.532 | 0.00nan0x7fffffff |
| ATOM | 3143 | P   | C B 249 | 67.855 | -1.836  | 143.830 | 0.00nan0x7fffffff |
| ATOM | 3144 | O1P | C B 249 | 67.795 | -0.382  | 143.526 | 0.00nan0x7fffffff |
| ATOM | 3145 | O2P | C B 249 | 67.506 | -2.127  | 145.259 | 0.00nan0x7fffffff |
| ATOM | 3146 | O5* | C B 249 | 67.031 | -2.758  | 142.828 | 0.00nan0x7fffffff |
| ATOM | 3147 | C5* | C B 249 | 66.907 | -2.376  | 141.433 | 0.00nan0x7fffffff |
| ATOM | 3148 | C4* | C B 249 | 65.965 | -3.365  | 140.792 | 0.00nan0x7fffffff |
| ATOM | 3149 | C3* | C B 249 | 64.581 | -3.476  | 141.410 | 0.00nan0x7fffffff |
| ATOM | 3150 | O4* | C B 249 | 66.519 | -4.694  | 140.922 | 0.00nan0x7fffffff |
| ATOM | 3151 | O2* | C B 249 | 63.679 | -4.791  | 139.651 | 0.00nan0x7fffffff |
| ATOM | 3152 | C2* | C B 249 | 64.160 | -4.881  | 140.984 | 0.00nan0x7fffffff |
| ATOM | 3153 | C1* | C B 249 | 65.481 | -5.637  | 141.044 | 0.00nan0x7fffffff |
| ATOM | 3154 | N1  | C B 249 | 65.535 | -6.378  | 142.323 | 0.00nan0x7fffffff |
| ATOM | 3155 | C6  | C B 249 | 66.395 | -6.044  | 143.328 | 0.00nan0x7fffffff |
| ATOM | 3156 | C5  | C B 249 | 66.447 | -6.720  | 144.486 | 0.00nan0x7fffffff |
| ATOM | 3157 | N4  | C B 249 | 65.547 | -8.548  | 145.762 | 0.00nan0x7fffffff |
| ATOM | 3158 | C4  | C B 249 | 65.562 | -7.821  | 144.642 | 0.00nan0x7fffffff |
| ATOM | 3159 | N3  | C B 249 | 64.707 | -8.150  | 143.634 | 0.00nan0x7fffffff |
| ATOM | 3160 | O2  | C B 249 | 63.893 | -7.756  | 141.558 | 0.00nan0x7fffffff |
| ATOM | 3161 | C2  | C B 249 | 64.668 | -7.450  | 142.461 | 0.00nan0x7fffffff |
| ATOM | 3162 | O3* | C B 249 | 63.672 | -2.469  | 140.957 | 0.00nan0x7fffffff |
| ATOM | 3163 | P   | G B 250 | 62.585 | -1.828  | 141.956 | 0.00nan0x7fffffff |
| ATOM | 3164 | O1P | G B 250 | 62.386 | -0.459  | 141.412 | 0.00nan0x7fffffff |
| ATOM | 3165 | O2P | G B 250 | 63.099 | -1.808  | 143.363 | 0.00nan0x7fffffff |
| ATOM | 3166 | O5* | G B 250 | 61.319 | -2.786  | 141.813 | 0.00nan0x7fffffff |
| ATOM | 3167 | C5* | G B 250 | 60.815 | -3.136  | 140.498 | 0.00nan0x7fffffff |
| ATOM | 3168 | C4* | G B 250 | 59.874 | -4.302  | 140.680 | 0.00nan0x7fffffff |
| ATOM | 3169 | C3* | G B 250 | 58.917 | -4.216  | 141.857 | 0.00nan0x7fffffff |
| ATOM | 3170 | O4* | G B 250 | 60.649 | -5.494  | 140.939 | 0.00nan0x7fffffff |
| ATOM | 3171 | O2* | G B 250 | 57.602 | -6.076  | 141.186 | 0.00nan0x7fffffff |
| ATOM | 3172 | C2* | G B 250 | 58.604 | -5.688  | 142.115 | 0.00nan0x7fffffff |
| ATOM | 3173 | C1* | G B 250 | 59.937 | -6.354  | 141.797 | 0.00nan0x7fffffff |
| ATOM | 3174 | N9  | G B 250 | 60.650 | -6.601  | 143.067 | 0.00nan0x7fffffff |
| ATOM | 3175 | C8  | G B 250 | 61.786 | -5.991  | 143.531 | 0.00nan0x7fffffff |
| ATOM | 3176 | N7  | G B 250 | 62.185 | -6.436  | 144.695 | 0.00nan0x7fffffff |
| ATOM | 3177 | C5  | G B 250 | 61.246 | -7.412  | 145.019 | 0.00nan0x7fffffff |
| ATOM | 3178 | O6  | G B 250 | 61.865 | -8.307  | 147.137 | 0.00nan0x7fffffff |
| ATOM | 3179 | C6  | G B 250 | 61.124 | -8.258  | 146.153 | 0.00nan0x7fffffff |
| ATOM | 3180 | N1  | G B 250 | 60.046 | -9.106  | 146.111 | 0.00nan0x7fffffff |
| ATOM | 3181 | N2  | G B 250 | 58.175 | -10.013 | 145.184 | 0.00nan0x7fffffff |
| ATOM | 3182 | C2  | G B 250 | 59.172 | -9.127  | 145.068 | 0.00nan0x7fffffff |
| ATOM | 3183 | N3  | G B 250 | 59.240 | -8.356  | 143.983 | 0.00nan0x7fffffff |
| ATOM | 3184 | C4  | G B 250 | 60.299 | -7.524  | 144.025 | 0.00nan0x7fffffff |
| ATOM | 3185 | O3* | G B 250 | 57.744 | -3.445  | 141.583 | 0.00nan0x7fffffff |
| ATOM | 3186 | P   | U B 251 | 57.081 | -2.514  | 142.717 | 0.00nan0x7fffffff |
| ATOM | 3187 | O1P | U B 251 | 56.462 | -1.411  | 141.937 | 0.00nan0x7fffffff |
| ATOM | 3188 | O2P | U B 251 | 58.121 | -2.017  | 143.673 | 0.00nan0x7fffffff |
| ATOM | 3189 | O5* | U B 251 | 56.037 | -3.479  | 143.441 | 0.00nan0x7fffffff |
| ATOM | 3190 | C5* | U B 251 | 55.088 | -4.247  | 142.659 | 0.00nan0x7fffffff |
| ATOM | 3191 | C4* | U B 251 | 54.534 | -5.321  | 143.564 | 0.00nan0x7fffffff |
| ATOM | 3192 | C3* | U B 251 | 54.156 | -4.886  | 144.969 | 0.00nan0x7fffffff |
| ATOM | 3193 | O4* | U B 251 | 55.550 | -6.331  | 143.766 | 0.00nan0x7fffffff |
| ATOM | 3194 | O2* | U B 251 | 53.045 | -6.911  | 145.518 | 0.00nan0x7fffffff |
| ATOM | 3195 | C2* | U B 251 | 54.253 | -6.199  | 145.742 | 0.00nan0x7fffffff |
| ATOM | 3196 | C1* | U B 251 | 55.429 | -6.882  | 145.056 | 0.00nan0x7fffffff |
| ATOM | 3197 | N1  | U B 251 | 56.639 | -6.660  | 145.878 | 0.00nan0x7fffffff |
| ATOM | 3198 | C6  | U B 251 | 57.665 | -5.859  | 145.470 | 0.00nan0x7fffffff |
| ATOM | 3199 | C5  | U B 251 | 58.764 | -5.662  | 146.214 | 0.00nan0x7fffffff |

|      |      |     |     |     |        |        |         |                   |
|------|------|-----|-----|-----|--------|--------|---------|-------------------|
| ATOM | 3200 | O4  | U B | 251 | 59.824 | -6.221 | 148.262 | 0.00nan0x7fffffff |
| ATOM | 3201 | C4  | U B | 251 | 58.841 | -6.327 | 147.472 | 0.00nan0x7fffffff |
| ATOM | 3202 | N3  | U B | 251 | 57.809 | -7.127 | 147.866 | 0.00nan0x7fffffff |
| ATOM | 3203 | O2  | U B | 251 | 55.777 | -8.042 | 147.468 | 0.00nan0x7fffffff |
| ATOM | 3204 | C2  | U B | 251 | 56.697 | -7.317 | 147.096 | 0.00nan0x7fffffff |
| ATOM | 3205 | O3* | U B | 251 | 52.857 | -4.293 | 145.054 | 0.00nan0x7fffffff |
| ATOM | 3206 | P   | A B | 252 | 52.572 | -3.061 | 146.050 | 0.00nan0x7fffffff |
| ATOM | 3207 | O1P | A B | 252 | 51.505 | -2.297 | 145.353 | 0.00nan0x7fffffff |
| ATOM | 3208 | O2P | A B | 252 | 53.811 | -2.243 | 146.254 | 0.00nan0x7fffffff |
| ATOM | 3209 | O5* | A B | 252 | 52.108 | -3.762 | 147.404 | 0.00nan0x7fffffff |
| ATOM | 3210 | C5* | A B | 252 | 51.091 | -4.797 | 147.379 | 0.00nan0x7fffffff |
| ATOM | 3211 | C4* | A B | 252 | 51.146 | -5.504 | 148.712 | 0.00nan0x7fffffff |
| ATOM | 3212 | C3* | A B | 252 | 51.301 | -4.619 | 149.937 | 0.00nan0x7fffffff |
| ATOM | 3213 | O4* | A B | 252 | 52.313 | -6.358 | 148.742 | 0.00nan0x7fffffff |
| ATOM | 3214 | O2* | A B | 252 | 50.870 | -6.355 | 151.498 | 0.00nan0x7fffffff |
| ATOM | 3215 | C2* | A B | 252 | 51.925 | -5.582 | 150.943 | 0.00nan0x7fffffff |
| ATOM | 3216 | C1* | A B | 252 | 52.821 | -6.433 | 150.053 | 0.00nan0x7fffffff |
| ATOM | 3217 | N9  | A B | 252 | 54.201 | -5.917 | 150.153 | 0.00nan0x7fffffff |
| ATOM | 3218 | C8  | A B | 252 | 54.932 | -5.260 | 149.197 | 0.00nan0x7fffffff |
| ATOM | 3219 | N7  | A B | 252 | 56.139 | -4.933 | 149.586 | 0.00nan0x7fffffff |
| ATOM | 3220 | C5  | A B | 252 | 56.208 | -5.413 | 150.890 | 0.00nan0x7fffffff |
| ATOM | 3221 | N6  | A B | 252 | 58.435 | -4.822 | 151.637 | 0.00nan0x7fffffff |
| ATOM | 3222 | C6  | A B | 252 | 57.248 | -5.374 | 151.849 | 0.00nan0x7fffffff |
| ATOM | 3223 | N1  | A B | 252 | 56.951 | -5.958 | 153.049 | 0.00nan0x7fffffff |
| ATOM | 3224 | C2  | A B | 252 | 55.739 | -6.530 | 153.286 | 0.00nan0x7fffffff |
| ATOM | 3225 | N3  | A B | 252 | 54.722 | -6.600 | 152.430 | 0.00nan0x7fffffff |
| ATOM | 3226 | C4  | A B | 252 | 55.024 | -6.022 | 151.250 | 0.00nan0x7fffffff |
| ATOM | 3227 | O3* | A B | 252 | 50.066 | -4.063 | 150.399 | 0.00nan0x7fffffff |
| ATOM | 3228 | P   | U B | 253 | 50.004 | -2.573 | 151.003 | 0.00nan0x7fffffff |
| ATOM | 3229 | O1P | U B | 253 | 48.636 | -2.116 | 150.647 | 0.00nan0x7fffffff |
| ATOM | 3230 | O2P | U B | 253 | 51.066 | -1.707 | 150.397 | 0.00nan0x7fffffff |
| ATOM | 3231 | O5* | U B | 253 | 50.246 | -2.783 | 152.565 | 0.00nan0x7fffffff |
| ATOM | 3232 | C5* | U B | 253 | 49.489 | -3.784 | 153.293 | 0.00nan0x7fffffff |
| ATOM | 3233 | C4* | U B | 253 | 50.201 | -4.010 | 154.606 | 0.00nan0x7fffffff |
| ATOM | 3234 | C3* | U B | 253 | 50.691 | -2.766 | 155.327 | 0.00nan0x7fffffff |
| ATOM | 3235 | O4* | U B | 253 | 51.402 | -4.776 | 154.361 | 0.00nan0x7fffffff |
| ATOM | 3236 | O2* | U B | 253 | 51.233 | -3.900 | 157.341 | 0.00nan0x7fffffff |
| ATOM | 3237 | C2* | U B | 253 | 51.824 | -3.327 | 156.184 | 0.00nan0x7fffffff |
| ATOM | 3238 | C1* | U B | 253 | 52.406 | -4.401 | 155.274 | 0.00nan0x7fffffff |
| ATOM | 3239 | N1  | U B | 253 | 53.600 | -3.843 | 154.602 | 0.00nan0x7fffffff |
| ATOM | 3240 | C6  | U B | 253 | 53.628 | -3.569 | 153.266 | 0.00nan0x7fffffff |
| ATOM | 3241 | C5  | U B | 253 | 54.713 | -3.068 | 152.657 | 0.00nan0x7fffffff |
| ATOM | 3242 | O4  | U B | 253 | 56.950 | -2.354 | 152.997 | 0.00nan0x7fffffff |
| ATOM | 3243 | C4  | U B | 253 | 55.868 | -2.824 | 153.455 | 0.00nan0x7fffffff |
| ATOM | 3244 | N3  | U B | 253 | 55.826 | -3.105 | 154.789 | 0.00nan0x7fffffff |
| ATOM | 3245 | O2  | U B | 253 | 54.695 | -3.862 | 156.598 | 0.00nan0x7fffffff |
| ATOM | 3246 | C2  | U B | 253 | 54.714 | -3.615 | 155.394 | 0.00nan0x7fffffff |
| ATOM | 3247 | O3* | U B | 253 | 49.680 | -2.121 | 156.106 | 0.00nan0x7fffffff |
| ATOM | 3248 | P   | A B | 254 | 49.619 | -0.517 | 156.218 | 0.00nan0x7fffffff |
| ATOM | 3249 | O1P | A B | 254 | 48.171 | -0.242 | 156.408 | 0.00nan0x7fffffff |
| ATOM | 3250 | O2P | A B | 254 | 50.158 | 0.125  | 154.976 | 0.00nan0x7fffffff |
| ATOM | 3251 | O5* | A B | 254 | 50.527 | -0.185 | 157.486 | 0.00nan0x7fffffff |
| ATOM | 3252 | C5* | A B | 254 | 50.358 | -0.929 | 158.720 | 0.00nan0x7fffffff |
| ATOM | 3253 | C4* | A B | 254 | 51.575 | -0.657 | 159.571 | 0.00nan0x7fffffff |
| ATOM | 3254 | C3* | A B | 254 | 52.075 | 0.777  | 159.591 | 0.00nan0x7fffffff |
| ATOM | 3255 | O4* | A B | 254 | 52.690 | -1.414 | 159.048 | 0.00nan0x7fffffff |
| ATOM | 3256 | O2* | A B | 254 | 53.602 | 0.437  | 161.377 | 0.00nan0x7fffffff |
| ATOM | 3257 | C2* | A B | 254 | 53.543 | 0.593  | 159.967 | 0.00nan0x7fffffff |
| ATOM | 3258 | C1* | A B | 254 | 53.891 | -0.707 | 159.254 | 0.00nan0x7fffffff |
| ATOM | 3259 | N9  | A B | 254 | 54.575 | -0.377 | 157.987 | 0.00nan0x7fffffff |
| ATOM | 3260 | C8  | A B | 254 | 54.107 | -0.525 | 156.707 | 0.00nan0x7fffffff |
| ATOM | 3261 | N7  | A B | 254 | 54.958 | -0.149 | 155.786 | 0.00nan0x7fffffff |
| ATOM | 3262 | C5  | A B | 254 | 56.068 | 0.272  | 156.513 | 0.00nan0x7fffffff |
| ATOM | 3263 | N6  | A B | 254 | 57.664 | 0.974  | 154.831 | 0.00nan0x7fffffff |

|      |      |     |     |     |        |        |         |                   |
|------|------|-----|-----|-----|--------|--------|---------|-------------------|
| ATOM | 3264 | C6  | A B | 254 | 57.318 | 0.790  | 156.098 | 0.00nan0x7fffffff |
| ATOM | 3265 | N1  | A B | 254 | 58.180 | 1.102  | 157.112 | 0.00nan0x7fffffff |
| ATOM | 3266 | C2  | A B | 254 | 57.844 | 0.920  | 158.418 | 0.00nan0x7fffffff |
| ATOM | 3267 | N3  | A B | 254 | 56.689 | 0.438  | 158.873 | 0.00nan0x7fffffff |
| ATOM | 3268 | C4  | A B | 254 | 55.846 | 0.135  | 157.867 | 0.00nan0x7fffffff |
| ATOM | 3269 | O3* | A B | 254 | 51.371 | 1.612  | 160.515 | 0.00nan0x7fffffff |
| ATOM | 3270 | P   | G B | 255 | 51.068 | 3.155  | 160.171 | 0.00nan0x7fffffff |
| ATOM | 3271 | O1P | G B | 255 | 49.779 | 3.414  | 160.862 | 0.00nan0x7fffffff |
| ATOM | 3272 | O2P | G B | 255 | 50.969 | 3.362  | 158.691 | 0.00nan0x7fffffff |
| ATOM | 3273 | O5* | G B | 255 | 52.316 | 3.935  | 160.786 | 0.00nan0x7fffffff |
| ATOM | 3274 | C5* | G B | 255 | 52.809 | 3.597  | 162.107 | 0.00nan0x7fffffff |
| ATOM | 3275 | C4* | G B | 255 | 54.188 | 4.198  | 162.234 | 0.00nan0x7fffffff |
| ATOM | 3276 | C3* | G B | 255 | 54.382 | 5.571  | 161.613 | 0.00nan0x7fffffff |
| ATOM | 3277 | O4* | G B | 255 | 55.132 | 3.356  | 161.534 | 0.00nan0x7fffffff |
| ATOM | 3278 | O2* | G B | 255 | 56.515 | 5.933  | 162.590 | 0.00nan0x7fffffff |
| ATOM | 3279 | C2* | G B | 255 | 55.888 | 5.592  | 161.362 | 0.00nan0x7fffffff |
| ATOM | 3280 | C1* | G B | 255 | 56.165 | 4.142  | 160.987 | 0.00nan0x7fffffff |
| ATOM | 3281 | N9  | G B | 255 | 56.222 | 4.049  | 159.513 | 0.00nan0x7fffffff |
| ATOM | 3282 | C8  | G B | 255 | 55.315 | 3.464  | 158.668 | 0.00nan0x7fffffff |
| ATOM | 3283 | N7  | G B | 255 | 55.645 | 3.543  | 157.404 | 0.00nan0x7fffffff |
| ATOM | 3284 | C5  | G B | 255 | 56.857 | 4.229  | 157.419 | 0.00nan0x7fffffff |
| ATOM | 3285 | O6  | G B | 255 | 57.571 | 4.440  | 155.157 | 0.00nan0x7fffffff |
| ATOM | 3286 | C6  | G B | 255 | 57.722 | 4.629  | 156.367 | 0.00nan0x7fffffff |
| ATOM | 3287 | N1  | G B | 255 | 58.844 | 5.299  | 156.783 | 0.00nan0x7fffffff |
| ATOM | 3288 | N2  | G B | 255 | 60.238 | 6.219  | 158.331 | 0.00nan0x7fffffff |
| ATOM | 3289 | C2  | G B | 255 | 59.099 | 5.555  | 158.095 | 0.00nan0x7fffffff |
| ATOM | 3290 | N3  | G B | 255 | 58.323 | 5.203  | 159.119 | 0.00nan0x7fffffff |
| ATOM | 3291 | C4  | G B | 255 | 57.221 | 4.545  | 158.710 | 0.00nan0x7fffffff |
| ATOM | 3292 | O3* | G B | 255 | 53.948 | 6.645  | 162.452 | 0.00nan0x7fffffff |
| ATOM | 3293 | P   | C B | 256 | 53.257 | 7.954  | 161.818 | 0.00nan0x7fffffff |
| ATOM | 3294 | O1P | C B | 256 | 52.396 | 8.455  | 162.921 | 0.00nan0x7fffffff |
| ATOM | 3295 | O2P | C B | 256 | 52.465 | 7.600  | 160.597 | 0.00nan0x7fffffff |
| ATOM | 3296 | O5* | C B | 256 | 54.490 | 8.900  | 161.459 | 0.00nan0x7fffffff |
| ATOM | 3297 | C5* | C B | 256 | 55.458 | 9.250  | 162.482 | 0.00nan0x7fffffff |
| ATOM | 3298 | C4* | C B | 256 | 56.671 | 9.805  | 161.776 | 0.00nan0x7fffffff |
| ATOM | 3299 | C3* | C B | 256 | 56.411 | 10.863 | 160.718 | 0.00nan0x7fffffff |
| ATOM | 3300 | O4* | C B | 256 | 57.325 | 8.735  | 161.055 | 0.00nan0x7fffffff |
| ATOM | 3301 | O2* | C B | 256 | 58.695 | 11.468 | 160.475 | 0.00nan0x7fffffff |
| ATOM | 3302 | C2* | C B | 256 | 57.654 | 10.739 | 159.840 | 0.00nan0x7fffffff |
| ATOM | 3303 | C1* | C B | 256 | 57.924 | 9.241  | 159.885 | 0.00nan0x7fffffff |
| ATOM | 3304 | N1  | C B | 256 | 57.369 | 8.634  | 158.656 | 0.00nan0x7fffffff |
| ATOM | 3305 | C6  | C B | 256 | 56.298 | 7.789  | 158.675 | 0.00nan0x7fffffff |
| ATOM | 3306 | C5  | C B | 256 | 55.796 | 7.237  | 157.559 | 0.00nan0x7fffffff |
| ATOM | 3307 | N4  | C B | 256 | 55.993 | 7.057  | 155.169 | 0.00nan0x7fffffff |
| ATOM | 3308 | C4  | C B | 256 | 56.427 | 7.562  | 156.327 | 0.00nan0x7fffffff |
| ATOM | 3309 | N3  | C B | 256 | 57.496 | 8.406  | 156.317 | 0.00nan0x7fffffff |
| ATOM | 3310 | O2  | C B | 256 | 58.959 | 9.719  | 157.441 | 0.00nan0x7fffffff |
| ATOM | 3311 | C2  | C B | 256 | 57.993 | 8.959  | 157.462 | 0.00nan0x7fffffff |
| ATOM | 3312 | O3* | C B | 256 | 56.247 | 12.179 | 161.255 | 0.00nan0x7fffffff |
| ATOM | 3313 | P   | C B | 257 | 55.202 | 13.213 | 160.600 | 0.00nan0x7fffffff |
| ATOM | 3314 | O1P | C B | 257 | 54.098 | 13.262 | 161.593 | 0.00nan0x7fffffff |
| ATOM | 3315 | O2P | C B | 257 | 54.740 | 12.729 | 159.260 | 0.00nan0x7fffffff |
| ATOM | 3316 | O5* | C B | 257 | 56.038 | 14.567 | 160.473 | 0.00nan0x7fffffff |
| ATOM | 3317 | C5* | C B | 257 | 56.762 | 15.082 | 161.620 | 0.00nan0x7fffffff |
| ATOM | 3318 | C4* | C B | 257 | 57.746 | 16.104 | 161.105 | 0.00nan0x7fffffff |
| ATOM | 3319 | C3* | C B | 257 | 57.240 | 17.045 | 160.026 | 0.00nan0x7fffffff |
| ATOM | 3320 | O4* | C B | 257 | 58.856 | 15.416 | 160.484 | 0.00nan0x7fffffff |
| ATOM | 3321 | O2* | C B | 257 | 59.117 | 18.496 | 160.129 | 0.00nan0x7fffffff |
| ATOM | 3322 | C2* | C B | 257 | 58.540 | 17.464 | 159.342 | 0.00nan0x7fffffff |
| ATOM | 3323 | C1* | C B | 257 | 59.363 | 16.186 | 159.420 | 0.00nan0x7fffffff |
| ATOM | 3324 | N1  | C B | 257 | 59.262 | 15.490 | 158.119 | 0.00nan0x7fffffff |
| ATOM | 3325 | C6  | C B | 257 | 58.579 | 14.319 | 157.964 | 0.00nan0x7fffffff |
| ATOM | 3326 | C5  | C B | 257 | 58.490 | 13.687 | 156.783 | 0.00nan0x7fffffff |
| ATOM | 3327 | N4  | C B | 257 | 59.106 | 13.722 | 154.460 | 0.00nan0x7fffffff |

|      |      |     |         |        |        |         |                   |
|------|------|-----|---------|--------|--------|---------|-------------------|
| ATOM | 3328 | C4  | C B 257 | 59.144 | 14.284 | 155.671 | 0.00nan0x7fffffff |
| ATOM | 3329 | N3  | C B 257 | 59.824 | 15.452 | 155.833 | 0.00nan0x7fffffff |
| ATOM | 3330 | O2  | C B 257 | 60.522 | 17.136 | 157.177 | 0.00nan0x7fffffff |
| ATOM | 3331 | C2  | C B 257 | 59.904 | 16.082 | 157.043 | 0.00nan0x7fffffff |
| ATOM | 3332 | O3* | C B 257 | 56.504 | 18.159 | 160.538 | 0.00nan0x7fffffff |
| ATOM | 3333 | P   | A B 258 | 55.240 | 18.749 | 159.736 | 0.00nan0x7fffffff |
| ATOM | 3334 | O1P | A B 258 | 54.178 | 18.823 | 160.773 | 0.00nan0x7fffffff |
| ATOM | 3335 | O2P | A B 258 | 54.861 | 17.848 | 158.600 | 0.00nan0x7fffffff |
| ATOM | 3336 | O5* | A B 258 | 55.750 | 20.166 | 159.209 | 0.00nan0x7fffffff |
| ATOM | 3337 | C5* | A B 258 | 56.246 | 21.155 | 160.147 | 0.00nan0x7fffffff |
| ATOM | 3338 | C4* | A B 258 | 57.008 | 22.185 | 159.349 | 0.00nan0x7fffffff |
| ATOM | 3339 | C3* | A B 258 | 56.379 | 22.625 | 158.039 | 0.00nan0x7fffffff |
| ATOM | 3340 | O4* | A B 258 | 58.284 | 21.627 | 158.961 | 0.00nan0x7fffffff |
| ATOM | 3341 | O2* | A B 258 | 57.869 | 24.441 | 157.700 | 0.00nan0x7fffffff |
| ATOM | 3342 | C2* | A B 258 | 57.594 | 23.119 | 157.259 | 0.00nan0x7fffffff |
| ATOM | 3343 | C1* | A B 258 | 58.677 | 22.150 | 157.714 | 0.00nan0x7fffffff |
| ATOM | 3344 | N9  | A B 258 | 58.826 | 21.103 | 156.682 | 0.00nan0x7fffffff |
| ATOM | 3345 | C8  | A B 258 | 58.470 | 19.782 | 156.757 | 0.00nan0x7fffffff |
| ATOM | 3346 | N7  | A B 258 | 58.734 | 19.100 | 155.671 | 0.00nan0x7fffffff |
| ATOM | 3347 | C5  | A B 258 | 59.306 | 20.041 | 154.821 | 0.00nan0x7fffffff |
| ATOM | 3348 | N6  | A B 258 | 59.807 | 18.807 | 152.797 | 0.00nan0x7fffffff |
| ATOM | 3349 | C6  | A B 258 | 59.805 | 19.931 | 153.501 | 0.00nan0x7fffffff |
| ATOM | 3350 | N1  | A B 258 | 60.303 | 21.089 | 152.971 | 0.00nan0x7fffffff |
| ATOM | 3351 | C2  | A B 258 | 60.310 | 22.253 | 153.676 | 0.00nan0x7fffffff |
| ATOM | 3352 | N3  | A B 258 | 59.857 | 22.423 | 154.917 | 0.00nan0x7fffffff |
| ATOM | 3353 | C4  | A B 258 | 59.369 | 21.276 | 155.430 | 0.00nan0x7fffffff |
| ATOM | 3354 | O3* | A B 258 | 55.378 | 23.634 | 158.196 | 0.00nan0x7fffffff |
| ATOM | 3355 | P   | A B 259 | 54.066 | 23.649 | 157.264 | 0.00nan0x7fffffff |
| ATOM | 3356 | O1P | A B 259 | 52.952 | 23.765 | 158.241 | 0.00nan0x7fffffff |
| ATOM | 3357 | O2P | A B 259 | 53.976 | 22.394 | 156.450 | 0.00nan0x7fffffff |
| ATOM | 3358 | O5* | A B 259 | 54.270 | 24.930 | 156.337 | 0.00nan0x7fffffff |
| ATOM | 3359 | C5* | A B 259 | 54.398 | 26.246 | 156.934 | 0.00nan0x7fffffff |
| ATOM | 3360 | C4* | A B 259 | 54.945 | 27.166 | 155.869 | 0.00nan0x7fffffff |
| ATOM | 3361 | C3* | A B 259 | 54.299 | 27.069 | 154.498 | 0.00nan0x7fffffff |
| ATOM | 3362 | O4* | A B 259 | 56.333 | 26.837 | 155.631 | 0.00nan0x7fffffff |
| ATOM | 3363 | O2* | A B 259 | 55.351 | 29.018 | 153.644 | 0.00nan0x7fffffff |
| ATOM | 3364 | C2* | A B 259 | 55.407 | 27.601 | 153.592 | 0.00nan0x7fffffff |
| ATOM | 3365 | C1* | A B 259 | 56.658 | 27.073 | 154.282 | 0.00nan0x7fffffff |
| ATOM | 3366 | N9  | A B 259 | 57.091 | 25.847 | 153.581 | 0.00nan0x7fffffff |
| ATOM | 3367 | C8  | A B 259 | 57.074 | 24.556 | 154.042 | 0.00nan0x7fffffff |
| ATOM | 3368 | N7  | A B 259 | 57.525 | 23.680 | 153.179 | 0.00nan0x7fffffff |
| ATOM | 3369 | C5  | A B 259 | 57.862 | 24.451 | 152.071 | 0.00nan0x7fffffff |
| ATOM | 3370 | N6  | A B 259 | 58.701 | 22.855 | 150.453 | 0.00nan0x7fffffff |
| ATOM | 3371 | C6  | A B 259 | 58.402 | 24.096 | 150.812 | 0.00nan0x7fffffff |
| ATOM | 3372 | N1  | A B 259 | 58.606 | 25.141 | 149.954 | 0.00nan0x7fffffff |
| ATOM | 3373 | C2  | A B 259 | 58.306 | 26.422 | 150.302 | 0.00nan0x7fffffff |
| ATOM | 3374 | N3  | A B 259 | 57.798 | 26.822 | 151.466 | 0.00nan0x7fffffff |
| ATOM | 3375 | C4  | A B 259 | 57.600 | 25.785 | 152.305 | 0.00nan0x7fffffff |
| ATOM | 3376 | O3* | A B 259 | 53.086 | 27.817 | 154.380 | 0.00nan0x7fffffff |
| ATOM | 3377 | P   | C B 260 | 51.848 | 27.255 | 153.516 | 0.00nan0x7fffffff |
| ATOM | 3378 | O1P | C B 260 | 50.746 | 27.176 | 154.511 | 0.00nan0x7fffffff |
| ATOM | 3379 | O2P | C B 260 | 52.175 | 25.915 | 152.930 | 0.00nan0x7fffffff |
| ATOM | 3380 | O5* | C B 260 | 51.638 | 28.352 | 152.381 | 0.00nan0x7fffffff |
| ATOM | 3381 | C5* | C B 260 | 50.857 | 29.542 | 152.660 | 0.00nan0x7fffffff |
| ATOM | 3382 | C4* | C B 260 | 51.070 | 30.490 | 151.506 | 0.00nan0x7fffffff |
| ATOM | 3383 | C3* | C B 260 | 51.182 | 29.861 | 150.128 | 0.00nan0x7fffffff |
| ATOM | 3384 | O4* | C B 260 | 52.331 | 31.176 | 151.687 | 0.00nan0x7fffffff |
| ATOM | 3385 | O2* | C B 260 | 51.041 | 31.921 | 148.955 | 0.00nan0x7fffffff |
| ATOM | 3386 | C2* | C B 260 | 51.967 | 30.924 | 149.362 | 0.00nan0x7fffffff |
| ATOM | 3387 | C1* | C B 260 | 52.910 | 31.453 | 150.434 | 0.00nan0x7fffffff |
| ATOM | 3388 | N1  | C B 260 | 54.224 | 30.795 | 150.260 | 0.00nan0x7fffffff |
| ATOM | 3389 | C6  | C B 260 | 54.698 | 29.861 | 151.134 | 0.00nan0x7fffffff |
| ATOM | 3390 | C5  | C B 260 | 55.891 | 29.267 | 150.977 | 0.00nan0x7fffffff |
| ATOM | 3391 | N4  | C B 260 | 57.867 | 29.106 | 149.616 | 0.00nan0x7fffffff |

|      |      |     |         |        |        |         |                   |
|------|------|-----|---------|--------|--------|---------|-------------------|
| ATOM | 3392 | C4  | C B 260 | 56.668 | 29.647 | 149.849 | 0.00nan0x7fffffff |
| ATOM | 3393 | N3  | C B 260 | 56.189 | 30.581 | 148.982 | 0.00nan0x7fffffff |
| ATOM | 3394 | O2  | C B 260 | 54.550 | 32.018 | 148.368 | 0.00nan0x7fffffff |
| ATOM | 3395 | C2  | C B 260 | 54.972 | 31.176 | 149.158 | 0.00nan0x7fffffff |
| ATOM | 3396 | O3* | C B 260 | 49.918 | 29.571 | 149.526 | 0.00nan0x7fffffff |
| ATOM | 3397 | P   | A B 261 | 49.717 | 28.251 | 148.625 | 0.00nan0x7fffffff |
| ATOM | 3398 | O1P | A B 261 | 48.265 | 27.966 | 148.756 | 0.00nan0x7fffffff |
| ATOM | 3399 | O2P | A B 261 | 50.562 | 27.125 | 149.137 | 0.00nan0x7fffffff |
| ATOM | 3400 | O5* | A B 261 | 50.174 | 28.707 | 147.168 | 0.00nan0x7fffffff |
| ATOM | 3401 | C5* | A B 261 | 49.629 | 29.918 | 146.583 | 0.00nan0x7fffffff |
| ATOM | 3402 | C4* | A B 261 | 50.474 | 30.244 | 145.375 | 0.00nan0x7fffffff |
| ATOM | 3403 | C3* | A B 261 | 50.909 | 29.067 | 144.520 | 0.00nan0x7fffffff |
| ATOM | 3404 | O4* | A B 261 | 51.715 | 30.840 | 145.817 | 0.00nan0x7fffffff |
| ATOM | 3405 | O2* | A B 261 | 51.725 | 30.405 | 142.736 | 0.00nan0x7fffffff |
| ATOM | 3406 | C2* | A B 261 | 52.158 | 29.621 | 143.838 | 0.00nan0x7fffffff |
| ATOM | 3407 | C1* | A B 261 | 52.756 | 30.493 | 144.934 | 0.00nan0x7fffffff |
| ATOM | 3408 | N9  | A B 261 | 53.833 | 29.732 | 145.599 | 0.00nan0x7fffffff |
| ATOM | 3409 | C8  | A B 261 | 53.840 | 29.199 | 146.862 | 0.00nan0x7fffffff |
| ATOM | 3410 | N7  | A B 261 | 54.952 | 28.579 | 147.169 | 0.00nan0x7fffffff |
| ATOM | 3411 | C5  | A B 261 | 55.733 | 28.717 | 146.026 | 0.00nan0x7fffffff |
| ATOM | 3412 | N6  | A B 261 | 57.802 | 27.577 | 146.564 | 0.00nan0x7fffffff |
| ATOM | 3413 | C6  | A B 261 | 57.041 | 28.267 | 145.725 | 0.00nan0x7fffffff |
| ATOM | 3414 | N1  | A B 261 | 57.494 | 28.595 | 144.477 | 0.00nan0x7fffffff |
| ATOM | 3415 | C2  | A B 261 | 56.728 | 29.302 | 143.602 | 0.00nan0x7fffffff |
| ATOM | 3416 | N3  | A B 261 | 55.495 | 29.752 | 143.822 | 0.00nan0x7fffffff |
| ATOM | 3417 | C4  | A B 261 | 55.058 | 29.425 | 145.054 | 0.00nan0x7fffffff |
| ATOM | 3418 | O3* | A B 261 | 49.915 | 28.641 | 143.584 | 0.00nan0x7fffffff |
| ATOM | 3419 | P   | A B 262 | 49.728 | 27.081 | 143.234 | 0.00nan0x7fffffff |
| ATOM | 3420 | O1P | A B 262 | 48.297 | 26.987 | 142.841 | 0.00nan0x7fffffff |
| ATOM | 3421 | O2P | A B 262 | 50.046 | 26.226 | 144.421 | 0.00nan0x7fffffff |
| ATOM | 3422 | O5* | A B 262 | 50.758 | 26.831 | 142.042 | 0.00nan0x7fffffff |
| ATOM | 3423 | C5* | A B 262 | 50.686 | 27.636 | 140.837 | 0.00nan0x7fffffff |
| ATOM | 3424 | C4* | A B 262 | 51.984 | 27.438 | 140.092 | 0.00nan0x7fffffff |
| ATOM | 3425 | C3* | A B 262 | 52.481 | 26.007 | 139.975 | 0.00nan0x7fffffff |
| ATOM | 3426 | O4* | A B 262 | 53.041 | 28.124 | 140.800 | 0.00nan0x7fffffff |
| ATOM | 3427 | O2* | A B 262 | 54.177 | 26.515 | 138.392 | 0.00nan0x7fffffff |
| ATOM | 3428 | C2* | A B 262 | 53.980 | 26.214 | 139.766 | 0.00nan0x7fffffff |
| ATOM | 3429 | C1* | A B 262 | 54.256 | 27.429 | 140.641 | 0.00nan0x7fffffff |
| ATOM | 3430 | N9  | A B 262 | 54.810 | 26.959 | 141.928 | 0.00nan0x7fffffff |
| ATOM | 3431 | C8  | A B 262 | 54.225 | 26.994 | 143.166 | 0.00nan0x7fffffff |
| ATOM | 3432 | N7  | A B 262 | 54.974 | 26.500 | 144.120 | 0.00nan0x7fffffff |
| ATOM | 3433 | C5  | A B 262 | 56.136 | 26.112 | 143.459 | 0.00nan0x7fffffff |
| ATOM | 3434 | N6  | A B 262 | 57.546 | 25.192 | 145.201 | 0.00nan0x7fffffff |
| ATOM | 3435 | C6  | A B 262 | 57.327 | 25.511 | 143.933 | 0.00nan0x7fffffff |
| ATOM | 3436 | N1  | A B 262 | 58.273 | 25.270 | 142.977 | 0.00nan0x7fffffff |
| ATOM | 3437 | C2  | A B 262 | 58.069 | 25.591 | 141.670 | 0.00nan0x7fffffff |
| ATOM | 3438 | N3  | A B 262 | 56.975 | 26.155 | 141.161 | 0.00nan0x7fffffff |
| ATOM | 3439 | C4  | A B 262 | 56.048 | 26.390 | 142.112 | 0.00nan0x7fffffff |
| ATOM | 3440 | O3* | A B 262 | 51.873 | 25.275 | 138.907 | 0.00nan0x7fffffff |
| ATOM | 3441 | P   | U B 263 | 51.532 | 23.710 | 139.071 | 0.00nan0x7fffffff |
| ATOM | 3442 | O1P | U B 263 | 50.111 | 23.623 | 138.642 | 0.00nan0x7fffffff |
| ATOM | 3443 | O2P | U B 263 | 51.722 | 23.269 | 140.490 | 0.00nan0x7fffffff |
| ATOM | 3444 | O5* | U B 263 | 52.564 | 22.989 | 138.093 | 0.00nan0x7fffffff |
| ATOM | 3445 | C5* | U B 263 | 52.566 | 23.306 | 136.677 | 0.00nan0x7fffffff |
| ATOM | 3446 | C4* | U B 263 | 53.849 | 22.758 | 136.101 | 0.00nan0x7fffffff |
| ATOM | 3447 | C3* | U B 263 | 54.256 | 21.369 | 136.562 | 0.00nan0x7fffffff |
| ATOM | 3448 | O4* | U B 263 | 54.947 | 23.604 | 136.513 | 0.00nan0x7fffffff |
| ATOM | 3449 | O2* | U B 263 | 55.980 | 21.121 | 134.948 | 0.00nan0x7fffffff |
| ATOM | 3450 | C2* | U B 263 | 55.764 | 21.391 | 136.326 | 0.00nan0x7fffffff |
| ATOM | 3451 | C1* | U B 263 | 56.115 | 22.833 | 136.667 | 0.00nan0x7fffffff |
| ATOM | 3452 | N1  | U B 263 | 56.636 | 22.865 | 138.051 | 0.00nan0x7fffffff |
| ATOM | 3453 | C6  | U B 263 | 55.943 | 23.427 | 139.083 | 0.00nan0x7fffffff |
| ATOM | 3454 | C5  | U B 263 | 56.417 | 23.455 | 140.338 | 0.00nan0x7fffffff |
| ATOM | 3455 | O4  | U B 263 | 58.244 | 22.830 | 141.715 | 0.00nan0x7fffffff |

|      |      |     |     |     |        |        |         |                   |
|------|------|-----|-----|-----|--------|--------|---------|-------------------|
| ATOM | 3456 | C4  | U B | 263 | 57.692 | 22.867 | 140.578 | 0.00nan0x7fffffff |
| ATOM | 3457 | N3  | U B | 263 | 58.374 | 22.308 | 139.537 | 0.00nan0x7fffffff |
| ATOM | 3458 | O2  | U B | 263 | 58.506 | 21.779 | 137.340 | 0.00nan0x7fffffff |
| ATOM | 3459 | C2  | U B | 263 | 57.878 | 22.289 | 138.265 | 0.00nan0x7fffffff |
| ATOM | 3460 | O3* | U B | 263 | 53.603 | 20.313 | 135.850 | 0.00nan0x7fffffff |
| ATOM | 3461 | P   | U B | 264 | 53.155 | 18.963 | 136.606 | 0.00nan0x7fffffff |
| ATOM | 3462 | O1P | U B | 264 | 51.835 | 18.654 | 135.996 | 0.00nan0x7fffffff |
| ATOM | 3463 | O2P | U B | 264 | 53.055 | 19.190 | 138.084 | 0.00nan0x7fffffff |
| ATOM | 3464 | O5* | U B | 264 | 54.308 | 17.923 | 136.252 | 0.00nan0x7fffffff |
| ATOM | 3465 | C5* | U B | 264 | 54.343 | 17.299 | 134.943 | 0.00nan0x7fffffff |
| ATOM | 3466 | C4* | U B | 264 | 55.670 | 16.591 | 134.827 | 0.00nan0x7fffffff |
| ATOM | 3467 | C3* | U B | 264 | 56.018 | 15.620 | 135.941 | 0.00nan0x7fffffff |
| ATOM | 3468 | O4* | U B | 264 | 56.732 | 17.572 | 134.867 | 0.00nan0x7fffffff |
| ATOM | 3469 | O2* | U B | 264 | 57.885 | 14.684 | 134.811 | 0.00nan0x7fffffff |
| ATOM | 3470 | C2* | U B | 264 | 57.542 | 15.582 | 135.857 | 0.00nan0x7fffffff |
| ATOM | 3471 | C1* | U B | 264 | 57.873 | 17.019 | 135.480 | 0.00nan0x7fffffff |
| ATOM | 3472 | N1  | U B | 264 | 58.258 | 17.741 | 136.713 | 0.00nan0x7fffffff |
| ATOM | 3473 | C6  | U B | 264 | 57.468 | 18.695 | 137.282 | 0.00nan0x7fffffff |
| ATOM | 3474 | C5  | U B | 264 | 57.818 | 19.345 | 138.403 | 0.00nan0x7fffffff |
| ATOM | 3475 | O4  | U B | 264 | 59.505 | 19.550 | 140.057 | 0.00nan0x7fffffff |
| ATOM | 3476 | C4  | U B | 264 | 59.065 | 19.008 | 139.002 | 0.00nan0x7fffffff |
| ATOM | 3477 | N3  | U B | 264 | 59.845 | 18.051 | 138.422 | 0.00nan0x7fffffff |
| ATOM | 3478 | O2  | U B | 264 | 60.191 | 16.539 | 136.774 | 0.00nan0x7fffffff |
| ATOM | 3479 | C2  | U B | 264 | 59.474 | 17.398 | 137.282 | 0.00nan0x7fffffff |
| ATOM | 3480 | O3* | U B | 264 | 55.425 | 14.328 | 135.786 | 0.00nan0x7fffffff |
| ATOM | 3481 | P   | C B | 265 | 54.896 | 13.508 | 137.069 | 0.00nan0x7fffffff |
| ATOM | 3482 | O1P | C B | 265 | 53.557 | 13.029 | 136.637 | 0.00nan0x7fffffff |
| ATOM | 3483 | O2P | C B | 265 | 54.815 | 14.400 | 138.271 | 0.00nan0x7fffffff |
| ATOM | 3484 | O5* | C B | 265 | 55.980 | 12.359 | 137.267 | 0.00nan0x7fffffff |
| ATOM | 3485 | C5* | C B | 265 | 55.956 | 11.195 | 136.400 | 0.00nan0x7fffffff |
| ATOM | 3486 | C4* | C B | 265 | 57.163 | 10.361 | 136.751 | 0.00nan0x7fffffff |
| ATOM | 3487 | C3* | C B | 265 | 57.460 | 10.186 | 138.230 | 0.00nan0x7fffffff |
| ATOM | 3488 | O4* | C B | 265 | 58.348 | 11.002 | 136.226 | 0.00nan0x7fffffff |
| ATOM | 3489 | O2* | C B | 265 | 59.088 | 8.490  | 137.902 | 0.00nan0x7fffffff |
| ATOM | 3490 | C2* | C B | 265 | 58.953 | 9.868  | 138.214 | 0.00nan0x7fffffff |
| ATOM | 3491 | C1* | C B | 265 | 59.447 | 10.742 | 137.068 | 0.00nan0x7fffffff |
| ATOM | 3492 | N1  | C B | 265 | 60.018 | 11.978 | 137.650 | 0.00nan0x7fffffff |
| ATOM | 3493 | C6  | C B | 265 | 59.370 | 13.177 | 137.605 | 0.00nan0x7fffffff |
| ATOM | 3494 | C5  | C B | 265 | 59.886 | 14.295 | 138.139 | 0.00nan0x7fffffff |
| ATOM | 3495 | N4  | C B | 265 | 61.742 | 15.256 | 139.326 | 0.00nan0x7fffffff |
| ATOM | 3496 | C4  | C B | 265 | 61.155 | 14.193 | 138.770 | 0.00nan0x7fffffff |
| ATOM | 3497 | N3  | C B | 265 | 61.794 | 12.991 | 138.815 | 0.00nan0x7fffffff |
| ATOM | 3498 | O2  | C B | 265 | 61.839 | 10.783 | 138.313 | 0.00nan0x7fffffff |
| ATOM | 3499 | C2  | C B | 265 | 61.253 | 11.863 | 138.266 | 0.00nan0x7fffffff |
| ATOM | 3500 | O3* | C B | 265 | 56.684 | 9.160  | 138.854 | 0.00nan0x7fffffff |
| ATOM | 3501 | P   | A B | 266 | 56.209 | 9.330  | 140.384 | 0.00nan0x7fffffff |
| ATOM | 3502 | O1P | A B | 266 | 54.990 | 8.484  | 140.460 | 0.00nan0x7fffffff |
| ATOM | 3503 | O2P | A B | 266 | 55.925 | 10.766 | 140.698 | 0.00nan0x7fffffff |
| ATOM | 3504 | O5* | A B | 266 | 57.448 | 8.783  | 141.229 | 0.00nan0x7fffffff |
| ATOM | 3505 | C5* | A B | 266 | 57.700 | 7.356  | 141.294 | 0.00nan0x7fffffff |
| ATOM | 3506 | C4* | A B | 266 | 59.100 | 7.171  | 141.823 | 0.00nan0x7fffffff |
| ATOM | 3507 | C3* | A B | 266 | 59.390 | 7.758  | 143.196 | 0.00nan0x7fffffff |
| ATOM | 3508 | O4* | A B | 266 | 60.034 | 7.841  | 140.946 | 0.00nan0x7fffffff |
| ATOM | 3509 | O2* | A B | 266 | 61.490 | 6.660  | 143.419 | 0.00nan0x7fffffff |
| ATOM | 3510 | C2* | A B | 266 | 60.904 | 7.925  | 143.145 | 0.00nan0x7fffffff |
| ATOM | 3511 | C1* | A B | 266 | 61.132 | 8.313  | 141.689 | 0.00nan0x7fffffff |
| ATOM | 3512 | N9  | A B | 266 | 61.295 | 9.778  | 141.603 | 0.00nan0x7fffffff |
| ATOM | 3513 | C8  | A B | 266 | 60.516 | 10.679 | 140.926 | 0.00nan0x7fffffff |
| ATOM | 3514 | N7  | A B | 266 | 60.941 | 11.916 | 141.010 | 0.00nan0x7fffffff |
| ATOM | 3515 | C5  | A B | 266 | 62.090 | 11.817 | 141.788 | 0.00nan0x7fffffff |
| ATOM | 3516 | N6  | A B | 266 | 62.901 | 14.093 | 141.963 | 0.00nan0x7fffffff |
| ATOM | 3517 | C6  | A B | 266 | 63.005 | 12.800 | 142.237 | 0.00nan0x7fffffff |
| ATOM | 3518 | N1  | A B | 266 | 64.038 | 12.326 | 142.996 | 0.00nan0x7fffffff |
| ATOM | 3519 | C2  | A B | 266 | 64.162 | 11.002 | 143.289 | 0.00nan0x7fffffff |

|      |      |     |         |        |        |         |                   |
|------|------|-----|---------|--------|--------|---------|-------------------|
| ATOM | 3520 | N3  | A B 266 | 63.340 | 10.030 | 142.898 | 0.00nan0x7fffffff |
| ATOM | 3521 | C4  | A B 266 | 62.325 | 10.508 | 142.150 | 0.00nan0x7fffffff |
| ATOM | 3522 | O3* | A B 266 | 58.908 | 6.934  | 144.251 | 0.00nan0x7fffffff |
| ATOM | 3523 | P   | G B 267 | 59.496 | 6.571  | 145.660 | 0.00nan0x7fffffff |
| ATOM | 3524 | O1P | G B 267 | 60.396 | 5.405  | 145.418 | 0.00nan0x7fffffff |
| ATOM | 3525 | O2P | G B 267 | 58.400 | 6.185  | 146.631 | 0.00nan0x7fffffff |
| ATOM | 3526 | O5* | G B 267 | 60.252 | 7.870  | 146.199 | 0.00nan0x7fffffff |
| ATOM | 3527 | C5* | G B 267 | 61.653 | 8.126  | 145.949 | 0.00nan0x7fffffff |
| ATOM | 3528 | C4* | G B 267 | 62.233 | 8.872  | 147.126 | 0.00nan0x7fffffff |
| ATOM | 3529 | C3* | G B 267 | 62.717 | 8.009  | 148.282 | 0.00nan0x7fffffff |
| ATOM | 3530 | O4* | G B 267 | 61.219 | 9.717  | 147.714 | 0.00nan0x7fffffff |
| ATOM | 3531 | O2* | G B 267 | 63.827 | 9.780  | 149.409 | 0.00nan0x7fffffff |
| ATOM | 3532 | C2* | G B 267 | 62.649 | 8.987  | 149.452 | 0.00nan0x7fffffff |
| ATOM | 3533 | C1* | G B 267 | 61.417 | 9.812  | 149.105 | 0.00nan0x7fffffff |
| ATOM | 3534 | N9  | G B 267 | 60.270 | 9.285  | 149.873 | 0.00nan0x7fffffff |
| ATOM | 3535 | C8  | G B 267 | 59.116 | 8.727  | 149.391 | 0.00nan0x7fffffff |
| ATOM | 3536 | N7  | G B 267 | 58.277 | 8.360  | 150.326 | 0.00nan0x7fffffff |
| ATOM | 3537 | C5  | G B 267 | 58.925 | 8.705  | 151.509 | 0.00nan0x7fffffff |
| ATOM | 3538 | O6  | G B 267 | 57.489 | 8.083  | 153.305 | 0.00nan0x7fffffff |
| ATOM | 3539 | C6  | G B 267 | 58.537 | 8.566  | 152.867 | 0.00nan0x7fffffff |
| ATOM | 3540 | N1  | G B 267 | 59.460 | 9.031  | 153.769 | 0.00nan0x7fffffff |
| ATOM | 3541 | N2  | G B 267 | 61.432 | 9.985  | 154.390 | 0.00nan0x7fffffff |
| ATOM | 3542 | C2  | G B 267 | 60.645 | 9.580  | 153.385 | 0.00nan0x7fffffff |
| ATOM | 3543 | N3  | G B 267 | 61.058 | 9.734  | 152.128 | 0.00nan0x7fffffff |
| ATOM | 3544 | C4  | G B 267 | 60.150 | 9.276  | 151.243 | 0.00nan0x7fffffff |
| ATOM | 3545 | O3* | G B 267 | 64.029 | 7.475  | 148.087 | 0.00nan0x7fffffff |
| ATOM | 3546 | P   | C B 268 | 64.406 | 5.970  | 148.522 | 0.00nan0x7fffffff |
| ATOM | 3547 | O1P | C B 268 | 65.581 | 5.655  | 147.667 | 0.00nan0x7fffffff |
| ATOM | 3548 | O2P | C B 268 | 63.258 | 5.041  | 148.263 | 0.00nan0x7fffffff |
| ATOM | 3549 | O5* | C B 268 | 64.727 | 6.081  | 150.075 | 0.00nan0x7fffffff |
| ATOM | 3550 | C5* | C B 268 | 65.822 | 6.914  | 150.540 | 0.00nan0x7fffffff |
| ATOM | 3551 | C4* | C B 268 | 65.738 | 6.933  | 152.047 | 0.00nan0x7fffffff |
| ATOM | 3552 | C3* | C B 268 | 65.559 | 5.584  | 152.723 | 0.00nan0x7fffffff |
| ATOM | 3553 | O4* | C B 268 | 64.567 | 7.685  | 152.439 | 0.00nan0x7fffffff |
| ATOM | 3554 | O2* | C B 268 | 65.940 | 6.403  | 154.919 | 0.00nan0x7fffffff |
| ATOM | 3555 | C2* | C B 268 | 64.905 | 5.980  | 154.045 | 0.00nan0x7fffffff |
| ATOM | 3556 | C1* | C B 268 | 64.026 | 7.149  | 153.624 | 0.00nan0x7fffffff |
| ATOM | 3557 | N1  | C B 268 | 62.646 | 6.649  | 153.433 | 0.00nan0x7fffffff |
| ATOM | 3558 | C6  | C B 268 | 62.064 | 6.560  | 152.203 | 0.00nan0x7fffffff |
| ATOM | 3559 | C5  | C B 268 | 60.811 | 6.112  | 152.030 | 0.00nan0x7fffffff |
| ATOM | 3560 | N4  | C B 268 | 58.836 | 5.267  | 153.109 | 0.00nan0x7fffffff |
| ATOM | 3561 | C4  | C B 268 | 60.089 | 5.725  | 153.191 | 0.00nan0x7fffffff |
| ATOM | 3562 | N3  | C B 268 | 60.676 | 5.818  | 154.416 | 0.00nan0x7fffffff |
| ATOM | 3563 | O2  | C B 268 | 62.473 | 6.358  | 155.684 | 0.00nan0x7fffffff |
| ATOM | 3564 | C2  | C B 268 | 61.953 | 6.277  | 154.574 | 0.00nan0x7fffffff |
| ATOM | 3565 | O3* | C B 268 | 66.785 | 4.871  | 152.908 | 0.00nan0x7fffffff |
| ATOM | 3566 | P   | U B 269 | 66.844 | 3.270  | 152.748 | 0.00nan0x7fffffff |
| ATOM | 3567 | O1P | U B 269 | 68.232 | 3.024  | 152.278 | 0.00nan0x7fffffff |
| ATOM | 3568 | O2P | U B 269 | 65.820 | 2.794  | 151.764 | 0.00nan0x7fffffff |
| ATOM | 3569 | O5* | U B 269 | 66.537 | 2.727  | 154.216 | 0.00nan0x7fffffff |
| ATOM | 3570 | C5* | U B 269 | 67.235 | 3.283  | 155.360 | 0.00nan0x7fffffff |
| ATOM | 3571 | C4* | U B 269 | 66.475 | 2.857  | 156.593 | 0.00nan0x7fffffff |
| ATOM | 3572 | C3* | U B 269 | 65.980 | 1.420  | 156.614 | 0.00nan0x7fffffff |
| ATOM | 3573 | O4* | U B 269 | 65.269 | 3.649  | 156.697 | 0.00nan0x7fffffff |
| ATOM | 3574 | O2* | U B 269 | 65.351 | 1.456  | 158.902 | 0.00nan0x7fffffff |
| ATOM | 3575 | C2* | U B 269 | 64.810 | 1.506  | 157.591 | 0.00nan0x7fffffff |
| ATOM | 3576 | C1* | U B 269 | 64.241 | 2.885  | 157.282 | 0.00nan0x7fffffff |
| ATOM | 3577 | N1  | U B 269 | 63.080 | 2.717  | 156.380 | 0.00nan0x7fffffff |
| ATOM | 3578 | C6  | U B 269 | 63.109 | 3.097  | 155.070 | 0.00nan0x7fffffff |
| ATOM | 3579 | C5  | U B 269 | 62.053 | 2.949  | 154.255 | 0.00nan0x7fffffff |
| ATOM | 3580 | O4  | U B 269 | 59.811 | 2.183  | 154.135 | 0.00nan0x7fffffff |
| ATOM | 3581 | C4  | U B 269 | 60.870 | 2.374  | 154.801 | 0.00nan0x7fffffff |
| ATOM | 3582 | N3  | U B 269 | 60.855 | 2.001  | 156.113 | 0.00nan0x7fffffff |
| ATOM | 3583 | O2  | U B 269 | 61.906 | 1.817  | 158.110 | 0.00nan0x7fffffff |



|      |      |     |         |        |         |         |                   |
|------|------|-----|---------|--------|---------|---------|-------------------|
| ATOM | 3584 | C2  | U B 269 | 61.938 | 2.159   | 156.930 | 0.00nan0x7fffffff |
| ATOM | 3585 | O3* | U B 269 | 66.975 | 0.480   | 157.028 | 0.00nan0x7fffffff |
| ATOM | 3586 | P   | A B 270 | 67.053 | -0.985  | 156.367 | 0.00nan0x7fffffff |
| ATOM | 3587 | O1P | A B 270 | 68.498 | -1.321  | 156.446 | 0.00nan0x7fffffff |
| ATOM | 3588 | O2P | A B 270 | 66.553 | -0.961  | 154.955 | 0.00nan0x7fffffff |
| ATOM | 3589 | O5* | A B 270 | 66.115 | -1.876  | 157.301 | 0.00nan0x7fffffff |
| ATOM | 3590 | C5* | A B 270 | 66.256 | -1.816  | 158.743 | 0.00nan0x7fffffff |
| ATOM | 3591 | C4* | A B 270 | 65.016 | -2.440  | 159.337 | 0.00nan0x7fffffff |
| ATOM | 3592 | C3* | A B 270 | 64.518 | -3.712  | 158.671 | 0.00nan0x7fffffff |
| ATOM | 3593 | O4* | A B 270 | 63.914 | -1.513  | 159.201 | 0.00nan0x7fffffff |
| ATOM | 3594 | O2* | A B 270 | 62.943 | -4.227  | 160.371 | 0.00nan0x7fffffff |
| ATOM | 3595 | C2* | A B 270 | 63.040 | -3.707  | 159.053 | 0.00nan0x7fffffff |
| ATOM | 3596 | C1* | A B 270 | 62.710 | -2.221  | 159.023 | 0.00nan0x7fffffff |
| ATOM | 3597 | N9  | A B 270 | 62.061 | -1.914  | 157.732 | 0.00nan0x7fffffff |
| ATOM | 3598 | C8  | A B 270 | 62.562 | -1.189  | 156.682 | 0.00nan0x7fffffff |
| ATOM | 3599 | N7  | A B 270 | 61.737 | -1.083  | 155.670 | 0.00nan0x7fffffff |
| ATOM | 3600 | C5  | A B 270 | 60.611 | -1.788  | 156.087 | 0.00nan0x7fffffff |
| ATOM | 3601 | N6  | A B 270 | 59.064 | -1.610  | 154.231 | 0.00nan0x7fffffff |
| ATOM | 3602 | C6  | A B 270 | 59.375 | -2.043  | 155.445 | 0.00nan0x7fffffff |
| ATOM | 3603 | N1  | A B 270 | 58.488 | -2.786  | 156.173 | 0.00nan0x7fffffff |
| ATOM | 3604 | C2  | A B 270 | 58.789 | -3.239  | 157.421 | 0.00nan0x7fffffff |
| ATOM | 3605 | N3  | A B 270 | 59.928 | -3.035  | 158.078 | 0.00nan0x7fffffff |
| ATOM | 3606 | C4  | A B 270 | 60.796 | -2.301  | 157.353 | 0.00nan0x7fffffff |
| ATOM | 3607 | O3* | A B 270 | 65.197 | -4.890  | 159.113 | 0.00nan0x7fffffff |
| ATOM | 3608 | P   | U B 271 | 65.511 | -6.094  | 158.092 | 0.00nan0x7fffffff |
| ATOM | 3609 | O1P | U B 271 | 66.774 | -6.672  | 158.621 | 0.00nan0x7fffffff |
| ATOM | 3610 | O2P | U B 271 | 65.666 | -5.581  | 156.693 | 0.00nan0x7fffffff |
| ATOM | 3611 | O5* | U B 271 | 64.241 | -7.049  | 158.225 | 0.00nan0x7fffffff |
| ATOM | 3612 | C5* | U B 271 | 63.754 | -7.439  | 159.534 | 0.00nan0x7fffffff |
| ATOM | 3613 | C4* | U B 271 | 62.358 | -7.982  | 159.346 | 0.00nan0x7fffffff |
| ATOM | 3614 | C3* | U B 271 | 62.151 | -8.905  | 158.157 | 0.00nan0x7fffffff |
| ATOM | 3615 | O4* | U B 271 | 61.456 | -6.878  | 159.100 | 0.00nan0x7fffffff |
| ATOM | 3616 | O2* | U B 271 | 59.980 | -9.602  | 158.818 | 0.00nan0x7fffffff |
| ATOM | 3617 | C2* | U B 271 | 60.653 | -8.753  | 157.901 | 0.00nan0x7fffffff |
| ATOM | 3618 | C1* | U B 271 | 60.422 | -7.286  | 158.236 | 0.00nan0x7fffffff |
| ATOM | 3619 | N1  | U B 271 | 60.410 | -6.517  | 156.972 | 0.00nan0x7fffffff |
| ATOM | 3620 | C6  | U B 271 | 61.403 | -5.646  | 156.634 | 0.00nan0x7fffffff |
| ATOM | 3621 | C5  | U B 271 | 61.388 | -4.946  | 155.490 | 0.00nan0x7fffffff |
| ATOM | 3622 | O4  | U B 271 | 60.155 | -4.534  | 153.505 | 0.00nan0x7fffffff |
| ATOM | 3623 | C4  | U B 271 | 60.283 | -5.135  | 154.611 | 0.00nan0x7fffffff |
| ATOM | 3624 | N3  | U B 271 | 59.296 | -6.009  | 154.963 | 0.00nan0x7fffffff |
| ATOM | 3625 | O2  | U B 271 | 58.427 | -7.496  | 156.431 | 0.00nan0x7fffffff |
| ATOM | 3626 | C2  | U B 271 | 59.326 | -6.714  | 156.132 | 0.00nan0x7fffffff |
| ATOM | 3627 | O3* | U B 271 | 62.531 | -10.260 | 158.413 | 0.00nan0x7fffffff |
| ATOM | 3628 | P   | G B 272 | 63.223 | -11.155 | 157.268 | 0.00nan0x7fffffff |
| ATOM | 3629 | O1P | G B 272 | 64.072 | -12.101 | 158.040 | 0.00nan0x7fffffff |
| ATOM | 3630 | O2P | G B 272 | 64.030 | -10.301 | 156.339 | 0.00nan0x7fffffff |
| ATOM | 3631 | O5* | G B 272 | 61.993 | -11.834 | 156.515 | 0.00nan0x7fffffff |
| ATOM | 3632 | C5* | G B 272 | 60.964 | -12.522 | 157.272 | 0.00nan0x7fffffff |
| ATOM | 3633 | C4* | G B 272 | 59.790 | -12.722 | 156.345 | 0.00nan0x7fffffff |
| ATOM | 3634 | C3* | G B 272 | 60.117 | -13.201 | 154.941 | 0.00nan0x7fffffff |
| ATOM | 3635 | O4* | G B 272 | 59.132 | -11.450 | 156.142 | 0.00nan0x7fffffff |
| ATOM | 3636 | O2* | G B 272 | 57.863 | -13.655 | 154.351 | 0.00nan0x7fffffff |
| ATOM | 3637 | C2* | G B 272 | 58.904 | -12.711 | 154.152 | 0.00nan0x7fffffff |
| ATOM | 3638 | C1* | G B 272 | 58.590 | -11.391 | 154.844 | 0.00nan0x7fffffff |
| ATOM | 3639 | N9  | G B 272 | 59.171 | -10.295 | 154.040 | 0.00nan0x7fffffff |
| ATOM | 3640 | C8  | G B 272 | 60.222 | -9.477  | 154.361 | 0.00nan0x7fffffff |
| ATOM | 3641 | N7  | G B 272 | 60.500 | -8.589  | 153.441 | 0.00nan0x7fffffff |
| ATOM | 3642 | C5  | G B 272 | 59.560 | -8.839  | 152.443 | 0.00nan0x7fffffff |
| ATOM | 3643 | O6  | G B 272 | 59.961 | -7.274  | 150.693 | 0.00nan0x7fffffff |
| ATOM | 3644 | C6  | G B 272 | 59.337 | -8.215  | 151.188 | 0.00nan0x7fffffff |
| ATOM | 3645 | N1  | G B 272 | 58.297 | -8.750  | 150.470 | 0.00nan0x7fffffff |
| ATOM | 3646 | N2  | G B 272 | 56.572 | -10.192 | 150.106 | 0.00nan0x7fffffff |
| ATOM | 3647 | C2  | G B 272 | 57.549 | -9.790  | 150.929 | 0.00nan0x7fffffff |

|      |      |     |         |        |         |         |                   |
|------|------|-----|---------|--------|---------|---------|-------------------|
| ATOM | 3648 | N3  | G B 272 | 57.716 | -10.409 | 152.097 | 0.00nan0x7fffffff |
| ATOM | 3649 | C4  | G B 272 | 58.737 | -9.884  | 152.802 | 0.00nan0x7fffffff |
| ATOM | 3650 | O3* | G B 272 | 60.299 | -14.616 | 154.848 | 0.00nan0x7fffffff |
| ATOM | 3651 | P   | C B 273 | 61.404 | -15.245 | 153.861 | 0.00nan0x7fffffff |
| ATOM | 3652 | O1P | C B 273 | 61.810 | -16.496 | 154.553 | 0.00nan0x7fffffff |
| ATOM | 3653 | O2P | C B 273 | 62.554 | -14.302 | 153.678 | 0.00nan0x7fffffff |
| ATOM | 3654 | O5* | C B 273 | 60.613 | -15.471 | 152.495 | 0.00nan0x7fffffff |
| ATOM | 3655 | C5* | C B 273 | 59.344 | -16.173 | 152.493 | 0.00nan0x7fffffff |
| ATOM | 3656 | C4* | C B 273 | 58.684 | -15.894 | 151.164 | 0.00nan0x7fffffff |
| ATOM | 3657 | C3* | C B 273 | 59.575 | -15.997 | 149.938 | 0.00nan0x7fffffff |
| ATOM | 3658 | O4* | C B 273 | 58.219 | -14.525 | 151.151 | 0.00nan0x7fffffff |
| ATOM | 3659 | O2* | C B 273 | 57.790 | -15.869 | 148.378 | 0.00nan0x7fffffff |
| ATOM | 3660 | C2* | C B 273 | 58.842 | -15.100 | 148.942 | 0.00nan0x7fffffff |
| ATOM | 3661 | C1* | C B 273 | 58.298 | -14.003 | 149.846 | 0.00nan0x7fffffff |
| ATOM | 3662 | N1  | C B 273 | 59.204 | -12.836 | 149.760 | 0.00nan0x7fffffff |
| ATOM | 3663 | C6  | C B 273 | 59.988 | -12.438 | 150.803 | 0.00nan0x7fffffff |
| ATOM | 3664 | C5  | C B 273 | 60.804 | -11.375 | 150.727 | 0.00nan0x7fffffff |
| ATOM | 3665 | N4  | C B 273 | 61.608 | -9.583  | 149.341 | 0.00nan0x7fffffff |
| ATOM | 3666 | C4  | C B 273 | 60.826 | -10.654 | 149.502 | 0.00nan0x7fffffff |
| ATOM | 3667 | N3  | C B 273 | 60.037 | -11.054 | 148.467 | 0.00nan0x7fffffff |
| ATOM | 3668 | O2  | C B 273 | 58.506 | -12.491 | 147.621 | 0.00nan0x7fffffff |
| ATOM | 3669 | C2  | C B 273 | 59.213 | -12.139 | 148.562 | 0.00nan0x7fffffff |
| ATOM | 3670 | O3* | C B 273 | 59.733 | -17.335 | 149.458 | 0.00nan0x7fffffff |
| ATOM | 3671 | P   | G B 274 | 61.137 | -17.843 | 148.857 | 0.00nan0x7fffffff |
| ATOM | 3672 | O1P | G B 274 | 61.145 | -19.293 | 149.184 | 0.00nan0x7fffffff |
| ATOM | 3673 | O2P | G B 274 | 62.283 | -17.114 | 149.490 | 0.00nan0x7fffffff |
| ATOM | 3674 | O5* | G B 274 | 61.028 | -17.517 | 147.300 | 0.00nan0x7fffffff |
| ATOM | 3675 | C5* | G B 274 | 59.856 | -17.919 | 146.546 | 0.00nan0x7fffffff |
| ATOM | 3676 | C4* | G B 274 | 59.880 | -17.148 | 145.248 | 0.00nan0x7fffffff |
| ATOM | 3677 | C3* | G B 274 | 61.225 | -17.058 | 144.547 | 0.00nan0x7fffffff |
| ATOM | 3678 | O4* | G B 274 | 59.526 | -15.772 | 145.517 | 0.00nan0x7fffffff |
| ATOM | 3679 | O2* | G B 274 | 60.352 | -16.142 | 142.538 | 0.00nan0x7fffffff |
| ATOM | 3680 | C2* | G B 274 | 61.062 | -15.787 | 143.716 | 0.00nan0x7fffffff |
| ATOM | 3681 | C1* | G B 274 | 60.210 | -14.917 | 144.631 | 0.00nan0x7fffffff |
| ATOM | 3682 | N9  | G B 274 | 61.095 | -13.966 | 145.335 | 0.00nan0x7fffffff |
| ATOM | 3683 | C8  | G B 274 | 61.405 | -13.931 | 146.669 | 0.00nan0x7fffffff |
| ATOM | 3684 | N7  | G B 274 | 62.208 | -12.951 | 146.999 | 0.00nan0x7fffffff |
| ATOM | 3685 | C5  | G B 274 | 62.436 | -12.289 | 145.794 | 0.00nan0x7fffffff |
| ATOM | 3686 | O6  | G B 274 | 63.898 | -10.468 | 146.260 | 0.00nan0x7fffffff |
| ATOM | 3687 | C6  | G B 274 | 63.220 | -11.147 | 145.485 | 0.00nan0x7fffffff |
| ATOM | 3688 | N1  | G B 274 | 63.196 | -10.788 | 144.161 | 0.00nan0x7fffffff |
| ATOM | 3689 | N2  | G B 274 | 62.563 | -10.991 | 141.984 | 0.00nan0x7fffffff |
| ATOM | 3690 | C2  | G B 274 | 62.479 | -11.474 | 143.230 | 0.00nan0x7fffffff |
| ATOM | 3691 | N3  | G B 274 | 61.729 | -12.549 | 143.466 | 0.00nan0x7fffffff |
| ATOM | 3692 | C4  | G B 274 | 61.753 | -12.901 | 144.766 | 0.00nan0x7fffffff |
| ATOM | 3693 | O3* | G B 274 | 61.526 | -18.204 | 143.745 | 0.00nan0x7fffffff |
| ATOM | 3694 | P   | G B 275 | 63.018 | -18.797 | 143.649 | 0.00nan0x7fffffff |
| ATOM | 3695 | O1P | G B 275 | 62.796 | -20.247 | 143.409 | 0.00nan0x7fffffff |
| ATOM | 3696 | O2P | G B 275 | 63.776 | -18.544 | 144.917 | 0.00nan0x7fffffff |
| ATOM | 3697 | O5* | G B 275 | 63.665 | -18.015 | 142.419 | 0.00nan0x7fffffff |
| ATOM | 3698 | C5* | G B 275 | 63.038 | -18.047 | 141.111 | 0.00nan0x7fffffff |
| ATOM | 3699 | C4* | G B 275 | 63.629 | -16.909 | 140.312 | 0.00nan0x7fffffff |
| ATOM | 3700 | C3* | G B 275 | 65.143 | -16.791 | 140.339 | 0.00nan0x7fffffff |
| ATOM | 3701 | O4* | G B 275 | 63.165 | -15.660 | 140.873 | 0.00nan0x7fffffff |
| ATOM | 3702 | O2* | G B 275 | 65.248 | -15.156 | 138.620 | 0.00nan0x7fffffff |
| ATOM | 3703 | C2* | G B 275 | 65.348 | -15.310 | 140.028 | 0.00nan0x7fffffff |
| ATOM | 3704 | C1* | G B 275 | 64.160 | -14.672 | 140.737 | 0.00nan0x7fffffff |
| ATOM | 3705 | N9  | G B 275 | 64.622 | -14.161 | 142.045 | 0.00nan0x7fffffff |
| ATOM | 3706 | C8  | G B 275 | 64.282 | -14.612 | 143.294 | 0.00nan0x7fffffff |
| ATOM | 3707 | N7  | G B 275 | 64.858 | -13.953 | 144.267 | 0.00nan0x7fffffff |
| ATOM | 3708 | C5  | G B 275 | 65.632 | -12.999 | 143.610 | 0.00nan0x7fffffff |
| ATOM | 3709 | O6  | G B 275 | 66.742 | -11.722 | 145.285 | 0.00nan0x7fffffff |
| ATOM | 3710 | C6  | G B 275 | 66.491 | -11.984 | 144.107 | 0.00nan0x7fffffff |
| ATOM | 3711 | N1  | G B 275 | 67.093 | -11.227 | 143.133 | 0.00nan0x7fffffff |

|      |      |     |         |        |         |         |                   |
|------|------|-----|---------|--------|---------|---------|-------------------|
| ATOM | 3712 | N2  | G B 275 | 67.543 | -10.613 | 140.987 | 0.00nan0x7fffffff |
| ATOM | 3713 | C2  | G B 275 | 66.879 | -11.439 | 141.805 | 0.00nan0x7fffffff |
| ATOM | 3714 | N3  | G B 275 | 66.086 | -12.376 | 141.287 | 0.00nan0x7fffffff |
| ATOM | 3715 | C4  | G B 275 | 65.495 | -13.118 | 142.244 | 0.00nan0x7fffffff |
| ATOM | 3716 | O3* | G B 275 | 65.802 | -17.646 | 139.401 | 0.00nan0x7fffffff |
| ATOM | 3717 | P   | G B 276 | 67.197 | -18.361 | 139.773 | 0.00nan0x7fffffff |
| ATOM | 3718 | O1P | G B 276 | 67.138 | -19.639 | 139.016 | 0.00nan0x7fffffff |
| ATOM | 3719 | O2P | G B 276 | 67.302 | -18.585 | 141.251 | 0.00nan0x7fffffff |
| ATOM | 3720 | O5* | G B 276 | 68.303 | -17.336 | 139.259 | 0.00nan0x7fffffff |
| ATOM | 3721 | C5* | G B 276 | 68.188 | -16.746 | 137.938 | 0.00nan0x7fffffff |
| ATOM | 3722 | C4* | G B 276 | 69.171 | -15.602 | 137.878 | 0.00nan0x7fffffff |
| ATOM | 3723 | C3* | G B 276 | 70.521 | -15.838 | 138.531 | 0.00nan0x7fffffff |
| ATOM | 3724 | O4* | G B 276 | 68.622 | -14.473 | 138.596 | 0.00nan0x7fffffff |
| ATOM | 3725 | O2* | G B 276 | 71.522 | -13.879 | 137.638 | 0.00nan0x7fffffff |
| ATOM | 3726 | C2* | G B 276 | 70.976 | -14.412 | 138.835 | 0.00nan0x7fffffff |
| ATOM | 3727 | C1* | G B 276 | 69.661 | -13.731 | 139.192 | 0.00nan0x7fffffff |
| ATOM | 3728 | N9  | G B 276 | 69.547 | -13.680 | 140.664 | 0.00nan0x7fffffff |
| ATOM | 3729 | C8  | G B 276 | 68.694 | -14.385 | 141.472 | 0.00nan0x7fffffff |
| ATOM | 3730 | N7  | G B 276 | 68.830 | -14.116 | 142.745 | 0.00nan0x7fffffff |
| ATOM | 3731 | C5  | G B 276 | 69.845 | -13.163 | 142.778 | 0.00nan0x7fffffff |
| ATOM | 3732 | O6  | G B 276 | 70.193 | -12.584 | 145.061 | 0.00nan0x7fffffff |
| ATOM | 3733 | C6  | G B 276 | 70.453 | -12.475 | 143.860 | 0.00nan0x7fffffff |
| ATOM | 3734 | N1  | G B 276 | 71.437 | -11.595 | 143.488 | 0.00nan0x7fffffff |
| ATOM | 3735 | N2  | G B 276 | 72.774 | -10.510 | 141.998 | 0.00nan0x7fffffff |
| ATOM | 3736 | C2  | G B 276 | 71.796 | -11.404 | 142.190 | 0.00nan0x7fffffff |
| ATOM | 3737 | N3  | G B 276 | 71.260 | -12.022 | 141.138 | 0.00nan0x7fffffff |
| ATOM | 3738 | C4  | G B 276 | 70.293 | -12.887 | 141.504 | 0.00nan0x7fffffff |
| ATOM | 3739 | O3* | G B 276 | 71.444 | -16.544 | 137.697 | 0.00nan0x7fffffff |
| ATOM | 3740 | P   | G B 277 | 72.481 | -17.599 | 138.331 | 0.00nan0x7fffffff |
| ATOM | 3741 | O1P | G B 277 | 72.685 | -18.581 | 137.235 | 0.00nan0x7fffffff |
| ATOM | 3742 | O2P | G B 277 | 71.910 | -18.234 | 139.562 | 0.00nan0x7fffffff |
| ATOM | 3743 | O5* | G B 277 | 73.763 | -16.714 | 138.674 | 0.00nan0x7fffffff |
| ATOM | 3744 | C5* | G B 277 | 74.294 | -15.792 | 137.688 | 0.00nan0x7fffffff |
| ATOM | 3745 | C4* | G B 277 | 75.224 | -14.850 | 138.413 | 0.00nan0x7fffffff |
| ATOM | 3746 | C3* | G B 277 | 76.142 | -15.474 | 139.450 | 0.00nan0x7fffffff |
| ATOM | 3747 | O4* | G B 277 | 74.436 | -13.898 | 139.164 | 0.00nan0x7fffffff |
| ATOM | 3748 | O2* | G B 277 | 77.471 | -13.528 | 139.737 | 0.00nan0x7fffffff |
| ATOM | 3749 | C2* | G B 277 | 76.442 | -14.284 | 140.359 | 0.00nan0x7fffffff |
| ATOM | 3750 | C1* | G B 277 | 75.118 | -13.531 | 140.340 | 0.00nan0x7fffffff |
| ATOM | 3751 | N9  | G B 277 | 74.367 | -13.884 | 141.563 | 0.00nan0x7fffffff |
| ATOM | 3752 | C8  | G B 277 | 73.225 | -14.632 | 141.667 | 0.00nan0x7fffffff |
| ATOM | 3753 | N7  | G B 277 | 72.793 | -14.768 | 142.896 | 0.00nan0x7fffffff |
| ATOM | 3754 | C5  | G B 277 | 73.719 | -14.056 | 143.654 | 0.00nan0x7fffffff |
| ATOM | 3755 | O6  | G B 277 | 73.042 | -14.226 | 145.931 | 0.00nan0x7fffffff |
| ATOM | 3756 | C6  | G B 277 | 73.808 | -13.823 | 145.052 | 0.00nan0x7fffffff |
| ATOM | 3757 | N1  | G B 277 | 74.882 | -13.059 | 145.430 | 0.00nan0x7fffffff |
| ATOM | 3758 | N2  | G B 277 | 76.772 | -11.841 | 145.068 | 0.00nan0x7fffffff |
| ATOM | 3759 | C2  | G B 277 | 75.782 | -12.568 | 144.535 | 0.00nan0x7fffffff |
| ATOM | 3760 | N3  | G B 277 | 75.746 | -12.756 | 143.216 | 0.00nan0x7fffffff |
| ATOM | 3761 | C4  | G B 277 | 74.690 | -13.507 | 142.846 | 0.00nan0x7fffffff |
| ATOM | 3762 | O3* | G B 277 | 77.325 | -16.054 | 138.893 | 0.00nan0x7fffffff |
| ATOM | 3763 | P   | A B 278 | 77.946 | -17.406 | 139.508 | 0.00nan0x7fffffff |
| ATOM | 3764 | O1P | A B 278 | 78.650 | -18.016 | 138.350 | 0.00nan0x7fffffff |
| ATOM | 3765 | O2P | A B 278 | 76.865 | -18.294 | 140.044 | 0.00nan0x7fffffff |
| ATOM | 3766 | O5* | A B 278 | 78.908 | -16.892 | 140.671 | 0.00nan0x7fffffff |
| ATOM | 3767 | C5* | A B 278 | 79.979 | -15.961 | 140.370 | 0.00nan0x7fffffff |
| ATOM | 3768 | C4* | A B 278 | 80.461 | -15.399 | 141.685 | 0.00nan0x7fffffff |
| ATOM | 3769 | C3* | A B 278 | 80.778 | -16.409 | 142.775 | 0.00nan0x7fffffff |
| ATOM | 3770 | O4* | A B 278 | 79.418 | -14.577 | 142.255 | 0.00nan0x7fffffff |
| ATOM | 3771 | O2* | A B 278 | 81.824 | -14.832 | 144.209 | 0.00nan0x7fffffff |
| ATOM | 3772 | C2* | A B 278 | 80.620 | -15.565 | 144.038 | 0.00nan0x7fffffff |
| ATOM | 3773 | C1* | A B 278 | 79.465 | -14.646 | 143.661 | 0.00nan0x7fffffff |
| ATOM | 3774 | N9  | A B 278 | 78.225 | -15.199 | 144.243 | 0.00nan0x7fffffff |
| ATOM | 3775 | C8  | A B 278 | 77.147 | -15.737 | 143.589 | 0.00nan0x7fffffff |

|      |      |     |     |     |        |         |         |                   |
|------|------|-----|-----|-----|--------|---------|---------|-------------------|
| ATOM | 3776 | N7  | A B | 278 | 76.194 | -16.146 | 144.388 | 0.00nan0x7fffffff |
| ATOM | 3777 | C5  | A B | 278 | 76.681 | -15.858 | 145.659 | 0.00nan0x7fffffff |
| ATOM | 3778 | N6  | A B | 278 | 74.935 | -16.606 | 147.162 | 0.00nan0x7fffffff |
| ATOM | 3779 | C6  | A B | 278 | 76.123 | -16.059 | 146.944 | 0.00nan0x7fffffff |
| ATOM | 3780 | N1  | A B | 278 | 76.904 | -15.643 | 147.986 | 0.00nan0x7fffffff |
| ATOM | 3781 | C2  | A B | 278 | 78.126 | -15.079 | 147.783 | 0.00nan0x7fffffff |
| ATOM | 3782 | N3  | A B | 278 | 78.706 | -14.862 | 146.605 | 0.00nan0x7fffffff |
| ATOM | 3783 | C4  | A B | 278 | 77.928 | -15.276 | 145.584 | 0.00nan0x7fffffff |
| ATOM | 3784 | O3* | A B | 278 | 82.079 | -16.990 | 142.661 | 0.00nan0x7fffffff |
